# Supplementary material for: What’s a Biofilm?—How the Choice of the Biofilm Model Impacts the Protein Inventory of Clostridioides difficile
Source: Front Microbiol. 2021 Jun 10;12:682111. doi: 10.3389/fmicb.2021.682111 (PMC8225356; doi:10.3389/fmicb.2021.682111)
Supplement: Supplementary file 1 [file Table_1.XLSX]

## Sheet: S1_All proteins
Table S1: Log2 ratios of all proteins identified for colony biofilms (Col) vs. filtrate samples (Fil) and aggregate biofilms (Agg) vs. filtrate samples (Fil) on day 3 (3d) and day 6 (6d). Significant changes according to ANOVA analysis are indicated by a *. Regulon affiliations are given in column "S". "ON": Proteins were only identified under the respective biofilm condition. "OFF": Proteins wer…
			Col vs Fil (3d)		Col vs Fil (6d)		Agg vs Fil (3d)		Agg vs Fil (6d)
Locus tag	Gene name	Protein	Fold change [log2]	Sign.?	Fold change [log2]	Sign.?	Fold change [log2]	Sign.?	Fold change [log2]	Sign.?	Level 1	Level 2	Level 3	Operon/ Regulon	Localization	Alternative locus tag 1	Alternative locus tag 2	Regulon affiliation
CDIF630erm_00001	dnaA	Chromosomal replication initiator protein DnaA	-1.04106		-2.30309		2.30657	*	1.02111		Cellular Processes	DNA and RNA metabolism	DNA metabolism	CD0001	Cytoplasmic	CD0001	CD630_00010	SigB
CDIF630erm_00002	dnaN	DNA polymerase III subunit beta	-0.476547		-0.359779		-0.924839		-0.140423		Cellular Processes	DNA and RNA metabolism	DNA metabolism	CD0001	Cytoplasmic	CD0002	CD630_00020	SigB
CDIF630erm_00003	CD630_00030	Putative RNA-binding mediating protein	OFF		-0.581095	*	3.05889	*	2.07106		Cellular Processes	DNA and RNA metabolism	RNA Processing	CD0001	Cytoplasmic	CD0003	CD630_00030	SigB
CDIF630erm_00005	gyrB	DNA gyrase subunit B (EC 5.99.1.3)	-0.910999		0.0684356		-1.15258		1.19584		Cellular Processes	DNA and RNA metabolism	DNA metabolism	CD0001	Cytoplasmic	CD0005	CD630_00050	SigB
CDIF630erm_00006	gyrA	DNA gyrase subunit A (EC 5.99.1.3)	-0.9008		-0.3487		-0.991753	*	0.408689		Cellular Processes	DNA and RNA metabolism	DNA metabolism	CD0001	Cytoplasmic	CD0006	CD630_00060	SigB
CDIF630erm_00007	CD630_00070	Putative spore protein	-2.03156		-1.65615	*	0.147666		-1.11511		Cellular Processes	Sporulation and germination	Sporulation and germination	CD0001	CytoplasmicMembrane	CD0007	CD630_00070
CDIF630erm_00008	CD630_00080	Uncharacterized protein	0.460136		0.602423		1.60026		0.105068		Cell Envelope	Cell membrane	Cell membrane	Other	CytoplasmicMembrane	CD0008	CD630_00080
CDIF630erm_00009	rsbV	Anti-sigma factor antagonist	0.691142		1.34686		0.564473		0.604621		Cellular Processes	Stress Response and virulence	Universal stress response	CD0001	Unknown	CD0009	CD630_00090
CDIF630erm_00010	rsbW	Serine-protein kinase RsbW	0.350595		2.44363	*	-1.17223		-1.28661		Cellular Processes	Stress Response and virulence	Universal stress response	CD0001	Cytoplasmic	CD0010	CD630_00100
CDIF630erm_00011	sigB	RNA polymerase sigma-B factor (Sigma-37)	0.0684354				OFF				Cellular Processes	Stress Response and virulence	Universal stress response	CD0001	Cytoplasmic	CD0011	CD630_00110
CDIF630erm_00021	niaR	transcription repressor NiaR	1.11319		1.84706	*	0.99434		1.09763		Cellular Processes	Stress Response and virulence	Universal stress response	Other	Cytoplasmic	CD0012	CD630_00120
CDIF630erm_00024	serS1	Serine--tRNA ligase (EC 6.1.1.11) (Seryl-tRNA synthetase) (SerRS) (Seryl-tRNA(Ser/Sec) synthetase)	0.0633973		-0.287854		-0.755625		-0.724461		Cellular process	Protein synthesis	tRNA metabolism	Other	Cytoplasmic	CD0014	CD630_00140
CDIF630erm_00030	dnaX	DNA polymerase III subunit gamma/tau (EC 2.7.7.7)	-0.45091		-2.54867		3.25638	*	1.57637	*	Cellular Processes	DNA and RNA metabolism	DNA repair	CD0016	Cytoplasmic	CD0016	CD630_00160	SigF; SigE; SigB
CDIF630erm_00031	ybaB	Nucleoid-associated protein CD630_00170	0.710239		1.65045	*	-0.184314		-0.765279		Cellular Processes	DNA and RNA metabolism	DNA repair	CD0016	Unknown	CD0017	CD630_00170	ccpA; SigE; SigB
CDIF630erm_00032	recR	Recombination protein RecR	1.33897								Cellular Processes	DNA and RNA metabolism	DNA repair	CD0016	Cytoplasmic	CD0018	CD630_00180	ccpA; SigB
CDIF630erm_00034	ugtP1	processive diacylglycerol beta-glucosyltransferase	-0.0129304		-0.849819		1.78025	*	1.14411	*	Cell Envelope	Cell wall	Cell surface polysaccharides and lipopolysaccharides	Other	Cytoplasmic	CD0019	CD630_00190
CDIF630erm_00081	CD630_00200	Uncharacterized protein					ON				Miscellaneous	Miscellaneous	Uncharacterized proteins	Other	Cytoplasmic	CD0020	CD630_00200
CDIF630erm_00083	pycA	Pyruvate carboxylase (EC 6.4.1.1)	1.97177	*	1.47171		0.236863		1.33819		Cellular Processes	Energy metabolism	Glycolysis and gluconeogenesis	Other	Cytoplasmic	CD0021	CD630_00210
CDIF630erm_00084	fusA1	Elongation factor G (EF-G)	0.262689		1.03144		-0.816051		0.627686		Cellular process	Protein synthesis	Translation	Other	Cytoplasmic	CD0022	CD630_00220	SigH; CodY; SpoA
CDIF630erm_00085	ctsR	Transcriptional regulator CtsR	-0.451154		-1.72682		2.53421	*	0.848964		Cellular Processes	Stress Response and virulence	Universal stress response	CD0023	Cytoplasmic	CD0023	CD630_00230
CDIF630erm_00086	mcsA	Activator of protein kinase McsB	0.283671		1.09755		0.546917		0.957939		Cellular Processes	Stress Response and virulence	Universal stress response	CD0023	Cytoplasmic	CD0024	CD630_00240
CDIF630erm_00087	mcsB	Protein-arginine kinase (EC 2.7.14.1)	-0.770211		-1.0502		1.92909	*	1.08107		Cellular Processes	Stress Response and virulence	Universal stress response	CD0023	Cytoplasmic	CD0025	CD630_00250
CDIF630erm_00088	clpC	Class III stress response-related ATPase, AAA+ superfamily	-0.277648		0.471145		-1.88995	*	-0.919753		Cellular Processes	Stress Response and virulence	Universal stress response	CD0023	Cytoplasmic	CD0026	CD630_00260
CDIF630erm_00089	radA	DNA repair protein RadA	-1.03751		-2.53777		3.177		0.927906		Cellular Processes	DNA and RNA metabolism	DNA repair	CD0023	CytoplasmicMembrane	CD0027	CD630_00270
CDIF630erm_00090	disA	DNA integrity scanning protein DisA (Cyclic di-AMP synthase) (c-di-AMP synthase) (Diadenylate cyclase) (EC 2.7.7.85)	-0.363418		-0.58469		0.097287		1.90247		Cellular Processes	DNA and RNA metabolism	DNA repair	CD0023	CytoplasmicMembrane	CD0028	CD630_00280
CDIF630erm_00091	CD630_00290	Putative membrane protein	-1.9026		-2.38964	*	0.062453		-1.30374	*	Cell Envelope	Cell membrane	Cell membrane	Other	CytoplasmicMembrane	CD0029	CD630_00290
CDIF630erm_00092	CD630_00300	Putative membrane protein	OFF		OFF		0.666607		-1.52414		Cell Envelope	Cell membrane	Cell membrane	Other	CytoplasmicMembrane	CD0030	CD630_00300
CDIF630erm_00097	CD630_00350	transcriptional regulator with putative sugar-binding domain					ON		ON		Cellular Processes	Energy metabolism	Conversion of pyruvate to acetyl-CoA	CD0035	Cytoplasmic	CD0035	CD630_00350
CDIF630erm_00098	acoA	Acetoin dehydrogenase E1 component (TPP-dependent alpha subunit) (EC 1.2.4.1)	1.06755		1.74481		-1.43953		-0.605131		Cellular Processes	Energy metabolism	Conversion of pyruvate to acetyl-CoA	CD0035	Cytoplasmic	CD0036	CD630_00360
CDIF630erm_00099	acoB	Acetoin dehydrogenase E1 component (TPP-dependent beta subunit) (EC 1.2.4.1)	1.00734		1.48807		-0.709305		-0.412299		Cellular Processes	Energy metabolism	Conversion of pyruvate to acetyl-CoA	CD0035	Cytoplasmic	CD0037	CD630_00370
CDIF630erm_00100	acoC	Acetoin dehydrogenase E2 component (Dihydrolipoamide acetyltransferase) (EC 2.3.1.12)	ON		2.8478		ON		-0.111447		Cellular Processes	Energy metabolism	Conversion of pyruvate to acetyl-CoA	CD0035	Cytoplasmic	CD0038	CD630_00380
CDIF630erm_00101	acoL	acetoin dehydrogenase E3 component (dihydrolipoamide dehydrogenase)	0.673072		1.50426		-1.0734		0.552575		Cellular Processes	Energy metabolism	Conversion of pyruvate to acetyl-CoA	CD0035	Cytoplasmic	CD0039	CD630_00390	ccpA
CDIF630erm_00104	CD630_00420	PTS system, galactitol-specific IIB component					ON		ON		Cellular Processes	Energy metabolism	Galactitol-specific PTS	CD0040	Cytoplasmic	CD0042	CD630_00420	RpoN (Target)
CDIF630erm_00108	CD630_00460	Putative lipoate-protein ligase (EC 2.7.7.63)	-2.04601		-1.65641		1.7495		1.45737		Cellular process	Protein folding and degradation	Protein folding and degradation	Other	Cytoplasmic	CD0046	CD630_00460
CDIF630erm_00110	ispF	2-C-methyl-D-erythritol 2,4-cyclodiphosphate synthase (MECDP-synthase) (MECPP-synthase) (MECPS) (EC 4.6.1.12)	OFF		ON		-1.82943				Cellular Processes	Fatty acid metabolism	Isoprenoid metabolism	Other	Cytoplasmic	CD0048	CD630_00480	SigB
CDIF630erm_00112	proS1	Proline--tRNA ligase 1 (EC 6.1.1.15) (Prolyl-tRNA synthetase 1) (ProRS 1)	-4.08276	*	-4.14706		1.092	*	1.57338	*	Cellular process	Protein synthesis	tRNA metabolism	Other	Cytoplasmic	CD0049	CD630_00490
CDIF630erm_00113	proS2	Proline--tRNA ligase 2 (EC 6.1.1.15) (Prolyl-tRNA synthetase 2) (ProRS 2)	-1.91042	*	-2.56541	*	0.148413		0.2897		Cellular process	Protein synthesis	tRNA metabolism	Other	Cytoplasmic	CD0050	CD630_00500	Hfq
CDIF630erm_00114	gltX	Glutamate--tRNA ligase (EC 6.1.1.17) (Glutamyl-tRNA synthetase) (GluRS)	-0.27078		-0.908369		-1.37119	*	-1.53247		Cellular process	Protein synthesis	tRNA metabolism	Other	Cytoplasmic	CD0051	CD630_00510
CDIF630erm_00116	cysS	Cysteine--tRNA ligase (EC 6.1.1.16) (Cysteinyl-tRNA synthetase) (CysRS)	0.0587498		-0.755235		-0.330413		-0.778355		Cellular process	Protein Metabolism	tRNA metabolism	Other	Cytoplasmic	CD0052	CD630_00520
CDIF630erm_00118	thyX	Flavin-dependent thymidylate synthase (FDTS) (EC 2.1.1.148) (FAD-dependent thymidylate synthase) (Thymidylate synthase ThyX) (TS) (TSase)	-0.633183		-0.349059		-3.23102	*	OFF		Cellular Processes	DNA and RNA metabolism	Nucleosides and nucleotide metabolism	CD0052	Cytoplasmic	CD0054	CD630_00540
CDIF630erm_00119	CD630_00550	Putative tRNA/rRNA methyltransferase, TrmH family, group3 (EC 2.1.1.-)	-0.709714		-0.261338		-1.08175		0.466115		Cellular process	Protein synthesis	Ribosome biogenesis	CD0052	Unknown	CD0055	CD630_00550
CDIF630erm_00120	CD630_00560	Putative ribonuclease	OFF				0.809057		ON		Cellular Processes	DNA and RNA metabolism	Nucleosides and nucleotide metabolism	CD0052	Cytoplasmic	CD0056	CD630_00560
CDIF630erm_00124	secE	Protein translocase subunit SecE			OFF				OFF		Cellular process	Protein Metabolism	Sec secretion	Other	CytoplasmicMembrane	CD0059	CD630_00590	SigH; Hfq
CDIF630erm_00125	nusG	Transcription termination/antitermination protein NusG	-0.158408		-0.603761		1.62386	*	1.01798		Cellular Processes	DNA and RNA metabolism	Transcription	CD0052	Cytoplasmic	CD0060	CD630_00600	SigH
CDIF630erm_00126	rplK	50S ribosomal protein L11	-1.46308	*	-0.836144		-0.566973		-0.247904		Cellular process	Protein synthesis	Ribosome biogenesis	CD0052	Cytoplasmic	CD0061	CD630_00610	SigH
CDIF630erm_00127	rplA	50S ribosomal protein L1	-1.33051	*	-1.32627		-1.27124	*	-0.688449		Cellular process	Protein synthesis	Ribosome biogenesis	CD0052	Cytoplasmic	CD0062	CD630_00620	SigH
CDIF630erm_00129	rplJ	50S ribosomal protein L10	-0.563171		0.229361		-1.6475	*	-1.45359		Cellular process	Protein synthesis	Ribosome biogenesis	CD0052	Cytoplasmic	CD0063	CD630_00630	SigH
CDIF630erm_00130	rplL	50S ribosomal protein L7/L12	-0.262078		-0.416137		-0.820349		-2.75053	*	Cellular process	Protein synthesis	Ribosome biogenesis	CD0052	Cytoplasmic	CD0064	CD630_00640	SigH
CDIF630erm_00131	CD630_00650	Putative NADP-dependent deshydrogenase (EC 1.1.1.-)	-0.664986		-1.10561		0.224669		0.895629		Cellular Processes	Fatty Acids	Degradation of fatty acids	Other	Cytoplasmic	CD0065	CD630_00650	ccpA; SpoA
CDIF630erm_00132	rpoB	DNA-directed RNA polymerase subunit beta (RNAP subunit beta) (EC 2.7.7.6) (RNA polymerase subunit beta) (Transcriptase subunit beta)	0.275822		0.0460033		-0.583972		0.216977		Cellular Processes	DNA and RNA metabolism	Transcription	280819	Cytoplasmic	CD0066	CD630_00660	SigH
CDIF630erm_00133	rpoC	DNA-directed RNA polymerase subunit beta' (RNAP subunit beta') (EC 2.7.7.6) (RNA polymerase subunit beta') (Transcriptase subunit beta')	0.510722		-0.413367		0.642415		0.873161		Cellular Processes	DNA and RNA metabolism	Transcription	280819	Cytoplasmic	CD0067	CD630_00670	SigH
CDIF630erm_00134	rpsL	30S ribosomal protein S12	-1.04711		-0.262285		-0.484809		0.070218		Cellular process	Protein synthesis	Ribosome biogenesis	CD0068	Cytoplasmic	CD0068	CD630_00680	SigH
CDIF630erm_00135	rpsG	30S ribosomal protein S7	-1.54539	*	-1.65528	*	0.536981		0.106669		Cellular process	Protein synthesis	Ribosome biogenesis	CD0068	Cytoplasmic	CD0069	CD630_00690	SigH
CDIF630erm_00136	fusA	Elongation factor G (EF-G)	-1.04046	*	-0.504543		-1.43091	*	-0.550776		Cellular process	Protein Metabolism	Translation	CD0068	Cytoplasmic	CD0070	CD630_00700	SigH
CDIF630erm_00137	tuf	elongation factor EFTu / EF1A	0.179424		-0.84375		1.88758		0.997762		Cellular process	Protein synthesis	Translation	Other	Cytoplasmic	CD0071	CD630_00710
CDIF630erm_00138	rpsJ	30S ribosomal protein S10	-0.0899865		-0.336649		0.421581		0.337157		Cellular process	Protein synthesis	Ribosome biogenesis	CD0068	Cytoplasmic	CD0072	CD630_00720	SigH; Hfq
CDIF630erm_00139	rplC	50S ribosomal protein L3	-1.29936	*	-1.51441	*	-0.584078		-0.178798		Cellular process	Protein synthesis	Ribosome biogenesis	CD0068	Cytoplasmic	CD0073	CD630_00730	SigH; Hfq
CDIF630erm_00140	rplD	50S ribosomal protein L4	-1.09404		-1.21752		0.609597		-0.0606876		Cellular process	Protein synthesis	Ribosome biogenesis	CD0068	Unknown	CD0074	CD630_00740	SigH; Hfq
CDIF630erm_00141	rplW	50S ribosomal protein L23	-0.258072		0.456892		0.164525		0.202009		Cellular process	Protein synthesis	Ribosome biogenesis	CD0068	Cytoplasmic	CD0075	CD630_00750	SigH
CDIF630erm_00142	rplB	50S ribosomal protein L2	-1.02157		-1.08628		-0.60491		-0.483787		Cellular process	Protein synthesis	Ribosome biogenesis	CD0068	Unknown	CD0076	CD630_00760	SigH; Hfq
CDIF630erm_00143	rpsS	30S ribosomal protein S19	0.187711		2.02929		0.334587		0.126894		Cellular process	Protein synthesis	Ribosome biogenesis	CD0068	Cytoplasmic	CD0077	CD630_00770	SigH
CDIF630erm_00144	rplV	50S ribosomal protein L22	-1.00741		-0.931125		0.784144		-0.218896		Cellular process	Protein synthesis	Ribosome biogenesis	CD0068	Cytoplasmic	CD0078	CD630_00780	SigH; Hfq
CDIF630erm_00145	rpsC	30S ribosomal protein S3	-0.797604		-0.554806		-0.513661		-0.0689751		Cellular process	Protein synthesis	Ribosome biogenesis	CD0068	Cytoplasmic	CD0079	CD630_00790	SigH
CDIF630erm_00146	rplP	50S ribosomal protein L16	-1.68632	*	-1.24458		0.00606934		-1.27339		Cellular process	Protein synthesis	Ribosome biogenesis	CD0068	Cytoplasmic	CD0080	CD630_00800	SigH; ccpA
CDIF630erm_00147	rpmC	50S ribosomal protein L29	-0.235681		0.391831		0.504093		0.723261		Cellular process	Protein synthesis	Ribosome biogenesis	CD0068	Cytoplasmic	CD0080A	CD630_00801	SigH; ccpA
CDIF630erm_00148	rpsQ	30S ribosomal protein S17	-1.70306		-0.20789		-0.383519		0.269461		Cellular process	Protein synthesis	Ribosome biogenesis	CD0068	Cytoplasmic	CD0081	CD630_00810	SigH
CDIF630erm_00149	rplN	50S ribosomal protein L14	-1.15827		-0.41618		0.30034		-0.267512		Cellular process	Protein synthesis	Ribosome biogenesis	CD0068	Cytoplasmic	CD0082	CD630_00820	SigH; ccpA
CDIF630erm_00150	rplX	50S ribosomal protein L24	-0.583132		-0.079559		-1.28251	*	-2.38757		Cellular process	Protein synthesis	Ribosome biogenesis	CD0068	Cytoplasmic	CD0083	CD630_00830	SigH; ccpA
CDIF630erm_00151	rplE	50S ribosomal protein L5	-0.506513		-0.644055		0.116024		-0.067793		Cellular process	Protein synthesis	Ribosome biogenesis	CD0068	Cytoplasmic	CD0084	CD630_00840	SigH
CDIF630erm_00152	rpsZ	30S ribosomal protein S14 type Z	OFF		OFF		0.0230576				Cellular process	Protein synthesis	Ribosome biogenesis	CD0068	Cytoplasmic	CD0084A	CD630_00841	SigH; ccpA
CDIF630erm_00153	rpsH	30S ribosomal protein S8	-0.478055		-0.227657		-0.295198		-0.471418		Cellular process	Protein synthesis	Ribosome biogenesis	CD0068	Cytoplasmic	CD0085	CD630_00850	SigH; ccpA
CDIF630erm_00154	rplF	50S ribosomal protein L6	-1.67373	*	-1.50105	*	-1.18685	*	-0.941486		Cellular process	Protein synthesis	Ribosome biogenesis	CD0068	Cytoplasmic	CD0086	CD630_00860	SigH; ccpA
CDIF630erm_00155	rplR	50S ribosomal protein L18	-0.572476		-0.0914086		-0.0832415		-0.238277		Cellular process	Protein synthesis	Ribosome biogenesis	CD0068	Cytoplasmic	CD0087	CD630_00870	SigH
CDIF630erm_00156	rpsE	30S ribosomal protein S5	-1.20385		-0.608021		0.442047		-0.23146		Cellular process	Protein synthesis	Ribosome biogenesis	CD0068	Cytoplasmic	CD0088	CD630_00880	SigH; ccpA
CDIF630erm_00157	rpmD	50S ribosomal protein L30	-0.695071		-0.125417		-0.670623		-0.213038		Cellular process	Protein synthesis	Ribosome biogenesis	CD0068	Cytoplasmic	CD0088A	CD630_00881	SigH; ccpA
CDIF630erm_00158	rplO	50S ribosomal protein L15	-1.99653	*	-1.58568	*	-0.0244105		0.151193		Cellular process	Protein synthesis	Ribosome biogenesis	CD0068	Unknown	CD0089	CD630_00890	SigH; ccpA
CDIF630erm_00159	secY	Protein translocase subunit SecY	-2.31364		-3.35403	*	0.038929		-1.13265	*	Cellular process	Protein Metabolism	Sec secretion	Other	CytoplasmicMembrane	CD0090	CD630_00900	SigH; ccpA
CDIF630erm_00160	adk	Adenylate kinase (AK) (EC 2.7.4.3) (ATP-AMP transphosphorylase) (ATP:AMP phosphotransferase) (Adenylate monophosphate kinase)	-0.832385	*	-0.15845		-2.04162	*	-4.84007	*	Cellular Processes	DNA and RNA metabolism	Nucleosides and nucleotide metabolism	CD0068	Cytoplasmic	CD0091	CD630_00910	SigH
CDIF630erm_00161	map1	Methionine aminopeptidase (MAP) (MetAP) (EC 3.4.11.18) (Peptidase M)	-0.256556		-0.879548		2.12523	*	1.45434	*	Cellular process	Protein Metabolism	Translation	CD0068	Cytoplasmic	CD0092	CD630_00920	SigH
CDIF630erm_00162	CD630_00930	Ribosomal protein L14E/L6E/L27E-like	1.3311		1.93403		1.11062		0.887746		Cellular process	Protein synthesis	Translation	Other	Unknown	CD0093	CD630_00930	SigH
CDIF630erm_00163	infA	Translation initiation factor IF-1	0.639826		2.52517	*	-1.13848		-0.828		Cellular process	Protein Metabolism	Translation	CD0068	Cytoplasmic	CD0094	CD630_00940	SigH
CDIF630erm_00165	rpsM	30S ribosomal protein S13	-1.16219	*	-0.12515		-0.938907	*	-0.327548		Cellular process	Protein synthesis	Ribosome biogenesis	CD0068	Cytoplasmic	CD0095	CD630_00950	SigH
CDIF630erm_00166	rpsK	30S ribosomal protein S11	-0.909494		-0.607406		0.246892		0.0960651		Cellular process	Protein synthesis	Ribosome biogenesis	CD0068	Cytoplasmic	CD0096	CD630_00960	SigH
CDIF630erm_00167	rpsD	30S ribosomal protein S4	-1.41448	*	-1.29592	*	-1.04754	*	-0.652844		Cellular process	Protein synthesis	Ribosome biogenesis	CD0068	Cytoplasmic	CD0097	CD630_00970	SigH
CDIF630erm_00168	rpoA	DNA-directed RNA polymerase subunit alpha (RNAP subunit alpha) (EC 2.7.7.6) (RNA polymerase subunit alpha) (Transcriptase subunit alpha)	-0.292761		-0.0571902		-0.510278		-0.226008		Cellular Processes	DNA and RNA metabolism	Transcription	CD0068	Cytoplasmic	CD0098	CD630_00980	SigH
CDIF630erm_00169	rplQ	50S ribosomal protein L17	-1.79149		-0.688983		-0.221854		-0.141042		Cellular process	Protein synthesis	Ribosome biogenesis	CD0068	Cytoplasmic	CD0099	CD630_00990	SigH
CDIF630erm_00170	ecfA1	Energy-coupling factor transporter ATP-binding protein EcfA1 (ECF transporter A component EcfA1) (EC 3.6.3.-)	-1.80633		-3.68337	*	0.866673		-1.1086	*	Cellular Processes	Cofactors	Cation transporters	CD0068	CytoplasmicMembrane	CD0100	CD630_01000
CDIF630erm_00171	ecfA2	Energy-coupling factor transporter ATP-binding protein EcfA2 (ECF transporter A component EcfA2) (EC 3.6.3.-)	-2.75351		-3.27987	*	0.608449		-0.960143	*	Cellular Processes	Cofactors	Cation transporters	CD0068	CytoplasmicMembrane	CD0101	CD630_01010
CDIF630erm_00172	cbiQ	Energy-coupling factor transporter transmembrane protein EcfT (ECF transporter T component EcfT)	OFF		OFF	*	-0.304434		-1.36807		Cellular Processes	Cofactors	Cation transporters	CD0068	CytoplasmicMembrane	CD0102	CD630_01020
CDIF630erm_00173	truA1	tRNA pseudouridine synthase A (EC 5.4.99.12) (tRNA pseudouridine(38-40) synthase) (tRNA pseudouridylate synthase I) (tRNA-uridine isomerase I)		*	OFF		ON		1.64967		Cellular process	Protein Metabolism	tRNA metabolism	Other	Unknown	CD0103	CD630_01030
CDIF630erm_00174	rplM	50S ribosomal protein L13	-2.08381	*	-2.06003	*	0.485341		-0.427284		Cellular process	Protein synthesis	Ribosome biogenesis	CD0068	Unknown	CD0104	CD630_01040	SigH
CDIF630erm_00175	rpsI	30S ribosomal protein S9	-1.11109	*	-1.14344	*	0.425679		0.280514		Cellular process	Protein synthesis	Ribosome biogenesis	CD0068	Cytoplasmic	CD0105	CD630_01050	SigH
CDIF630erm_00203	aspC	Aminotransferase (EC 2.6.1.-)	-0.255369		-0.908376		-0.198976		0.694563		Cellular Processes	Amino acid metabolism	Glutamine, glutamate, aspartate and asparagine metabolism	Glutamine, glutamate, aspartate and asparagine metabolism	CytoplasmicMembrane	CD0107	CD630_01070	SpoA; SigB
CDIF630erm_00204	nrdD	Anaerobic ribonucleoside triphosphate reductase (EC 1.17.4.2)	0.134114		-1.47378		2.25837	*	1.8823	*	Cellular Processes	DNA and RNA metabolism	Nucleosides and nucleotide metabolism	Other	Cytoplasmic	CD0108	CD630_01080	SigB
CDIF630erm_00225	dacA	Diadenylate cyclase (DAC) (EC 2.7.7.85) (Cyclic-di-AMP synthase) (c-di-AMP synthase)	-0.706016		-2.04067	*	-0.534737		OFF		Cellular Processes	Regulation and cell signaling	C-di-GMP signaling	CD0110	CytoplasmicMembrane	CD0110	CD630_01100	ccpA
CDIF630erm_00226	CD630_01110	Putative exported protein	OFF	*	-2.53188		0.558266		-0.409443		Miscellaneous	Miscellaneous	Uncharacterized proteins	CD0110	Unknown	CD0111	CD630_01110
CDIF630erm_00227	ptb	Phosphate butyryltransferase (EC 2.3.1.19)	0.419211		1.19696	*	-1.29915		-0.866498		Cellular Processes	Energy metabolism	Branched chain amino acid fermentation	CD0112	Cytoplasmic	CD0112	CD630_01120	ccpA; SpoA; SigB
CDIF630erm_00228	buk	butyrate kinase (BK) (EC 2.7.2.7) (Branched-chain carboxylic acid kinase)	0.256075		0.264926		0.0391321		0.93721		Cellular Processes	Energy metabolism	Branched chain amino acid fermentation	CD0112	Cytoplasmic	CD0113	CD630_01130	ccpA; SpoA; SigB
CDIF630erm_00229	CD630_01140	Putative atp/gtp-binding protein	0.236253		0.0735627		1.06441		0.710176		Miscellaneous	Miscellaneous	Uncharacterized proteins	CD0112	Cytoplasmic	CD0114	CD630_01140	Hfq; SpoA; SigB
CDIF630erm_00230	vorC1	3-methyl-2-oxobutanoate dehydrogenase (ferredoxin), gamma subunit (ferredoxin)	1.48483	*	2.25656	*	-0.746084		-1.08876		Cellular Processes	Energy metabolism	Branched chain amino acid fermentation	CD0112	Unknown	CD0115	CD630_01150	Hfq; SigB
CDIF630erm_00231	vorB1	3-methyl-2-oxobutanoate dehydrogenase (ferredoxin), beta subunit	0.547098		0.804723		0.152286		0.00398791		Cellular Processes	Energy metabolism	Branched chain amino acid fermentation	CD0112	Cytoplasmic	CD0116	CD630_01160	Hfq; SigB
CDIF630erm_00232	vorA1	3-methyl-2-oxobutanoate dehydrogenase (ferredoxin), alpha subunit	0.426619		0.778752		-0.165562		0.0384607		Cellular Processes	Energy metabolism	Branched chain amino acid fermentation	CD0112	Unknown	CD0117	CD630_01170	Hfq; SigB
CDIF630erm_00233	vorA1*	3-methyl-2-oxobutanoate dehydrogenase (ferredoxin), alpha subunit N-terminal region	0.52043		1.54675	*	-0.178303		-0.245485		Cellular Processes	Energy metabolism	Branched chain amino acid fermentation	CD0112	Cytoplasmic	CD0118	CD630_01180	Hfq; SpoA; SigB
CDIF630erm_00234	glmM	Phosphoglucosamine mutase (EC 5.4.2.10)	-0.31547		-0.750763		-0.904088		-0.099548		Cell Envelope	Cell wall	Cell wall biosynthesis	GlmMSU	Cytoplasmic	CD0119	CD630_01190	SigH; Hfq
CDIF630erm_00236	glmS	Glutamine--fructose-6-phosphate aminotransferase [isomerizing] (EC 2.6.1.16) (D-fructose-6-phosphate amidotransferase) (GFAT) (Glucosamine-6-phosphate synthase) (Hexosephosphate aminotransferase) (L-glutamine--D-fructose-6-phosphate amidotransferase)	-0.115514		0.387767		-1.52269	*	-0.815447		Cell Envelope	Cell wall	Cell wall biosynthesis	GlmMSU	Cytoplasmic	CD0120	CD630_01200	SigH; SigB
CDIF630erm_00237	CD630_01210	Thiosulfate sulfurtransferase (EC 2.8.1.1)			OFF		ON		0.224827		Cellular Processes	Cofactors	Sulfur Metabolism	Other	Unknown	CD0121	CD630_01210
CDIF630erm_00239	murA	UDP-N-acetylglucosamine 1-carboxyvinyltransferase (EC 2.5.1.7) (Enoylpyruvate transferase) (UDP-N-acetylglucosamine enolpyruvyl transferase) (EPT)	-0.184501		-0.677167		0.332328		0.368425		Cell Envelope	Cell wall	Cell wall biosynthesis	Mur	Cytoplasmic	CD0123	CD630_01230	SigB
CDIF630erm_00243	mreB1	Rod shape-determining protein MreB	-0.37615		-0.320142		1.21112		1.09315		Cellular Processes	Cell division and cell death	Cell division	Other	Cytoplasmic	CD0127	CD630_01270
CDIF630erm_00244	fabZ	3-hydroxyacyl-[acyl-carrier-protein] dehydratase FabZ (EC 4.2.1.59) ((3R)-hydroxymyristoyl-[acyl-carrier-protein] dehydratase) ((3R)-hydroxymyristoyl-ACP dehydrase) (Beta-hydroxyacyl-ACP dehydratase)	-1.19661		-0.289506		-1.71386		-0.591062		Cellular Processes	Fatty Acids	Fatty Acids	Other	Cytoplasmic	CD0128	CD630_01280
CDIF630erm_00247	metK	S-adenosylmethionine synthase (AdoMet synthase) (EC 2.5.1.6) (MAT) (Methionine adenosyltransferase)	0.485017		0.73602		-0.743872		-0.249108		Cellular Processes	Amino acid metabolism	Lysine, threonine, methionine and cysteine metabolism	Lysine, threonine, methionine and cysteine metabolism	Cytoplasmic	CD0130	CD630_01300	c-di-GMP; SigB
CDIF630erm_00258	cutC	Copper homeostasis protein CutC			OFF		ON		-6.43821		Cellular Processes	Stress Response and virulence	Universal stress response	Other	Cytoplasmic	CD0141	CD630_01410
CDIF630erm_00259	hpf	Ribosome hibernation promoting factor (HPF)	-0.606013		-0.34303		-0.643079		-0.323189		Cellular process	Protein Metabolism	Translation	CD0142	Cytoplasmic	CD0142	CD630_01420	SigH; SpoA
CDIF630erm_00260	secA1	Protein translocase subunit SecA 1	-0.128269		-1.05988		0.134236		0.984494	*	Cellular process	Protein Metabolism	Sec secretion	Other	Cytoplasmic	CD0143	CD630_01430
CDIF630erm_00262	prfB	Peptide chain release factor 2 (RF-2)	OFF				OFF		OFF		Cellular process	Protein Metabolism	Translation	CD0142	Cytoplasmic	CD0144	CD630_01440
CDIF630erm_00263	CD630_01450	Putative S1 RNA-binding domain-containing protein	-0.815055		-1.06275		1.07639		2.39239	*	Cellular Processes	Regulation and cell signaling	Transcriptional regulators	Other	Cytoplasmic	CD0145	CD630_01450	SigB
CDIF630erm_00264	CD630_01460	putative metal-dependent hydrolase	-1.47452		-2.13335	*	-0.937417		-1.00634		Cellular Processes	Amino acid metabolism	Amino acid metabolism	Other	Cytoplasmic	CD0146	CD630_01460
CDIF630erm_00267	CD630_01480	Uncharacterized protein	OFF	*	OFF		2.43208		1.09738		Miscellaneous	Miscellaneous	Uncharacterized proteins	Other	Cytoplasmic	CD0148	CD630_01480	SigH; SpoA; c-di-GMP
CDIF630erm_00268	tsaE	tRNA threonylcarbamoyladenosine biosynthesis protein TsaE	-0.282976		-1.27311		1.73213	*	0.639224		Cellular process	Protein synthesis	tRNA metabolism	CD0149	Cytoplasmic	CD0149	CD630_01490	SigB
CDIF630erm_00269	tsaB	tRNA threonylcarbamoyladenosine biosynthesis protein TsaB	1.76626		0.473149		-1.50031				Cellular process	Protein synthesis	tRNA metabolism	CD0149	Unknown	CD0150	CD630_01500	SigB
CDIF630erm_00270	rimI	Putative alanine acetyltransferase, ribosomal family (EC 2.3.1.128)			ON				ON		Cellular process	Protein synthesis	Ribosome biogenesis	Other	Cytoplasmic	CD0151	CD630_01510	SigB
CDIF630erm_00271	tsaD	tRNA N6-adenosine threonylcarbamoyltransferase (EC 2.3.1.234) (N6-L-threonylcarbamoyladenine synthase) (t(6)A synthase) (t(6)A37 threonylcarbamoyladenosine biosynthesis protein TsaD) (tRNA threonylcarbamoyladenosine biosynthesis protein TsaD)	-0.884317		-0.186819		0.297051		1.15127		Cellular process	Protein synthesis	tRNA metabolism	CD0149	Cytoplasmic	CD0152	CD630_01520	SigH; SigB
CDIF630erm_00272	hpdB	4-hydroxyphenylacetate decarboxylase large subunit (EC 4.1.1.83) (4-hydroxyphenylacetate decarboxylase glycyl radical subunit) (p-hydroxyphenylacetate decarboxylase large subunit)	0.303829		1.398		0.974738		2.40487	*	Cellular Processes	Amino acid metabolism	Amino acid metabolism	Other	Cytoplasmic	CD0153	CD630_01530	SigB
CDIF630erm_00273	hpdC	4-hydroxyphenylacetate decarboxylase small subunit (EC 4.1.1.83) (p-hydroxyphenylacetate decarboxylase small subunit)			OFF				OFF		Cellular Processes	Amino acid metabolism	Amino acid metabolism	Other	Unknown	CD0154	CD630_01540	SigB
CDIF630erm_00278	CD630_01590	Putative enzyme, glyoxalase family					OFF				Miscellaneous	Miscellaneous	Uncharacterized proteins	Other	Cytoplasmic	CD0159	CD630_01590
CDIF630erm_00288	CD630_01670	Transcriptional regulator, sigma-54-dependent					ON		ON		Cellular Processes	Stress Response and virulence	RpoN dependent stress reponse	Other	Cytoplasmic	CD0167	CD630_01670	RpoN (EBP)
CDIF630erm_00289	CD630_01680	Putative cyclic nucleotide-binding protein	0.838446		-1.14532		2.3802		-0.0397865		Cellular Processes	DNA and RNA metabolism	Nucleosides and nucleotide metabolism	Other	Cytoplasmic	CD0168	CD630_01680
CDIF630erm_00291	CD630_01700	ABC-type transport system, ATP-binding protein	-1.02339		-2.02034		1.68003	*	1.62582	*	Cellular Processes	Stress Response and virulence	Multi-drug transport	Other	Cytoplasmic	CD0170	CD630_01700
CDIF630erm_00292	rex	Redox-sensing transcriptional repressor Rex	0.0989219		1.03209		0.0500393		0.590054		Cellular Processes	Stress Response and virulence	Nutrient limitation	Other	Cytoplasmic	CD0171	CD630_01710
CDIF630erm_00296	cooS	Carbon monoxide dehydrogenase (NAD), catalytic subunit (EC 1.2.7.4)	0.931492		1.79914	*	-0.971091		0.290103		Cellular Processes	CO2 fixation	Acetyl-CoA-Wood-Ljungdahl Pathway	CD0174	Cytoplasmic	CD0174	CD630_01740	SpoA; c-di-GMP; SigB
CDIF630erm_00297	CD630_01750	Carbon monoxide dehydrogenase (NAD), electron transport subunit (EC 1.2.7.4)	0.837645		2.58306	*	OFF		OFF		Cellular Processes	CO2 fixation	Acetyl-CoA-Wood-Ljungdahl Pathway	CD0174	CytoplasmicMembrane	CD0175	CD630_01750	c-di-GMP
CDIF630erm_00298	CD630_01760	Carbon monoxide dehydrogenase (NAD), NADH dehydrogenase subunit (EC 1.2.7.4)	1.46638		2.05218	*	-0.123417		-0.150148		Cellular Processes	CO2 fixation	Acetyl-CoA-Wood-Ljungdahl Pathway	CD0174	Cytoplasmic	CD0176	CD630_01760
CDIF630erm_00299	cfa	Cyclopropane-fatty-acyl-phospholipid synthase (EC 2.1.1.79)	-0.254897		-0.846769		0.414447		0.970518		Cell Envelope	Cell membrane	Cell membrane	Other	Cytoplasmic	CD0177	CD630_01770	ccpA
CDIF630erm_00301	gluD	Glutamate dehydrogenase	0.471619		0.508058		-1.78239		-2.92238		Cellular Processes	Cofactors	Nitrogen and sulfur metabolism	Other	Cytoplasmic	CD0179	CD630_01790	ccpA; Hfq; SpoA; SigB
CDIF630erm_00304	CD630_01830	putative NLPC / P60-type endopeptidase	0.30143		-2.11074		OFF		OFF		Cell Envelope	Cell wall	Peptidoglycan turnover	Other	Extracellular	CD0183	CD630_01830	SigB
CDIF630erm_00305	pyrB	Aspartate carbamoyltransferase (EC 2.1.3.2) (Aspartate transcarbamylase) (ATCase)	-0.555494		0.221884		-3.64442		-3.37852		Cellular Processes	DNA and RNA metabolism	Nucleosides and nucleotide metabolism	CD0184	Cytoplasmic	CD0184	CD630_01840	Hfq
CDIF630erm_00306	pyrK	Dihydroorotate dehydrogenase electron transfer subunit (EC 1.3.3.1)	-0.417084		-0.575598		1.75078	*	0.981728	*	Cellular Processes	DNA and RNA metabolism	Nucleosides and nucleotide metabolism	CD0184	Cytoplasmic	CD0185	CD630_01850	SigB
CDIF630erm_00307	pyrD	Dihydroorotate dehydrogenase B (NAD(+)), catalytic subunit (DHOD B) (DHODase B) (DHOdehase B) (EC 1.3.1.14) (Dihydroorotate oxidase B) (Orotate reductase (NADH))	0.250397		-1.74393		2.21442	*	1.19242	*	Cellular Processes	DNA and RNA metabolism	Nucleosides and nucleotide metabolism	CD0184	Cytoplasmic	CD0186	CD630_01860	SigB
CDIF630erm_00308	pyrE	Orotate phosphoribosyltransferase (OPRT) (OPRTase) (EC 2.4.2.10)	-0.631181		0.0697492		-1.59399	*	-2.35228		Cellular Processes	DNA and RNA metabolism	Nucleosides and nucleotide metabolism	CD0184	Cytoplasmic	CD0187	CD630_01870	SigB
CDIF630erm_00309	CD630_01880	2-dehydropantoate 2-reductase (EC 1.1.1.169) (Ketopantoate reductase)	1.5736		0.637978		1.3364		0.65556		Cellular Processes	Cofactors	Pantothenate and coenzyme A	Other	Cytoplasmic	CD0188	CD630_01880	SigB
CDIF630erm_00310	CD630_01890	Transcriptional regulator, LysR family	OFF		OFF		OFF		OFF		Cellular Processes	Regulation and cell signaling	Transcriptional regulators	Other	Cytoplasmic	CD0189	CD630_01890
CDIF630erm_00312	CD630_01910	putative 8-oxoguanine-DNA-glycosylase	-0.239676		-0.884674		1.95636	*	1.72577	*	Cellular Processes	DNA and RNA metabolism	DNA metabolism	Other	Cytoplasmic	CD0191	CD630_01910	c-di-GMP
CDIF630erm_00313	cls	Cardiolipin synthase (CL synthase) (EC 2.7.8.-)			OFF				-0.887157		Cellular Processes	Fatty Acids	Phospholipid metabolism	Other	CytoplasmicMembrane	CD0192	CD630_01920
CDIF630erm_00314	groS	10 kDa chaperonin (GroES protein) (Protein Cpn10)	0.213563		0.00124902		-0.841174		-1.50459		Cellular Processes	Stress Response and virulence	Universal stress response	280841	Cytoplasmic	CD0193	CD630_01930
CDIF630erm_00315	groL	60 kDa chaperonin (GroEL protein) (Protein Cpn60)	-0.981111		-1.81728	*	-1.31331		-2.00759	*	Cellular Processes	Stress Response and virulence	Universal stress response	280841	Cytoplasmic	CD0194	CD630_01940	SigH; Hfq
CDIF630erm_00316	larB	Ni2+ loading protein for larE	-1.69219		-1.9537		-1.43799				Cellular Processes	Carbohydrate metabolism	Lactate fermentation	Other	Cytoplasmic	CD0195	CD630_01950
CDIF630erm_00317	larC	Ni2+ carrier LarC			OFF		ON		1.61526		Cellular Processes	Carbohydrate metabolism	Lactate fermentation	Other	Cytoplasmic	#N/A	#REF!
CDIF630erm_00320	guaA	GMP synthase [glutamine-hydrolyzing] (EC 6.3.5.2) (GMP synthetase) (Glutamine amidotransferase)	-0.194752		-0.438815		-1.26393	*	-0.892227		Cellular Processes	DNA and RNA metabolism	Nucleosides and nucleotide metabolism	Other	Cytoplasmic	CD0198	CD630_01980
CDIF630erm_00321	CD630_01990	putative 5*-nucleotidase	OFF				OFF				Cellular Processes	DNA and RNA metabolism	DNA repair	Other	Unknown	CD0199	CD630_01990
CDIF630erm_00326	CD630_02040	Phosphodiesterase			-0.168664		ON		0.0756553		Cellular Processes	Regulation and cell signaling	C-di-GMP signaling	Other	CytoplasmicMembrane	CD0204	CD630_02040
CDIF630erm_00331	CD630_02090	Putative tagatose 6-phosphate kinase	OFF		-0.264361	*	OFF		-4.01462		Cellular Processes	Carbohydrate metabolism	Galactose	Other	Cytoplasmic	CD0209	CD630_02090	SigH; Hfq; SigD; SpoA; SigB
CDIF630erm_00332	CD630_02100	Putative hydrolase, HAD superfamily, subfamily IA (EC 3.1.3.-)		*	OFF		ON		1.25254		Miscellaneous	Miscellaneous	Uncharacterized proteins	Other	Cytoplasmic	CD0210	CD630_02100	SpoA; SigB
CDIF630erm_00333	licC	CTP:phosphocholine cytidylyltransferase			OFF		2.26335		1.99371		Cell Envelope	Cell membrane	Cell membrane	280843	Cytoplasmic	CD0211	CD630_02110	SigD; c-di-GMP
CDIF630erm_00334	CD630_02120	putative alkaline-phosphatase	-1.15945		-1.66786		1.397	*	1.65205	*	Cell Envelope	Cell membrane	Cell membrane	280843	Unknown	CD0212	CD630_02120	SigH; SigD; c-di-GMP
CDIF630erm_00337	CD630_02150	Transposase IS200/IS605-like OrfA		*	ON		ON		ON		Cellular Processes	Stress Response and virulence	Prophages	Other	Cytoplasmic	CD0215	CD630_02150
CDIF630erm_00340	purE	N5-carboxyaminoimidazole ribonucleotide mutase (N5-CAIR mutase) (EC 5.4.99.18) (5-(carboxyamino)imidazole ribonucleotide mutase)	-1.59721	*	-0.642166		-1.45485	*	-2.38664		Cellular Processes	DNA and RNA metabolism	Nucleosides and nucleotide metabolism	CD0218	Cytoplasmic	CD0218	CD630_02180
CDIF630erm_00341	purC	Phosphoribosylaminoimidazole-succinocarboxamide synthase (EC 6.3.2.6) (SAICAR synthetase)	-0.90611		-0.322862		-0.671982		0.756184		Cellular Processes	DNA and RNA metabolism	Nucleosides and nucleotide metabolism	CD0218	Cytoplasmic	CD0219	CD630_02190
CDIF630erm_00342	purF	Amidophosphoribosyltransferase (ATase) (EC 2.4.2.14) (Glutamine phosphoribosylpyrophosphate amidotransferase) (GPATase)	-0.534449		-0.733419		-1.37338	*	-1.23566	*	Cellular Processes	DNA and RNA metabolism	Nucleosides and nucleotide metabolism	CD0218	Cytoplasmic	CD0220	CD630_02200
CDIF630erm_00343	purG	Phosphoribosylformylglycinamidine cyclo-ligase (EC 6.3.3.1) (AIR synthase) (AIRS) (Phosphoribosyl-aminoimidazole synthetase)	-0.255952		0.462128		-1.31049		0.328684		Cellular Processes	DNA and RNA metabolism	Nucleosides and nucleotide metabolism	CD0218	Cytoplasmic	CD0221	CD630_02210
CDIF630erm_00344	purN	Phosphoribosylglycinamide formyltransferase (EC 2.1.2.2) (5'-phosphoribosylglycinamide transformylase) (GAR transformylase) (GART)			OFF		0.0330758		1.13403		Cellular Processes	DNA and RNA metabolism	Nucleosides and nucleotide metabolism	CD0218	Cytoplasmic	CD0222	CD630_02220
CDIF630erm_00345	purH	Bifunctional purine biosynthesis protein PurH [Includes: Phosphoribosylaminoimidazolecarboxamide formyltransferase (EC 2.1.2.3) (AICAR transformylase); IMP cyclohydrolase (EC 3.5.4.10) (ATIC) (IMP synthase) (Inosinicase)]	-0.459239		-1.2684		-1.91888		-3.21467	*	Cellular Processes	DNA and RNA metabolism	Nucleosides and nucleotide metabolism	CD0218	Cytoplasmic	CD0223	CD630_02230
CDIF630erm_00346	purD	Phosphoribosylamine--glycine ligase (EC 6.3.4.13) (GARS) (Glycinamide ribonucleotide synthetase) (Phosphoribosylglycinamide synthetase)	-0.731731		-0.690026		-0.754924		-0.647291		Cellular Processes	DNA and RNA metabolism	Nucleosides and nucleotide metabolism	CD0218	Cytoplasmic	CD0224	CD630_02240
CDIF630erm_00347	purL	Phosphoribosylformylglycinamidine synthase (EC 6.3.5.3)	-0.0129471		0.352978		-0.922054		0.908958		Cellular Processes	DNA and RNA metabolism	Nucleosides and nucleotide metabolism	CD0218	Cytoplasmic	CD0225	CD630_02250
CDIF630erm_00348	CD630_02260	Putative lytic transglycosylase	2.82968		3.28601		1.73301		2.71775		Cell Envelope	Adhesion and motility	Flagellum	F1 (late stage)	Unknown	CD0226	CD630_02260	SigH; SigD; SpoA; c-di-GMP; SigB
CDIF630erm_00349	CD630_02270	Uncharacterized protein	-0.726324		OFF		-0.451458		-0.828912		Cell Envelope	Adhesion and motility	Flagellum	F1 (late stage)	Unknown	CD0227	CD630_02270	SigH; SigD; c-di-GMP
CDIF630erm_00350	fliN	Flagellar motor switch protein FliN	-0.0343352		-0.268505		2.49277	*	1.18884		Cell Envelope	Adhesion and motility	Flagellum	F1 (late stage)	Cytoplasmic	CD0228	CD630_02280	SigH; SigD; c-di-GMP; SigB
CDIF630erm_00351	flgM	Negative regulator of flagellin synthesis (Anti-sigma-d factor)	0.676434		-0.445024		-0.726173		-2.44077		Cell Envelope	Adhesion and motility	Flagellum	F1 (late stage)	Unknown	CD0229	CD630_02290	SigH; SigD; c-di-GMP; SigB
CDIF630erm_00352	CD630_02300	Putative flagellar biosynthesis protein	-4.05011		-2.68591		2.11373	*	1.01533		Cell Envelope	Adhesion and motility	Flagellum	F1 (late stage)	Cytoplasmic	CD0230	CD630_02300	SigH; SigD; c-di-GMP; SigB
CDIF630erm_00353	flgK	Flagellar hook-associated protein 1 (HAP1)	0.558228		-3.61417	*	1.27235		-0.214584		Cell Envelope	Adhesion and motility	Flagellum	F1 (late stage)	Unknown	CD0231	CD630_02310	SigH; SigD; c-di-GMP; SigB
CDIF630erm_00354	flgL	Flagellar hook-associated protein FlgL (Or HAP3)	-0.267465		-2.80319	*	0.125126		-0.472358		Cell Envelope	Adhesion and motility	Flagellum	F1 (late stage)	Extracellular	CD0232	CD630_02320	SigH; SigD; c-di-GMP; SigB
CDIF630erm_00355	fliW	Flagellar assembly factor FliW	-0.457131		-0.521859		0.958688	*	0.563811		Cell Envelope	Adhesion and motility	Flagellum	F1 (late stage)	Cytoplasmic	CD0233	CD630_02330	SigH; SigD; SpoA; c-di-GMP; SigB
CDIF630erm_00356	csrA	Translational regulator CsrA	0.359672		2.30969		-1.03964		0.257487		Cell Envelope	Adhesion and motility	Flagellum	F1 (late stage)	Unknown	CD0234	CD630_02340	SigH; SigD; c-di-GMP; SigB
CDIF630erm_00357	fliS1	Flagellar secretion chaperone FliS	-1.28183		-1.94833		1.11452		0.56728		Cell Envelope	Adhesion and motility	Flagellum	F1 (late stage)	Cytoplasmic	CD0235	CD630_02350	SigH; SigD; c-di-GMP; SigB
CDIF630erm_00358	fliS2	Flagellar protein FliS2	-0.313062		OFF		3.40809		2.86652		Cell Envelope	Adhesion and motility	Flagellum	F1 (late stage)	Unknown	CD0236	CD630_02360	SigH; SigD; c-di-GMP; SigB
CDIF630erm_00359	fliD	Flagellar hook-associated protein 2 (HAP2) (Flagellar cap protein)	0.379395		-3.09366	*	-1.97554		-3.23523	*	Cell Envelope	Adhesion and motility	Flagellum	F1 (late stage)	Extracellular	CD0237	CD630_02370	SigH; SigD; c-di-GMP; SigB
CDIF630erm_00360	fliT	flagellar protein FliT	-2.31083		-1.81085		2.5912		1.49151		Cell Envelope	Adhesion and motility	Flagellum	F1 (late stage)	Cytoplasmic	CD0238	CD630_02380	SigH; SigD; c-di-GMP
CDIF630erm_00361	fliC	Flagellin	0.826517		0.373705		2.75101	*	2.11929	*	Cell Envelope	Adhesion and motility	Flagellum	F1 (late stage)	Unknown	CD0239	CD630_02390	SigH; ccpA; SigD; SpoA; c-di-GMP; SigB
CDIF630erm_00362	CD630_02400	flagellin N-acetylglucosamine transferase	-1.74962		-2.44074		2.20564	*	1.4265	*	Cell Envelope	Adhesion and motility	Flagellum	F1 (late stage)	Cytoplasmic	CD0240	CD630_02400	SigH; SigD; c-di-GMP
CDIF630erm_00363	CD630_02410	Flagella glycosylation phosphoserine phosphatase (EC 3.1.3.3)	-1.35983		-1.82489		2.3417	*	0.763017		Cell Envelope	Adhesion and motility	Flagellum	F2 (gylcan biosyn)	Cytoplasmic	CD0241	CD630_02410	SigH; SigD; SpoA; c-di-GMP
CDIF630erm_00364	CD630_02420	flagellin phosphothreonine transferase	-0.88711		-2.22949	*	1.96282	*	1.06017	*	Cell Envelope	Adhesion and motility	Flagellum	F2 (gylcan biosyn)	Cytoplasmic	CD0242	CD630_02420	SigH; SigD; SpoA; c-di-GMP
CDIF630erm_00365	CD630_02430	flagellin methyltransferase	-1.85195		-2.72959		2.26263	*	1.11826	*	Cell Envelope	Adhesion and motility	Flagellum	F2 (gylcan biosyn)	Cytoplasmic	CD0243	CD630_02430	SigH; SigD; SpoA; c-di-GMP
CDIF630erm_00366	CD630_02440	flagellin phosphotransferase	-1.17793		-3.05445	*	2.25025	*	1.10505	*	Cell Envelope	Adhesion and motility	Flagellum	F2 (gylcan biosyn)	Cytoplasmic	CD0244	CD630_02440	SigH; SigD; SpoA; c-di-GMP
CDIF630erm_00368	flgB	Flagellar basal-body rod protein FlgB					ON				Cell Envelope	Adhesion and motility	Flagellum	F3 (early stage)	Unknown	CD0245	CD630_02450	SigD; SpoA; c-di-GMP; SigB
CDIF630erm_00369	flgC	Flagellar basal-body rod protein FlgC		*	ON	*	ON		ON		Cell Envelope	Adhesion and motility	Flagellum	F3 (early stage)	Cytoplasmic	CD0246	CD630_02460	SigH; SigD; c-di-GMP; SigB
CDIF630erm_00370	fliE	Flagellar hook-basal body complex protein FliE	ON				ON		ON		Cell Envelope	Adhesion and motility	Flagellum	F3 (early stage)	Cytoplasmic	CD0247	CD630_02470	SigH; SigD; SpoA; c-di-GMP; SigB
CDIF630erm_00371	fliF	Flagellar M-ring protein	-1.67346		-3.1069	*	2.39698	*	1.29148	*	Cell Envelope	Adhesion and motility	Flagellum	F3 (early stage)	CytoplasmicMembrane	CD0248	CD630_02480	SigH; SigD; SpoA; c-di-GMP; SigB
CDIF630erm_00372	fliG	Flagellar motor switch protein FliG	-1.37759		-2.69242		2.40182	*	1.0762	*	Cell Envelope	Adhesion and motility	Flagellum	F3 (early stage)	Cytoplasmic	CD0249	CD630_02490	SigH; SigD; SpoA; c-di-GMP; SigB
CDIF630erm_00373	fliH	Flagellar assembly protein FliH	-0.915554		-1.88708		2.5679	*	1.43009	*	Cell Envelope	Adhesion and motility	Flagellum	F3 (early stage)	Cytoplasmic	CD0250	CD630_02500	SigH; ccpA; SigD; SpoA; c-di-GMP; SigB
CDIF630erm_00374	fliI	ATP synthase subunit beta FliI (EC 3.6.3.14)	OFF		OFF		4.7064		2.58426		Cell Envelope	Adhesion and motility	Flagellum	F3 (early stage)	Cytoplasmic	CD0251	CD630_02510	SigH; ccpA; SigD; SigE; SpoA; c-di-GMP; SigB
CDIF630erm_00376	fliK	Flagellar hook-length control protein FliK	OFF		OFF		OFF		OFF		Cell Envelope	Adhesion and motility	Flagellum	F3 (early stage)	Unknown	CD0253	CD630_02530	SigH; SigD; SpoA; c-di-GMP
CDIF630erm_00378	flgE	Flagellar basal body protein	-0.140957		-0.728862		3.0442	*	2.01671	*	Cell Envelope	Adhesion and motility	Flagellum	F3 (early stage)	Extracellular	CD0255	CD630_02550	SigH; SigD; c-di-GMP
CDIF630erm_00379	FlbD	Flagellar protein FlbD	-0.0632279		0.00614145		0.322249		0.338467		Cell Envelope	Adhesion and motility	Flagellum	F3 (early stage)	Unknown	CD0255A	CD630_02551	SigD; SpoA; c-di-GMP
CDIF630erm_00380	motA	Flagellar motor rotation protein MotA	-2.00906		-3.73686	*	1.36042		-0.618976		Cell Envelope	Adhesion and motility	Flagellum	F3 (early stage)	CytoplasmicMembrane	CD0256	CD630_02560	SigH; SigD; c-di-GMP
CDIF630erm_00381	motB	Flagellar motor rotation protein MotB (Chemotaxis protein MotB)	OFF		OFF		-0.514695		-2.64064		Cell Envelope	Adhesion and motility	Flagellum	F3 (early stage)	CytoplasmicMembrane	CD0257	CD630_02570	SigH; SigD; SpoA; c-di-GMP
CDIF630erm_00382	fliL	Flagellar protein FliL	0.608433		-4.73718		0.19682		-0.998786		Cell Envelope	Adhesion and motility	Flagellum	F3 (early stage)	Unknown	CD0258	CD630_02580	SigH; SigD; c-di-GMP
CDIF630erm_00383	fliZ	Flagellar protein FliZ			OFF		ON		OFF		Cell Envelope	Adhesion and motility	Flagellum	F3 (early stage)	Unknown	CD0259	CD630_02590	SigD; SpoA; c-di-GMP
CDIF630erm_00384	fliP	Flagellar biosynthetic protein FliP	OFF		OFF		0.27843		-0.71828		Cell Envelope	Adhesion and motility	Flagellum	F3 (early stage)	CytoplasmicMembrane	CD0260	CD630_02600	SigH; SigD; c-di-GMP
CDIF630erm_00387	flhA	Flagellar biosynthesis protein FlhA	-1.27896		-2.03601		2.70255	*	2.01658	*	Cell Envelope	Adhesion and motility	Flagellum	F3 (early stage)	CytoplasmicMembrane	CD0263	CD630_02630	SigH; SigD; c-di-GMP
CDIF630erm_00388	flhF	Flagellar biosynthesis regulator FlhF (Flagella-associated GTP-binding protein)	-3.88693		-4.73406		2.95546	*	1.2024	*	Cell Envelope	Adhesion and motility	Flagellum	F3 (early stage)	CytoplasmicMembrane	CD0264	CD630_02640	SigH; SigD; c-di-GMP
CDIF630erm_00389	flhG	flagellar number regulator FlhG	OFF		OFF		1.67388		0.337645		Cell Envelope	Adhesion and motility	Flagellum	F3 (early stage)	CytoplasmicMembrane	CD0265	CD630_02650	SigH; SigD; c-di-GMP
CDIF630erm_00390	fliA	RNA polymerase sigma-28factor for flagellar operon									Cell Envelope	Adhesion and motility	Flagellum	F3 (early stage)	Cytoplasmic	CD0266	CD630_02660	SigH; SigD; c-di-GMP
CDIF630erm_00391	CD630_02670	Putative flagellar protein	OFF		OFF		1.94206		1.12359		Cell Envelope	Adhesion and motility	Flagellum	F3 (early stage)	Cytoplasmic	CD0267	CD630_02670	SigH; SigD; c-di-GMP
CDIF630erm_00392	flgG1	flagellar basal-body rod protein FlgG	1.61079		-1.03399		0.622179		-0.128013		Cell Envelope	Adhesion and motility	Flagellum	F3 (early stage)	Extracellular	CD0268	CD630_02680	SigH; SigD; c-di-GMP
CDIF630erm_00393	flgG	flagellar basal body rod protein FlgG	-0.448791		-1.39523		1.34493		1.56706		Cell Envelope	Adhesion and motility	Flagellum	F3 (early stage)	Extracellular	CD0269	CD630_02690	SigH; SigD; c-di-GMP; SigB
CDIF630erm_00394	fliM	Flagellar motor switch protein FliM	-0.764266		-2.18591	*	2.19174	*	1.2193	*	Cell Envelope	Adhesion and motility	Flagellum	F3 (early stage)	CytoplasmicMembrane	CD0270	CD630_02700	SigH; SigD; c-di-GMP; SigB
CDIF630erm_00395	fliN1	Flagellar motor switch phosphatase FliN1 (EC 3.-.-.-)	-1.47505		-1.73465		1.5621		0.0866051		Cell Envelope	Adhesion and motility	Flagellum	F3 (early stage)	CytoplasmicMembrane	CD0271	CD630_02710	SigH; ccpA; SigD; c-di-GMP; SigB
CDIF630erm_00396	CD630_02720	Uncharacterized protein	0.217115		OFF		0.528825		0.186201		Cell Envelope	Adhesion and motility	Flagellum	F3 (early stage)	Unknown	CD0272	CD630_02720	SigD; c-di-GMP; SigB
CDIF630erm_00397	htpG	Heat shock protein 90 (Heat shock protein HtpG)(High temperature protein G)	-0.698519		-1.26596		0.64118		1.25523	*	Cellular process	Protein folding and degradation	Protein folding and degradation	Other	Cytoplasmic	CD0273	CD630_02730	SigD; c-di-GMP
CDIF630erm_00398	CD630_02740	Putative iron-containing alcohol dehydrogenase (EC 1.1.1.-)	0.323113		0.940586		OFF		-1.67607		Cellular Processes	Central energy metabolism	Fermentation	Other	Cytoplasmic	CD0274	CD630_02740
CDIF630erm_00401	CD630_02770	Uncharacterized protein					ON		ON		Miscellaneous	Miscellaneous	Uncharacterized proteins	Other	Unknown	CD0277	CD630_02770
CDIF630erm_00403	CD630_02790	Pyridoxamine 5'-phosphate oxidase family protein	2.22103		2.58905	*	-0.772066		-0.635784		Cellular Processes	Cofactors	Pyridoxine	Other	Cytoplasmic	CD0279	CD630_02790	ccpA
CDIF630erm_00404	CD630_02791	Uncharacterized protein			ON						Miscellaneous	Miscellaneous	Uncharacterized proteins	Other	Extracellular	CD0279.1	CD630_02791
CDIF630erm_00405	CD630_02810	Uncharacterized protein			OFF				OFF		Miscellaneous	Miscellaneous	Uncharacterized proteins	Other	Unknown	CD0281	CD630_02810
CDIF630erm_00407	CD630_02830	Transcription antiterminator, PTS operon regulator	OFF		-0.786972		2.01378	*	1.84856		Cellular Processes	Carbohydrate metabolism	Mannose	Other	Cytoplasmic	CD0283	CD630_02830	SpoA; RpoN (EBP)
CDIF630erm_00408	CD630_02840	PTS system, mannose-type IIA component					ON		ON		Cellular Processes	Carbohydrate metabolism	Mannose	CD0284	Cytoplasmic	CD0284	CD630_02840	RpoN (Target); SigB
CDIF630erm_00409	CD630_02850	PTS system, mannose-type IIB component	0.272526		0.997674		1.16192		0.202256		Cellular Processes	Carbohydrate metabolism	Mannose	CD0284	Cytoplasmic	CD0285	CD630_02850	SpoA; c-di-GMP; RpoN (Target)
CDIF630erm_00411	CD630_02870	PTS system, mannose-type IIB component	-0.50988		-0.15539		-1.62896		-1.20058		Cellular Processes	Carbohydrate metabolism	Mannose	CD0284	Cytoplasmic	CD0287	CD630_02870	RpoN (Target)
CDIF630erm_00413	CD630_02890	PTS system, mannose-type IID component	OFF								Cellular Processes	Carbohydrate metabolism	Mannose	CD0284	CytoplasmicMembrane	CD0289	CD630_02890	RpoN (Target)
CDIF630erm_00414	CD630_02900	putative L-2-amino-thiazoline-4-carboxylic acid hydrolase	0.200045		0.909661		-0.281158		0.599512		Miscellaneous	Miscellaneous	Uncharacterized proteins	Other	Cytoplasmic	CD0290	CD630_02900	SigB
CDIF630erm_00415	CD630_02910	Putative peptidase, M20A family (EC 3.5.1.-)					ON				Cellular process	Protein folding and degradation	Peptidases	Other	Cytoplasmic	CD0291	CD630_02910
CDIF630erm_00420	CD630_02950	Putative iron-sulfur-binding protein	-0.0299782		-0.56721		0.81209		1.13939		Cellular Processes	Cofactors	Iron-sulfur cluster	Other	Unknown	CD0295	CD630_02950	ccpA
CDIF630erm_00423	rbsR	Transcriptional regulator, LacI family	-0.458724		1.80578		OFF		OFF		Cellular Processes	Carbohydrate metabolism	Ribose	CD0298	Cytoplasmic	CD0298	CD630_02980
CDIF630erm_00424	rbsK	Ribokinase (RK) (EC 2.7.1.15)	-0.49514		-0.272887		0.369376		-0.0629291		Cellular Processes	Carbohydrate metabolism	Ribose	CD0298	Cytoplasmic	CD0299	CD630_02990
CDIF630erm_00425	rbsB	ABC-type transport system, ribose-specific extracellular solute-binding protein	-1.75348		-0.357034		-1.96694		-1.85353	*	Cellular Processes	Carbohydrate metabolism	Ribose	CD0298	Unknown	CD0300	CD630_03000	SpoA
CDIF630erm_00426	rbsA	ABC-type transport system, ribose-specific ATP-binding protein (EC 3.6.3.-)			-0.371921				-0.435787		Cellular Processes	Carbohydrate metabolism	Ribose	CD0298	CytoplasmicMembrane	CD0301	CD630_03010	SpoA
CDIF630erm_00428	argE	Acetylornithine deacetylase ArgE (EC 3.5.1.16)							OFF		Cellular Processes	Amino acid metabolism	Amino acid metabolism	280856	Unknown	CD0303	CD630_03030	SpoA
CDIF630erm_00429	CD630_03040	class I glutamine amidotransferase-like protein	-1.78377		0.662842				OFF		Cellular Processes	Amino acid metabolism	Amino acid metabolism	280856	Unknown	CD0304	CD630_03040
CDIF630erm_00430	CD630_03050	Putative glutamate carboxypeptidase (EC 3.5.1.-)					ON		ON		Cellular process	Protein folding and degradation	Peptidases	Other	Cytoplasmic	CD0305	CD630_03050
CDIF630erm_00431	CD630_03060	Uncharacterized protein					ON		ON		Miscellaneous	Miscellaneous	Uncharacterized proteins	Other	CytoplasmicMembrane	CD0306	CD630_03060
CDIF630erm_00434	CD630_03090	Putative hydrolase, HAD superfamily, subfamily IB (EC 3.1.3.-)	0.057179		0.329612		0.264741		1.13949		Cellular Processes	Cofactors	Phosphate	Other	Cytoplasmic	CD0309	CD630_03090
CDIF630erm_00435	CD630_03100	Uncharacterized protein	OFF		-1.09885		2.56883	*	1.65209		Miscellaneous	Miscellaneous	Uncharacterized proteins	Other	Cytoplasmic	CD0310	CD630_03100
CDIF630erm_00436	CD630_03110	Putative spore coat assembly asparagine-rich protein			ON						Cellular Processes	Sporulation and germination	Sporulation and germination	Other	Unknown	CD0311	CD630_03110	SigH; Hfq; SigF; SigE; SpoA; SigB
CDIF630erm_00438	CD630_03130	cadmium, zinc and cobalt-transporting ATPase	-1.53076		-2.16753		1.59101		0.892505		Cellular Processes	Cofactors	Cation transporters	Other	CytoplasmicMembrane	CD0313	CD630_03130	ccpA
CDIF630erm_00447	CD630_03200	Two-component response regulator					ON		ON		Cellular Processes	Regulation and cell signaling	Uncharacterized two-component system	Other	Cytoplasmic	CD0320	CD630_03200
CDIF630erm_00449	CD630_03220	Putative ATPase	OFF		-1.00066		-0.187813		-0.0416415		Miscellaneous	Miscellaneous	Uncharacterized proteins	Other	Cytoplasmic	CD0322	CD630_03220
CDIF630erm_00452	cbiM	Cobalt transport protein CbiM (Energy-coupling factor transporter probable substrate-capture protein CbiM) (ECF transporter S component CbiM)	-0.846072		-3.35494	*	-0.388854		-1.55772	*	Cellular Processes	Cofactors	Cation transporters	CD0324	CytoplasmicMembrane	CD0324	CD630_03240	Hfq; CodY; SpoA; SigB
CDIF630erm_00454	cbiQ1	ABC-type transport system, cobalt-specific permease			OFF		ON		-1.21952		Cellular Processes	Cofactors	Cation transporters	CD0324	CytoplasmicMembrane	CD0326	CD630_03260	Hfq; SpoA; SigB
CDIF630erm_00455	cbiO	ABC transporter ATP-binding protein (EC 3.6.3.-)	-0.994738		-2.41789	*	0.560211		-0.686923		Cellular Processes	Cofactors	Cation transporters	CD0324	CytoplasmicMembrane	CD0327	CD630_03270	Hfq; SigB
CDIF630erm_00456	pcrA	DNA helicase (EC 3.6.4.12)	-2.28185		-2.55902	*	1.39122	*	2.08449	*	Cellular Processes	DNA and RNA metabolism	DNA repair	Other	Cytoplasmic	CD0328	CD630_03280	SigB
CDIF630erm_00457	apeB	aminipeptidase ApeB	-0.931693		-1.15863		-1.92393		-3.634		Cellular process	Protein folding and degradation	Protein folding and degradation	CD0328	Cytoplasmic	CD0329	CD630_03290	SigB
CDIF630erm_00458	CD630_03300	Phospholipase, patatin family	-0.796717		-1.98211		1.85882	*	1.09162	*	Cellular Processes	Fatty Acids	Degradation of fatty acids	Other	Unknown	CD0330	CD630_03300	ccpA
CDIF630erm_00459	ppiB	Peptidyl-prolyl cis-trans isomerase (PPIase) (EC 5.2.1.8)	-0.266111		0.502338		-1.6458	*	-2.10053	*	Cellular process	Protein folding and degradation	Protein folding and degradation	CD0328	Cytoplasmic	CD0331	CD630_03310	SigB
CDIF630erm_00460	bclA1	Putative exosporium glycoprotein			ON						Cellular Processes	Sporulation and germination	Sporulation and germination	Other	Unknown	CD0332	CD630_03320	Hfq; SigF; SigE; SigK; Fur
CDIF630erm_00461	ppaC	cobalt-dependent inorganic pyrophosphatase	-0.0615586		0.0110287		-0.903099		0.544772		Cellular Processes	DNA and RNA metabolism	Nucleosides and nucleotide metabolism	Other	Cytoplasmic	CD0333	CD630_03330
CDIF630erm_00464	CD630_03360	ABC-type transport system, ATP-binding protein (EC 3.6.3.-)			0.0614194	*	1.81769	*	1.82356		Cellular Processes	Stress Response and virulence	Resistance to antimicrobial peptides	Other	CytoplasmicMembrane	CD0336	CD630_03360
CDIF630erm_00467	CD630_03390	Two-component response regulator							ON		Cellular Processes	Regulation and cell signaling	Uncharacterized two-component system	Other	Cytoplasmic	CD0339	CD630_03390
CDIF630erm_00468	CD630_03400	Uncharacterized protein	-0.423136		-0.427889		-0.923438		-0.318821		Miscellaneous	Miscellaneous	Uncharacterized proteins	280867	CytoplasmicMembrane	CD0340	CD630_03400	SpoA
CDIF630erm_00469	CD630_03410	Uncharacterized protein	-0.550327		-0.662244		1.0391	*	0.177587		Miscellaneous	Miscellaneous	Uncharacterized proteins	280867	Cytoplasmic	CD0341	CD630_03410	ccpA; SpoA
CDIF630erm_00470	CD630_03420	Uncharacterized protein	ON				ON				Miscellaneous	Miscellaneous	Uncharacterized proteins	Other	Cytoplasmic	CD0342	CD630_03420
CDIF630erm_00472	CD630_03440	Putative beta-lactamase-like protein	-0.790862		0.104752		0.881634		2.0528	*	Miscellaneous	Miscellaneous	Uncharacterized proteins	CD0343	Cytoplasmic	CD0344	CD630_03440
CDIF630erm_00473	yjbM	GTP pyrophosphokinase YjbM	-0.700058		-1.52776		2.08795	*	1.56456	*	Miscellaneous	Miscellaneous	Uncharacterized proteins	CD0343	Cytoplasmic	CD0345	CD630_03450	SigB
CDIF630erm_00478	CD630_03500	Nucleotidase (EC 3.1.3.-)	3.49774		2.08146		6.04468	*	4.00843		Cellular Processes	DNA and RNA metabolism	Nucleosides and nucleotide metabolism	Other	Cytoplasmic	CD0350	CD630_03500	ccpA
CDIF630erm_00480	CD630_03520	Transcriptional regulator, RmlC-type	0.538669		-1.54584		1.85492		0.929659		Cellular Processes	Regulation and cell signaling	Transcriptional regulators	Other	Cytoplasmic	CD0352	CD630_03520
CDIF630erm_00481	CD630_03530	putative D-aminoacyl-tRNA deacylase									Cellular process	Protein synthesis	tRNA metabolism	Other	Cytoplasmic	CD0353	CD630_03530
CDIF630erm_00485	CD630_03580	Putative conjugative transposon protein Tn916-like, CTn1-Orf3					ON				Cellular Processes	Stress Response and virulence	Prophages	280870	Cytoplasmic	CD0358	CD630_03580
CDIF630erm_00486	CD630_03590	Putative RNA polymerase sigma factor Tn916-like,CTn1-Orf4	ON		ON		ON		ON		Cellular Processes	Stress Response and virulence	Prophages	280870	Cytoplasmic	CD0359	CD630_03590	Hfq
CDIF630erm_00495	CD630_03680	Two-component response regulator,Tn916-like,CTn1-Orf13	ON				ON				Cellular Processes	Regulation and cell signaling	Uncharacterized two-component system	Other	Cytoplasmic	CD0368	CD630_03680
CDIF630erm_00516	bglA	6-phospho-beta-glucosidase, bglA (EC 3.2.1.86)							ON		Cellular Processes	Energy metabolism	Glycolysis and gluconeogenesis	Other	Cytoplasmic	CD0389	CD630_03890	CodY
CDIF630erm_00520	CD630_03920	Putative radical SAM-family protein	-1.33593	*	-0.784521		-0.0542441		0.0274637		Cellular Processes	Central energy metabolism	Enzyme of central carbon metabolism	Other	Cytoplasmic	CD0392	CD630_03920	SigD
CDIF630erm_00522	ldhA	(R)-2-hydroxyisocaproate dehydrogenase	0.21851		0.530091		-0.350902		0.121082		Cellular Processes	Central energy metabolism	Fermentation	Other	Cytoplasmic	CD0394	CD630_03940	Hfq; SigB
CDIF630erm_00523	hadA	Isocaprenoyl-CoA:2-hydroxyisocaproate CoA-transferase (EC 2.8.3.-)	0.232837		0.365205		-0.222868		0.614482		Cellular Processes	Amino acid metabolism	Amino acid metabolism	280879	Cytoplasmic	CD0395	CD630_03950	Hfq; SpoA; ; RpoN (Target); SigB
CDIF630erm_00524	hadI	Activator of 2-hydroxyisocaproyl-CoA dehydratase	-0.0966955		-0.6441		1.33862	*	0.720162	*	Cellular Processes	Amino acid metabolism	Amino acid metabolism	280879	Cytoplasmic	CD0396	CD630_03960	Hfq; SpoA; ; RpoN (Target); SigB
CDIF630erm_00525	hadB	Subunit of oxygen-sensitive 2-hydroxyisocaproyl-CoA dehydratase B	-0.145919		0.353808		-0.559049		0.40141		Cellular Processes	Amino acid metabolism	Amino acid metabolism	CD0397	Cytoplasmic	CD0397	CD630_03970	Hfq; SpoA; ; RpoN (Target); SigB
CDIF630erm_00526	hadC	Subunit of oxygen-sensitive 2-hydroxyisocaproyl-CoA dehydratase C	0.121169		0.223854		-0.712802		-0.0318003		Cellular Processes	Amino acid metabolism	Amino acid metabolism	CD0397	Cytoplasmic	CD0398	CD630_03980	Hfq; SpoA; ; RpoN (Target); SigB
CDIF630erm_00527	acdB	isocaproyl-CoA dehydrogenase, catalytic subunit	0.360612		-0.225543		0.85104	*	0.431361		Cellular Processes	Amino acid metabolism	Amino acid metabolism	CD0397	Cytoplasmic	CD0399	CD630_03990	Hfq; SpoA; ; RpoN (Target); SigB
CDIF630erm_00528	etfB1	isocaproyl-CoA dehydrogenase, electron transfer flavoprotein beta subunit	-0.00461227		-0.122354		0.273856		0.334749		Cellular Processes	Amino acid metabolism	Amino acid metabolism	CD0397	Cytoplasmic	CD0400	CD630_04000	ccpA; Hfq; SpoA; RpoN (Target); SigB
CDIF630erm_00529	etfA1	isocaproyl-CoA dehydrogenase, electron transfer flavoprotein alpha subunit	0.0809486		-0.40239		0.782191		0.371883		Cellular Processes	Amino acid metabolism	Amino acid metabolism	CD0397	Cytoplasmic	CD0401	CD630_04010	Hfq; SpoA; ; RpoN (Target); SigB
CDIF630erm_00530	CD630_04020	Transcriptional regulator, sigma-54-dependent	-0.6268		-1.51851		1.5714	*	1.63177	*	Cellular Processes	Stress Response and virulence	RpoN dependent stress reponse	Other	Cytoplasmic	CD0402	CD630_04020	ccpA; RpoN (EBP)
CDIF630erm_00531	fba	Fructose-1,6-bisphosphate aldolase (EC 4.1.2.13)	0.688774		1.15458		-1.76563		-1.13269		Cellular Processes	Energy metabolism	Glycolysis and gluconeogenesis	Other	Cytoplasmic	CD0403	CD630_04030	SigB
CDIF630erm_00532	CD630_04040	Uncharacterized protein	0.0177011		OFF		3.09417		OFF		Miscellaneous	Miscellaneous	Uncharacterized proteins	CD0404	Cytoplasmic	CD0404	CD630_04040
CDIF630erm_00533	rluA	Pseudouridine synthase (EC 5.4.99.-)	OFF				1.93836		ON		Cellular process	Protein synthesis	Ribosome biogenesis	CD0404	Cytoplasmic	CD0405	CD630_04050
CDIF630erm_00534	CD630_04060	Putative tRNA (Uracil-5-)-methyltransferase (EC 2.1.1.35)	-0.49282		-0.69931		-2.07759				Cellular process	Protein synthesis	tRNA metabolism	CD0404	Cytoplasmic	CD0406	CD630_04060
CDIF630erm_00550	CD630_04220	Putative conjugative transposon protein Tn1549-like, CTn2-Orf17	0.0613214		0.412283		-3.13395	*	-1.30215		Miscellaneous	Miscellaneous	Uncharacterized proteins	CD0404	CytoplasmicMembrane	CD0422	CD630_04220
CDIF630erm_00556	CD630_04280	Transcriptional regulator, AraC family Tn1549-like, CTn2-Orf23	-0.333496		-0.121886		2.05243		1.4496		Cellular Processes	Regulation and cell signaling	Transcriptional regulators	AraC family transcriptional regulators	Cytoplasmic	CD0428	CD630_04280
CDIF630erm_00565	CD630_04360	Putative recombinase Tn1549-like, CTn2-Orf34	-0.0850991		-0.571517		0.133498		1.72213		Cellular Processes	Stress Response and virulence	Prophages	Other	Cytoplasmic	CD0436	CD630_04360	SigH
CDIF630erm_00566	CD630_04380	Uncharacterized protein					ON		ON		Miscellaneous	Miscellaneous	Uncharacterized proteins	Other	Unknown	CD0438	CD630_04380
CDIF630erm_00568	cwp27	Putative cell wall binding protein cwp27	-0.111563		2.03911		-2.08519		0.49491		Cell Envelope	Cell wall	SlpA and paralogues	Other	Cellwall	CD0440	CD630_04400	SigH; CodY; SpoA; SigB
CDIF630erm_00570	ord	2,4-diaminopentanoate dehydrogenase (EC 1.4.1.12)			ON						Cellular Processes	Amino acid metabolism	Amino acid metabolism	Other	Cytoplasmic	CD0442	CD630_04420	RpoN (Target)
CDIF630erm_00579	CD630_04510	Putative dioxygenase	1.26615		2.43786		1.69849		1.75269		Miscellaneous	Miscellaneous	Uncharacterized proteins	CD0451	Cytoplasmic	CD0451	CD630_04510
CDIF630erm_00580	CD630_04520	Putative hydrolase, NUDIX family	0.177626		0.982312		0.606178		1.65726		Miscellaneous	Miscellaneous	Uncharacterized proteins	CD0451	Cytoplasmic	CD0452	CD630_04520	ccpA
CDIF630erm_00587	CD630_04590	ABC-type transport system, ATP-binding protein (EC 3.6.3.-)			ON		ON				Cellular Processes	Stress Response and virulence	Resistance to antimicrobial peptides	Other	CytoplasmicMembrane	CD0459	CD630_04590
CDIF630erm_00593	CD630_04650	Transcriptional regulator, RpiR family					ON		ON		Cellular Processes	Regulation and cell signaling	Transcriptional regulators	CD0465	Cytoplasmic	CD0465	CD630_04650
CDIF630erm_00594	CD630_04660	Transcriptional regulator, RpiR family			OFF				OFF		Cellular Processes	Regulation and cell signaling	Transcriptional regulators	CD0465	Cytoplasmic	CD0466	CD630_04660
CDIF630erm_00599	blaI	penicillinase repressor	-0.37854		-1.12062	*	-1.21981		-0.958948		Cellular Processes	Stress Response and virulence	Antibiotic resistance	Other	Unknown	CD0471	CD630_04710	Hfq
CDIF630erm_00602	CD630_04740	Putative iron-sulfur protein					ON		ON		Cellular Processes	Central energy metabolism	Electron transport	Other	Unknown	CD0474	CD630_04740
CDIF630erm_00603	CD630_04750	uracil-DNA glycosylase-like protein	3.37151				2.77057		1.0057		Miscellaneous	Miscellaneous	Uncharacterized proteins	Other	Unknown	CD0475	CD630_04750
CDIF630erm_00609	spaR	Two-component response regulator					ON				Cellular Processes	Regulation and cell signaling	Uncharacterized two-component system	Other	Cytoplasmic	CD0481	CD630_04810
CDIF630erm_00615	CD630_04870	omega-amidase NIT2	-0.298038		0.535411		-0.986541		0.256826		Cellular Processes	Cofactors	Nitrogen and sulfur metabolism	Other	Cytoplasmic	CD0487	CD630_04870
CDIF630erm_00618	purC1	phosphoribosylaminoimidazole-succinocarboxamide synthetase	-0.432008		-0.212933		0.222272		0.592064		Cellular Processes	DNA and RNA metabolism	Nucleosides and nucleotide metabolism	Other	Cytoplasmic	CD0489	CD630_04890	SigH
CDIF630erm_00620	CD630_04910	PTS system, ribitol-specific IIA component					ON		ON		Cellular Processes	Carbohydrate metabolism	Ribitol	CD0490	Cytoplasmic	CD0491	CD630_04910	SigD; RpoN (Target)
CDIF630erm_00621	CD630_04920	PTS system, ribitol-specific IIB component	-1.80943		-0.803587		0.0688143		-0.0324057		Cellular Processes	Carbohydrate metabolism	Ribitol	CD0490	Cytoplasmic	CD0492	CD630_04920	SigD; RpoN (Target)
CDIF630erm_00626	cwpV	Putative hemagglutinin/adhesin cwpV	1.13627	*	1.45734		-0.931936		-2.85343		Cell Envelope	Cell wall	SlpA and paralogues	Other	Cellwall	CD0514	CD630_05140	SigH; Hfq; SigD
CDIF630erm_00627	dacF1	D-alanyl-D-alanine carboxypeptidase, S11 peptidase family (EC 3.4.16.4)	1.39404		0.229018		OFF		1.02935		Cell Envelope	Cell wall	Cell wall biosynthesis	Other	CytoplasmicMembrane	CD0515	CD630_05150
CDIF630erm_00628	CD630_05160	Transcription antiterminator					ON		2.58652		Cellular Processes	DNA and RNA metabolism	RNA Processing	Other	Cytoplasmic	CD0516	CD630_05160	RpoN (EBP)
CDIF630erm_00631	CD630_05190	Uncharacterized protein	-1.18025		-2.53208	*	0.136185		-1.14937	*	Miscellaneous	Miscellaneous	Uncharacterized proteins	Other	CytoplasmicMembrane	CD0519	CD630_05190
CDIF630erm_00632	CD630_05200	Two-component sensor histidine kinase			OFF		ON		1.43044		Cellular Processes	Regulation and cell signaling	Uncharacterized two-component system	280905	CytoplasmicMembrane	CD0520	CD630_05200
CDIF630erm_00633	CD630_05210	Two-component response regulator	-0.0414191		OFF		1.69625		1.37335		Cellular Processes	Regulation and cell signaling	Uncharacterized two-component system	280905	Cytoplasmic	CD0521	CD630_05210
CDIF630erm_00641	CD630_05280	putative amidohydrolase	-1.23619		-1.82488		-1.34253		-2.24307		Cellular process	Protein folding and degradation	Peptidases	Other	Cytoplasmic	CD0528	CD630_05280
CDIF630erm_00646	cheY	Chemotaxis protein CheY	0.145371		-1.83941		2.56065		1.59403		Cell Envelope	Adhesion and motility	Chemotaxis	CD0533	Cytoplasmic	CD0533	CD630_05330	SigD
CDIF630erm_00647	cheC	Chemotaxis protein CheY-P phosphatase CheC (EC 3.-.-.-)					1.56572		ON		Cell Envelope	Adhesion and motility	Chemotaxis	CD0533	Unknown	CD0534	CD630_05340	SigD
CDIF630erm_00648	cheD	Probable chemoreceptor glutamine deamidase CheD (EC 3.5.1.44)	-0.880436		-2.75789		3.24424	*	0.888498		Cell Envelope	Adhesion and motility	Chemotaxis	CD0533	Unknown	CD0535	CD630_05350	SigD
CDIF630erm_00649	cheW	Purine-binding chemotaxis protein CheW					ON				Cell Envelope	Adhesion and motility	Chemotaxis	CD0533	Cytoplasmic	CD0536	CD630_05360	SigD
CDIF630erm_00650	CD630_05370	Putative CheY-like chemosensory protein	-0.888337		-2.0312		2.75927		1.79204	*	Cell Envelope	Adhesion and motility	Chemotaxis	CD0533	Cytoplasmic	CD0537	CD630_05370	SigD
CDIF630erm_00651	CD630_05380	Putative methyl-accepting chemotaxis receptor,MCP family	-1.27353		-2.64852	*	2.03757	*	1.26525	*	Cell Envelope	Adhesion and motility	Chemotaxis	CD0533	CytoplasmicMembrane	CD0538	CD630_05380	SigD
CDIF630erm_00652	cheA	Chemotaxis protein CheA (EC 2.7.13.3)	-0.102094		-2.66587		0.355204		2.64483		Cell Envelope	Adhesion and motility	Chemotaxis	CD0533	Cytoplasmic	CD0539	CD630_05390	SigD
CDIF630erm_00654	cheR	Methyl-accepting chemotaxis proteins methyltransferase, MCP family (EC 2.1.1.80)			OFF				0.245598		Cell Envelope	Adhesion and motility	Chemotaxis	CD0533	Cytoplasmic	CD0541	CD630_05410	SigD
CDIF630erm_00657	arcB	Putative ornithine cyclodeaminase (EC 4.3.1.12)	-0.662639		0.0474409		-0.934004		0.197983		Cellular Processes	Amino acid metabolism	Amino acid metabolism	Other	Cytoplasmic	CD0544	CD630_05440
CDIF630erm_00658	CD630_05450	Putative lipoprotein	-0.477537		-0.794647		0.581608		-0.822506		Cell Envelope	Cell membrane	Lipoproteins	Lipoproteins	Unknown	CD0545	CD630_05450
CDIF630erm_00659	CD630_05460	Putative membrane protein, DUF975 family	-1.25562		-2.62145	*	0.598954		-0.881929		Cell Envelope	Cell membrane	Cell membrane	Other	CytoplasmicMembrane	CD0546	CD630_05460
CDIF630erm_00660	CD630_05470	Transcriptional regulator, beta-lactams repressor	1.01727		1.5233		0.469834		0.639144		Cellular Processes	Regulation and cell signaling	Transcriptional regulators	Other	Cytoplasmic	CD0547	CD630_05470
CDIF630erm_00662	CD630_05490	Uncharacterized protein			OFF				OFF		Miscellaneous	Miscellaneous	Uncharacterized proteins	Other	Unknown	CD0549	CD630_05490	SigH; ccpA; Hfq
CDIF630erm_00664	sleC	Spore cortex-lytic enzyme pre-pro-form	ON		4.67446				OFF		Cellular Processes	Sporulation and germination	Sporulation and germination	Other	Unknown	CD0551	CD630_05510	Hfq; SigF; SigE; SigKSigB
CDIF630erm_00666	CD630_05530	Putative RNA methyltransferase	-0.266342				1.01573		0.30401		Cellular process	Protein Metabolism	tRNA metabolism	Other	Cytoplasmic	CD0553	CD630_05530	SigH
CDIF630erm_00667	sip2	Signal peptidase I (EC 3.4.21.89)	-2.5525		-2.18522	*	-0.624925		-2.20366	*	Cellular process	Protein Metabolism	Sec secretion	Other	CytoplasmicMembrane	CD0554	CD630_05540	SigH
CDIF630erm_00670	udk	fusion protein threonine-tRNA ligase / uridine kinase	-0.521834		0.520749		-1.10243		0.929157		Cellular Processes	DNA and RNA metabolism	Transcription	CD0552	Cytoplasmic	CD0557	CD630_05570	SigH; SigE; SpoA; SigB
CDIF630erm_00671	glsA	Glutaminase (EC 3.5.1.2)	-2.22423		0.118614		0.164199		0.508023		Cellular Processes	Amino acid metabolism	Glutamine, glutamate, aspartate and asparagine metabolism	Glutamine, glutamate, aspartate and asparagine metabolism	Cytoplasmic	CD0558	CD630_05580	SigB
CDIF630erm_00672	CD630_05590	Transcriptional regulator, ArsR family	-0.615616		0.132239		-1.21932		0.327496		Cellular Processes	Regulation and cell signaling	Transcriptional regulators	ArsR family transcriptional regulators	Cytoplasmic	CD0559	CD630_05590
CDIF630erm_00673	nfo	Endonuclease 4 (EC 3.1.21.2) (Endodeoxyribonuclease IV) (Endonuclease IV)					ON		ON		Cellular Processes	DNA and RNA metabolism	DNA repair	Other	Cytoplasmic	CD0560	CD630_05600	c-di-GMP
CDIF630erm_00674	CD630_05610	Putative aldo/keto reductase putative ferredoxin (EC 1.1.1.274)	-0.709586		-1.51097		2.49895	*	1.19686		Cellular Processes	Central energy metabolism	Electron transport	Other	Cytoplasmic	CD0561	CD630_05610
CDIF630erm_00677	CD630_05640	Endopeptidase La (EC 3.4.21.53)	2.83657		3.31879	*	0.837703		1.16181		Cellular process	Protein folding and degradation	Peptidases	Other	Cytoplasmic	CD0564	CD630_05640	SigF; SigE;SigK; SigB
CDIF630erm_00679	trmL	Putative tRNA (cytidine(34)-2'-O)-methyltransferase (EC 2.1.1.207) (tRNA (cytidine/uridine-2'-O-)-methyltransferase)	ON								Cellular process	Protein synthesis	tRNA metabolism	Other	Cytoplasmic	CD0566	CD630_05660	SigH
CDIF630erm_00680	CD630_05670	Uncharacterized protein, DegV family	-0.878635		0.253854		-2.09961		OFF		Cellular Processes	DNA and RNA metabolism	DNA metabolism	Other	Cytoplasmic	CD0567	CD630_05670	SigH
CDIF630erm_00681	CD630_05690	Putative lipoprotein	-0.00568872		-2.05535		0.95198		-0.0493814		Cell Envelope	Cell membrane	Lipoproteins	Lipoproteins	Unknown	CD0569	CD630_05690
CDIF630erm_00685	CD630_05730	Putative membrane protein		*	OFF	*	1.61451		-0.887865		Cell Envelope	Cell membrane	Cell membrane	Other	Cytoplasmic	CD0573	CD630_05730	SigH; ccpA; SigB
CDIF630erm_00687	thrS	Threonine--tRNA ligase (EC 6.1.1.3) (Threonyl-tRNA synthetase) (ThrRS)	-0.965371		-0.660011		-0.984347		-0.0162151		Cellular process	Protein synthesis	tRNA metabolism	Other	Cytoplasmic	CD0574	CD630_05740
CDIF630erm_00690	CD630_05770	Uncharacterized protein	0.364648		0.709709		1.59294	*	0.634438		Miscellaneous	Miscellaneous	Uncharacterized proteins	Other	Cytoplasmic	CD0577	CD630_05770	CodY
CDIF630erm_00693	gapN	Glyceraldehyde-3-phosphate dehydrogenase (NADP(+)) (GADPH) (EC 1.2.1.9)	OFF		OFF	*	-1.21849		-1.42876		Cellular Processes	Energy metabolism	Glycolysis and gluconeogenesis	Other	Cytoplasmic	CD0580	CD630_05800	SigH; ccpA; c-di-GMP; SigB
CDIF630erm_00694	CD630_05810	Transcriptional regulator, TetR family			OFF		ON		1.6945		Cellular Processes	Regulation and cell signaling	Transcriptional regulators	TetR family	CytoplasmicMembrane	CD0581	CD630_05810	Fur
CDIF630erm_00700	CD630_05870	Uncharacterized protein	1.84165	*	3.07676	*	-0.722182		-1.1375		Miscellaneous	Miscellaneous	Uncharacterized proteins	317	Unknown	CD0587	CD630_05870	SigH; ccpA; CodY; Fur; SpoA; c-di-GMP
CDIF630erm_00701	CD630_05880	Uncharacterized protein	1.26468		2.36823		-1.42832		-2.10743		Miscellaneous	Miscellaneous	Uncharacterized proteins	317	CytoplasmicMembrane	CD0588	CD630_05880	c-di-GMP
CDIF630erm_00702	CD630_05890	Uncharacterized protein	1.86505	*	2.42549	*	-1.35073		1.91121	*	Miscellaneous	Miscellaneous	Uncharacterized proteins	318	Unknown	CD0589	CD630_05890
CDIF630erm_00703	CD630_05900	Uncharacterized protein	2.2507		ON		1.52247				Miscellaneous	Miscellaneous	Uncharacterized proteins	318	Cytoplasmic	CD0590	CD630_05900
CDIF630erm_00704	CD630_05910	Putative ATPase, P-type, heavy metal translocating	ON		2.9058		ON		1.75967		Cellular Processes	Cofactors	Cation transporters	319	CytoplasmicMembrane	CD0591	CD630_05910	Fur
CDIF630erm_00705	CD630_05920	Uncharacterized protein	3.11949	*	1.87		0.694415		0.106581		Cellular Processes	Cofactors	Cation transporters	319	Unknown	CD0592	CD630_05920	Fur
CDIF630erm_00708	CD630_05940	Uncharacterized protein		*	OFF		ON		0.857281		Miscellaneous	Miscellaneous	Uncharacterized proteins	280921	Unknown	CD0594	CD630_05940	Fur; SigB
CDIF630erm_00709	CD630_05950	Putative nuclease, ParB-like	OFF		OFF		2.51326		1.77722		Miscellaneous	Miscellaneous	Uncharacterized proteins	280921	Cytoplasmic	CD0595	CD630_05950	Fur; SigB
CDIF630erm_00710	CD630_05960	putative spore coat protein, CotJA-like			ON						Cellular Processes	Sporulation and germination	Sporulation and germination	CD0596	Unknown	CD0596	CD630_05960	Hfq; SigF; SigE; SigK; Fur
CDIF630erm_00712	cotCB	Spore-coat protein, manganese catalase	4.38813		6.6982		OFF		OFF		Cellular Processes	Sporulation and germination	Sporulation and germination	CD0596	Cytoplasmic	CD0598	CD630_05980	Hfq; SigE; SigK; Fur
CDIF630erm_00714	ogt1	Methylated-DNA--protein-cysteine methyltransferase (EC 2.1.1.63) (6-O-methylguanine-DNA methyltransferase) (MGMT) (O-6-methylguanine-DNA-alkyltransferase)			1.01049		ON		-0.00239636		Cellular Processes	DNA and RNA metabolism	DNA repair	Other	Unknown	CD0601	CD630_06010
CDIF630erm_00715	CD630_06020	Uncharacterized protein	-2.28432		OFF				OFF		Miscellaneous	Miscellaneous	Uncharacterized proteins	Other	Cytoplasmic	CD0602	CD630_06020
CDIF630erm_00721	CD630_06090	Uncharacterized protein			OFF		ON		1.23963		Miscellaneous	Miscellaneous	Uncharacterized proteins	Other	Cytoplasmic	CD0609	CD630_06090
CDIF630erm_00727	CD630_06150	Transcriptional regulator, TetR family					ON				Cellular Processes	Regulation and cell signaling	Transcriptional regulators	TetR family	Cytoplasmic	CD0615	CD630_06150	SigD
CDIF630erm_00730	CD630_06180	Transcriptional regulator, LytR family			OFF		ON		1.27446		Cellular Processes	Regulation and cell signaling	Transcriptional regulators	LytR family transcriptional regulators	Cytoplasmic	CD0618	CD630_06180	CodY; SigD; SpoA; c-di-GMP
CDIF630erm_00741	CD630_06290	Transcriptional regulator, Crp family	ON		2.35744		ON		2.95369		Cellular Processes	Regulation and cell signaling	Transcriptional regulators	Crp family transcriptional regulators transcriptional regulators	Cytoplasmic	CD0629	CD630_06290	SigH; SigF; SigE
CDIF630erm_00745	CD630_06330	Uncharacterized protein					ON		ON		Miscellaneous	Miscellaneous	Uncharacterized proteins	Other	Cytoplasmic	CD0633	CD630_06330
CDIF630erm_00749	CD630_06370	Putative acetyltransferase					ON				Miscellaneous	Miscellaneous	Uncharacterized proteins	Other	Unknown	CD0637	CD630_06370
CDIF630erm_00752	CD630_06400	Uncharacterized protein	0.95155		0.146111		2.34538	*	1.65637	*	Miscellaneous	Miscellaneous	Uncharacterized proteins	Other	Unknown	CD0640	CD630_06400	ccpA
CDIF630erm_00756	CD630_06430	Two-component response regulator			OFF		ON		1.26386		Cellular Processes	Stress Response and virulence	Multi-drug transport	CD0643	Cytoplasmic	CD0643	CD630_06430
CDIF630erm_00758	CD630_06450	ABC-type transport system,lantibiotic/multidrug-family ATP-binding protein	OFF		OFF		0.0647228		1.20436		Cellular Processes	Stress Response and virulence	Multi-drug transport	CD0643	CytoplasmicMembrane	CD0645	CD630_06450
CDIF630erm_00760	CD630_06480	Transcriptional regulator, GntR family	0.00776863		-0.419633		0.93479		0.788833		Cellular Processes	Regulation and cell signaling	Transcriptional regulators	GntR family transcriptional regulators	Cytoplasmic	CD0648	CD630_06480	ccpA
CDIF630erm_00764	CD630_06520	Transcriptional regulator, GntR family					ON		ON		Cellular Processes	Stress Response and virulence	Multi-drug transport	CD0652	Cytoplasmic	CD0652	CD630_06520
CDIF630erm_00765	CD630_06530	ABC-type transport system, multidrug-family ATP-binding protein (EC 3.6.3.-)	OFF		OFF		1.2511				Cellular Processes	Stress Response and virulence	Multi-drug transport	CD0652	CytoplasmicMembrane	CD0653	CD630_06530
CDIF630erm_00768	CD630_06550	Putative beta-lactamase-like protein							ON		Cellular Processes	Stress Response and virulence	Antibiotic resistance	Other	Cytoplasmic	CD0655	CD630_06550
CDIF630erm_00773	toxB	Toxin B (EC 2.4.1.-)	-1.22426		-0.682331		-3.67362	*	-2.81563	*	Cellular Processes	Stress Response and virulence	Virulence	Other	CytoplasmicMembrane	CD0660	CD630_06600	CodY
CDIF630erm_00776	toxA	Toxin A (EC 2.4.1.-)	-0.966666	*	-0.982125	*	-2.05353	*	-1.54589	*	Cellular Processes	Stress Response and virulence	Virulence	Other	Extracellular	CD0663	CD630_06630	SigH; CodY; SigD; SpoA
CDIF630erm_00783	CD630_06680	Two-component response regulator			ON		ON		ON		Cellular Processes	Regulation and cell signaling	Uncharacterized two-component system	Other	Cytoplasmic	CD0668	CD630_06680
CDIF630erm_00786	CD630_06710	Putative enzyme, glyoxalase family			-1.34902		ON		0.646164		Cellular Processes	Stress Response and virulence	Detoxification	Other	Cytoplasmic	CD0671	CD630_06710
CDIF630erm_00787	CD630_06720	Uncharacterized protein	-1.18774		-1.02539		0.763334		0.655168		Miscellaneous	Miscellaneous	Uncharacterized proteins	Other	Cytoplasmic	CD0672	CD630_06720	c-di-GMP
CDIF630erm_00788	CD630_06730	Putative methyltransferase	-0.605149		-2.59915		2.19862		0.752946		Cellular Processes	Fatty Acids	Fatty Acids	Other	Cytoplasmic	CD0673	CD630_06730	ccpA
CDIF630erm_00789	CD630_06750	GNAT family N-acetyltransferaseprotein			OFF		ON		OFF		Miscellaneous	Miscellaneous	Uncharacterized proteins	Other	Cytoplasmic	CD0675	CD630_06750
CDIF630erm_00798	infC	Translation initiation factor IF-3	-0.753888		0.168043		-2.17219		OFF		Cellular process	Protein synthesis	Translation	CD0685	Cytoplasmic	CD0685	CD630_06850	SigH; Hfq
CDIF630erm_00799	rpmI	50S ribosomal protein L35	-1.50699	*	-0.483581		-1.82944	*	OFF		Cellular process	Protein synthesis	Ribosome biogenesis	CD0685	Cytoplasmic	CD0686	CD630_06860	SigH
CDIF630erm_00800	rplT	50S ribosomal protein L20	-1.90026		-1.95533		-1.49597		-2.91723		Cellular process	Protein synthesis	Ribosome biogenesis	CD0685	Cytoplasmic	CD0687	CD630_06870	SigH; Hfq
CDIF630erm_00801	CD630_06880	DNA-binding protein	-0.0455446		1.39401		-0.282923		OFF		Miscellaneous	Miscellaneous	Uncharacterized proteins	Other	Cytoplasmic	CD0688	CD630_06880
CDIF630erm_00805	CD630_06920	Putative metallo-hydrolase/oxidoreductase	-0.538347		-0.875354		2.00949	*	1.51069	*	Miscellaneous	Miscellaneous	Uncharacterized proteins	Other	Cytoplasmic	CD0692	CD630_06920	SpoA
CDIF630erm_00806	CD630_06930	Transcriptional regulator, MerR family									Cellular Processes	Regulation and cell signaling	Transcriptional regulators	MerR family transcriptional regulators	Unknown	CD0693	CD630_06930
CDIF630erm_00811	ktrC	ktr system potassium uptake protein C	OFF		-0.479403		1.94126		-0.00525433		Cellular Processes	Cofactors	Cation transporters	Other	CytoplasmicMembrane	CD0697	CD630_06970
CDIF630erm_00812	CD630_06980	Putative tRNA/rRNA methyltransferase, SpoU	OFF		OFF		-1.38861		OFF		Cellular process	Protein synthesis	Ribosome biogenesis	Other	Unknown	CD0698	CD630_06980
CDIF630erm_00814	pheS	Phenylalanine--tRNA ligase alpha subunit (EC 6.1.1.20) (Phenylalanyl-tRNA synthetase alpha subunit) (PheRS)	-0.0468837		-0.0985361		-0.958762		-1.0231		Cellular process	Protein synthesis	tRNA metabolism	CD0699	Cytoplasmic	CD0699	CD630_06990
CDIF630erm_00815	pheT	Phenylalanine--tRNA ligase beta subunit (EC 6.1.1.20) (Phenylalanyl-tRNA synthetase beta subunit) (PheRS)	-0.135748		-0.324903		-1.58329		-1.08804		Cellular process	Protein synthesis	tRNA metabolism	CD0699	Cytoplasmic	CD0700	CD630_07000
CDIF630erm_00816	CD630_07010	Cell division protein ZapA	-0.984399		-0.162258		-0.503661		0.372415		Cellular Processes	Cell division and cell death	Cell divisome and elongasom	Other	Cytoplasmic	CD0701	CD630_07010
CDIF630erm_00818	CD630_07030	Putative peptidase, U32 family	0.729117		-0.339557		0.3366		1.6135		Cellular Processes	Amino acid metabolism	Amino acid metabolism	CD0703	Cytoplasmic	CD0703	CD630_07030
CDIF630erm_00819	CD630_07040	Putative metal-dependent phosphohydrolase	-0.791976		-1.22762		2.29968	*	0.687533		Cellular Processes	Amino acid metabolism	Amino acid metabolism	CD0703	Cytoplasmic	CD0704	CD630_07040
CDIF630erm_00821	CD630_07060	putative nitroreductase-like oxidoreductase	-1.0689	*	-1.98585	*	-3.30455	*	-0.890975		Cellular Processes	Central energy metabolism	Electron transport	Other	Cytoplasmic	CD0706	CD630_07060	ccpA
CDIF630erm_00822	CD630_07070	Diguanylate kinase	-0.214549		-0.613375		1.85263		0.977882		Cellular Processes	Regulation and cell signaling	C-di-GMP signaling	Other	CytoplasmicMembrane	CD0707	CD630_07070
CDIF630erm_00823	pepD	cytosol non-specific dipeptidase	0.253181		0.209007		-1.44385	*	-2.70557	*	Cellular process	Protein folding and degradation	Peptidases	Other	Cytoplasmic	CD0708	CD630_07080	SigH; Hfq; SigB
CDIF630erm_00824	mutS2	Endonuclease MutS2 (EC 3.1.-.-)	-0.839606		-0.859954		1.2665		1.90579	*	Cellular Processes	DNA and RNA metabolism	DNA repair	280943	Cytoplasmic	CD0709	CD630_07090
CDIF630erm_00825	ybbK	Uncharacterized protein					ON		ON		Cellular Processes	DNA and RNA metabolism	DNA repair	280943	Unknown	CD0710	CD630_07100
CDIF630erm_00826	argS	Arginine--tRNA ligase (EC 6.1.1.19) (Arginyl-tRNA synthetase) (ArgRS)	-1.12989		-0.464566		-2.98833	*	-2.84564		Cellular process	Protein synthesis	tRNA metabolism	Other	Cytoplasmic	CD0711	CD630_07110
CDIF630erm_00827	CD630_07120	Uncharacterized protein			OFF		ON		0.612363		Miscellaneous	Miscellaneous	Uncharacterized proteins	Other	Cytoplasmic	CD0712	CD630_07120	ccpA
CDIF630erm_00828	CD630_07121	Uncharacterized protein	-0.152207		-0.679699		2.85243	*	2.06767	*	Miscellaneous	Miscellaneous	Uncharacterized proteins	Other	Extracellular	CD0712.1	CD630_07121
CDIF630erm_00829	CD630_07130	Putative radical SAM domain-containing protein	OFF	*	OFF	*	3.13052		2.18288		Miscellaneous	Miscellaneous	Uncharacterized proteins	CD0713	Cytoplasmic	CD0713	CD630_07130
CDIF630erm_00830	CD630_07140	Tetratricopeptide repeat protein	-0.460051		-1.82794		2.35528	*	1.18378		Miscellaneous	Miscellaneous	Uncharacterized proteins	CD0713	Cytoplasmic	CD0714	CD630_07140	CodY
CDIF630erm_00831	ptb1	Phosphate butyryltransferase (Phosphotransbutyrylase) (EC 2.3.1.19)	0.838197		1.47768	*	-2.02446		-2.09093		Cellular Processes	Central energy metabolism	Fermentation	Other	Cytoplasmic	CD0715	CD630_07150	ccpA; SpoA
CDIF630erm_00832	acsA	Carbon monoxide dehydrogenase (EC 1.2.7.4)	0.077403		0.417658		0.830415		0.935023	*	Cellular Processes	CO2 fixation	Acetyl-CoA-Wood-Ljungdahl Pathway	Other	Cytoplasmic	CD0716	CD630_07160	SigH; ccpA
CDIF630erm_00833	cooC	arbon monoxide dehydrogenase, accessory protein	-0.386653		-0.811894		1.23973		1.05459	*	Cellular Processes	CO2 fixation	Acetyl-CoA-Wood-Ljungdahl Pathway	Other	Cytoplasmic	CD0717	CD630_07170	SigH
CDIF630erm_00834	fhs	Formate--tetrahydrofolate ligase (EC 6.3.4.3) (Formyltetrahydrofolate synthetase) (FHS) (FTHFS)	0.30323		0.54127		-2.03934	*	-2.00173		Cellular Processes	Energy metabolism	Acetyl-CoA-Wood-Ljungdahl Pathway	Other	Cytoplasmic	CD0718	CD630_07180	SigH; Hfq
CDIF630erm_00835	fchA	Methenyltetrahydrofolate cyclohydrolase (5,10-methenyltetrahydrofolate 5-hydrolase) (EC 3.5.4.9)	0.266095		1.43705	*	-2.11338	*	-2.84432		Cellular Processes	Energy metabolism	Acetyl-CoA-Wood-Ljungdahl Pathway	Other	Cytoplasmic	CD0719	CD630_07190	SigH
CDIF630erm_00836	folD	Bifunctional protein FolD [Includes: Methylenetetrahydrofolate dehydrogenase (EC 1.5.1.5); Methenyltetrahydrofolate cyclohydrolase (EC 3.5.4.9)]	0.210662		1.40167		-3.39233	*	-2.9096		Cellular Processes	Energy metabolism	Acetyl-CoA-Wood-Ljungdahl Pathway	Other	Cytoplasmic	CD0720	CD630_07200	SigH; ccpA; SigB
CDIF630erm_00837	metV	putative electron bifurcating methylenetetrahydrofolate reductase, small subunit	0.165721		1.08021		-1.03626		-1.30769		Cellular Processes	Energy metabolism	Acetyl-CoA-Wood-Ljungdahl Pathway	Other	Unknown	CD0721	CD630_07210	SigH; SpoA; SigB
CDIF630erm_00838	metF	putative electron bifurcating methylenetetrahydrofolate reductase, small subunit	0.402904		0.970913	*	-2.32975		-1.90072		Cellular Processes	Energy metabolism	Acetyl-CoA-Wood-Ljungdahl Pathway	Other	Cytoplasmic	CD0722	CD630_07220	SigH; SigB
CDIF630erm_00839	lpdA	glycine cleavage system, dihydrolipoyl dehydrogenase subunit	0.0102285		0.0921536		-1.49531		-2.02648	*	Cellular Processes	Energy metabolism	Acetyl-CoA-Wood-Ljungdahl Pathway	Other	Cytoplasmic	CD0723	CD630_07230	SigH; SigB
CDIF630erm_00840	CD630_07240	acetyl-CoA synthase, nickel-inserting subunit	-0.584169		-0.399576		1.42578	*	0.6016		Cellular Processes	Energy metabolism	Acetyl-CoA-Wood-Ljungdahl Pathway	AcsBCDE	Cytoplasmic	CD0724	CD630_07240	SigH; Hfq; SigB
CDIF630erm_00841	acsD	corrinoid / iron-sulfur protein, small subunit	0.140588		1.0436	*	-0.698014		-0.347075		Cellular Processes	Energy metabolism	Acetyl-CoA-Wood-Ljungdahl Pathway	AcsBCDE	Cytoplasmic	CD0725	CD630_07250	SigH; SigB
CDIF630erm_00842	acsC	corrinoid / iron-sulfur protein, large subunit	0.49948		0.544315		-0.0395561		-0.611021		Cellular Processes	Energy metabolism	Acetyl-CoA-Wood-Ljungdahl Pathway	AcsBCDE	Unknown	CD0726	CD630_07260	SigH; SigB
CDIF630erm_00843	acsE	5-methyltetrahydrofolate:corrinoid / iron-sulfur protein co-methyltransferase	0.390453		0.671528		0.854608		0.653648		Cellular Processes	Energy metabolism	Acetyl-CoA-Wood-Ljungdahl Pathway	AcsBCDE	Cytoplasmic	CD0727	CD630_07270	SigH; Hfq; SigB
CDIF630erm_00844	acsB	Acetyl-CoA synthase, subunit alpha/beta	-0.279026		0.369939		1.17024	*	1.07374	*	Cellular Processes	Energy metabolism	Acetyl-CoA-Wood-Ljungdahl Pathway	AcsBCDE	Cytoplasmic	CD0728	CD630_07280	SigH; Hfq; SigB
CDIF630erm_00845	gcvH	Glycine cleavage system H protein	-0.490964		0.1656		-1.83751		OFF		Cellular Processes	Energy metabolism	Acetyl-CoA-Wood-Ljungdahl Pathway	Other	Cytoplasmic	CD0729	CD630_07290	Hfq
CDIF630erm_00846	CD630_07300	ATP-dependent reductive activator of CoFeSP	-1.33923		0.579065		-1.5133		1.80139		Miscellaneous	Miscellaneous	Uncharacterized proteins	CD0730	Cytoplasmic	CD0730	CD630_07300
CDIF630erm_00848	CD630_07320	Putative radical SAM superfamily protein							ON		Miscellaneous	Miscellaneous	Uncharacterized proteins	CD0730	Cytoplasmic	CD0732	CD630_07320
CDIF630erm_00849	lipM	Octanoyltransferase LipM (EC 2.3.1.181) (Octanoyl-[acyl-carrier-protein]:[GcvH] N-octanoyltransferase)			-0.794061		1.79832	*	1.92896		Cellular process	Protein folding and degradation	Protein folding and degradation	Other	Cytoplasmic	CD0733	CD630_07330
CDIF630erm_00850	CD630_07340	putative RNA-binding protein					ON		ON		Miscellaneous	Miscellaneous	Uncharacterized proteins	CD0730	Cytoplasmic	CD0734	CD630_07340	Hfq
CDIF630erm_00851	CD630_07350	Uncharacterized protein	-0.260286		0.855316		-1.30306		OFF		Miscellaneous	Miscellaneous	Uncharacterized proteins	CD0730	Unknown	CD0735	CD630_07350
CDIF630erm_00852	CD630_07360	Uncharacterized protein	-0.566281		0.591897		-1.73729		OFF		Miscellaneous	Miscellaneous	Uncharacterized proteins	CD0730	Cytoplasmic	CD0736	CD630_07360	Hfq
CDIF630erm_00853	hisK	Histidinol-phosphatase (HolPase) (EC 3.1.3.15)	-0.450672		-1.72293		-0.0870826		0.802023		Cellular Processes	Amino acid metabolism	Histidine metabolism	Histidine metabolism	Cytoplasmic	CD0737	CD630_07370
CDIF630erm_00859	CD630_07430	Transcriptional regulator, DeoR family	-0.655231				-1.31344				Cellular Processes	Regulation and cell signaling	Transcriptional regulators	DeoR family transcriptional regulators	Unknown	CD0743	CD630_07430
CDIF630erm_00861	CD630_07440	Putative MotA/TolQ/ExbB proton channel	OFF	*	-2.47159		0.137247		-0.149518		Cell Envelope	Adhesion and motility	Flagellum	280949	CytoplasmicMembrane	CD0744	CD630_07440	SpoA
CDIF630erm_00862	CD630_07450	Putative OmpA/MotB proton channel			OFF				-1.80015		Cell Envelope	Adhesion and motility	Flagellum	280949	CytoplasmicMembrane	CD0745	CD630_07450	SpoA
CDIF630erm_00864	CD630_07470	Putative lipoprotein	-0.79		-2.65663	*	0.659447		-1.3217		Cell Envelope	Cell membrane	Cell membrane	Other	Unknown	CD0747	CD630_07470	ccpA
CDIF630erm_00865	CD630_07480	Phosphodiesterase			OFF	*	0.795125		2.25924		Cellular Processes	Regulation and cell signaling	C-di-GMP signaling	Other	CytoplasmicMembrane	CD0748	CD630_07480
CDIF630erm_00866	CD630_07490	DNA helicase (EC 3.6.4.12)		*	OFF		ON		2.92548		Cellular Processes	DNA and RNA metabolism	DNA metabolism	Other	Cytoplasmic	CD0749	CD630_07490	SigE; SigK; SigB
CDIF630erm_00868	CD630_07500	ABC-type transport system, aminoacid-family extracellular solute-binding protein	-0.684957		-1.2761	*	0.416968		-1.10379	*	Cellular Processes	Amino acid metabolism	Uptake of amino acids	CD0750	Unknown	CD0750	CD630_07500
CDIF630erm_00869	CD630_07510	ABC-type transport system, aminoacid-family permease	2.87212		-1.06561		-0.128504		-1.9889		Cellular Processes	Amino acid metabolism	Uptake of amino acids	CD0750	CytoplasmicMembrane	CD0751	CD630_07510
CDIF630erm_00870	CD630_07520	ABC-type transport system, aminoacid-family ATP-binding protein (EC 3.6.3.-)	2.35409		1.12175		4.25614	*	1.58196		Cellular Processes	Amino acid metabolism	Uptake of amino acids	CD0750	CytoplasmicMembrane	CD0752	CD630_07520	ccpA
CDIF630erm_00871	iscS1	Cysteine desulfurase (EC 2.8.1.7)	-0.818396		-1.49805		1.59253		1.65583	*	Cellular Processes	Cofactors	Iron-sulfur cluster	280952	Cytoplasmic	CD0753	CD630_07530
CDIF630erm_00872	thiI	sulfurtransferase ThiI	-0.937001		-0.8425		1.60178		2.17892	*	Cellular Processes	Cofactors	Iron-sulfur cluster	280952	Cytoplasmic	CD0754	CD630_07540
CDIF630erm_00873	CD630_07550	Major pilin			OFF				OFF		Cell Envelope	Adhesion and motility	Type IV pilus	Other	Unknown	CD0755	CD630_07550
CDIF630erm_00874	CD630_07560	Putative nitroreductase	-0.195893		1.26044		-2.32366	*	-0.193854		Cellular Processes	Cofactors	Nitrogen and sulfur metabolism	Other	Unknown	CD0756	CD630_07560
CDIF630erm_00875	CD630_07570	Phosphodiesterase					ON		ON		Cellular Processes	Regulation and cell signaling	C-di-GMP signaling	Other	CytoplasmicMembrane	CD0757	CD630_07570	CodY; c-di-GMP
CDIF630erm_00876	pflA	formate C-acetyltransferase activating enzyme	-0.15314		-0.630893		-3.25805		-0.0483364		Cellular Processes	Central energy metabolism	Conversion of pyruvate to acetyl-CoA	Other	Cytoplasmic	CD0758	CD630_07580	CodY; SpoA
CDIF630erm_00877	plfB	formate C-acetyltransferase	-0.151546		-1.11444		0.3594		0.921677	*	Cellular Processes	Central energy metabolism	Conversion of pyruvate to acetyl-CoA	Other	Cytoplasmic	CD0759	CD630_07590	ccpA; Hfq; CodY; SpoA; SigB
CDIF630erm_00879	cshA1	DEAD-box ATP-dependent RNA helicase CshA	0.388034		-2.7884		1.81199		1.49118	*	Cellular Processes	DNA and RNA metabolism	RNA Processing	Other	Cytoplasmic	CD0761	CD630_07610	SigF; SigE; SigB
CDIF630erm_00883	srlEa	PTS system, sorbitol-specific IIB N-terminal component	-1.0424		0.835409		-3.26609		OFF		Cellular Processes	DNA and RNA metabolism	DNA repair	Other	CytoplasmicMembrane	CD0765	CD630_07650
CDIF630erm_00886	srlD	Sorbitol 6-phosphate 2-dehydrogenase (Glucitol) (EC 1.1.1.140)	OFF				OFF				Cellular Processes	Carbohydrate metabolism	Sorbitol	Other	Cytoplasmic	CD0768	CD630_07680	ccpA; SigD; Fur
CDIF630erm_00887	CD630_07690	putative molybdopterin oxidoreductase	ON								Cellular Processes	Central energy metabolism	Electron transport	Other	Cytoplasmic	CD0769	CD630_07690
CDIF630erm_00888	spoIIAA	Anti-sigma F factor antagonist (Stage II sporulation protein)	0.248779		1.53711	*	0.041657		0.906299		Cellular Processes	Sporulation and germination	Sporulation and germination	CD0770	Unknown	CD0770	CD630_07700	SigH; SpoA; SigB
CDIF630erm_00889	spoIIAB	Anti-sigma F factor (EC 2.7.11.1) (Stage II sporulation protein AB)	0.407817		1.58367	*	-0.138268		0.542916		Cellular Processes	Sporulation and germination	Sporulation and germination	CD0770	Cytoplasmic	CD0771	CD630_07710	SigH; CodY; SpoA; SigB
CDIF630erm_00890	sigF	RNA polymerase sigma factor	OFF				OFF				Cellular Processes	Sporulation and germination	Sporulation and germination	CD0770	Cytoplasmic	CD0772	CD630_07720	SigH; CodY; SpoA; SigB
CDIF630erm_00894	CD630_07760	Transcriptional regulator, LacI family	0.227235		-1.00217		2.36496	*	0.750351		Cellular Processes	Regulation and cell signaling	Transcriptional regulators	LacI family transcriptional regulators	Cytoplasmic	CD0776	CD630_07760
CDIF630erm_00895	CD630_07770	Putative membrane protein			OFF				OFF		Miscellaneous	Miscellaneous	Uncharacterized proteins	CD0777	CytoplasmicMembrane	CD0777	CD630_07770	SigH; SigB
CDIF630erm_00897	CD630_07790	putative amidohydrolase, M20D peptidase family	0.867534		1.5153		-1.94731		-1.65723		Miscellaneous	Miscellaneous	Uncharacterized proteins	CD0777	Cytoplasmic	CD0779	CD630_07790	SigH; SigB
CDIF630erm_00898	CD630_07800	Uncharacterized protein	-1.05757		-0.876538		-2.10141		OFF		Miscellaneous	Miscellaneous	Uncharacterized proteins	CD0777	Cytoplasmic	CD0780	CD630_07800	SigH; ccpA; SigB
CDIF630erm_00899	CD630_07810	Putative penicillin-binding protein	-0.558669		-1.49574	*	-0.684275		-1.26411	*	Cell Envelope	Cell wall	Cell wall biosynthesis	Penicillin-binding proteins	CytoplasmicMembrane	CD0781	CD630_07810	SigB
CDIF630erm_00902	CD630_07840	Putative N-acetylmuramoyl-L-alanine amidase (EC 3.5.1.-)	-0.608031		OFF		-2.62333		OFF		Cell Envelope	Cell wall	Peptidoglycan turnover	Other	Unknown	CD0784	CD630_07840	ccpA; SigB
CDIF630erm_00904	CD630_07850	ABC-type transport system, ATP-binding protein (EC 3.6.3.-)	-0.719259		-0.387042		0.931574		1.54322		Miscellaneous	Miscellaneous	Uncharacterized proteins	Other	Cytoplasmic	CD0785	CD630_07850
CDIF630erm_00907	hflX	GTPase HflX (GTP-binding protein HflX)	-0.905787		-1.87244		2.28426		0.563648		Cellular process	Protein synthesis	Ribosome rescue	Other	Cytoplasmic	CD0788	CD630_07880	SigH; SpoA
CDIF630erm_00908	CD630_07890	armadillo-type fold protein							ON		Miscellaneous	Miscellaneous	Uncharacterized proteins	CD0788	Cytoplasmic	CD0789	CD630_07890	SigH
CDIF630erm_00909	CD630_07900	Putative hydrolase, NUDIX family	-0.526825		0.292306		-1.40008	*	-1.74473		Miscellaneous	Miscellaneous	Uncharacterized proteins	CD0788	Unknown	CD0790	CD630_07900
CDIF630erm_00910	CD630_07910	IMPACT family member protein	-0.0405115		-0.661481		1.38231		0.937023		Miscellaneous	Miscellaneous	Uncharacterized proteins	Other	Cytoplasmic	CD0791	CD630_07910
CDIF630erm_00913	nadE	NH(3)-dependent NAD(+) synthetase (EC 6.3.1.5)	-0.448962		-0.62756		0.152234		1.10054	*	Cellular Processes	Cofactors	NAD and NADP	Other	Cytoplasmic	CD0794	CD630_07940
CDIF630erm_00914	CD630_07950	Probable transcriptional regulatory protein CD630_07950	-0.149666		-0.810002		-1.10491		-0.430798		Cellular Processes	DNA and RNA metabolism	DNA metabolism	Other	Cytoplasmic	CD0795	CD630_07950
CDIF630erm_00915	CD630_07960	Transcriptional regulator, LacI family	-0.523908		-1.10609		1.77036		1.25406		Cellular Processes	Regulation and cell signaling	Transcriptional regulators	Other	Cytoplasmic	CD0796	CD630_07960
CDIF630erm_00925	CD630_08060	Transcriptional regulator, sigma-54-dependent					ON		ON		Cellular Processes	Stress Response and virulence	RpoN dependent stress reponse	Other	Cytoplasmic	CD0806	CD630_08060	RpoN (EBP)
CDIF630erm_00926	CD630_08070	Uncharacterized protein	-0.484586		0.220238		-0.577034		-1.42833		Miscellaneous	Miscellaneous	Uncharacterized proteins	Other	Cytoplasmic	CD0807	CD630_08070	ccpA; Hfq
CDIF630erm_00927	CD630_08090	Uncharacterized protein							ON		Miscellaneous	Miscellaneous	Uncharacterized proteins	Other	Cytoplasmic	CD0809	CD630_08090
CDIF630erm_00928	floX	putative flavodoxin	-1.35302	*	0.0608556		-2.19961	*	-4.07035	*	Cellular Processes	Central energy metabolism	Electron transport	Other	Cytoplasmic	CD0810	CD630_08100
CDIF630erm_00930	CD630_08120	Putative universal stress protein A (UspA)	-0.244943		-0.204896		0.261252		-0.234784		Cellular Processes	Stress Response and virulence	Universal stress response	Other	Cytoplasmic	CD0812	CD630_08120	ccpA
CDIF630erm_00931	CD630_08130	Putative PTS system, IIB component	OFF		0.257478		1.5762		1.09643		Cellular Processes	Carbohydrate metabolism	PTS systems	Other	Cytoplasmic	CD0813	CD630_08130	ccpA
CDIF630erm_00932	CD630_08140	Transcriptional regulator, GntR family					ON		ON		Cellular Processes	Regulation and cell signaling	Transcriptional regulators	Other	Cytoplasmic	CD0814	CD630_08140
CDIF630erm_00936	bglC	6-phospho-beta-glucosidase (EC 3.2.1.86)	-0.201752		-0.61252		-2.0139		-1.38229		Cellular Processes	Central energy metabolism	Glycolysis and Gluconeogenesis	Other	Cytoplasmic	CD0818	CD630_08180	SpoA
CDIF630erm_00938	CD630_08200	Two-component response regulator			-2.8388		2.10995	*	2.36918		Cellular Processes	Regulation and cell signaling	Uncharacterized two-component system	280967	Cytoplasmic	CD0820	CD630_08200	SpoA
CDIF630erm_00939	CD630_08210	Two-component sensor histidine kinase (EC 2.7.13.3)			OFF		ON		1.86368		Cellular Processes	Regulation and cell signaling	Uncharacterized two-component system	280967	Cytoplasmic	CD0821	CD630_08210
CDIF630erm_00940	CD630_08220	ABC-type transport system, multidrug-family ATP-binding protein (EC 3.6.3.-)					ON		ON		Cellular Processes	Stress Response and virulence	Multi-drug transport	Other	CytoplasmicMembrane	CD0822	CD630_08220
CDIF630erm_00944	rbr	Rubrerythrin	0.0779776		0.644445		-1.69589	*	-3.86183	*	Cellular Processes	Stress Response and virulence	Oxidative stress	CD0825	Cytoplasmic	CD0825	CD630_08250
CDIF630erm_00945	perR	peroxide-responsive repressor	0.509496		0.436487		1.64994	*	1.23872	*	Cellular Processes	Stress Response and virulence	Oxidative stress	CD0825	Cytoplasmic	CD0826	CD630_08260
CDIF630erm_00946	rbo	desulfoferrodoxin	0.776902		0.810791		-1.4281		-3.02875		Cellular Processes	Stress Response and virulence	Oxidative stress	CD0825	Unknown	CD0827	CD630_08270
CDIF630erm_00947	CD630_08280	oxidative stress glutamate dehydrogenase (glutamate synthase-like) (rubredoxin)	-0.155625		-0.67046		-1.19778	*	-2.31558	*	Cellular Processes	Stress Response and virulence	Oxidative stress	CD0825	Cytoplasmic	CD0828	CD630_08280	ccpA
CDIF630erm_00948	CD630_08290	Putative metallo-beta-lactamase superfamily protein	-0.487269		-0.0835025		-0.917458		OFF		Cell Envelope	Cell wall	Peptidoglycan turnover	Other	Cytoplasmic	CD0829	CD630_08290	SigB
CDIF630erm_00949	CD630_08300	na / leu symporter	-1.03059		-2.78803	*	0.677818		-1.13128	*	Cellular Processes	Amino acid metabolism	Uptake of amino acids	Other	CytoplasmicMembrane	CD0830	CD630_08300	ccpA
CDIF630erm_00951	aksA	citrate (Re)-synthase	0.137161		-0.651214		2.02968	*	1.44126	*	Cellular Processes	Energy metabolism	TCA cycle	CD0832	Cytoplasmic	CD0832	CD630_08320
CDIF630erm_00952	acnB	Aconitate hydratase (Citrate hydro-lyase) (EC 4.2.1.3)	0.138824		0.267368		-1.65175		-0.60642		Cellular Processes	Energy metabolism	TCA cycle	CD0832	Cytoplasmic	CD0833	CD630_08330
CDIF630erm_00953	icd	Isocitrate dehydrogenase NAD-dependent (EC 1.1.1.41)	-0.728898		-0.886892		0.720456		0.873328		Cellular Processes	Energy metabolism	TCA cycle	CD0832	Cytoplasmic	CD0834	CD630_08340	ccpA
CDIF630erm_00954	CD630_08350	Transcriptional regulator, MarR family	-1.81884	*	-1.50254		0.248529		-0.122456		Miscellaneous	Miscellaneous	Uncharacterized proteins	CD0835	Cytoplasmic	CD0835	CD630_08350
CDIF630erm_00955	CD630_08360	Putative acetyltransferase	-1.31185		-1.52309		0.00468239		-0.378601		Miscellaneous	Miscellaneous	Uncharacterized proteins	CD0835	Cytoplasmic	CD0836	CD630_08360
CDIF630erm_00956	CD630_08370	Putative nitroreductase	-1.1134	*	-0.479485		-2.66596	*	-3.32508		Miscellaneous	Miscellaneous	Uncharacterized proteins	CD0835	Cytoplasmic	CD0837	CD630_08370	SigB
CDIF630erm_00957	CD630_08380	Putative DNA-binding protein	OFF				OFF				Cellular Processes	DNA and RNA metabolism	DNA metabolism	Other	Unknown	CD0838	CD630_08380	SigH
CDIF630erm_00959	CD630_08400	Putative isomerase/hydrolase	0.639104		1.9304	*	-2.29038	*	-0.975117		Miscellaneous	Miscellaneous	Uncharacterized proteins	Other	Cytoplasmic	CD0840	CD630_08400	SigH; ccpA
CDIF630erm_00960	purH*	phosphoribosylaminoimidazolecarboxamide formyltransferase	0.301187		-0.343987		0.317134		0.964001		Cellular Processes	DNA and RNA metabolism	Nucleosides and nucleotide metabolism	Other	Unknown	CD0841	CD630_08410	SigH; ccpA; SigB
CDIF630erm_00962	CD630_08430	Putative glycosyl transferase, group 1			1.86406		ON		2.85889		Cell Envelope	Cell wall	Cell surface polysaccharides and lipopolysaccharides	Other	Cytoplasmic	CD0843	CD630_08430
CDIF630erm_00963	cwp25	Putative cell wall-binding protein cwp25	0.0485385		0.578647		-5.05343		OFF		Cell Envelope	Cell wall	SlpA and paralogues	Other	Cellwall	CD0844	CD630_08440	SigH; ccpA
CDIF630erm_00965	CD630_08460	Uncharacterized protein							ON		Miscellaneous	Miscellaneous	Uncharacterized proteins	Other	Unknown	CD0846	CD630_08460
CDIF630erm_00967	CD630_08480	Uncharacterized protein	0.81888		OFF		-0.794074		0.850077		Miscellaneous	Miscellaneous	Uncharacterized proteins	CD0847	CytoplasmicMembrane	CD0848	CD630_08480
CDIF630erm_00968	CD630_08490	putative AbgB-like amidohydrolase	0.712485		0.886869		-0.0487791		-0.864166		Miscellaneous	Miscellaneous	Uncharacterized proteins	CD0847	Cytoplasmic	CD0849	CD630_08490	CodY
CDIF630erm_00969	CD630_08500	Putative NifU-like protein	OFF				-0.327532				Miscellaneous	Miscellaneous	Uncharacterized proteins	CD0847	Cytoplasmic	CD0850	CD630_08500	ccpA
CDIF630erm_00971	CD630_08520	Transcriptional regulator, MarR family			OFF		ON		0.47998		Cellular Processes	Regulation and cell signaling	Transcriptional regulators	Other	Cytoplasmic	CD0852	CD630_08520
CDIF630erm_00972	oppB	ABC-type transport system, oligopeptide-family permease		*	OFF		ON		-1.76068		Cellular Processes	Amino acid metabolism	Uptake of amino acids	CD0853	CytoplasmicMembrane	CD0853	CD630_08530	Hfq; CodY
CDIF630erm_00973	oppC	ABC-type transport system, oligopeptide-family permease	OFF		OFF		0.77214		OFF		Cellular Processes	Amino acid metabolism	Uptake of amino acids	CD0853	CytoplasmicMembrane	CD0854	CD630_08540	CodY
CDIF630erm_00974	oppA	ABC-type transport system, oligopeptide-family extracellular solute-binding protein	0.462607		-0.515692		0.153827		-0.87895	*	Cellular Processes	Amino acid metabolism	Uptake of amino acids	CD0853	Cellwall	CD0855	CD630_08550	Hfq; CodY
CDIF630erm_00975	oppD	ABC-type transport system, ATP-binding component	OFF	*	OFF	*	2.15794		2.06485		Cellular Processes	Amino acid metabolism	Uptake of amino acids	CD0853	CytoplasmicMembrane	CD0856	CD630_08560	CodY
CDIF630erm_00985	CD630_08650	Putative ADP-ribose binding protein	-0.80922		-0.391821		-0.327709		0.366602		Cellular Processes	Cofactors	Phosphate	Other	Cytoplasmic	CD0865	CD630_08650	SigH; ccpA; SpoA; SigB
CDIF630erm_00988	CD630_08680	Dna binding domain, excisionase family	-1.2501		-1.02081		2.17137		1.42446		Cellular Processes	Stress Response and virulence	Prophages	Other	Cytoplasmic	CD0868	CD630_08680
CDIF630erm_00989	modA	ABC-type transport system, molybdenum-specific extracellular solute-binding protein	-2.48674		-2.75851	*	0.202185		-1.05123	*	Cellular Processes	Cofactors	Molybdem	CD0869	Unknown	CD0869	CD630_08690
CDIF630erm_00991	modC	ABC-type transport system, molybdenum-specific ATP-binding protein (EC 3.6.3.-)			OFF				1.10024		Cellular Processes	Cofactors	Molybdem	CD0869	CytoplasmicMembrane	CD0871	CD630_08710
CDIF630erm_00992	maa	Maltose O-acetyltransferase (EC 2.3.1.79)									Cellular Processes	Carbohydrate metabolism	Maltose	Other	Cytoplasmic	CD0872	CD630_08720
CDIF630erm_00993	CD630_08730	ABC-type transport system, sugar-family extracellular solute-binding protein	0.101022		-0.953464		0.750702		-0.801956		Cellular Processes	Carbohydrate metabolism	Carbohydrate uptake	CD0873	Unknown	CD0873	CD630_08730	CodY; SigB
CDIF630erm_00994	CD630_08740	ABC-type transport system, sugar-family ATP-binding protein (EC 3.6.3.-)	OFF	*	OFF	*	1.68489		0.530304		Cellular Processes	Carbohydrate metabolism	Carbohydrate uptake	CD0873	CytoplasmicMembrane	CD0874	CD630_08740	ccpA; CodY; SpoA; SigB
CDIF630erm_00996	CD630_08760	ABC-type transport system, sugar-family extracellular solute-binding protein	OFF		OFF	*	-1.27377		-2.46544		Cellular Processes	Carbohydrate metabolism	Carbohydrate uptake	Other	Unknown	CD0876	CD630_08760	CodY
CDIF630erm_00998	CDIF630erm_00998	ABC-type transport system, sugar-specific permease	OFF		OFF		0.415203		-1.36853		Cellular Processes	Carbohydrate metabolism	Carbohydrate uptake	Other	CytoplasmicMembrane	CD0878	CD630_08780
CDIF630erm_00999	nnrD	bifunctional NAD(P)H-hydrate repair enzyme Nnr	-1.15166		-0.46955		-4.22627		OFF		Cellular Processes	Cofactors	NAD and NADP	Other	Unknown	CD0879	CD630_08790	CodY; SigB
CDIF630erm_01000	CD630_08800	Putative protease	-0.209554		-0.881276		-0.391095		-1.68496	*	Miscellaneous	Miscellaneous	Uncharacterized proteins	280982	CytoplasmicMembrane	CD0880	CD630_08800	ccpA; SigB
CDIF630erm_01001	CD630_08810	putative protein modulating protease activity	-0.771279		-1.68538	*	0.175196		-1.35825	*	Miscellaneous	Miscellaneous	Uncharacterized proteins	280982	Cytoplasmic	CD0881	CD630_08810	ccpA; SigB
CDIF630erm_01002	glgC	Glucose-1-phosphate adenylyltransferase (EC 2.7.7.27) (ADP-glucose pyrophosphorylase) (ADPGlc PPase) (ADP-glucose synthase)	0.630127		0.889952		-1.1484		-0.300563		Cellular Processes	Carbohydrate metabolism	Biosynthesis and degradation of polysaccharides	CD0882	Cytoplasmic	CD0882	CD630_08820	SigH; CodY; SigB
CDIF630erm_01003	glgD	Glycogen biosynthesis protein	0.149727		0.749844		-1.34621		0.848716		Cellular Processes	Carbohydrate metabolism	Biosynthesis and degradation of polysaccharides	CD0882	Cytoplasmic	CD0883	CD630_08830	SigH; CodY; SpoA; SigB
CDIF630erm_01004	glgA	Glycogen synthase (EC 2.4.1.21) (Starch [bacterial glycogen] synthase)	0.243071		-0.154581		-0.192179		0.212564		Cellular Processes	Carbohydrate metabolism	Biosynthesis and degradation of polysaccharides	CD0882	Cytoplasmic	CD0884	CD630_08840	SigH; CodY; SigB
CDIF630erm_01005	glgP	Alpha-1,4 glucan phosphorylase (EC 2.4.1.1)	-1.18369		-0.942136		-0.742013		1.90511	*	Cellular Processes	Carbohydrate metabolism	Biosynthesis and degradation of polysaccharides	CD0882	Cytoplasmic	CD0885	CD630_08850	SigH; CodY; SpoA; SigB
CDIF630erm_01006	amyB	amylopullulanase	-1.46486		0.904674		-0.583995		1.08217		Cellular Processes	Carbohydrate metabolism	Carbohydrate utilization	CD0882	Cellwall	CD0886	CD630_08860	SigH; CodY; SigB
CDIF630erm_01007	CD630_08870	Transcriptional regulator, GntR family	0.0985009		-0.330566		0.971734		0.501434		Cellular Processes	Regulation and cell signaling	Transcriptional regulators	GntR family transcriptional regulators	Unknown	CD0887	CD630_08870	Hfq
CDIF630erm_01010	speE	Polyamine aminopropyltransferase (Putrescine aminopropyltransferase) (PAPT) (Spermidine synthase) (SPDS) (SPDSY) (EC 2.5.1.16)	-0.625375	*	0.445524		-2.04728	*	0.276052		Cellular Processes	Stress Response and virulence	Resistance to Other stresses than antibiotics	CD0888	Cytoplasmic	CD0890	CD630_08900	CodY
CDIF630erm_01013	hyd	ferredoxin hydrogenase	-0.342427		-1.14523		-1.23824		-0.700898		Cellular Processes	CO2 fixation	Acetyl-CoA-Wood-Ljungdahl Pathway	Other	Cytoplasmic	CD0893	CD630_08930	ccpA; CodY; SpoA; SigB
CDIF630erm_01014	hyd1	ferredoxin hydrogenase	1.38025		-0.823394		0.434203		0.718685		Cellular Processes	CO2 fixation	Acetyl-CoA-Wood-Ljungdahl Pathway	Other	Cytoplasmic	CD0894	CD630_08940
CDIF630erm_01017	CD630_08970	Uncharacterized protein	0.120748				0.96717		1.22367		Miscellaneous	Miscellaneous	Uncharacterized proteins	Other	CytoplasmicMembrane	CD0897	CD630_08970
CDIF630erm_01018	CD630_08980	UPF0371 protein CD630_08980	0.43075		-0.77037		0.170835		1.18006		Miscellaneous	Miscellaneous	Uncharacterized proteins	Other	Cytoplasmic	CD0898	CD630_08980	ccpA
CDIF630erm_01020	opuCA	ABC-type transport system, glycine betaine/carnitine/choline ATP-binding protein (EC 3.6.3.-)	1.02552		0.152766		1.76488	*	0.844433		Cellular Processes	Stress Response and virulence	Osmoprotection	280985	CytoplasmicMembrane	CD0900	CD630_09000
CDIF630erm_01021	opuCC	ABC-type transport system, glycine betaine/carnitine/choline permease	-0.280809		-1.85625	*	1.01125		-0.794562	*	Cellular Processes	Stress Response and virulence	Osmoprotection	280985	CytoplasmicMembrane	CD0901	CD630_09010
CDIF630erm_01026	CD630_09050	Putative phage protein	OFF		OFF		-0.369316		0.0522667		Cellular Processes	Stress Response and virulence	Prophages	Other	Unknown	CD0905	CD630_09050
CDIF630erm_01027	CD630_09060	Putative phage DNA-binding protein			OFF		1.19185		3.41432		Cellular Processes	Stress Response and virulence	Prophages	Other	Cytoplasmic	CD0906	CD630_09060	SigF
CDIF630erm_01029	CD630_09070	Transcriptional regulator, Phage-type	-0.497048		1.43701		-0.959164		0.372917		Cellular Processes	Stress Response and virulence	Prophages	Other	Cytoplasmic	CD0907	CD630_09070
CDIF630erm_01033	CD630_09100	Putative phage protein	-2.17928	*	-0.62992		-1.61106	*	-1.5029		Cellular Processes	Stress Response and virulence	Prophages	Other	Unknown	CD0910	CD630_09100
CDIF630erm_01121	rpsA	30S ribosomal protein S1	-0.958574		-2.22626	*	1.26482	*	0.91053	*	Cellular process	Protein synthesis	Ribosome biogenesis	Other	Cytoplasmic	CD0986	CD630_09860
CDIF630erm_01123	CD630_09880	Uncharacterized protein	OFF		OFF	*	0.602789		-1.54672		Miscellaneous	Miscellaneous	Uncharacterized proteins	Other	Unknown	CD0988	CD630_09880
CDIF630erm_01125	leuA	2-isopropylmalate synthase (EC 2.3.3.13) (Alpha-IPM synthase) (Alpha-isopropylmalate synthase)							ON		Cellular Processes	Amino acid metabolism	Amino acid metabolism	CD0989	Cytoplasmic	CD0989	CD630_09890	CodY
CDIF630erm_01126	leuC	3-isopropylmalate dehydratase large subunit (EC 4.2.1.33) (Alpha-IPM isomerase) (IPMI) (Isopropylmalate isomerase)					ON				Cellular Processes	Amino acid metabolism	Amino acid metabolism	CD0989	Cytoplasmic	CD0990	CD630_09900	CodY
CDIF630erm_01129	CD630_09930	Putative thioesterase	-0.530967		0.0187953		-1.39466		-1.10747		Cellular Processes	Cofactors	Sulfur Metabolism	Other	Cytoplasmic	CD0993	CD630_09930
CDIF630erm_01130	CD630_09940	Putative serine-pyruvate aminotransferase (EC 2.6.1.-)	-0.442693		0.160058		0.571188		0.945227		Cellular Processes	Amino acid metabolism	Amino acid metabolism	CD0994	Cytoplasmic	CD0994	CD630_09940	Hfq; SigB
CDIF630erm_01131	serA	hydroxypyruvate reductase			OFF		ON		1.17625		Cellular Processes	Amino acid metabolism	Amino acid metabolism	CD0994	Cytoplasmic	CD0995	CD630_09950	Hfq; SigD; Fur
CDIF630erm_01132	CD630_09960	Uncharacterized protein					ON		ON		Cellular Processes	Amino acid metabolism	Amino acid metabolism	CD0994	Cytoplasmic	CD0996	CD630_09960	Hfq; SigD; Fur
CDIF630erm_01134	CD630_09980	putative radical SAM protein	0.276524		-1.67748		1.14726		1.7042	*	Miscellaneous	Miscellaneous	Uncharacterized proteins	Other	Cytoplasmic	CD0998	CD630_09980
CDIF630erm_01135	CD630_09990	ABC-type transport system,nitrate/sulfonate/taurine extracellular solute-binding protein	-1.89128		-1.57384		-0.122059		-1.10165		Cellular Processes	Cofactors	Nitrogen and sulfur metabolism	Other	Unknown	CD0999	CD630_09990	SigB
CDIF630erm_01138	CD630_10020	Cys-tRNA(Pro)/Cys-tRNA(Cys) deacylase (EC 4.2.-.-)	-0.475742		0.447326		-1.67454		0.214284		Cellular process	Protein synthesis	tRNA metabolism	Other	Cytoplasmic	CD1002	CD630_10020
CDIF630erm_01139	fumA	Fumarate hydratase class I, subunit A (EC 4.2.1.2)	0.540691		-0.0985036		1.8163		2.31256		Cellular Processes	Energy metabolism	TCA cycle	CD1003	Cytoplasmic	CD1003	CD630_10030
CDIF630erm_01140	fumB	Fumarate hydratase class I, subunit B (EC 4.2.1.2)	0.224809		-0.209649		1.88384	*	1.07873		Cellular Processes	Energy metabolism	TCA cycle	CD1003	Cytoplasmic	CD1004	CD630_10040
CDIF630erm_01141	ytsJ	malate dehydrogenase (oxaloacetate-decarboxylating)	-0.869297		-0.908859		-3.52291		OFF		Cellular Processes	Energy metabolism	TCA cycle	CD1003	Cytoplasmic	CD1005	CD630_10050	ccpA
CDIF630erm_01142	CD630_10060	Putative acyl-CoA N-acyltransferase	-0.622006		0.993364		-0.256149				Miscellaneous	Miscellaneous	Uncharacterized proteins	Other	Cytoplasmic	CD1006	CD630_10060
CDIF630erm_01144	CD630_10080	S1 rna binding domain protein	-0.785308		-0.619015		-1.90052		0.0617202		Cellular process	Protein synthesis	Ribosome biogenesis	Other	Unknown	CD1008	CD630_10080
CDIF630erm_01145	CD630_10090	Transcriptional regulator, GntR family			OFF				OFF		Cellular Processes	Energy metabolism	N-acetylneuraminate utilization	CD1009	Cytoplasmic	CD1009	CD630_10090
CDIF630erm_01146	nagA	N-acetylglucosamine-6-phosphate deacetylase (GlcNAc 6-P deacetylase) (EC 3.5.1.25)	0.46073				-2.05945				Cellular Processes	Energy metabolism	N-acetylneuraminate utilization	CD1009	Cytoplasmic	CD1010	CD630_10100	SigD
CDIF630erm_01147	nagB	Glucosamine-6-phosphate deaminase (EC 3.5.99.6) (GlcN6P deaminase) (GNPDA) (Glucosamine-6-phosphate isomerase)	0.0733091		-2.12754		0.718584		1.15665		Cellular Processes	Energy metabolism	N-acetylneuraminate utilization	CD1009	Cytoplasmic	CD1011	CD630_10110	SigD
CDIF630erm_01149	CD630_10130	Two-component response regulator			OFF	*	1.49113		1.48117		Cellular Processes	Regulation and cell signaling	Uncharacterized two-component system	Other	Cytoplasmic	CD1013	CD630_10130
CDIF630erm_01152	CD630_10160	Transcriptional regulator, MerR family					ON		ON		Cellular Processes	Regulation and cell signaling	Transcriptional regulators	MerR family transcriptional regulators	Cytoplasmic	CD1016	CD630_10160
CDIF630erm_01159	CD630_10230	Putative transcriptional regulator, HTH	-0.648996	*	-0.0182461		-2.05741	*	OFF		Cellular Processes	Stress Response and virulence	Polyamine Metabolism	CD1023	Cytoplasmic	CD1023	CD630_10230	SigB
CDIF630erm_01160	potA	Spermidine/putrescine import ATP-binding protein PotA (EC 7.6.2.11)	-1.98846		-1.7784	*	1.05768		-0.730464		Cellular Processes	Stress Response and virulence	Polyamine Metabolism	CD1023	CytoplasmicMembrane	CD1024	CD630_10240	SigB
CDIF630erm_01163	potD	ABC-type transport system,spermidine/putrescine solute-binding protein	-1.71552		-3.02206	*	0.305515		-1.07777		Cellular Processes	Stress Response and virulence	Polyamine Metabolism	CD1023	Unknown	CD1027	CD630_10270	SigB
CDIF630erm_01175	cwp16	Putative N-acetylmuramoyl-L-alanine amidase,autolysin cwp16 (EC 3.5.1.28)	-0.321259		-1.57998		-1.51591		-2.42553	*	Cell Envelope	Cell wall	SlpA and paralogues	Other	Cellwall	CD1035	CD630_10350	ccpA
CDIF630erm_01177	CD630_10370	Uncharacterized protein	-0.545925		-1.77525		2.40203		1.81213	*	Cellular Processes	DNA and RNA metabolism	DNA repair	CD1037	Cytoplasmic	CD1037	CD630_10370
CDIF630erm_01178	CD630_10380	DNA helicase (EC 3.6.4.12)	-2.26505		-0.598597		-1.27317		1.81856		Cellular Processes	DNA and RNA metabolism	DNA repair	CD1037	Cytoplasmic	CD1038	CD630_10380	ccpA
CDIF630erm_01179	CD630_10390	Uncharacterized protein					ON		3.58278		Cellular Processes	DNA and RNA metabolism	DNA repair	CD1037	Cytoplasmic	CD1039	CD630_10390	SigB
CDIF630erm_01180	addB	ATP-dependent helicase/deoxyribonuclease subunit B (EC 3.1.-.-) (EC 3.6.4.12) (ATP-dependent helicase/nuclease AddB)	-1.49916		-3.07823		-0.123776		2.71824		Cellular Processes	DNA and RNA metabolism	DNA repair	CD1037	CytoplasmicMembrane	CD1040	CD630_10400	SigB
CDIF630erm_01181	addA	ATP-dependent helicase/nuclease subunit A (EC 3.1.-.-) (EC 3.6.4.12) (ATP-dependent helicase/nuclease AddA)	-0.234386		2.40138		1.42352		1.91963		Cellular Processes	DNA and RNA metabolism	DNA repair	CD1037	Cytoplasmic	CD1041	CD630_10410	ccpA; SigB
CDIF630erm_01182	sbcD	Nuclease SbcCD subunit D	-1.8156		-1.45651		2.72536	*	2.23208	*	Cellular Processes	DNA and RNA metabolism	DNA repair	CD1037	Cytoplasmic	CD1042	CD630_10420	ccpA; SigB
CDIF630erm_01183	sbcC	Nuclease SbcCD subunit C	-1.15527		-2.19233		2.8022	*	2.56777	*	Cellular Processes	DNA and RNA metabolism	DNA repair	CD1037	Cytoplasmic	CD1043	CD630_10430	ccpA; SigB
CDIF630erm_01184	CD630_10440	Putative membrane protein	0.189017		-1.52679	*	1.89787	*	0.701424	*	Cellular Processes	Cofactors	Cation transporters	Other	CytoplasmicMembrane	CD1044	CD630_10440
CDIF630erm_01186	pepT	Peptidase T (EC 3.4.11.4) (Aminotripeptidase) (Tripeptidase) (Tripeptide aminopeptidase)	-0.021244		1.05723		-2.06469		-1.86624		Cellular process	Protein folding and degradation	Peptidases	Other	Cytoplasmic	CD1046	CD630_10460	SigB
CDIF630erm_01187	cwp18	Putative cell wall-binding protein cwp18	-0.368867		1.65353		-2.03541		OFF		Cell Envelope	Cell wall	SlpA and paralogues	Other	Cellwall	CD1047	CD630_10470
CDIF630erm_01188	CD630_10480	Phosphoesterase (EC 3.1.4.-)	-0.283517		-0.825052		1.48075	*	-0.0977444		Cellular Processes	Cofactors	NAD and NADP	281013	Cytoplasmic	CD1048	CD630_10480
CDIF630erm_01189	ppnK	NAD kinase (EC 2.7.1.23) (ATP-dependent NAD kinase)	-0.742416		-0.597315		0.978918		0.970488	*	Cellular Processes	Cofactors	NAD and NADP	281013	Cytoplasmic	CD1049	CD630_10490
CDIF630erm_01190	CD630_10500	ABC-type transport system, multidrug-family ATP-binding protein (EC 3.6.3.-)	-1.75697		-1.31399		1.93781		1.53305		Cellular Processes	Stress Response and virulence	Multi-drug transport	Other	CytoplasmicMembrane	CD1050	CD630_10500
CDIF630erm_01193	CD630_10530	YbaK / aminoacyl-tRNA synthetase-associated protein	0.0248263		0.915168		-0.301253		0.797886		Cellular process	Protein synthesis	tRNA metabolism	Other	Cytoplasmic	CD1053	CD630_10530
CDIF630erm_01194	bcd2	butyryl-CoA dehydrogenase, catalytic subunit	0.217286		0.434323		0.0563344		0.324246		Cellular Processes	Energy metabolism	Fermentation	CD1054	Cytoplasmic	CD1054	CD630_10540	SigH; ccpA; Hfq; CodY; SpoA
CDIF630erm_01195	etfB3	butyryl-CoA dehydrogenase, electron transfer flavoprotein beta subunit	0.233761		0.764244	*	-1.29823	*	-0.684265		Cellular Processes	Energy metabolism	Fermentation	CD1054	Cytoplasmic	CD1055	CD630_10550	SigH; Hfq; CodY; SpoA
CDIF630erm_01196	etfA3	Electron transfer flavoprotein subunit alpha	0.277254		0.519713		-0.15617		0.103525		Cellular Processes	Energy metabolism	Fermentation	CD1054	Cytoplasmic	CD1056	CD630_10560	SigH; Hfq; CodY; SpoA
CDIF630erm_01197	crt2	short-chain-enoyl-CoA hydratase	-0.155445		0.643042		-2.22934	*	-3.35125		Cellular Processes	Energy metabolism	Fermentation	CD1054	Cytoplasmic	CD1057	CD630_10570	SigH; Hfq; CodY; SpoA
CDIF630erm_01198	hbd	3-hydroxybutyryl-CoA dehydrogenase (EC 1.1.1.157)	0.461434		0.891017		-1.71002		-2.11318		Cellular Processes	Energy metabolism	Fermentation	CD1054	Unknown	CD1058	CD630_10580	SigH; Hfq; CodY; SpoA
CDIF630erm_01199	thlA	Acetyl-CoA acetyltransferase (EC 2.3.1.9) (Acetoacetyl-CoA thiolase)	0.509793		0.66812		-1.53638		-2.16325		Cellular Processes	Energy metabolism	Fermentation	CD1054	Cytoplasmic	CD1059	CD630_10590	SigH; ccpA; Hfq; CodY; SpoA
CDIF630erm_01201	CD630_10610	nucleoid-associated protein, NdpA-like	-0.0262632		0.572386		-1.23672		-0.25691		Miscellaneous	Miscellaneous	Uncharacterized proteins	Other	Unknown	CD1061	CD630_10610	SigH
CDIF630erm_01207	ccpA	Transcriptional regulator, LacI family	-0.391664		-0.918158		1.27329		1.40383	*	Cellular Processes	Central energy metabolism	Electron transport	Other	Cytoplasmic	CD1064	CD630_10640	SpoA
CDIF630erm_01208	CD630_10650	Uncharacterized protein	-0.0808387		ON		OFF				Miscellaneous	Miscellaneous	Uncharacterized proteins	Other	Unknown	CD1065	CD630_10650	SigF; SigE; SigK; SigB
CDIF630erm_01211	CdeC	Exosporium cysteine rich protein	5.96134		5.76644		0.0598082		1.38765		Cellular Processes	Sporulation and germination	Sporulation and germination	Other	Cytoplasmic	CD1067	CD630_10670	Hfq; SigF; SigE; SigK; SpoA; SigB
CDIF630erm_01213	CD630_10690	Putative histidinol phosphatase/hydrolase, PHP family (EC 3.1.3.15)	OFF				1.93215		ON		Cellular Processes	Amino acid metabolism	Amino acid metabolism	Other	Cytoplasmic	CD1069	CD630_10690
CDIF630erm_01214	CD630_10700	Putative aminotransferase	0.491702		-1.00176		2.08843		1.34739		Miscellaneous	Miscellaneous	Uncharacterized proteins	Other	Cytoplasmic	CD1070	CD630_10700	SigB
CDIF630erm_01216	apeA	aminopeptidase ApeA	-0.663251		-1.02314		-2.11668	*	-4.41102	*	Cellular process	Protein folding and degradation	Peptidases	Other	Cytoplasmic	CD1072	CD630_10720	SigB
CDIF630erm_01218	CD630_10740	PTS system, mannose-type IIA component	-0.81569		-1.30101		2.24863		0.275905		Cellular Processes	Carbohydrate metabolism	Mannose	CD1073	Cytoplasmic	CD1074	CD630_10740
CDIF630erm_01219	CD630_10750	Membrane complex biogenesis protein, btpa family	-1.40238		-2.09324		1.40978		1.22484		Cellular Processes	Carbohydrate metabolism	Mannose	CD1073	Cytoplasmic	CD1075	CD630_10750
CDIF630erm_01223	CD630_10790	Transcriptional regulator, LysR family	0.937171		0.267902		1.92098	*	1.06501	*	Cellular Processes	Regulation and cell signaling	Transcriptional regulators	LysR family transcriptional regulators	Cytoplasmic	CD1079	CD630_10790	SpoA
CDIF630erm_01224	CD630_10800	Putative lipoprotein	-0.872628		-0.454239				OFF		Cell Envelope	Cell membrane	Lipoproteins	Lipoproteins	Unknown	CD1080	CD630_10800	ccpA; SpoA
CDIF630erm_01225	moeA	Molybdopterin molybdenumtransferase (EC 2.10.1.1)	-2.2634		-1.93825		1.38286		1.6428	*	Cellular Processes	Cofactors	Molybdopterin	CD1081	Cytoplasmic	CD1081	CD630_10810
CDIF630erm_01226	mobB	Molybdopterin-guanine dinucleotide biosynthesis protein B	-0.459182			*	2.36078		0.841946		Cellular Processes	Cofactors	Molybdopterin	CD1081	Cytoplasmic	CD1082	CD630_10820
CDIF630erm_01227	CD630_10830	PTS system, galactiol-type IIB component	-0.308019		OFF		1.06566		1.99447		Cellular Processes	Carbohydrate metabolism	Galactitol utilization	Other	Cytoplasmic	CD1083	CD630_10830
CDIF630erm_01228	ywjA	ABC-type transport system, multidrug-family ATP-binding/permease protein (EC 3.6.3.-)	-2.2648		-2.46571	*	0.943224		0.179557		Cellular Processes	Stress Response and virulence	Multi-drug transport	Other	CytoplasmicMembrane	CD1084	CD630_10840	ccpA
CDIF630erm_01229	CD630_10850	Putative membrane protein	-3.40094		-4.04615	*	0.527212		-0.569851		Cell Envelope	Cell membrane	Cell membrane	Other	CytoplasmicMembrane	CD1085	CD630_10850	CodY; SigF; SigE; Fur; SpoA; SigB
CDIF630erm_01230	CD630_10860	Putative peptidase, M20D family (EC 3.5.1.-)	-1.00589		-0.663144		-1.18712		-1.91068		Cellular process	Protein folding and degradation	Peptidases	Other	Cytoplasmic	CD1086	CD630_10860	CodY; SigE; Fur; SpoA; SigB
CDIF630erm_01240	CD630_10970	ABC-type transport system, multidrug-family ATP-binding protein Tn1549-like, CTn4-Orf28 (EC 3.6.3.-)			OFF		-1.22443		0.642979		Cellular Processes	Stress Response and virulence	Multi-drug transport	Other	CytoplasmicMembrane	CD1097	CD630_10970
CDIF630erm_01264	pflD	Formate acetyltransferase (Pyruvate formate-lyase) (EC 2.3.1.54)	-2.92518		-1.98773		0.945313		1.84946	*	Cellular Processes	Central energy metabolism	Conversion of pyruvate to acetyl-CoA	CD1120	Cytoplasmic	CD1120	CD630_11200	Fur
CDIF630erm_01265	pflC	Pyruvate formate-lyase 2-activating enzyme (EC 1.97.1.4)	OFF		OFF		0.246927		1.30789		Cellular Processes	Central energy metabolism	Conversion of pyruvate to acetyl-CoA	CD1120	Cytoplasmic	CD1121	CD630_11210	Fur
CDIF630erm_01266	CD630_11220	Transcriptional regulator, RmlC-type	-0.86467		-1.55443		1.87607	*	1.00563		Cellular Processes	Central energy metabolism	Conversion of pyruvate to acetyl-CoA	CD1120	Cytoplasmic	CD1122	CD630_11220	Fur
CDIF630erm_01267	CD630_11230	Putative phosphoesterase (EC 3.-.-.-)	-0.743183		-1.63644		0.127765		0.212124		Cellular Processes	Cofactors	Phosphate	Other	Cytoplasmic	CD1123	CD630_11230
CDIF630erm_01268	CD630_11240	Uncharacterized protein	OFF		OFF		1.41282		1.58826		Miscellaneous	Miscellaneous	Uncharacterized proteins	Other	Cytoplasmic	CD1124	CD630_11240
CDIF630erm_01270	CD630_11250	putative nitroreductase-like oxidoreductase	-0.265386		0.933595		-1.02273		0.0748096		Cellular Processes	Cofactors	Nitrogen and sulfur metabolism	Other	Cytoplasmic	CD1125	CD630_11250	c-di-GMP; SigB
CDIF630erm_01275	polA	DNA polymerase I (EC 2.7.7.7)	0.159584		-0.502699		1.09775		2.04581	*	Cellular Processes	DNA and RNA metabolism	DNA metabolism	Other	Cytoplasmic	CD1128	CD630_11280	SigF; SigB
CDIF630erm_01277	CD630_11300	Putative lytic transglycosylase-like protein (EC 3.2.1.-)	OFF	*	OFF		-4.40278		-2.79465		Cell Envelope	Cell wall	Cell surface polysaccharides and lipopolysaccharides	Other	Unknown	CD1130	CD630_11300	SigF; SigB
CDIF630erm_01278	CD630_11310	Putative solute-binding lipoprotein	-0.323395		-3.06851	*	1.05966		-0.689241		Cellular Processes	Amino acid metabolism	Uptake of amino acids	Other	Cellwall	CD1131	CD630_11310	SigB
CDIF630erm_01279	copZ	copper chaperone CopZ			ON						Cellular Processes	Cofactors	Cation transporters	Other	Cytoplasmic	CD1132	CD630_11320	SigF
CDIF630erm_01280	CD630_11330	Uncharacterized protein			ON						Miscellaneous	Miscellaneous	Uncharacterized proteins	Other	Cytoplasmic	CD1133	CD630_11330	Hfq; SigF; SigE; SigK; SigB
CDIF630erm_01282	CD630_11350	Putative SH3-domain protein	-0.0485301		-0.928782		-1.65364		-1.11374		Cell Envelope	Cell wall	Cell wall biosynthesis	Other	Cellwall	CD1135	CD630_11350
CDIF630erm_01284	rnfC	Ion-translocating oxidoreductase complex subunit C (EC 7.-.-.-) (Rnf electron transport complex subunit C)	-0.569218		-1.41349	*	0.376049		-0.0352092		Cellular Processes	Central energy metabolism	Electron transport	CD1137	Cytoplasmic	CD1137	CD630_11370	SpoA
CDIF630erm_01285	rnfD	Ion-translocating oxidoreductase complex subunit D (EC 7.-.-.-) (Rnf electron transport complex subunit D)	-1.71446		-3.19027	*	0.323405		-1.04731	*	Cellular Processes	Central energy metabolism	Electron transport	CD1137	CytoplasmicMembrane	CD1138	CD630_11380	SpoA
CDIF630erm_01286	rnfG	Ion-translocating oxidoreductase complex subunit G (EC 7.-.-.-) (Rnf electron transport complex subunit G)	-1.48182		-2.44735	*	-0.0171317		-0.87591		Cellular Processes	Central energy metabolism	Electron transport	CD1137	Unknown	CD1139	CD630_11390	SpoA
CDIF630erm_01287	rnfE	Ion-translocating oxidoreductase complex subunit E (EC 7.-.-.-) (Rnf electron transport complex subunit E)	-0.700485		-2.73015	*	0.215699		OFF		Cellular Processes	Central energy metabolism	Electron transport	CD1137	CytoplasmicMembrane	CD1140	CD630_11400
CDIF630erm_01289	rnfB	Ion-translocating oxidoreductase complex subunit B (EC 7.-.-.-) (Rnf electron transport complex subunit B)	-0.690466		-0.569056		-0.0877825		-0.149049		Cellular Processes	Central energy metabolism	Electron transport	CD1137	Cytoplasmic	CD1142	CD630_11420	SpoA
CDIF630erm_01290	CD630_11430	dTTP/UTP pyrophosphatase (dTTPase/UTPase) (EC 3.6.1.9) (Nucleoside triphosphate pyrophosphatase) (Nucleotide pyrophosphatase) (Nucleotide PPase)	-0.0942874		-0.336772		1.78292		1.08522		Cellular Processes	Cell division and cell death	Cell divisome and elongasom	CD1137	Cytoplasmic	CD1143	CD630_11430	SigB
CDIF630erm_01292	mreB2	Rod shape-determining protein MreB	-0.265473		-0.779482		0.508538		0.460547		Cellular Processes	Cell division and cell death	Cell divisome and elongasom	CD1137	Cytoplasmic	CD1145	CD630_11450
CDIF630erm_01293	mreC	Cell shape-determining protein MreC (Cell shape protein MreC)	-2.52686	*	-2.88453	*	-0.456941		-1.74648	*	Cellular Processes	Cell division and cell death	Cell divisome and elongasom	CD1137	Unknown	CD1146	CD630_11460	SpoA
CDIF630erm_01295	CD630_11480	Putative penicillin-binding protein with a N-terminal TonB-box (EC 2.4.1.129)	-3.31342		-5.54825	*	0.761679		-0.760898	*	Cellular Processes	Cell division and cell death	Cell divisome and elongasom	CD1137	CytoplasmicMembrane	CD1148	CD630_11480	SigH; SpoA
CDIF630erm_01296	minC	Septum site-determining protein MinC	-1.61654		-2.19529		2.18112	*	1.18763	*	Cellular Processes	Cell division and cell death	Cell divisome and elongasom	CD1137	Cytoplasmic	CD1149	CD630_11490	SigH
CDIF630erm_01297	minD	septum site-determining protein MinD (cell division inhibitor MinD)	-0.896127		-1.35827	*	1.833	*	0.987477	*	Cellular Processes	Cell division and cell death	Cell divisome and elongasom	CD1137	CytoplasmicMembrane	CD1150	CD630_11500	SigH
CDIF630erm_01298	minE	Cell division topological specificity factor			OFF		0.244889		-0.676984		Cellular Processes	Cell division and cell death	Cell divisome and elongasom	CD1137	Cytoplasmic	CD1151	CD630_11510	SigH
CDIF630erm_01300	mgsA	Methylglyoxal synthase (MGS) (EC 4.2.3.3)	-0.388362		0.177807		-1.634	*	-1.3983		Cellular Processes	Central energy metabolism	Glyoxylate metabolism	Other	Cytoplasmic	CD1153	CD630_11530	SigH
CDIF630erm_01301	CD630_11540	Transcriptional regulator, PadR family					ON		ON		Cellular Processes	Regulation and cell signaling	Transcriptional regulators	PadR family transcriptional regulators	Cytoplasmic	CD1154	CD630_11540
CDIF630erm_01302	CD630_11550	Uncharacterized protein			OFF				OFF		Miscellaneous	Miscellaneous	Uncharacterized proteins	Other	Cytoplasmic	CD1155	CD630_11550
CDIF630erm_01303	CD630_11560	Uncharacterized protein	0.766687		-0.356291		-4.42295		-3.57324		Miscellaneous	Miscellaneous	Uncharacterized proteins	Other	Unknown	CD1156	CD630_11560
CDIF630erm_01304	fprA	flavo-diiron protein FprA	0.111558		0.907606		-0.686818		0.136562		Cellular Processes	Stress Response and virulence	Oxidative stress	Other	Cytoplasmic	CD1157	CD630_11570
CDIF630erm_01305	CD630_11580	Putative radical SAM-superfamily protein	-1.41924		-1.12707		-1.5671	*	0.390671		Miscellaneous	Miscellaneous	Uncharacterized proteins	Other	Cytoplasmic	CD1158	CD630_11580
CDIF630erm_01306	CD630_11590	Uncharacterized protein	-1.05453		-0.322281		0.181524		1.15477		Miscellaneous	Miscellaneous	Uncharacterized proteins	Other	Cytoplasmic	CD1159	CD630_11590
CDIF630erm_01307	rng	Ribonuclease G (RNase G) (Cytoplasmic axial filament protein) (EC 3.1.4.-)									Cellular Processes	DNA and RNA metabolism	RNA Processing	Other	Cytoplasmic	CD1160	CD630_11600	SigB
CDIF630erm_01308	rplU	50S ribosomal protein L21	-0.518183		-1.03856		0.69562		0.299898		Cellular process	Protein synthesis	Ribosome biogenesis	CD1158	Unknown	CD1161	CD630_11610	SigH
CDIF630erm_01310	rpmA	50S ribosomal protein L27	-1.99855	*	-0.808285		-0.64508		-0.653889		Cellular process	Protein synthesis	Ribosome biogenesis	CD1158	Cytoplasmic	CD1163	CD630_11630	SigH; ccpA
CDIF630erm_01311	obg	GTPase Obg (EC 3.6.5.-) (GTP-binding protein Obg)	-0.891997		-3.38428	*	2.14182	*	0.401945		Cellular process	Protein synthesis	Ribosome biogenesis	CD1158	Cytoplasmic	CD1164	CD630_11640
CDIF630erm_01312	CD630_11650	Rna-binding protein, yhby family	-1.96408	*	-2.12952	*	-0.872864		-1.56921	*	Cellular process	Protein synthesis	Ribosome biogenesis	CD1158	Cytoplasmic	CD1165	CD630_11650	SigH; ccpA
CDIF630erm_01314	hom1	Homoserine dehydrogenase (HDH) (EC 1.1.1.3)			OFF		ON		1.24735		Cellular Processes	Amino acid metabolism	Lysine, threonine, methionine and cysteine metabolism	Lysine, threonine, methionine and cysteine metabolism	Cytoplasmic	CD1166	CD630_11660	SigB
CDIF630erm_01317	CD630_11690	Transcriptional regulator, GntR family	0.0222777		-0.774522		0.408832		-0.186791		Cellular Processes	Regulation and cell signaling	Transcriptional regulators	GntR family transcriptional regulators	Cytoplasmic	CD1169	CD630_11690
CDIF630erm_01318	larA	lactate racemase	ON		ON		ON		ON		Cellular Processes	Carbohydrate metabolism	Lactate fermentation	CD1170	Cytoplasmic	CD1170	CD630_11700	SigH
CDIF630erm_01319	etfB4	lactate dehydrogenase (electron bifurcating), electron transfer flavoprotein beta subunit	0.609727				2.2428		ON		Cellular Processes	Carbohydrate metabolism	Lactate fermentation	CD1170	Cytoplasmic	CD1171	CD630_11710	SigH
CDIF630erm_01320	etfA4	lactate dehydrogenase (electron bifurcating), electron transfer flavoprotein alpha subunit	-0.580867		0.878621		1.12009		1.0815		Cellular Processes	Carbohydrate metabolism	Lactate fermentation	CD1170	Cytoplasmic	CD1172	CD630_11720	SigH
CDIF630erm_01321	CD630_11730	lactate dehydrogenase (electron bifurcating), catalytic subunit	0.897538		0.904562		3.28555		1.59586		Cellular Processes	Carbohydrate metabolism	Lactate fermentation	CD1170	Unknown	CD1173	CD630_11730	SigH
CDIF630erm_01322	tmcAL	tRNA(Met) cytidine acetate ligase (EC 6.3.4.-)							ON		Cellular process	Protein synthesis	tRNA metabolism	Other	Unknown	CD1174	CD630_11740
CDIF630erm_01323	ackA	Acetate kinase (EC 2.7.2.1) (Acetokinase)	0.490164		1.27715		-1.50925		-1.0386		Cellular Processes	Central energy metabolism	Fermentation	Other	Cytoplasmic	CD1175	CD630_11750	ccpA
CDIF630erm_01326	fapR	fatty acid and phospholipid biosynthesis regulator	OFF		OFF		-0.346899		1.79116		Cellular Processes	Fatty Acids	Fatty Acids	CD1177	Cytoplasmic	CD1177	CD630_11770
CDIF630erm_01327	plsX	Phosphate acyltransferase (EC 2.3.1.274) (Acyl-ACP phosphotransacylase) (Acyl-[acyl-carrier-protein]--phosphate acyltransferase) (Phosphate-acyl-ACP acyltransferase)	0.523478		-0.0313465		0.207019		0.29933		Cellular Processes	Fatty Acids	Fatty Acids	CD1177	Cytoplasmic	CD1178	CD630_11780
CDIF630erm_01328	fabH	3-oxoacyl-[acyl-carrier-protein] synthase 3 (EC 2.3.1.180) (3-oxoacyl-[acyl-carrier-protein] synthase III) (Beta-ketoacyl-ACP synthase III) (KAS III)	-1.23835		-2.19038		0.789143		0.980761		Cellular Processes	Fatty Acids	Fatty Acids	CD1177	Cytoplasmic	CD1179	CD630_11790
CDIF630erm_01329	fabK	Enoyl-(Acyl-carrier-protein) reductase II (EC 1.3.1.9)	0.225962		-0.720295		1.25131		1.2227	*	Cellular Processes	Fatty Acids	Fatty Acids	CD1177	Cytoplasmic	CD1180	CD630_11800
CDIF630erm_01330	fabD	Malonyl CoA-acyl carrier protein transacylase (EC 2.3.1.39)	-0.418653		-1.33828		1.85166	*	1.04321	*	Cellular Processes	Fatty Acids	Fatty Acids	CD1177	Cytoplasmic	CD1181	CD630_11810
CDIF630erm_01331	fabG	3-oxoacyl-[acyl-carrier protein] reductase (3-ketoacyl-acyl carrier protein reductase) (EC 1.1.1.100)	-0.625442		0.0776176		-0.452299		0.698958		Cellular Processes	Fatty Acids	Fatty Acids	CD1177	Cytoplasmic	CD1182	CD630_11820
CDIF630erm_01332	acpP1	Acyl carrier protein (ACP)	OFF		OFF		OFF		OFF		Cellular Processes	Fatty Acids	Fatty Acids	CD1177	Cytoplasmic	CD1183	CD630_11830
CDIF630erm_01333	fabF	3-oxoacyl-[acyl-carrier-protein] synthase 2 (EC 2.3.1.179)	-0.533269		-0.177262		0.173842		1.23198		Cellular Processes	Fatty Acids	Fatty Acids	CD1177	CytoplasmicMembrane	CD1184	CD630_11840
CDIF630erm_01334	CD630_11850	Diguanylate kinase			OFF		ON		0.157961		Cellular Processes	Stress Response and virulence	RpoN dependent stress reponse	281047	CytoplasmicMembrane	CD1185	CD630_11850	SigF; SigE
CDIF630erm_01335	CD630_11860	Transcriptional regulator, sigma-54-dependent					ON		ON		Cellular Processes	Stress Response and virulence	RpoN dependent stress reponse	281047	Cytoplasmic	CD1186	CD630_11860	RpoN (EBP)
CDIF630erm_01339	CD630_11900	Putative acetyltransferase (EC 2.3.1.-)	0.235495		-0.139748		1.6248		0.851489		Cellular process	Protein folding and degradation	Protein folding and degradation	Other	Cytoplasmic	CD1190	CD630_11900	SpoA
CDIF630erm_01340	fbp	Fructose-1,6-bisphosphatase class 3 (FBPase class 3) (EC 3.1.3.11) (D-fructose-1,6-bisphosphate 1-phosphohydrolase class 3)	-0.987326		-2.03004		-0.8663		0.66778		Cellular Processes	Energy metabolism	Glycolysis and gluconeogenesis	Other	Cytoplasmic	CD1191	CD630_11910	SigH; SpoA
CDIF630erm_01349	CD630_12000	alkaline shock protein	-0.103965		0.692237		-1.09958		-0.982685		Miscellaneous	Miscellaneous	Uncharacterized proteins	Other	Unknown	CD1200	CD630_12000	ccpA
CDIF630erm_01350	nusB	Transcription antitermination protein NusB (Antitermination factor NusB)	-0.914896		-0.0828251		-1.48506	*	-1.17954		Cellular Processes	DNA and RNA metabolism	RNA Processing	CD1192	Cytoplasmic	CD1201	CD630_12010
CDIF630erm_01351	gcp1	tRNA N6-adenosine threonylcarbamoyltransferase (EC 2.3.1.234)					ON		ON		Cellular process	Protein synthesis	tRNA metabolism	Other	Unknown	CD1202	CD630_12020	SigB
CDIF630erm_01354	ispA	Geranyltranstransferase (EC 2.5.1.10)	0.01434		-0.412131		0.478995		1.0538	*	Cellular Processes	Fatty Acids	Isoprenoid metabolism	CD1192	Cytoplasmic	CD1205	CD630_12050
CDIF630erm_01356	dxs	1-deoxy-D-xylulose-5-phosphate synthase (EC 2.2.1.7) (1-deoxyxylulose-5-phosphate synthase) (DXP synthase) (DXPS)	-1.7612		OFF		0.911891	*	2.24732		Cellular Processes	Fatty Acids	Isoprenoid metabolism	CD1192	Cytoplasmic	CD1207	CD630_12070
CDIF630erm_01357	yqxC	Putative RNA-binding S4-domain protein	-1.10507		-1.25272		1.19306	*	2.67224	*	Cellular Processes	DNA and RNA metabolism	DNA repair	CD1192	Cytoplasmic	CD1208	CD630_12080	SigB
CDIF630erm_01358	recN	DNA repair protein RecN (Recombination protein N)	0.732597		-0.654965		1.08414		1.75137	*	Cellular Processes	DNA and RNA metabolism	DNA repair	CD1192	Cytoplasmic	CD1209	CD630_12090	SigB
CDIF630erm_01359	CD630_12100	Uncharacterized protein			OFF		ON		1.35271		Miscellaneous	Miscellaneous	Uncharacterized proteins	Other	Cytoplasmic	CD1210	CD630_12100
CDIF630erm_01360	CD630_12110	Acetyltransferase CD1211 (EC 2.3.1.-) (GCN5-related N-acetyltransferase) (GNAT)	-0.635472		-0.0818679		-0.519595		-2.07085		Miscellaneous	Miscellaneous	Uncharacterized proteins	Other	Unknown	CD1211	CD630_12110	Hfq
CDIF630erm_01363	spo0A	Stage 0 sporulation protein A homolog	-0.468318		1.11254		-1.29962		-0.793443		Cellular Processes	Sporulation and germination	Sporulation and germination	Other	Cytoplasmic	CD1214	CD630_12140	SigH; ccpA; Hfq
CDIF630erm_01364	CD630_12150	Putative thiamine diphosphokinase	-1.57627		-0.0689884		0.720663		0.281304		Cellular Processes	Cofactors	Phosphate	Other	Cytoplasmic	CD1215	CD630_12150
CDIF630erm_01365	CD630_12160	Uncharacterized protein	-0.970992		-1.68291	*	0.373731		-0.67422		Miscellaneous	Miscellaneous	Uncharacterized proteins	Other	Unknown	CD1216	CD630_12160
CDIF630erm_01366	CD630_12170	Putative glycosyl transferase, family 2 (EC 2.4.1.117)	-1.49846		-0.586575		-0.564073		-0.028894		Cell Envelope	Cell wall	Cell surface polysaccharides and lipopolysaccharides	Other	CytoplasmicMembrane	CD1217	CD630_12170
CDIF630erm_01368	CD630_12190	Uncharacterized protein	-1.68931		-2.5463		1.95162	*	1.08492	*	Miscellaneous	Miscellaneous	Uncharacterized proteins	Other	Unknown	CD1219	CD630_12190
CDIF630erm_01369	nudF	ADP-ribose pyrophosphatase	-0.0707713		-0.0164276		0.8512		0.347538		Cellular Processes	Cofactors	NAD and NADP	Other	Cytoplasmic	CD1220	CD630_12200
CDIF630erm_01371	CD630_12220	tyrosine recombinase, XerD-like			OFF		ON		0.72535		Cellular Processes	Stress Response and virulence	Prophages	Other	Cytoplasmic	CD1222	CD630_12220	SigB
CDIF630erm_01372	deoB	Phosphopentomutase (EC 5.4.2.7) (Phosphodeoxyribomutase)	-0.44868		-0.848216		-0.220094		0.201382		Cellular Processes	DNA and RNA metabolism	Nucleosides and nucleotide metabolism	Other	Cytoplasmic	CD1223	CD630_12230	SigB
CDIF630erm_01373	pupG	Purine nucleoside phosphorylase (EC 2.4.2.1) (Inosine-guanosine phosphorylase)	-1.35778	*	-1.99656	*	-1.0198	*	-0.974094		Cellular Processes	DNA and RNA metabolism	Nucleosides and nucleotide metabolism	Other	Cytoplasmic	CD1224	CD630_12240	SigB
CDIF630erm_01374	pdp	Pyrimidine-nucleoside phosphorylase (EC 2.4.2.2)	-2.58124	*	-0.851306		-1.85805	*	-0.884438		Cellular Processes	DNA and RNA metabolism	Nucleosides and nucleotide metabolism	Other	Cytoplasmic	CD1225	CD630_12250
CDIF630erm_01375	mltG	Endolytic murein transglycosylase (EC 4.2.2.-) (Peptidoglycan polymerization terminase)	-0.557895		0.00625984		-0.713029		-2.53968		Cell Envelope	Cell wall	Cell wall biosynthesis	Other	Unknown	CD1226	CD630_12260	SigB
CDIF630erm_01376	CD630_12270	Putative O-methyltransferase (EC 2.1.1.-)		*	OFF		ON		2.90898		Miscellaneous	Miscellaneous	Uncharacterized proteins	Other	Cytoplasmic	CD1227	CD630_12270
CDIF630erm_01377	yrrO	putative protease YrrO	0.191233		-1.91677		2.74987	*	0.855502		Cellular Processes	Amino acid metabolism	Amino acid metabolism	Other	Cytoplasmic	CD1228	CD630_12280	ccpA
CDIF630erm_01380	CD630_12310	Putative site-specific recombinase			OFF		ON		2.0129		Cellular Processes	DNA and RNA metabolism	DNA metabolism	Other	Cytoplasmic	CD1231	CD630_12310
CDIF630erm_01381	CD630_12320	Putative lipoprotein	-0.520261		-0.477662		-0.252811		-0.950762		Miscellaneous	Miscellaneous	Uncharacterized proteins	Other	Unknown	CD1232	CD630_12320	SigB
CDIF630erm_01386	CD630_12350	Putative phage protein			-1.31121				OFF		Cellular Processes	Stress Response and virulence	Prophages	Other	Unknown	CD1235	CD630_12350
CDIF630erm_01398	efp	Elongation factor P (EF-P)	-1.25593	*	-0.711857		-2.34776	*	-4.76585		Cellular process	Protein synthesis	Translation	CD1246	Cytoplasmic	CD1246	CD630_12460
CDIF630erm_01399	CD630_12470	Uncharacterized protein	-0.356424		-1.21619		2.17785	*	0.739728		Miscellaneous	Miscellaneous	Uncharacterized proteins	CD1246	Cytoplasmic	CD1247	CD630_12470
CDIF630erm_01400	rnc	Ribonuclease 3 (EC 3.1.26.3) (Ribonuclease III) (RNase III)	-0.934094		-0.00258344						Cellular Processes	DNA and RNA metabolism	RNA Processing	Other	Cytoplasmic	CD1248	CD630_12480
CDIF630erm_01401	CD630_12490	Putative radical SAM-superfamily protein			-1.366		1.14394	*	1.78565		Cellular process	Protein folding and degradation	Protein folding and degradation	Other	Cytoplasmic	CD1249	CD630_12490
CDIF630erm_01402	smc	structural maintenance chromosome protein SMC	-1.15581		-2.3088		1.92078	*	2.07316	*	Cellular Processes	Cell division and cell death	Cell division	Other	Cytoplasmic	CD1250	CD630_12500
CDIF630erm_01403	ftsY	Signal recognition particle receptor FtsY (SRP receptor)	-1.10464		-0.567211		-1.73262		-1.07719		Cell Envelope	Cell membrane	Cell membrane	CD1246	CytoplasmicMembrane	CD1251	CD630_12510
CDIF630erm_01405	ffh	Signal recognition particle protein (Fifty-four homolog)	-1.40922		-1.73698		0.186106		0.0658955		Cell Envelope	Cell membrane	Cell membrane	CD1246	CytoplasmicMembrane	CD1252	CD630_12520	Hfq
CDIF630erm_01406	rpsP	30S ribosomal protein S16	-0.00712294		1.51979		-0.81536		-0.0560201		Cellular process	Protein synthesis	Ribosome biogenesis	CD1246	Cytoplasmic	CD1253	CD630_12530
CDIF630erm_01407	CD630_12540	UPF0109 protein CD630_12540	-0.228658		0.985753		-1.00081		0.492624		Miscellaneous	Miscellaneous	Uncharacterized proteins	CD1246	Cytoplasmic	CD1254	CD630_12540	ccpA
CDIF630erm_01408	rimM	16S rRNA processing protein RimM	-1.35589		-2.12859		0.407146		0.714528		Cellular process	Protein synthesis	Ribosome biogenesis	CD1246	Cytoplasmic	CD1255	CD630_12550
CDIF630erm_01410	rplS	50S ribosomal protein L19	-0.984252	*	-0.954964		-0.314552		-0.137701		Cellular process	Protein synthesis	Ribosome biogenesis	CD1246	Cytoplasmic	CD1257	CD630_12570	CodY
CDIF630erm_01411	CD630_12580	Ribosome biogenesis GTPase A	-1.91871		-2.60918		0.803833		1.04639		Cellular process	Protein synthesis	Ribosome biogenesis	Other	Cytoplasmic	CD1258	CD630_12580	CodY
CDIF630erm_01413	brnQ-2	Branched-chain amino acid transport system carrier protein			ON						Cellular Processes	Amino acid metabolism	Amino acid metabolism	Other	CytoplasmicMembrane	CD1260	CD630_12600	CodY; SpoA; SigB
CDIF630erm_01414	nrdZ	Vitamin B12-dependent ribonucleotide reductase (EC 1.17.4.1)	-0.878324		-1.62675	*	1.81096	*	1.2706	*	Cellular Processes	DNA and RNA metabolism	RNA Processing	CD1261	Cytoplasmic	CD1261	CD630_12610	CodY
CDIF630erm_01415	rnhB	Ribonuclease HII (RNase HII) (EC 3.1.26.4)	-1.55751		-1.34399		1.55629		1.56829	*	Cellular Processes	DNA and RNA metabolism	RNA Processing	CD1261	Cytoplasmic	CD1262	CD630_12620	CodY
CDIF630erm_01416	CD630_12630	putative (S)-2-hydroxy-acid oxidase	-0.480121		0.154297		-2.01088		-3.91057		Cellular Processes	Central energy metabolism	Electron transport	Other	Cytoplasmic	CD1263	CD630_12630	CodY
CDIF630erm_01417	CD630_12640	Uncharacterized protein	2.26817	*	3.09265		-0.462818		OFF		Miscellaneous	Miscellaneous	Uncharacterized proteins	Other	Cytoplasmic	CD1264	CD630_12640	SigH; CodY
CDIF630erm_01422	CD630_12690	Two-component response regulator			OFF		ON		0.953543		Cellular Processes	Regulation and cell signaling	Uncharacterized two-component system	Other	Cytoplasmic	CD1269	CD630_12690
CDIF630erm_01427	topA	DNA topoisomerase 1 (EC 5.99.1.2) (DNA topoisomerase I)	-1.48597		-1.00888		0.456547		1.66842	*	Cellular Processes	DNA and RNA metabolism	DNA metabolism	CD1271	Cytoplasmic	CD1274	CD630_12740	SigB
CDIF630erm_01428	codY	GTP-sensing transcriptional pleiotropic repressor CodY	-0.180107		-0.0666949		0.144835		0.711905		Cellular Processes	Stress Response and virulence	Nutrient limitation	Other	Cytoplasmic	CD1275	CD630_12750
CDIF630erm_01429	CD630_12760	Putative replication-associated recombination protein a rara					ON		ON		Cellular Processes	DNA and RNA metabolism	DNA metabolism	CD1271	Cytoplasmic	CD1276	CD630_12760
CDIF630erm_01431	iscR	Transcriptional regulator, Rrf2 family (Transcriptional regulator of cysteine biosynthesis)	-0.0351134		-0.509169		-0.00599752		0.529489		Cellular Processes	Cofactors	Iron-sulfur cluster	CD1271	Unknown	CD1278	CD630_12780
CDIF630erm_01432	iscS2	Cysteine desulfurase IscS (EC 2.8.1.7)	0.370955		-0.470045		1.06908		1.14794	*	Cellular Processes	Cofactors	Iron-sulfur cluster	CD1271	Cytoplasmic	CD1279	CD630_12790	c-di-GMP; SigB
CDIF630erm_01433	CD630_12800	Fe-s iron-sulfur cluster assembly protein, nifu family	-1.04292		-0.945549		0.33041		0.332979		Cellular Processes	Cofactors	Iron-sulfur cluster	CD1271	Unknown	CD1280	CD630_12800	ccpA; c-di-GMP; SigB
CDIF630erm_01434	mnmA	tRNA-specific 2-thiouridylase MnmA (EC 2.8.1.13)	OFF		-0.724418	*	4.24395	*	2.35258		Cellular process	Protein synthesis	tRNA metabolism	Other	Cytoplasmic	CD1281	CD630_12810	ccpA; SigB
CDIF630erm_01436	alaS	Alanine--tRNA ligase (EC 6.1.1.7) (Alanyl-tRNA synthetase) (AlaRS)	0.402881		-0.274606		0.505557		1.24679	*	Cellular process	Protein synthesis	tRNA metabolism	Other	Cytoplasmic	CD1282	CD630_12820
CDIF630erm_01437	CD630_12830	UPF0297 protein CD630_12830	0.762775		1.75236		-0.687853		OFF		Miscellaneous	Miscellaneous	Uncharacterized proteins	CD1282	Cytoplasmic	CD1283	CD630_12830
CDIF630erm_01438	CD630_12840	Putative membrane protein	-2.09145		-4.73267	*	0.661891		-1.34893	*	Miscellaneous	Miscellaneous	Uncharacterized proteins	CD1282	CytoplasmicMembrane	CD1284	CD630_12840
CDIF630erm_01439	CD630_12850	putative holliday junction resolvase	-0.74574		ON		OFF				Cellular Processes	DNA and RNA metabolism	DNA repair	Other	Cytoplasmic	CD1285	CD630_12850	ccpA; SigF
CDIF630erm_01441	fur	Transcriptional regulator, Fur family	-1.08686		-0.0774819		0.591816		0.535483		Cellular Processes	Cofactors	Iron	Other	Cytoplasmic	CD1287	CD630_12870	Fur
CDIF630erm_01443	rnj	Ribonuclease J (RNase J) (EC 3.1.-.-)	-0.542133		-0.341073		-0.358794		0.55094		Cellular Processes	DNA and RNA metabolism	RNA Processing	Other	Cytoplasmic	CD1289	CD630_12890
CDIF630erm_01445	dacF	D-alanyl-D-alanine carboxypeptidase (Penicillin-binding protein) (EC 3.4.16.4)			ON						Cell Envelope	Cell wall	Cell wall biosynthesis	Penicillin-binding proteins	CytoplasmicMembrane	CD1291	CD630_12910	SigH; SigF; SigG; Fur; SigB
CDIF630erm_01446	CD630_12920	peptidyl-tRNA hydrolase					ON		ON		Cellular process	Protein synthesis	tRNA metabolism	Other	Cytoplasmic	CD1292	CD630_12920
CDIF630erm_01448	CD630_12940	Putative membrane-associated peptidase, M25 family	OFF		OFF		-0.443362		OFF		Cell Envelope	Cell membrane	Cell membrane	Other	CytoplasmicMembrane	CD1294	CD630_12940
CDIF630erm_01450	scpB	Segregation and condensation protein B			OFF		1.11408		1.23845		Cellular Processes	Cell division and cell death	Cell division	Other	Cytoplasmic	CD1296	CD630_12960
CDIF630erm_01452	CD630_12980	Putative sporulation protein	OFF		ON		OFF				Cellular Processes	Sporulation and germination	Sporulation and germination	Other	Unknown	CD1298	CD630_12980	SigF; SigG; SigB
CDIF630erm_01453	CD630_12990	Transcriptional regulator, MarR family	-0.241279		-0.872813		2.35045	*	0.794148		Cellular Processes	Regulation and cell signaling	Transcriptional regulators	Other	Cytoplasmic	CD1299	CD630_12990
CDIF630erm_01454	pepA	Probable cytosol aminopeptidase (EC 3.4.11.1) (Leucine aminopeptidase) (LAP) (EC 3.4.11.10) (Leucyl aminopeptidase)	-0.561309		-1.21764	*	-2.36342	*	-4.47219	*	Cellular process	Protein folding and degradation	Peptidases	Other	Cytoplasmic	CD1300	CD630_13000
CDIF630erm_01457	CD630_13020	Putative MazG-like pyrophosphohydrolase	0.185281		OFF	*	3.23785		1.28268		Cellular Processes	Cofactors	Phosphate	Other	Cytoplasmic	CD1302	CD630_13020
CDIF630erm_01458	npdA	NAD-dependent protein deacetylase (EC 3.5.1.-) (Regulatory protein SIR2 homolog)	0.249881		0.115188		1.48112		0.649338		Cellular process	Protein folding and degradation	Protein folding and degradation	Other	Unknown	CD1303	CD630_13030
CDIF630erm_01459	acd	Acd (Mannosyl-glycoprotein endo-beta-N-acetylglucosamidase) (EC 3.2.1.96)	-0.442266		-1.49718		1.3458		1.08599	*	Cellular Processes	Carbohydrate metabolism	Amino sugar metabolism	Other	Extracellular	CD1304	CD630_13040	SigD
CDIF630erm_01460	polC	DNA polymerase III PolC-type (PolIII) (EC 2.7.7.7)	OFF		OFF		-3.26979		2.43801		Cellular Processes	DNA and RNA metabolism	DNA metabolism	CD1305	Cytoplasmic	CD1305	CD630_13050	SigB
CDIF630erm_01461	rimP	Ribosome maturation factor RimP	-0.47004		0.325089		0.118467		-0.341944		Cellular process	Protein synthesis	Ribosome biogenesis	CD1305	Cytoplasmic	CD1306	CD630_13060
CDIF630erm_01462	nusA	transcription elongation protein	-0.387036		-2.38398		2.16505		0.722777		Cellular Processes	DNA and RNA metabolism	DNA metabolism	CD1305	Cytoplasmic	CD1307	CD630_13070	Hfq
CDIF630erm_01464	CD630_13080	Ribosomal protein L7Ae/L30e/S12e/Gadd45	1.00331		1.62414		-0.69538		-0.186476		Cellular process	Protein synthesis	Ribosome biogenesis	CD1305	Cytoplasmic	CD1308	CD630_13080
CDIF630erm_01465	infB	Translation initiation factor IF-2	-0.571662		-0.635112		1.09338	*	1.55312	*	Cellular process	Protein synthesis	Translation	CD1305	Cytoplasmic	CD1309	CD630_13090
CDIF630erm_01466	rbfA	Ribosome-binding factor A	-0.393997		0.974523		-2.10875		-2.23016		Cellular process	Protein synthesis	Ribosome biogenesis	Other	Cytoplasmic	CD1310	CD630_13100
CDIF630erm_01467	CDIF630erm_01467	putative rna-binding protein			-1.23795		0.236755		0.988202		Cellular Processes	Regulation and cell signaling	Transcriptional regulators	Other	Unknown	CD1311	CD630_13110
CDIF630erm_01469	CDIF630erm_01469	putative rna-binding protein	-1.77825		-0.736909		-0.617648		0.535497		Cellular Processes	Regulation and cell signaling	Transcriptional regulators	Other	Cytoplasmic	CD1313	CD630_13130
CDIF630erm_01470	truB	tRNA pseudouridine synthase B (EC 5.4.99.25) (tRNA pseudouridine(55) synthase) (Psi55 synthase) (tRNA pseudouridylate synthase) (tRNA-uridine isomerase)					ON				Cellular process	Protein synthesis	tRNA metabolism	CD1314	Cytoplasmic	CD1314	CD630_13140
CDIF630erm_01471	ribC	Riboflavin biosynthesis protein [Includes: Riboflavin kinase (EC 2.7.1.26) (Flavokinase); FMN adenylyltransferase (EC 2.7.7.2) (FAD pyrophosphorylase) (FAD synthase)]	-0.925576		-0.645712		-1.95706		-0.176485		Cellular Processes	Cofactors	Riboflavin	Other	Cytoplasmic	CD1315	CD630_13150
CDIF630erm_01472	rpsO	30S ribosomal protein S15	-0.865358		1.12395		-0.912794		-0.695225		Cellular process	Protein synthesis	Ribosome biogenesis	CD1314	Cytoplasmic	CD1316	CD630_13160	ccpA
CDIF630erm_01473	CD630_13170	Uncharacterized protein DegV family	-1.26435		-0.350627		-0.251651		0.760841		Cellular Processes	DNA and RNA metabolism	DNA metabolism	Other	Cytoplasmic	CD1317	CD630_13170	SigH
CDIF630erm_01474	pnp	Polyribonucleotide nucleotidyltransferase (EC 2.7.7.8) (Polynucleotide phosphorylase) (PNPase)	-1.12175		-0.623657		-1.81493	*	-1.20784		Cellular Processes	DNA and RNA metabolism	RNA Processing	Other	Cytoplasmic	CD1318	CD630_13180
CDIF630erm_01475	CD630_13190	Putative polysaccharide deacetylase	0.182208		-0.479845				-2.69365		Cellular Processes	Amino acid metabolism	Amino acid metabolism	CD1319	Unknown	CD1319	CD630_13190	SigH; SigF; SigE; SigB
CDIF630erm_01476	CD630_13200	Putative peptidase, M16 family	-1.10798		-1.16278		1.11991		1.741	*	Cellular Processes	Amino acid metabolism	Amino acid metabolism	CD1319	Cytoplasmic	CD1320	CD630_13200	SigF; SigE; SigB
CDIF630erm_01478	dapG	Aspartokinase (EC 2.7.2.4)	-0.676484		-1.59321	*	2.06314	*	1.57412	*	Cellular Processes	Amino acid metabolism	Amino acid metabolism	CD1319	Cytoplasmic	CD1322	CD630_13220	SigF; SigE; SigB
CDIF630erm_01480	ftsK	DNA FtsK/SpoIIIE translocase	-1.41822		-2.09299	*	0.279272		0.0769002		Cellular Processes	DNA and RNA metabolism	DNA metabolism	Other	CytoplasmicMembrane	CD1324	CD630_13240
CDIF630erm_01481	selU	tRNA 2-selenouridine synthase	-0.936982		-2.38946		2.44952		1.78232		Cellular process	Protein synthesis	tRNA metabolism	CD1319	Cytoplasmic	CD1325	CD630_13250
CDIF630erm_01482	rimO	Ribosomal protein S12 methylthiotransferase RimO (S12 MTTase) (S12 methylthiotransferase) (EC 2.8.4.4) (Ribosomal protein S12 (aspartate-C(3))-methylthiotransferase) (Ribosome maturation factor RimO)	-1.53877		-3.68095	*	1.35707		0.865819	*	Cellular process	Protein synthesis	Ribosome biogenesis	CD1319	Cytoplasmic	CD1326	CD630_13260	CodY
CDIF630erm_01483	pgsA	CDP-diacylglycerol--glycerol-3-phosphate 3-phosphatidyltransferase (EC 2.7.8.5)	OFF		OFF		OFF		OFF		Cellular Processes	Fatty Acids	Phospholipid metabolism	Other	CytoplasmicMembrane	CD1327	CD630_13270	CodY
CDIF630erm_01484	recA	Protein RecA (Recombinase A)	0.183099		-0.299525		0.628061		0.570352		Cellular Processes	DNA and RNA metabolism	DNA repair	Other	Cytoplasmic	CD1328	CD630_13280	ccpA; CodY
CDIF630erm_01485	rny	Ribonuclease Y (RNase Y) (EC 3.1.-.-)	-0.791131		-1.57814		0.976389		0.168657		Cellular Processes	DNA and RNA metabolism	RNA Processing	Other	Cytoplasmic	CD1329	CD630_13290	CodY
CDIF630erm_01486	CD630_13300	DNA helicase (EC 3.6.4.12)	-0.500066		-1.27364		0.793489		1.28941	*	Cellular Processes	DNA and RNA metabolism	DNA metabolism	Other	Cytoplasmic	CD1330	CD630_13300
CDIF630erm_01487	sip3	Signal peptidase I (EC 3.4.21.89)			OFF				OFF		Cellular process	Protein Metabolism	Sec secretion	Other	Cellwall	CD1331	CD630_13310
CDIF630erm_01489	CD630_13330	Putative phage tyrosine recombinase	-0.189837		0.281804		1.2199		0.701058		Cellular Processes	Stress Response and virulence	Prophages	Other	Cytoplasmic	CD1333	CD630_13330
CDIF630erm_01490	purB	Adenylosuccinate lyase (ASL) (EC 4.3.2.2) (Adenylosuccinase)	-0.256538		-1.28545		-3.25585	*	-4.8738	*	Cellular Processes	DNA and RNA metabolism	Nucleosides and nucleotide metabolism	Other	Cytoplasmic	CD1334	CD630_13340
CDIF630erm_01491	CD630_13350	Transcriptional regulator, MarR family	-0.604789		0.632107		-1.17106	*	-0.95677		Cellular Processes	Regulation and cell signaling	Transcriptional regulators	MarR family transcriptional regulators	Cytoplasmic	CD1335	CD630_13350	ccpA
CDIF630erm_01493	CD630_13370	Transcriptional regulator, RpiR family		*	OFF		ON		1.97336		Cellular Processes	Carbohydrate metabolism	Amino sugar metabolism	Other	Unknown	CD1337	CD630_13370
CDIF630erm_01494	malH2	maltose-6*-phosphate glucosidase	1.22847		0.025405		1.52746		0.0610852		Cellular Processes	Carbohydrate metabolism	Maltose	Other	Cytoplasmic	CD1338	CD630_13380
CDIF630erm_01495	aspB	Aminotransferase (EC 2.6.1.-)	0.0997244		0.50533		-1.08061		-0.130216		Cellular Processes	Amino acid metabolism	Glutamine, glutamate, aspartate and asparagine metabolism	Glutamine, glutamate, aspartate and asparagine metabolism	Cytoplasmic	CD1339	CD630_13390	SigH; Hfq
CDIF630erm_01496	galT	UDP-glucose---hexose-1-phosphate uridylyltransferase					ON				Cellular Processes	Carbohydrate metabolism	Galactose	Other	Cytoplasmic	CD1340	CD630_13400
CDIF630erm_01497	exoA	Exodeoxyribonuclease (EC 3.1.11.2)							ON		Cellular Processes	DNA and RNA metabolism	DNA repair	Other	Cytoplasmic	CD1341	CD630_13410
CDIF630erm_01498	polC	Exonuclease	-0.147768		-1.4631		-0.113547		0.988594		Cellular Processes	DNA and RNA metabolism	DNA metabolism	Other	Unknown	CD1342	CD630_13420
CDIF630erm_01499	glnA	Glutamine synthetase (EC 6.3.1.2)	-1.86523		-2.09813		-3.3189	*	-4.87398		Cellular Processes	Amino acid metabolism	Glutamine, glutamate, aspartate and asparagine metabolism	Glutamine, glutamate, aspartate and asparagine metabolism	Cytoplasmic	CD1343	CD630_13430
CDIF630erm_01500	ugtP2	processive diacylglycerol beta-glucosyltransferase									Cell Envelope	Cell wall	Cell surface polysaccharides and lipopolysaccharides	Other	Cytoplasmic	CD1344	CD630_13440
CDIF630erm_01501	CD630_13450	Transcriptional regulator, PadR family					ON				Cellular Processes	Regulation and cell signaling	Transcriptional regulators	PadR family transcriptional regulators	Cytoplasmic	CD1345	CD630_13450
CDIF630erm_01502	CD630_13460	putative membrane protein			OFF		ON		0.502963		Miscellaneous	Miscellaneous	Uncharacterized proteins	Other	CytoplasmicMembrane	CD1346	CD630_13460
CDIF630erm_01503	CD630_13470	Uncharacterized protein			OFF				OFF		Miscellaneous	Miscellaneous	Uncharacterized proteins	Other	CytoplasmicMembrane	CD1347	CD630_13470
CDIF630erm_01505	cprA	ABC-type transport system,lantibiotic/multidrug-family ATP-binding protein (EC 3.6.3.-)	ON		-0.160261		ON		-0.879553		Cellular Processes	Stress Response and virulence	Resistance to antimicrobial peptides	Other	CytoplasmicMembrane	CD1349	CD630_13490
CDIF630erm_01509	CD630_13530	Pyridoxal kinase (EC 2.7.1.35)	-1.8459		-1.31903		-0.741841		1.39017	*	Cellular Processes	Cofactors	Pyridoxine	Other	Unknown	CD1353	CD630_13530	Hfq; SigB
CDIF630erm_01511	cspB	Cold shock protein CspB	-0.291436		-0.281976		-0.676294		-0.650978		Cellular Processes	Stress Response and virulence	Resistance to Other stresses than antibiotics	Other	Cytoplasmic	CD1355	CD630_13550	ccpA; Hfq
CDIF630erm_01512	CD630_13560	Putative CBS domain-containing protein	-0.503612		-0.694981		1.87465	*	1.02581	*	Miscellaneous	Miscellaneous	Uncharacterized proteins	Other	Unknown	CD1356	CD630_13560
CDIF630erm_01513	CD630_13570	Peptidylprolyl isomerase (EC 5.2.1.8)	-1.16736		-1.92546		-0.830764		0.545164		Cellular process	Protein folding and degradation	Peptidyl-prolyl cis-trans isomerase	Other	Cytoplasmic	CD1357	CD630_13570	SigH; ccpA; SigB
CDIF630erm_01516	CD630_13600	Transcriptional regulator, Phage-type	OFF				OFF				Cellular Processes	Stress Response and virulence	Prophages	Other	Cytoplasmic	CD1360	CD630_13600
CDIF630erm_01535	CD630_13770	Putative membrane protein	-2.4392		-3.47606	*	0.12223		-1.61847	*	Cell Envelope	Cell membrane	Cell membrane	Other	Unknown	CD1377	CD630_13770
CDIF630erm_01536	CD630_13780	Transcriptional regulator, Phage-type	-0.1865		0.747561		-0.525407		0.231154		Cellular Processes	Stress Response and virulence	Prophages	Other	Cytoplasmic	CD1378	CD630_13780
CDIF630erm_01539	CD630_13790	Transcriptional regulator, Phage-type	0.82862		ON		-0.439585				Cellular Processes	Stress Response and virulence	Prophages	Other	Cytoplasmic	CD1379	CD630_13790	SigH
CDIF630erm_01541	CD630_13810	Transcriptional regulator, TetR family			ON		ON				Cellular Processes	Regulation and cell signaling	Transcriptional regulators	TetR family	Unknown	CD1381	CD630_13810
CDIF630erm_01542	glpK2	Glycerol kinase (EC 2.7.1.30) (ATP:glycerol 3-phosphotransferase) (Glycerokinase) (GK)	-0.0130497		-0.0538388		-0.253965		0.564277		Cellular Processes	Fatty Acids	Phospholipid metabolism	Other	Cytoplasmic	CD1382	CD630_13820
CDIF630erm_01543	CD630_13830	Transcriptional regulator, GntR family	0.26167		1.81163	*	-0.910053		0.0922902		Cellular Processes	Regulation and cell signaling	Transcriptional regulators	GntR family transcriptional regulators	Unknown	CD1383	CD630_13830
CDIF630erm_01544	pxpA	5-oxoprolinase subunit A (5-OPase subunit A) (EC 3.5.2.9) (5-oxoprolinase (ATP-hydrolyzing) subunit A)	-1.16557		-1.53022		-0.563301		0.458085		Cellular Processes	Amino acid metabolism	Amino acid metabolism	Other	Cytoplasmic	CD1384	CD630_13840	ccpA
CDIF630erm_01545	CD630_13850	Probable transporter	-0.296664		-1.63639		-0.95747		-0.642419		Cellular Processes	Cofactors	Cation transporters	CD1384	CytoplasmicMembrane	CD1385	CD630_13850	ccpA
CDIF630erm_01546	kipI	kinase A inhibitor	-0.991588		-1.40425		2.68599	*	1.66546	*	Cellular Processes	Stress Response and virulence	Sporulation and germination	Other	Cytoplasmic	CD1386	CD630_13860	ccpA
CDIF630erm_01548	CDIF630erm_01548	putative trancriptional regulator					ON		ON		Cellular Processes	Regulation and cell signaling	Transcriptional regulators	Other	Cytoplasmic	CD1388	CD630_13880
CDIF630erm_01552	CD630_13920	Putative endoribonuclease	-0.649265		0.22634		OFF		OFF		Miscellaneous	Miscellaneous	Uncharacterized proteins	Other	Cytoplasmic	CD1392	CD630_13920
CDIF630erm_01554	CD630_13940	Putative NAD(P)-binding oxidoreductase,GFO/IDH/MOCA family	-0.527679		-1.94189		2.18938		0.867657		Miscellaneous	Miscellaneous	Uncharacterized proteins	Other	Cytoplasmic	CD1394	CD630_13940
CDIF630erm_01556	CD630_13960	Putative amino acid amidase	-1.30509		-0.883715		-2.14198	*	OFF		Cellular process	Protein folding and degradation	Peptidases	Other	Cytoplasmic	CD1396	CD630_13960	SigE
CDIF630erm_01557	CD630_13970	TsaA-like protein	0.470552		1.62685		1.40054		1.67782		Cellular Processes	Central energy metabolism	Enzyme of central carbon metabolism	Other	Cytoplasmic	CD1397	CD630_13970	SigF; SigE
CDIF630erm_01560	CD630_14000	Uncharacterized protein	-0.454226		-1.08892		0.985149		0.315877		Miscellaneous	Miscellaneous	Uncharacterized proteins	Other	Unknown	CD1400	CD630_14000
CDIF630erm_01561	CD630_14010	Putative isochorismatase (EC 3.-.-.-)	-0.246528		-0.103008		-0.947037		-1.21232		Cellular Processes	Cofactors	NAD and NADP	Other	Cytoplasmic	CD1401	CD630_14010	ccpA
CDIF630erm_01563	CD630_14030	Putative synthetase	0.024372		1.01467		-2.44301		1.00407		Miscellaneous	Miscellaneous	Uncharacterized proteins	Other	Cytoplasmic	CD1403	CD630_14030	SigF; SigE; SpoA; SigB
CDIF630erm_01565	pqqD	putative coenzyme PQQ synthesis protein D	-0.361655		0.0110432		0.245552		0.542199		Cellular Processes	Cofactors	Menaquinone and ubiquinone	Other	Cytoplasmic	CD1404A	CD630_14041
CDIF630erm_01566	CD630_14050	ABC-type transport system, ATP-binding protein (EC 3.6.3.-)	-1.05965		-3.53461		1.6931		1.85616	*	Miscellaneous	Miscellaneous	Uncharacterized proteins	Other	Cytoplasmic	CD1405	CD630_14050
CDIF630erm_01567	CD630_14060	zinc-binding protein	OFF		OFF		OFF		OFF		Miscellaneous	Miscellaneous	Uncharacterized proteins	Other	Unknown	CD1406	CD630_14060
CDIF630erm_01568	CD630_14070	putative bifunctional aromatic-amino-acid transferase / transcription regulator			OFF		ON		0.418862		Cellular Processes	Regulation and cell signaling	Transcriptional regulators	GntR family transcriptional regulators	Cytoplasmic	CD1407	CD630_14070
CDIF630erm_01569	ddl	D-alanine--D-alanine ligase (EC 6.3.2.4) (D-Ala-D-Ala ligase) (D-alanylalanine synthetase)	0.117379		-0.623003		2.25415	*	0.905634		Cell Envelope	Cell wall	Cell wall biosynthesis	Other	Cytoplasmic	CD1408	CD630_14080	SigE
CDIF630erm_01570	cinA	Putative competence-damage inducible protein	-0.785258		-0.0752541		-0.245173		1.24387		Miscellaneous	Miscellaneous	Uncharacterized proteins	281092	Cytoplasmic	CD1409	CD630_14090
CDIF630erm_01571	CD630_14100	Putative hydrolase, HAD superfamily, subfamily IIB (EC 3.1.3.-)	-0.843412		-0.415395		-0.874437		0.0179392		Miscellaneous	Miscellaneous	Uncharacterized proteins	281092	Cytoplasmic	CD1410	CD630_14100
CDIF630erm_01573	CD630_14120	Transcriptional regulator, sigma-54-dependent	OFF	*	-2.6748	*	1.5173	*	0.849216		Cellular Processes	Stress Response and virulence	RpoN dependent stress reponse	Other	Cytoplasmic	CD1412	CD630_14120	RpoN (EBP)
CDIF630erm_01575	CD630_14140	Putative oxidoreductase, Fe-S subunit			OFF		ON		1.5467		Cellular Processes	Central energy metabolism	Electron transport	Other	Cytoplasmic	CD1414	CD630_14140
CDIF630erm_01578	CD630_14170	Putative ATP-binding protein	-0.0365016		0.0632661		0.648761		0.332539		Miscellaneous	Miscellaneous	Uncharacterized proteins	Other	Cytoplasmic	CD1417	CD630_14170	SigH
CDIF630erm_01581	CD630_14190	Diguanylate kinase	1.17069		-0.101058		2.82567	*	1.85011	*	Cellular Processes	Regulation and cell signaling	C-di-GMP signaling	CD1419	CytoplasmicMembrane	CD1419	CD630_14190
CDIF630erm_01583	CD630_14210	Phosphodiesterase			-2.02098	*	3.31761	*	2.54113		Cellular Processes	Regulation and cell signaling	C-di-GMP signaling	CD1419	CytoplasmicMembrane	CD1421	CD630_14210
CDIF630erm_01588	CD630_14250	Putative magnesium transporter	-0.859692		-1.88064	*	0.624937		-0.76545		Cellular Processes	Cofactors	Cation transporters	Other	CytoplasmicMembrane	CD1425	CD630_14250	SpoA
CDIF630erm_01591	CD630_14280	Transcriptional regulator, hxlR family					ON		ON		Cellular Processes	Regulation and cell signaling	Transcriptional regulators	HxlR family transcriptional regulators	Cytoplasmic	CD1428	CD630_14280	ccpA
CDIF630erm_01593	CD630_14290	Putative acyl-CoA N-acyltransferase					ON		ON		Cellular process	Protein folding and degradation	Protein folding and degradation	Other	Unknown	CD1429	CD630_14290
CDIF630erm_01596	CD630_14320	Putative ribonuclease	-0.755052		-1.01897		-0.0549111		0.2499		Cellular Processes	DNA and RNA metabolism	RNA Processing	Other	Unknown	CD1432	CD630_14320
CDIF630erm_01597	cotE	Peroxiredoxin (EC 1.11.1.15) (Thioredoxin peroxidase)	ON		4.75773				OFF		Cellular Processes	Sporulation and germination	Sporulation and germination	Other	Cytoplasmic	CD1433	CD630_14330	Hfq; SigF; SigE; SigK
CDIF630erm_01599	CD630_14350	Uncharacterized protein	OFF	*	-6.17561		0.129983	*	-2.44904		Miscellaneous	Miscellaneous	Uncharacterized proteins	CD1434	CytoplasmicMembrane	CD1435	CD630_14350
CDIF630erm_01600	CD630_14360	Putative hydrolase	-1.91685		-2.13793	*	-2.35433		-3.79423	*	Miscellaneous	Miscellaneous	Uncharacterized proteins	CD1434	Unknown	CD1436	CD630_14360
CDIF630erm_01601	CDIF630erm_01601	homeodomain-like protein	0.889575		0.0127186		1.30169		0.75425		Miscellaneous	Miscellaneous	Uncharacterized proteins	Other	Cytoplasmic	CD1437	CD630_14370
CDIF630erm_01602	CD630_14380	Putative TPR repeat-containing protein	-0.783373		-1.42888		0.0597326		-0.370003		Miscellaneous	Miscellaneous	Uncharacterized proteins	Other	Cytoplasmic	CD1438	CD630_14380	ccpA
CDIF630erm_01604	CD630_14400	Putative transporter, LrgB family			OFF				OFF		Cell Envelope	Cell wall	Peptidoglycan turnover	Other	CytoplasmicMembrane	CD1440	CD630_14400
CDIF630erm_01605	CD630_14410	Putative membrane protein	-1.19479		-1.20172		1.59528		-0.983775		Cell Envelope	Cell membrane	Cell membrane	Other	CytoplasmicMembrane	CD1441	CD630_14410
CDIF630erm_01606	CD630_14420	Putative MORN repeat-containing protein	-1.46199		-2.32968		0.301145		1.11566		Miscellaneous	Miscellaneous	Uncharacterized proteins	Other	Unknown	CD1442	CD630_14420
CDIF630erm_01607	CD630_14430	Putative Ca++-chelating serine protease,SCP-like extracellular domain protein									Cellular process	Protein folding and degradation	Protein folding and degradation	Other	Unknown	CD1443	CD630_14430
CDIF630erm_01609	pabA	aminodeoxychorismate synthase, component 2	OFF		1.36963		1.41802		0.757664		Cellular Processes	Cofactors	Folate and pterines	CD1443	Cytoplasmic	CD1445	CD630_14450
CDIF630erm_01610	pabB	aminodeoxychorismate synthase, component 1	-0.411665		-0.108756		-0.196519		1.33141		Cellular Processes	Cofactors	Folate and pterines	CD1443	Cytoplasmic	CD1446	CD630_14460
CDIF630erm_01611	pabC	aminodeoxychorismate lyase	OFF		OFF		2.51396		1.51102		Cellular Processes	Cofactors	Folate and pterines	CD1443	Unknown	CD1447	CD630_14470	ccpA; SigB
CDIF630erm_01612	CD630_14480	Uncharacterized protein							ON		Cellular Processes	Cofactors	Folate and pterines	CD1443	Cytoplasmic	CD1448	CD630_14480	ccpA; SigB
CDIF630erm_01613	folE	GTP cyclohydrolase 1 (EC 3.5.4.16) (GTP cyclohydrolase I) (GTP-CH-I)	-0.762903		0.227983		-2.30846	*	OFF		Cellular Processes	Cofactors	Folate and pterines	CD1443	Cytoplasmic	CD1449	CD630_14490	SigB
CDIF630erm_01614	folP	Dihydropteroate synthase (DHPS) (EC 2.5.1.15) (Dihydropteroate pyrophosphorylase)	-0.790076		-1.51678		2.55749	*	1.33031	*	Cellular Processes	Cofactors	Folate and pterines	CD1443	Cytoplasmic	CD1450	CD630_14500	SigB
CDIF630erm_01615	folB	7,8-dihydroneopterin aldolase (EC 4.1.2.25)	0.540849				-0.863699				Cellular Processes	Cofactors	Folate and pterines	CD1443	Cytoplasmic	CD1451	CD630_14510	SigB
CDIF630erm_01616	folK	2-amino-4-hydroxy-6-hydroxymethyldihydropteridinepyrophosphokinase (EC 2.7.6.3)	OFF		-1.61927	*	4.66086		1.47122		Cellular Processes	Cofactors	Folate and pterines	CD1443	Cytoplasmic	CD1452	CD630_14520	SigB
CDIF630erm_01617	aroF	3-deoxy-7-phosphoheptulonate synthase	OFF		-0.991574		0.152141		0.715016		Cellular Processes	Amino acid metabolism	Amino acid metabolism	Other	Cytoplasmic	CD1453	CD630_14530	SigB
CDIF630erm_01618	dnaG	DNA primase (EC 2.7.7.-)	-0.429271		-1.83389		1.36205		1.51309	*	Cellular Processes	DNA and RNA metabolism	DNA metabolism	Other	Cytoplasmic	CD1454	CD630_14540
CDIF630erm_01619	sigA1	RNA polymerase sigma factor SigA	-0.521534		-0.692361		-2.10788	*	-1.85496		Cellular Processes	Stress Response and virulence	Universal stress response	Other	Cytoplasmic	CD1455	CD630_14550
CDIF630erm_01620	CD630_14560	Putative SAM-dependent methyltransferase	OFF		0.0163811		2.00971		2.29697		Cellular process	Protein synthesis	tRNA metabolism	Other	Cytoplasmic	CD1456	CD630_14560
CDIF630erm_01621	CD630_14570	GTP cyclohydrolase 1 type 2 homolog	0.0496469		-0.0985407		-2.35765		OFF		Miscellaneous	Miscellaneous	Uncharacterized proteins	CD1454	Cytoplasmic	CD1457	CD630_14570
CDIF630erm_01622	wrbA	Putative flavodoxin protein	0.0349656		1.30753		OFF		OFF		Miscellaneous	Miscellaneous	Uncharacterized proteins	CD1454	Cytoplasmic	CD1458	CD630_14580	SigH; SigB
CDIF630erm_01623	CD630_14590	Putative 5-nitroimidazole antibiotic resistance protein	-0.989637		-0.830987		0.462395		0.783595	*	Cellular Processes	Central energy metabolism	Electron transport	Other	Unknown	CD1459	CD630_14590	Hfq
CDIF630erm_01626	CD630_14620	Transcriptional regulator, GntR family	-0.857391				OFF				Cellular Processes	Regulation and cell signaling	Transcriptional regulators	GntR family transcriptional regulators	Unknown	CD1462	CD630_14620
CDIF630erm_01630	CD630_14660	ABC-type transport system, ATP-binding protein (EC 3.6.3.-)					ON		ON		Cellular Processes	Stress Response and virulence	Resistance to antimicrobial peptides	Other	CytoplasmicMembrane	CD1466	CD630_14660
CDIF630erm_01632	CD630_14680	Putative iron-sulfur protein	-0.561393		-0.794489		0.366905		-0.189634		Cellular Processes	Cofactors	Iron-sulfur cluster	Other	Cytoplasmic	CD1468	CD630_14680
CDIF630erm_01633	cwp20	Putative cell surface protein putative penicillin-binding protein cwp20	-2.30222		-2.33323		-6.04759		-5.52326		Cell Envelope	Cell wall	SlpA and paralogues	Other	Cellwall	CD1469	CD630_14690
CDIF630erm_01635	CD630_14710	Putative membrane protein	-1.12468		-2.88328	*	-0.456824		-0.723985		Cell Envelope	Cell membrane	Cell membrane	Other	CytoplasmicMembrane	CD1471	CD630_14710
CDIF630erm_01638	rbr2	reverse rubrerythrin	0.0651283		0.597731		-1.67869	*	-4.08878	*	Cellular Processes	Stress Response and virulence	Oxidative stress	Other	Cytoplasmic	CD1474	CD630_14740	c-di-GMP
CDIF630erm_01639	CD630_14750	Putative hydrolase	OFF				OFF				Miscellaneous	Miscellaneous	Uncharacterized proteins	Other	Cytoplasmic	CD1475	CD630_14750
CDIF630erm_01640	CD630_14760	Phosphodiesterase	-2.35008		-4.59393		1.27502		-1.85194		Cellular Processes	Regulation and cell signaling	C-di-GMP signaling	Other	CytoplasmicMembrane	CD1476	CD630_14760	CodY
CDIF630erm_01641	feoA	Ferrous iron transport protein			ON		ON		ON		Cellular Processes	Cofactors	Iron	CD1477	Unknown	CD1477	CD630_14770	ccpA; Fur
CDIF630erm_01642	feoA1	Ferrous iron transport protein	3.0948		1.75457		2.37665		1.30774		Cellular Processes	Cofactors	Iron	CD1477	Cytoplasmic	CD1478	CD630_14780	ccpA; Fur
CDIF630erm_01643	feoB1	Ferrous iron transport protein B	ON		ON				ON		Cellular Processes	Cofactors	Iron	CD1477	CytoplasmicMembrane	CD1479	CD630_14790	Fur; c-di-GMP
CDIF630erm_01645	CD630_14810	Putative tryptophan RNA-binding attenuation protein	OFF	*	-3.45318		0.119994		-0.418579		Cellular Processes	Regulation and cell signaling	Transcriptional regulators	Other	CytoplasmicMembrane	CD1481	CD630_14810	SigB
CDIF630erm_01647	ssuB	ABC-type transport system, sulfonates-family ATP-binding protein (EC 3.6.3.-)	OFF		OFF		OFF		OFF		Cellular Processes	Cofactors	Nitrogen and sulfur metabolism	CD1481	CytoplasmicMembrane	CD1483	CD630_14830	SigB
CDIF630erm_01648	ssuA	ABC-type transport system,alkanesulfonates-family extracellular solute-binding protein	-0.0387218		-0.357966		0.0721771		-0.914982		Cellular Processes	Cofactors	Nitrogen and sulfur metabolism	CD1481	CytoplasmicMembrane	CD1484	CD630_14840	SigH; Hfq; SpoA; SigB
CDIF630erm_01650	CD630_14860	Putative lipoprotein			ON						Cell Envelope	Cell membrane	Lipoproteins	Lipoproteins	Unknown	CD1486	CD630_14860	SigF; SigG; SigB
CDIF630erm_01654	metN	ABC-type transport system, methionine-specific ATP-binding protein	OFF		OFF	*	0.977361		-1.70648		Cellular Processes	Amino acid metabolism	Amino acid metabolism	CD1489	CytoplasmicMembrane	CD1489	CD630_14890
CDIF630erm_01655	metI	ABC-type transport system, methionine-specific permease			OFF				-0.930051		Cellular Processes	Amino acid metabolism	Amino acid metabolism	CD1489	CytoplasmicMembrane	CD1490	CD630_14900	ccpA
CDIF630erm_01656	metQ	ABC-type transport system, methionine-specific substrate-binding lipoprotein	-1.28137		-2.0776	*	0.281052		-0.800531		Cellular Processes	Amino acid metabolism	Amino acid metabolism	CD1489	CytoplasmicMembrane	CD1491	CD630_14910
CDIF630erm_01657	CD630_14920	Two-component sensor histidine kinase,sporulation-associated spo0A (EC 2.7.13.3)	-0.792468		OFF	*	2.8849	*	1.66083		Cellular Processes	Regulation and cell signaling	Uncharacterized two-component system	Other	CytoplasmicMembrane	CD1492	CD630_14920	SpoA; SigB
CDIF630erm_01658	CD630_14930	Putative 3-methyladenine DNA glycosylase (EC 3.2.2.-)			ON						Cellular Processes	DNA and RNA metabolism	DNA metabolism	Other	Cytoplasmic	CD1493	CD630_14930	SpoA; SigB
CDIF630erm_01659	CD630_14940	Transcriptional regulator, HTH-type	-0.839864		-0.445074		-0.52039		-0.289462		Cellular Processes	Regulation and cell signaling	Transcriptional regulators	HTH-type transcriptional regulators	Cytoplasmic	CD1494	CD630_14940	SpoA; SigB
CDIF630erm_01660	proC	Pyrroline-5-carboxylate reductase (P5C reductase) (P5CR) (EC 1.5.1.2) (PCA reductase)	-2.5302	*	-1.00097		-1.67466	*	-1.96923		Cellular Processes	Amino acid metabolism	Proline and 4-hydroxyproline metabolism	Other	Cytoplasmic	CD1495	CD630_14950	SpoA; SigB
CDIF630erm_01661	CD630_14960	Uncharacterized protein	0.239624		0.230437		-1.56431		-0.510747		Miscellaneous	Miscellaneous	Uncharacterized proteins	Other	Unknown	CD1496	CD630_14960
CDIF630erm_01662	CD630_14970	Uncharacterized protein	-1.08673		-0.921475		-1.20181		-0.659746		Miscellaneous	Miscellaneous	Uncharacterized proteins	Other	Cytoplasmic	CD1497	CD630_14970
CDIF630erm_01663	sigA2	RNA polymerase sigma factor					ON		ON		Cellular Processes	Stress Response and virulence	Universal stress response	Other	Cytoplasmic	CD1498	CD630_14980	SigH; ccpA; SpoA
CDIF630erm_01667	deoC	Deoxyribose-phosphate aldolase (DERA) (EC 4.1.2.4) (2-deoxy-D-ribose 5-phosphate aldolase) (Phosphodeoxyriboaldolase) (Deoxyriboaldolase)	-0.0853773		-0.0338888		-1.29243		-0.406331		Cellular Processes	DNA and RNA metabolism	Nucleosides and nucleotide metabolism	Other	Cytoplasmic	CD1502	CD630_15020
CDIF630erm_01669	CD630_15040	ABC-type transport system, multidrug-family ATP-binding protein (EC 3.6.3.-)			OFF		ON		2.08372		Cellular Processes	Stress Response and virulence	Multi-drug transport	Other	CytoplasmicMembrane	CD1504	CD630_15040
CDIF630erm_01672	CD630_15070	Putative thioredoxin	-0.0547821		-0.180667		0.169369		-0.954442		Miscellaneous	Miscellaneous	Uncharacterized proteins	Other	CytoplasmicMembrane	CD1507	CD630_15070
CDIF630erm_01674	CD630_15090	Putative lipoprotein									Miscellaneous	Miscellaneous	Uncharacterized proteins	Other	Unknown	CD1509	CD630_15090
CDIF630erm_01675	CD630_15100	LUD-like protein	0.272784		0.368053		-2.05118	*	-2.4626	*	Miscellaneous	Miscellaneous	Uncharacterized proteins	Other	Unknown	CD1510	CD630_15100
CDIF630erm_01676	cotB	Spore coat protein	2.79364		4.32864	*			-2.77537		Cellular Processes	Sporulation and germination	Sporulation and germination	Other	Cytoplasmic	CD1511	CD630_15110	SigH; SigF; SigE; SpoA; SigB
CDIF630erm_01678	panC	Pantothenate synthetase (PS) (EC 6.3.2.1) (Pantoate--beta-alanine ligase) (Pantoate-activating enzyme)	2.22202		1.93733				1.06574		Cellular Processes	Cofactors	Pantothenate and coenzyme A	CD1512	Cytoplasmic	CD1512	CD630_15120
CDIF630erm_01679	panB	3-methyl-2-oxobutanoate hydroxymethyltransferase (EC 2.1.2.11) (Ketopantoate hydroxymethyltransferase) (KPHMT)	0.947962		0.265306		-1.51416		-2.12741		Cellular Processes	Cofactors	Pantothenate and coenzyme A	CD1512	Cytoplasmic	CD1513	CD630_15130	SpoA
CDIF630erm_01680	CD630_15140	Uncharacterized protein	ON		ON						Cellular Processes	Cofactors	Pantothenate and coenzyme A	CD1512	Unknown	CD1514	CD630_15140	SpoA
CDIF630erm_01681	pdcA	Phosphodiesterase	-0.717356		-1.11572		1.04762		1.91996	*	Cellular Processes	Regulation and cell signaling	C-di-GMP signaling	Other	CytoplasmicMembrane	CD1515	CD630_15150	SigH
CDIF630erm_01686	CD630_15190	Putative acyltransferase	-1.93208		-1.46036		2.13319	*	0.993574	*	Miscellaneous	Miscellaneous	Uncharacterized proteins	Other	Cytoplasmic	CD1519	CD630_15190
CDIF630erm_01689	tyrS	Tyrosine--tRNA ligase (EC 6.1.1.1) (Tyrosyl-tRNA synthetase) (TyrRS)	0.0940046		0.0365666		-0.804897		0.246668		Cellular process	Protein synthesis	tRNA metabolism	Other	Cytoplasmic	CD1521	CD630_15210
CDIF630erm_01690	pgdA1	putative peptidoglycan-N-acetylglucosamine deacetylase	1.42192		-0.198558		OFF		OFF		Cell Envelope	Cell wall	Cell wall biosynthesis	Mur	Extracellular	CD1522	CD630_15220	SpoA; SigB
CDIF630erm_01692	rbr3	reverse rubrerythrin	0.0405789		0.498845		-1.88469	*	-4.22737	*	Cellular Processes	Stress Response and virulence	Oxidative stress	CD1524	Cytoplasmic	CD1524	CD630_15240	SpoA; c-di-GMP
CDIF630erm_01693	CD630_15250	Putative iron-sulfur protein			OFF		ON		-0.216825		Cellular Processes	Stress Response and virulence	Oxidative stress	CD1524	Cytoplasmic	CD1525	CD630_15250	SigB
CDIF630erm_01694	pyrC	Dihydroorotase (DHOase) (EC 3.5.2.3)	-0.367154		-0.296776		1.44989	*	1.55011	*	Cellular Processes	DNA and RNA metabolism	Nucleosides and nucleotide metabolism	Other	Cytoplasmic	CD1526	CD630_15260	Hfq; SpoA
CDIF630erm_01695	CD630_15270	ABC-type transport system, permease	-0.792325		-3.36261	*	0.882614		-1.14698	*	Cellular Processes	Stress Response and virulence	Resistance to antimicrobial peptides	CD1527	CytoplasmicMembrane	CD1527	CD630_15270
CDIF630erm_01696	CD630_15280	ABC-type transport system, ATP-binding protein (EC 3.6.3.-)	0.180057		0.269168		0.37164		0.178551		Cellular Processes	Stress Response and virulence	Resistance to antimicrobial peptides	CD1527	CytoplasmicMembrane	CD1528	CD630_15280
CDIF630erm_01697	CD630_15290	ABC-type transport system, permease	-1.30285		-3.28279	*	0.628856		-1.25156	*	Cellular Processes	Stress Response and virulence	Resistance to antimicrobial peptides	CD1527	Unknown	CD1529	CD630_15290
CDIF630erm_01702	ggt	Gamma-glutamyltranspeptidase (EC 2.3.2.2) // cephalosporin acylase	-0.522539		0.425342		-2.18797		-0.707406		Cellular Processes	Stress Response and virulence	Oxidative stress	Other	Extracellular	CD1534	CD630_15340	ccpA
CDIF630erm_01703	sseA	3-mercaptopyruvate sulfurtransferase (EC 2.8.1.2)	-0.118407		0.461116		-1.71233		0.119734		Cellular Processes	Cofactors	Sulfur Metabolism	Other	Cytoplasmic	CD1535	CD630_15350
CDIF630erm_01704	nfnA	NADH-dependent reduced ferredoxin:NADP+ oxidoreductase, subunit alpha	0.0309933		0.129202		-0.356453		0.269224		Cellular Processes	Central energy metabolism	Electron transport	281117	Cytoplasmic	CD1536	CD630_15360	SigH; ccpA
CDIF630erm_01705	nfnB	NADH-dependent reduced ferredoxin:NADP+ oxidoreductase, subunit beta	0.467587		-0.596588		1.32155		0.731107		Cellular Processes	Central energy metabolism	Electron transport	281117	Cytoplasmic	CD1537	CD630_15370	SigH; Hfq
CDIF630erm_01706	CD630_15380	Phosphodiesterase			OFF		ON		2.07158		Cellular Processes	Regulation and cell signaling	Putative signaling protein	Other	CytoplasmicMembrane	CD1538	CD630_15380
CDIF630erm_01709	CD630_15410	Putative drug/sodium antiporter, MATE family			OFF				OFF		Cellular Processes	Stress Response and virulence	Resistance to antimicrobial peptides	Other	CytoplasmicMembrane	CD1541	CD630_15410
CDIF630erm_01710	CD630_15420	Fic family protein	-1.38876		-1.73831		-0.757211		0.636836		Miscellaneous	Miscellaneous	Uncharacterized proteins	Other	Cytoplasmic	CD1542	CD630_15420	SigH
CDIF630erm_01711	azoR	FMN-dependent NADH-azoreductase (EC 1.7.-.-) (Azo-dye reductase) (FMN-dependent NADH-azo compound oxidoreductase)	ON								Cellular Processes	Stress Response and virulence	Oxidative stress	Other	Cytoplasmic	CD1543	CD630_15430	SigB
CDIF630erm_01712	CD630_15431	Uncharacterized protein	2.45797		1.82114		0.69798		0.261716		Miscellaneous	Miscellaneous	Uncharacterized proteins	Other	Cytoplasmic	CD1543.1	CD630_15431
CDIF630erm_01713	CD630_15450	Uncharacterized protein	OFF				OFF				Miscellaneous	Miscellaneous	Uncharacterized proteins	Other	Unknown	CD1545	CD630_15450	ccpA
CDIF630erm_01715	CD630_15461	Uncharacterized protein	-0.38734				2.35844		0.812158		Miscellaneous	Miscellaneous	Uncharacterized proteins	Other	Cytoplasmic	CD1546.1	CD630_15461
CDIF630erm_01716	hisZ	ATP phosphoribosyltransferase regulatory subunit (EC 6.1.1.21)	-0.282186		1.68231		OFF		OFF		Cellular Processes	Amino acid metabolism	Amino acid metabolism	CD1547	Cytoplasmic	CD1547	CD630_15470	CodY
CDIF630erm_01717	hisG	ATP phosphoribosyltransferase (ATP-PRT) (ATP-PRTase) (EC 2.4.2.17)	-0.14111		ON		-1.93128				Cellular Processes	Amino acid metabolism	Amino acid metabolism	CD1547	Cytoplasmic	CD1548	CD630_15480	CodY; SigB
CDIF630erm_01718	hisC	Histidinol-phosphate aminotransferase (EC 2.6.1.9) (Imidazole acetol-phosphate transaminase)	0.408224		-0.242462		2.35901		1.32568		Cellular Processes	Amino acid metabolism	Amino acid metabolism	CD1547	Cytoplasmic	CD1549	CD630_15490	CodY; SigB
CDIF630erm_01719	hisB	Imidazoleglycerol-phosphate dehydratase (IGPD) (EC 4.2.1.19)	-0.0604265		0.983664		-0.922795		OFF		Cellular Processes	Amino acid metabolism	Amino acid metabolism	CD1547	Cytoplasmic	CD1550	CD630_15500	CodY; SigB
CDIF630erm_01720	hisH	Imidazole glycerol phosphate synthase subunit HisH (EC 4.3.2.10) (IGP synthase glutaminase subunit) (EC 3.5.1.2) (IGP synthase subunit HisH) (ImGP synthase subunit HisH) (IGPS subunit HisH)	-0.797055		-0.00170772		0.389202		-0.24793		Cellular Processes	Amino acid metabolism	Amino acid metabolism	CD1547	Cytoplasmic	CD1551	CD630_15510	SigB
CDIF630erm_01721	hisA	1-(5-phosphoribosyl)-5-[(5-phosphoribosylamino)methylideneamino] imidazole-4-carboxamide isomerase (EC 5.3.1.16) (Phosphoribosylformimino-5-aminoimidazole carboxamide ribotide isomerase)	0.444292		1.53095	*	-1.19115		-0.971987		Cellular Processes	Amino acid metabolism	Amino acid metabolism	CD1547	Cytoplasmic	CD1552	CD630_15520	SigB
CDIF630erm_01722	hisF	Imidazole glycerol phosphate synthase subunit HisF (EC 4.3.2.10) (IGP synthase cyclase subunit) (IGP synthase subunit HisF) (ImGP synthase subunit HisF) (IGPS subunit HisF)	0.551526		-0.245019		1.77305	*	0.846672		Cellular Processes	Amino acid metabolism	Amino acid metabolism	CD1547	Cytoplasmic	CD1553	CD630_15530	CodY; SigB
CDIF630erm_01723	hisI	Histidine biosynthesis bifunctional protein HisIE [Includes: Phosphoribosyl-ATP pyrophosphatase (PRA-PH) (EC 3.6.1.31); Phosphoribosyl-AMP cyclohydrolase (PRA-CH) (EC 3.5.4.19)]	-0.376864		-0.122088		1.98056	*	1.01659		Cellular Processes	Amino acid metabolism	Amino acid metabolism	CD1547	Cytoplasmic	CD1554	CD630_15540	SigB
CDIF630erm_01724	steT1	serine / threonine exchanger	OFF		OFF		-0.53856		0.273592		Cellular Processes	Amino acid metabolism	Uptake of amino acids	Other	CytoplasmicMembrane	CD1555	CD630_15550	SigF; SigE; RpoN (Target); SigB
CDIF630erm_01725	CD630_15560	Putative polysaccharide deacetylase	ON		ON						Cellular Processes	Carbohydrate metabolism	Carbohydrate utilization	Other	Unknown	CD1556	CD630_15560
CDIF630erm_01726	CD630_15570	Peptidylprolyl isomerase (EC 5.2.1.8)	OFF		OFF		OFF		OFF		Cellular process	Protein folding and degradation	Protein folding and degradation	Other	CytoplasmicMembrane	CD1557	CD630_15570
CDIF630erm_01730	CD630_15610	Putative xanthine dehydrogenase accessory factor	0.927247		0.256942		0.621539		1.04519		Cellular Processes	DNA and RNA metabolism	Nucleosides and nucleotide metabolism	Other	Cytoplasmic	CD1561	CD630_15610
CDIF630erm_01734	ilvC	Ketol-acid reductoisomerase (NADP(+)) (KARI) (EC 1.1.1.86) (Acetohydroxy-acid isomeroreductase) (AHIR) (Alpha-keto-beta-hydroxylacyl reductoisomerase) (Ketol-acid reductoisomerase type 1) (Ketol-acid reductoisomerase type I)	1.03151		1.13103		2.59576	*	2.30509	*	Cellular Processes	Amino acid metabolism	Amino acid metabolism	281121	Cytoplasmic	CD1565	CD630_15650	CodY; Fur
CDIF630erm_01735	ilvB	Acetolactate synthase (EC 2.2.1.6)			-3.43387		ON		-0.949208		Cellular Processes	Amino acid metabolism	Amino acid metabolism	281121	Cytoplasmic	CD1566	CD630_15660	CodY; Fur
CDIF630erm_01736	cotG	Spore coat protein-manganese catalase (EC 1.11.1.6)			ON						Cellular Processes	Sporulation and germination	Sporulation and germination	Other	Unknown	CD1567	CD630_15670	SigH; SigB
CDIF630erm_01742	CD630_15730	Transcriptional regulator, HTH-type			1.07494		ON		2.5514		Cellular Processes	Regulation and cell signaling	Transcriptional regulators	HTH-type transcriptional regulators	Cytoplasmic	CD1573	CD630_15730
CDIF630erm_01745	CD630_15760	Putative esterase, SGNH hydrolase-type	-0.473866		-0.0437898		-0.120251		0.174799		Cellular Processes	Fatty Acids	Degradation of fatty acids	Other	Cytoplasmic	CD1576	CD630_15760
CDIF630erm_01746	pgm	Alpha-phosphoglucomutase (EC 5.4.2.2)	-0.379476		-0.401461		-1.68677		-2.05365		Cellular Processes	Central energy metabolism	Phosphoglucomutases	Other	Cytoplasmic	CD1577	CD630_15770
CDIF630erm_01748	CD630_15790	Two-component sensor histidine kinase,sporulation-associated spo0A (EC 2.7.13.3)	OFF		-3.88161		3.01352	*	1.59487		Cellular Processes	Regulation and cell signaling	Uncharacterized two-component system	Other	CytoplasmicMembrane	CD1579	CD630_15790	ccpA; SigD; SpoA; SigB
CDIF630erm_01751	hom2	Homoserine dehydrogenase (EC 1.1.1.3)	OFF	*	OFF	*	4.69524		1.37966		Cellular Processes	Amino acid metabolism	Amino acid metabolism	Other	Cytoplasmic	CD1580	CD630_15800	c-di-GMP
CDIF630erm_01752	CD630_15810	Uncharacterized protein	ON		5.01597				OFF		Miscellaneous	Miscellaneous	Uncharacterized proteins	Other	Cytoplasmic	CD1581	CD630_15810	SigH; Hfq; SigB
CDIF630erm_01753	hisD	Histidinol dehydrogenase (HDH) (EC 1.1.1.23)	-0.178043		-0.684507		2.15585		1.50727		Cellular Processes	Amino acid metabolism	Histidine metabolism	Histidine metabolism	Unknown	CD1582	CD630_15820
CDIF630erm_01754	CD630_15830	alpha / beta hydrolase					ON				Miscellaneous	Miscellaneous	Uncharacterized proteins	Other	Cytoplasmic	CD1583	CD630_15830
CDIF630erm_01761	rbsB2	ABC-type transport system, ribose-specific extracellular solute-binding protein	OFF		0.714548		-2.24457		OFF		Cellular Processes	Carbohydrate metabolism	Ribose	Other	Unknown	CD1589	CD630_15890	ccpA; SigB
CDIF630erm_01767	cysK	cysteine synthase					3.93108		1.90421		Cellular Processes	Amino acid metabolism	Amino acid metabolism	Other	Unknown	CD1594	CD630_15940	SigH; Hfq; SigB
CDIF630erm_01770	map2	Methionine aminopeptidase (MAP) (MetAP) (EC 3.4.11.18) (Peptidase M)	1.19977		OFF	*	3.21697	*	1.22842		Cellular process	Protein synthesis	Translation	Other	Unknown	CD1596	CD630_15960
CDIF630erm_01771	zmp	pro-pro endopeptidase					ON		ON		Cellular process	Protein folding and degradation	Peptidases	Other	Cytoplasmic	CD1597	CD630_15970	SigB
CDIF630erm_01776	thiE	Thiamine-phosphate synthase (TP synthase) (TPS) (EC 2.5.1.3) (Thiamine-phosphate pyrophosphorylase) (TMP pyrophosphorylase) (TMP-PPase)	OFF		0.440546		-0.797007		-0.109389		Cellular Processes	Cofactors	Thiamin	Other	Cytoplasmic	CD1601	CD630_16010
CDIF630erm_01777	CD630_16020	PTS system, lactose/cellobiose-family IIB component	0.278949		0.979984		0.998548		1.73297		Cellular Processes	Carbohydrate metabolism	Lactose and cellobiose	Other	Cytoplasmic	CD1602	CD630_16020	SigB
CDIF630erm_01782	CD630_16060	Transcriptional regulator, GntR family					ON				Cellular Processes	Regulation and cell signaling	Transcriptional regulators	Other	Cytoplasmic	CD1606	CD630_16060
CDIF630erm_01788	CD630_16120	Putative amidohydrolase	0.409138		1.19801		-3.02697		-2.07161		Cellular Processes	Cofactors	Nitrogen and sulfur metabolism	Other	Cytoplasmic	CD1612	CD630_16120
CDIF630erm_01789	cotA	Spore coat assembly protein	3.67495		4.29255		-2.8881		OFF		Cellular Processes	Sporulation and germination	Sporulation and germination	Other	Unknown	CD1613	CD630_16130	Hfq; SigE
CDIF630erm_01790	CD630_16140	ABC-type transport system, ATP-binding protein (EC 3.6.3.-)	-0.382694		-1.64411		1.14349		0.288352		Cellular Processes	Cofactors	Cation transporters	281130	CytoplasmicMembrane	CD1614	CD630_16140
CDIF630erm_01791	CD630_16150	ABC-type transport system, permease	-1.09499		-2.93345	*	-0.137508		-0.863983		Cellular Processes	Cofactors	Cation transporters	281130	CytoplasmicMembrane	CD1615	CD630_16150
CDIF630erm_01792	CD630_16160	Phosphodiesterase					ON		ON		Cellular Processes	Regulation and cell signaling	C-di-GMP signaling	Other	CytoplasmicMembrane	CD1616	CD630_16160	Hfq; SigB
CDIF630erm_01793	clnR	Transcriptional regulator, GntR family	-0.0407937				3.2845		ON		Cellular Processes	Stress Response and virulence	Antibiotic resistance	CD1617	Cytoplasmic	CD1617	CD630_16170
CDIF630erm_01794	clnA	ABC-type transport system, multidrug-family ATP-binding protein (EC 3.6.3.-)	-1.27641		-0.51932		0.553014		0.716104		Cellular Processes	Stress Response and virulence	Multi-drug transport	CD1617	CytoplasmicMembrane	CD1618	CD630_16180
CDIF630erm_01797	CD630_16210	Putative mechanosensitive ion channel protein,MscS family					ON		ON		Cellular Processes	Regulation and cell signaling	Putative signaling protein	Other	CytoplasmicMembrane	CD1621	CD630_16210
CDIF630erm_01799	CD630_16220	Peptidase propeptide and ypeb domain protein	0.456715		0.926802		-1.95091		-1.87528		Cellular process	Protein folding and degradation	Peptidases	Other	Unknown	CD1622	CD630_16220	SigH
CDIF630erm_01800	norR	NADH oxidase (H2O-forming)	0.433151		1.15659	*	-1.34307		-0.934479		Cellular Processes	Stress Response and virulence	Oxidative stress	Other	Cytoplasmic	CD1623	CD630_16230	SigH
CDIF630erm_01801	vanR	Two-component response regulator			OFF		ON		1.15172		Cellular Processes	Stress Response and virulence	Antibiotic resistance	Other	Cytoplasmic	CD1624	CD630_16240	SigB
CDIF630erm_01808	sodA	Superoxide dismutase (EC 1.15.1.1)	ON		ON						Cellular Processes	Stress Response and virulence	Oxidative stress	Other	Extracellular	CD1631	CD630_16310	SigH; SigF; SigG; SigB
CDIF630erm_01810	CD630_16330	Putative serine protease					ON		ON		Cellular process	Protein folding and degradation	Protein folding and degradation	Other	Unknown	CD1633	CD630_16330
CDIF630erm_01811	terD	Tellurium resistance protein terD	-0.493588		-0.194891		-0.737579		-0.379429		Cellular Processes	Stress Response and virulence	Resistance to Other stresses than antibiotics	CD1634	Cytoplasmic	CD1634	CD630_16340
CDIF630erm_01812	terD1	Tellurium resistance protein terD1	-0.546713	*	0.0393577		-0.898269	*	-0.276886		Cellular Processes	Stress Response and virulence	Resistance to Other stresses than antibiotics	CD1634	Cytoplasmic	CD1635	CD630_16350
CDIF630erm_01813	terD2	Tellurium resistance protein terD2	-0.868014	*	0.418627		-0.877583	*	-0.956951		Cellular Processes	Stress Response and virulence	Resistance to Other stresses than antibiotics	CD1634	Cytoplasmic	CD1636	CD630_16360
CDIF630erm_01814	CD630_16370	Putative calcium-transporting ATPase (EC 3.6.3.8)	-1.26283		-3.1543	*	0.679352		-0.497758		Miscellaneous	Miscellaneous	Uncharacterized proteins	CD1634	CytoplasmicMembrane	CD1637	CD630_16370
CDIF630erm_01815	CD630_16380	Uncharacterized protein	-1.20921		-3.10096	*	0.0868715		0.191698		Miscellaneous	Miscellaneous	Uncharacterized proteins	CD1634	CytoplasmicMembrane	CD1638	CD630_16380
CDIF630erm_01816	CD630_16390	Putative tellurite associated resistance protein	-0.936052		-2.53992	*	1.9526	*	0.537151	*	Cellular Processes	Stress Response and virulence	Resistance to Other stresses than antibiotics	CD1634	Cytoplasmic	CD1639	CD630_16390
CDIF630erm_01817	CD630_16400	citrate lyase beta subunit-like protein	OFF		OFF		OFF		0.0519869		Miscellaneous	Miscellaneous	Uncharacterized proteins	CD1634	Cytoplasmic	CD1640	CD630_16400
CDIF630erm_01818	CD630_16410	TRSP domain protein			OFF		ON		1.37696		Miscellaneous	Miscellaneous	Uncharacterized proteins	CD1634	Cytoplasmic	CD1641	CD630_16410
CDIF630erm_01819	stiP	cysteine protease	-1.4854		-2.25238		3.38358	*	1.05643		Miscellaneous	Miscellaneous	Uncharacterized proteins	CD1634	Cytoplasmic	CD1642	CD630_16420
CDIF630erm_01820	CD630_16430	putative hydrolase	OFF		OFF		3.49802		2.60416		Miscellaneous	Miscellaneous	Uncharacterized proteins	CD1634	Cytoplasmic	CD1643	CD630_16430
CDIF630erm_01821	CD630_16440	Transcriptional regulator, RmlC-type	-0.0815437		0.718752		0.805929		1.35253		Cellular Processes	Regulation and cell signaling	Transcriptional regulators	RmlC-type	Cytoplasmic	CD1644	CD630_16440
CDIF630erm_01823	CD630_16460	membrane dipeptidase	OFF	*	OFF		2.44037		1.19219		Cellular process	Protein folding and degradation	Peptidases	Other	Cytoplasmic	CD1646	CD630_16460
CDIF630erm_01829	CD630_16520	Putative tellurium resistance protein	-0.942222		0.362177		-1.99963	*	-2.16347		Cellular Processes	Stress Response and virulence	Resistance to Other stresses than antibiotics	CD1652	Cytoplasmic	CD1652	CD630_16520	SigH; ccpA; Hfq
CDIF630erm_01830	CD630_16530	putative D-methionine-binding lipoprotein	-3.07595	*	-3.98336	*	-0.363062		-1.2848	*	Cellular Processes	Amino acid metabolism	Amino acid metabolism	CD1652	CytoplasmicMembrane	CD1653	CD630_16530	SigD
CDIF630erm_01832	lplA	Lipoate--protein ligase (EC 6.3.1.20)	0.219712		-0.954533		2.65151	*	1.02827		Cellular process	Protein folding and degradation	Protein folding and degradation	Other	Cytoplasmic	CD1654	CD630_16540	SigH; Hfq; SpoA; SigB
CDIF630erm_01834	CD630_16550	Putative Na+/H+ antiporter NhaC-like	OFF		OFF				OFF		Cellular Processes	Cofactors	Cation transporters	Other	CytoplasmicMembrane	CD1655	CD630_16550	SigH
CDIF630erm_01838	gcvTPA	glycine cleavage system, subunit A	1.34355	*	2.25735	*	-1.63011		0.250203		Cellular Processes	Amino acid metabolism	Amino acid metabolism	281138	Cytoplasmic	CD1657	CD630_16570	SigH; ccpA; SigD; SpoA
CDIF630erm_01839	gcvPB	glycine cleavage system, subunit B	1.97951	*	1.71898	*	-0.681181		-0.734569		Cellular Processes	Amino acid metabolism	Amino acid metabolism	281138	Cytoplasmic	CD1658	CD630_16580	SigH; SigD; SpoA
CDIF630erm_01840	CD630_16590	Cation-transporting ATPase	ON		0.416945		ON				Cellular Processes	Cofactors	Cation transporters	Other	CytoplasmicMembrane	CD1659	CD630_16590	SpoA
CDIF630erm_01841	ppnP	Pyrimidine/purine nucleoside phosphorylase (EC 2.4.2.2) (Adenosine phosphorylase) (Cytidine phosphorylase) (Guanosine phosphorylase) (EC 2.4.2.15) (Inosine phosphorylase) (Thymidine phosphorylase) (EC 2.4.2.4) (Uridine phosphorylase) (EC 2.4.2.3) (Xanthosine phosphorylase)	0.502635		1.847		0.0886969		1.75257		Cellular Processes	DNA and RNA metabolism	Nucleosides and nucleotide metabolism	Other	Unknown	CD1660	CD630_16600
CDIF630erm_01843	CD630_16620	Uncharacterized protein			OFF		ON		0.977484		Miscellaneous	Miscellaneous	Uncharacterized proteins	Other	Cytoplasmic	CD1662	CD630_16620
CDIF630erm_01844	guaD	Guanine deaminase (Guanase) (Guanine aminase) (Guanine aminohydrolase) (GAH) (EC 3.5.4.3)	1.10486		-0.232041		0.853135		1.14721		Cellular Processes	DNA and RNA metabolism	Nucleosides and nucleotide metabolism	Other	Unknown	CD1663	CD630_16630
CDIF630erm_01848	CD630_16640	Transcriptional regulator, RmlC-type	OFF		OFF		-0.308092		-1.89175		Cellular Processes	Regulation and cell signaling	Transcriptional regulators	RmlC-type	Cytoplasmic	CD1664	CD630_16640
CDIF630erm_01849	cysM	cysteine synthase	-0.202407		-0.843725		2.46263	*	0.714614		Cellular Processes	Amino acid metabolism	Lysine, threonine, methionine and cysteine metabolism	Lysine, threonine, methionine and cysteine metabolism	Cytoplasmic	CD1665	CD630_16650
CDIF630erm_01856	CD630_16710	Two-component response regulator									Cellular Processes	Regulation and cell signaling	Uncharacterized two-component system	Other	Cytoplasmic	CD1671	CD630_16710
CDIF630erm_01859	CD630_16740	Putative NADPH-dependent FMN reductase	-1.66434		-0.734688		0.221452		0.167388		Cellular Processes	Central energy metabolism	Electron transport	Other	Unknown	CD1674	CD630_16740
CDIF630erm_01860	CD630_16750	Transcriptional regulator, hxlR family	-0.320472			*	2.0854		1.37506		Cellular Processes	Regulation and cell signaling	Transcriptional regulators	HxlR family transcriptional regulators	Unknown	CD1675	CD630_16750	SigH; ccpA
CDIF630erm_01864	CD630_16790	Putative flavodoxin					ON				Cellular Processes	Central energy metabolism	Electron transport	Other	Unknown	CD1679	CD630_16790
CDIF630erm_01867	iunH	inosine / uridine-preferring nucleoside hydrolase	-0.612571		-0.360782		-0.0848527		0.580276		Miscellaneous	Miscellaneous	Uncharacterized proteins	CD1682	Cytoplasmic	CD1682	CD630_16820	SigH
CDIF630erm_01869	CD630_16840	Putative radical SAM superfamily protein	-1.07699		-1.80625	*	1.73007	*	0.856603	*	Miscellaneous	Miscellaneous	Uncharacterized proteins	CD1682	Cytoplasmic	CD1684	CD630_16840	SigH
CDIF630erm_01871	CD630_16860	Transcriptional regulator, repressor-like	ON								Cellular Processes	Regulation and cell signaling	Transcriptional regulators	Other	Cytoplasmic	CD1686	CD630_16860
CDIF630erm_01872	CD630_16870	Putative lipoprotein	-0.329332		-2.11263	*	0.164167		-1.01756	*	Cell Envelope	Cell membrane	Cell membrane	Other	Unknown	CD1687	CD630_16870	ccpA
CDIF630erm_01873	CD630_16880	Two-component response regulator			-2.66382		ON		0.985266		Cellular Processes	Regulation and cell signaling	Uncharacterized two-component system	CD1685	Cytoplasmic	CD1688	CD630_16880
CDIF630erm_01874	CD630_16890	Two-component sensor histidine kinase (EC 2.7.13.3)							ON		Cellular Processes	Regulation and cell signaling	Uncharacterized two-component system	CD1685	CytoplasmicMembrane	CD1689	CD630_16890
CDIF630erm_01875	trxA	Thioredoxin	0.138392		1.09414		-1.17155		-0.50204		Cellular Processes	Stress Response and virulence	Oxidative stress	281146	Cytoplasmic	CD1690	CD630_16900	SigD
CDIF630erm_01876	trxB	thioredoxin reductase	-3.72327		-2.64124		1.95892	*	1.91722	*	Cellular Processes	Stress Response and virulence	Oxidative stress	281146	Cytoplasmic	CD1691	CD630_16910	ccpA; SigD
CDIF630erm_01877	CD630_16920	Transcriptional regulator, ArsR family	OFF		OFF		2.65094		1.33701		Cellular Processes	Regulation and cell signaling	Transcriptional regulators	ArsR family transcriptional regulators	Unknown	CD1692	CD630_16920	SigH; ccpA; Hfq
CDIF630erm_01878	CD630_16930	Putative dinitrogenase iron-molybdenum cofactor	-1.28319	*	-0.160383		-1.46263	*	-2.27354		Cellular Processes	Cofactors	Nitrogen and sulfur metabolism	Other	Cytoplasmic	CD1693	CD630_16930	SigH; Hfq
CDIF630erm_01879	CD630_16940	Uncharacterized protein	-0.881901		-1.15427		0.535284		-0.546757		Miscellaneous	Miscellaneous	Uncharacterized proteins	Other	Unknown	CD1694	CD630_16940
CDIF630erm_01881	alsT	Sodium:alanine symporter	-1.22034		-3.49796	*	1.11247		-1.09791	*	Cellular Processes	Amino acid metabolism	Amino acid metabolism	Other	CytoplasmicMembrane	CD1696	CD630_16960	SigH
CDIF630erm_01882	ribH	6,7-dimethyl-8-ribityllumazine synthase (DMRL synthase) (LS) (Lumazine synthase) (EC 2.5.1.78)	ON	*	ON		ON		ON		Cellular Processes	Cofactors	Riboflavin	CD1697	Cytoplasmic	CD1697	CD630_16970	c-di-GMP
CDIF630erm_01883	ribBA	Riboflavin biosynthesis protein RibBA [Includes: 3,4-dihydroxy-2-butanone 4-phosphate synthase (DHBP synthase) (EC 4.1.99.12); GTP cyclohydrolase-2 (EC 3.5.4.25) (GTP cyclohydrolase II)]	ON		ON				ON		Cellular Processes	Cofactors	Riboflavin	CD1697	Cytoplasmic	CD1698	CD630_16980	c-di-GMP
CDIF630erm_01884	ribE	Riboflavin synthase alpha subunit (EC 2.5.1.9)	ON		ON		ON				Cellular Processes	Cofactors	Riboflavin	CD1697	Cytoplasmic	CD1699	CD630_16990
CDIF630erm_01885	ribD	Riboflavin biosynthesis protein RibD [Includes: Diaminohydroxyphosphoribosylaminopyrimidine deaminase (DRAP deaminase) (EC 3.5.4.26) (Riboflavin-specific deaminase); 5-amino-6-(5-phosphoribosylamino)uracil reductase (EC 1.1.1.193) (HTP reductase)]	ON		ON				ON		Cellular Processes	Cofactors	Riboflavin	CD1697	Cytoplasmic	CD1700	CD630_17000
CDIF630erm_01887	recQ	ATP-dependent DNA helicase (EC 3.6.1.-)	OFF		OFF		3.01924		3.56791		Cellular Processes	DNA and RNA metabolism	DNA repair	Other	Cytoplasmic	CD1701	CD630_17010	SigB
CDIF630erm_01896	CD630_17080	Rela/spot domain protein	-0.389858		-1.78457		1.9065	*	1.47475	*	Cellular Processes	Cofactors	Molybdopterin	CD1708	Cytoplasmic	CD1708	CD630_17080	SpoA
CDIF630erm_01897	mobA	molybdopterin-guanine dinucleotide biosynthesis protein A	ON		-1.44779		ON		1.49129		Cellular Processes	Cofactors	Molybdopterin	CD1708	Cytoplasmic	CD1709	CD630_17090
CDIF630erm_01898	CD630_17100	Putative NAD(P)-binding protein	0.864818	*			0.42543		1.03765		Cellular Processes	Cofactors	Molybdopterin	CD1708	Cytoplasmic	CD1710	CD630_17100
CDIF630erm_01899	CD630_17110	UPF0145 protein CD630_17110	-0.0882626		-0.747999	*	0.547885		-1.40376	*	Miscellaneous	Miscellaneous	Uncharacterized proteins	Other	CytoplasmicMembrane	CD1711	CD630_17110
CDIF630erm_01900	moaB	molybdopterin adenylyltransferase	-0.471145		0.104775		-2.8124		OFF		Cellular Processes	Cofactors	Molybdopterin	CD1712	Cytoplasmic	CD1712	CD630_17120	SigB
CDIF630erm_01901	moaA	cyclic pyranopterin monophosphate synthase	-1.70339		-2.46784		1.52615		0.885952		Cellular Processes	Cofactors	Molybdopterin	CD1712	Cytoplasmic	CD1713	CD630_17130	SigB
CDIF630erm_01902	moaC	cyclic pyranopterin monophosphate synthase accessory protein	-1.82759		-2.37356		1.3052		0.921928		Cellular Processes	Cofactors	Molybdopterin	CD1712	Cytoplasmic	CD1714	CD630_17140	SigB
CDIF630erm_01903	CD630_17150	molybdenum cofactor sulfurase	OFF				OFF				Cellular Processes	Cofactors	Molybdopterin	CD1712	Cytoplasmic	CD1715	CD630_17150	SigB
CDIF630erm_01906	CD630_17170	Uncharacterized protein	-1.71611		-2.05955		-1.97667		-2.04324		Miscellaneous	Miscellaneous	Uncharacterized proteins	CD1716	Cytoplasmic	CD1717	CD630_17170	SpoA
CDIF630erm_01907	CD630_17180	Putative hydantoinase	-0.695575		-3.27491	*	0.265292		0.211827		Miscellaneous	Miscellaneous	Uncharacterized proteins	CD1716	Cytoplasmic	CD1718	CD630_17180	SpoA
CDIF630erm_01909	CDIF630erm_01909	putative hydantoinase	-1.6579		-4.31837	*	0.031641		-0.743452		Miscellaneous	Miscellaneous	Uncharacterized proteins	Other	Cytoplasmic	CD1720	CD630_17200
CDIF630erm_01910	CD630_17210	Uncharacterized protein	-1.2612		-1.50739		1.12132		0.162973		Miscellaneous	Miscellaneous	Uncharacterized proteins	CD1721	Unknown	CD1721	CD630_17210
CDIF630erm_01911	CD630_17220	Putative transcriptional regulator									Cellular Processes	Regulation and cell signaling	Transcriptional regulators	CD1721	Cytoplasmic	CD1722	CD630_17220
CDIF630erm_01912	plsC1	putative 1-acyl-sn-glycerol-3-phosphate acyltransferase					ON		ON		Miscellaneous	Miscellaneous	Uncharacterized proteins	CD1721	CytoplasmicMembrane	CD1723	CD630_17230
CDIF630erm_01915	CD630_17260	Uncharacterized protein	ON		ON						Miscellaneous	Miscellaneous	Uncharacterized proteins	Other	Cytoplasmic	CD1726	CD630_17260	SigF; SigE; SigB
CDIF630erm_01917	CD630_17280	Uncharacterized protein	0.38918		-0.405489		2.34991		1.05123		Miscellaneous	Miscellaneous	Uncharacterized proteins	Other	CytoplasmicMembrane	CD1728	CD630_17280
CDIF630erm_01918	CD630_17281	Uncharacterized protein	2.12406	*	2.62954		0.117228				Miscellaneous	Miscellaneous	Uncharacterized proteins	Other	Cytoplasmic	CD1728.1	CD630_17281
CDIF630erm_01921	mrp	Iron-sulfur cluster carrier protein	-0.494158		-0.411093		1.17128	*	0.819017	*	Cellular Processes	Cofactors	Iron-sulfur cluster	Other	Unknown	CD1730	CD630_17300	SigH
CDIF630erm_01922	CD630_17310	Putative acetyltransferase	-0.231059		-0.449617		1.26645		2.3759	*	Miscellaneous	Miscellaneous	Uncharacterized proteins	Other	Cytoplasmic	CD1731	CD630_17310
CDIF630erm_01923	mtbC	dimethylamine corrinoid protein					ON		ON		Cellular Processes	Cofactors	Heme, porphyrin and cobalamin	CD1732	Cytoplasmic	CD1732	CD630_17320
CDIF630erm_01924	hemE	Uroporphyrinogen decarboxylase (URO-D)	OFF		OFF		2.78264		1.05719		Cellular Processes	Cofactors	Heme, porphyrin and cobalamin	CD1732	Cytoplasmic	CD1733	CD630_17330
CDIF630erm_01925	CD630_17340	putative activase of vitamin B12-dependent protein	OFF	*	OFF		-2.63369		-1.35941		Cellular Processes	Cofactors	Heme, porphyrin and cobalamin	CD1732	Cytoplasmic	CD1734	CD630_17340
CDIF630erm_01927	CD630_17360	Transcriptional regulator, HTH-type					ON				Cellular Processes	Regulation and cell signaling	Transcriptional regulators	HTH-type transcriptional regulators	Unknown	CD1736	CD630_17360
CDIF630erm_01930	CD630_17390	Two-component response regulator			OFF		ON		3.12873		Cellular Processes	Regulation and cell signaling	Uncharacterized two-component system	Other	Cytoplasmic	CD1739	CD630_17390	RpoN (EBP)
CDIF630erm_01939	feoA3	Ferrous iron transport protein	OFF		OFF		2.71823		1.56267		Cellular Processes	Cofactors	Iron	Other	Unknown	CD1745A	CD630_17451	Fur
CDIF630erm_01941	add	Adenosine deaminase (EC 3.5.4.4) (Adenosine aminohydrolase)	OFF		0.537844		-1.23268		-1.73418		Cellular Processes	DNA and RNA metabolism	Nucleosides and nucleotide metabolism	Other	Cytoplasmic	CD1747	CD630_17470
CDIF630erm_01943	yjiM	Putative 2-hydroxyacyl-CoA dehydratase (EC 4.2.1.-)	-0.195395		0.536945		-1.69006		-1.74598		Cellular Processes	Central energy metabolism	Fermentation	281161	Cytoplasmic	CD1749	CD630_17490	SigH; Hfq
CDIF630erm_01944	yjiL	Putative CoA enzyme activase	-0.0379302		-0.327082		2.23511	*	1.09465		Cellular Processes	Fatty Acids	Fatty Acids	281161	CytoplasmicMembrane	CD1750	CD630_17500	SigH; Hfq
CDIF630erm_01945	cwp13	Putative cell wall binding protein cwp13	-1.29061		-0.900457		-5.05239		OFF		Cell Envelope	Cell wall	SlpA and paralogues	Other	Cellwall	CD1751	CD630_17510
CDIF630erm_01946	CD630_17511	Uncharacterized protein	2.15837		ON		2.08506				Miscellaneous	Miscellaneous	Uncharacterized proteins	Other	Cytoplasmic	CD1751.1	CD630_17511
CDIF630erm_01947	CD630_17520	Transcriptional regulator, TetR family									Cellular Processes	Regulation and cell signaling	Transcriptional regulators	TetR family	Cytoplasmic	CD1752	CD630_17520	Fur
CDIF630erm_01952	def1	Peptide deformylase (PDF) (EC 3.5.1.88) (Polypeptide deformylase)			OFF		1.36221		0.229038		Cellular process	Protein synthesis	Translation	Other	Cytoplasmic	CD1756	CD630_17560
CDIF630erm_01954	CD630_17580	Putative radical SAM superfamily protein					ON		ON		Cellular Processes	DNA and RNA metabolism	DNA metabolism	Other	Unknown	CD1758	CD630_17580
CDIF630erm_01955	CD630_17590	Methyltransferase domain protein	1.91001		1.60938		0.748696		2.04093		Cellular Processes	Cofactors	Menaquinone and ubiquinone	Other	Cytoplasmic	CD1759	CD630_17590
CDIF630erm_01957	CD630_17610	Putative phenazine biosynthesis PhzC/PhzF protein	-1.27604		0.134666		0.277454		OFF		Cellular Processes	Stress Response and virulence	Virulence	Other	Unknown	CD1761	CD630_17610	CodY
CDIF630erm_01961	CD630_17640	Putative phenylalanyl-tRNA synthetase beta chain	-0.276336		-0.0130659		0.789003		0.943354	*	Cellular process	Protein synthesis	tRNA metabolism	Other	Cytoplasmic	CD1764	CD630_17640
CDIF630erm_01964	gapB	Glyceraldehyde-3-phosphate dehydrogenase (EC 1.2.1.-)	OFF		OFF		-1.16503		-0.841042		Cellular Processes	Energy metabolism	Glycolysis and gluconeogenesis	Other	Cytoplasmic	CD1767	CD630_17670
CDIF630erm_01965	CD630_17680	Putative membrane protein	-1.13075		-3.16142	*	0.477393		-1.02271	*	Cell Envelope	Cell membrane	Cell membrane	Other	CytoplasmicMembrane	CD1768	CD630_17680	ccpA; CodY; SpoA; SigB
CDIF630erm_01966	CD630_17690	Putative CoA enzyme activase	-0.867923		-2.84659	*	2.71274	*	1.869	*	Cellular Processes	Fatty Acids	Fatty Acids	Other	Cytoplasmic	CD1769	CD630_17690	SigB
CDIF630erm_01967	ogt2	Methylated-DNA-[protein]-cysteine S-methyltransferase 2 (EC 2.1.1.63)	OFF		0.101892		0.147341		-0.134813		Cellular Processes	DNA and RNA metabolism	DNA metabolism	Other	Cytoplasmic	CD1770	CD630_17700
CDIF630erm_01968	CD630_17710	Putative monooxygenase	-1.38125		-0.981381		3.33439	*	1.8555	*	Cellular Processes	Cell division and cell death	Cell division	Other	Cytoplasmic	CD1771	CD630_17710	SigB
CDIF630erm_01969	CD630_17720	Uncharacterized protein			-1.34947		1.67255		1.15071		Miscellaneous	Miscellaneous	Uncharacterized proteins	Other	Unknown	CD1772	CD630_17720
CDIF630erm_01972	CD630_17740	ABC-type transport system, aminoacid-family extracellular solute-binding protein	-1.81105		-1.85767	*	-0.790268		-1.55244	*	Cellular Processes	Amino acid metabolism	Uptake of amino acids	CD1774	Unknown	CD1774	CD630_17740
CDIF630erm_01974	CD630_17760	ABC-type transport system, aminoacid-family ATP-binding protein (EC 3.6.3.-)			OFF				OFF		Cellular Processes	Amino acid metabolism	Uptake of amino acids	CD1774	CytoplasmicMembrane	CD1776	CD630_17760
CDIF630erm_01975	CD630_17770	Putative arsenate reductase	0.415106		0.627504		0.693756		1.30488		Miscellaneous	Miscellaneous	Uncharacterized proteins	Other	Unknown	CD1777	CD630_17770	c-di-GMP
CDIF630erm_01977	larE	Ni2+ transfer protein	-2.37545		-1.19493		0.929288		1.0072		Cellular Processes	Carbohydrate metabolism	Lactate fermentation	Other	Cytoplasmic	CD1779	CD630_17790
CDIF630erm_01978	CD630_17800	Putative RNA methylase	-0.323562		-0.991914		0.806731		1.39183	*	Miscellaneous	Miscellaneous	Uncharacterized proteins	Other	Cytoplasmic	CD1780	CD630_17800	ccpA
CDIF630erm_01979	CD630_17810	Putative lipoprotein	-1.06826		-3.05424		1.98548	*	-0.253078		Cell Envelope	Cell membrane	Cell membrane	Other	Unknown	CD1781	CD630_17810
CDIF630erm_01980	CD630_17820	Two-component response regulator	-0.925916		-0.700094		0.543936		0.897027		Cellular Processes	Regulation and cell signaling	Uncharacterized two-component system	CD1779	Cytoplasmic	CD1782	CD630_17820
CDIF630erm_01981	CD630_17830	Two-component sensor histidine kinase	-0.513068		-2.23892	*	0.882335		0.272858		Cellular Processes	Regulation and cell signaling	Uncharacterized two-component system	CD1779	CytoplasmicMembrane	CD1783	CD630_17830
CDIF630erm_01982	truA2	tRNA pseudouridine synthase A (EC 5.4.99.12) (tRNA pseudouridine(38-40) synthase) (tRNA pseudouridylate synthase I) (tRNA-uridine isomerase I)	3.57167		OFF		-1.50036		0.248897		Cellular process	Protein synthesis	tRNA metabolism	Other	Cytoplasmic	CD1784	CD630_17840
CDIF630erm_01984	argG	Argininosuccinate synthase (EC 6.3.4.5) (Citrulline--aspartate ligase)	0.843906		0.675527		-1.74288		OFF		Cellular Processes	Amino acid metabolism	Amino acid metabolism	Other	Cytoplasmic	CD1785	CD630_17850	ccpA
CDIF630erm_01990	CD630_17910	Uncharacterized protein			ON		ON		ON		Miscellaneous	Miscellaneous	Uncharacterized proteins	Other	Unknown	CD1791	CD630_17910
CDIF630erm_01991	tdh	L-threonine 3-dehydrogenase	-0.112816		-0.639572		1.75519	*	0.653751		Cellular Processes	Amino acid metabolism	Lysine, threonine, methionine and cysteine metabolism	Lysine, threonine, methionine and cysteine metabolism	Cytoplasmic	CD1792	CD630_17920
CDIF630erm_01992	CD630_17930	Putative oxidoreductase							ON		Miscellaneous	Miscellaneous	Uncharacterized proteins	Other	Unknown	CD1793	CD630_17930	ccpA
CDIF630erm_01995	CD630_17960	Putative nitrite and sulfite reductase subunit	1.38671		1.46825		1.14279		0.707754		Cellular Processes	Cofactors	Pantothenate and coenzyme A	281170	Cytoplasmic	CD1796	CD630_17960	SigH; SpoA
CDIF630erm_01996	CD630_17970	Coenzyme A disulfide reductase (CoA-disulfide reductase) (CoADR) (EC 1.8.1.14)	2.90015	*	2.41771		-0.363346		0.455492		Cellular Processes	Cofactors	Pantothenate and coenzyme A	281170	Cytoplasmic	CD1797	CD630_17970	SigH; SpoA
CDIF630erm_01997	CD630_17980	Transcriptional regulator, LysR family	OFF		OFF		0.548123		-2.1669		Cellular Processes	Regulation and cell signaling	Transcriptional regulators	LysR family transcriptional regulators	Cytoplasmic	CD1798	CD630_17980	ccpA
CDIF630erm_01998	terD3	Tellurium resistance protein terD3	0.194451		0.103011		-0.097718		0.273633		Cellular Processes	Stress Response and virulence	Resistance to Other stresses than antibiotics	281171	Cytoplasmic	CD1799	CD630_17990
CDIF630erm_01999	terD4	Tellurium resistance protein terD4	0.0174194		0.222362		-0.792757	*	-1.422	*	Cellular Processes	Stress Response and virulence	Resistance to Other stresses than antibiotics	281171	Cytoplasmic	CD1800	CD630_18000
CDIF630erm_02000	CD630_18010	Putative membrane protein	OFF		OFF		OFF		OFF		Cell Envelope	Cell membrane	Cell membrane	Other	CytoplasmicMembrane	CD1801	CD630_18010	SigH; ccpA
CDIF630erm_02001	CD630_18020	Putative hydrolase, metallo-beta-lactamase superfamily	ON		ON						Cell Envelope	Cell wall	Peptidoglycan turnover	Other	Unknown	CD1802	CD630_18020	CodY
CDIF630erm_02002	cwp23	Putative cell wall-binding protein cwp23							ON		Cell Envelope	Cell wall	SlpA and paralogues	Other	Cellwall	CD1803	CD630_18030	CodY
CDIF630erm_02003	scrR	Transcriptional regulator, LacI family	-0.691402		0.607586		-1.15299		0.545747		Cellular Processes	Carbohydrate metabolism	Sucrose	Other	Cytoplasmic	CD1804	CD630_18040
CDIF630erm_02006	CD630_18070	Putative NADPH-dependent FMN reductase	-0.283977		0.652808		OFF		OFF		Cellular Processes	Central energy metabolism	Electron transport	Other	Cytoplasmic	CD1807	CD630_18070	ccpA
CDIF630erm_02007	CD630_18080	Pyridoxal-dependent decarboxylase, group IV decarboxylase family (EC 4.1.1.20)									Cellular Processes	Amino acid metabolism	Lysine, threonine, methionine and cysteine metabolism	Lysine, threonine, methionine and cysteine metabolism	Cytoplasmic	CD1808	CD630_18080
CDIF630erm_02010	CD630_18100	Transcriptional regulator, beta-lactams repressor	-0.707562		-0.827592		0.978054		0.721674		Cellular Processes	Regulation and cell signaling	Transcriptional regulators	Beta-lactams repressors	Cytoplasmic	CD1810	CD630_18100
CDIF630erm_02012	CDIF630erm_02012	LytTR DNA-binding domain protein					ON		ON		Miscellaneous	Miscellaneous	Uncharacterized proteins	Other	Unknown	CD1812	CD630_18120
CDIF630erm_02013	CD630_18130	Uncharacterized protein	-2.73378		-2.93438		2.46472	*	1.12657	*	Miscellaneous	Miscellaneous	Uncharacterized proteins	Other	Cytoplasmic	CD1813	CD630_18130
CDIF630erm_02014	CD630_18140	Putative phosphoglycerate mutase	-0.404379		-0.549055		0.128713		0.00814775		Cellular Processes	Fatty Acids	Isoprenoid metabolism	CD1814	Cytoplasmic	CD1814	CD630_18140
CDIF630erm_02015	CD630_18150	Uncharacterized protein	-1.68682		OFF		1.47307	*	2.0969		Cellular Processes	Fatty Acids	Fatty Acids	CD1814	Unknown	CD1815	CD630_18150
CDIF630erm_02016	cmk	Cytidylate kinase (CK) (EC 2.7.4.25) (Cytidine monophosphate kinase) (CMP kinase)	0.0449628		-0.66527		-0.583207		0.701597		Cellular Processes	Fatty Acids	Fatty Acids	CD1814	Cytoplasmic	CD1816	CD630_18160	SigB
CDIF630erm_02017	plsC2	1-acyl-sn-glycerol-3-phosphate acyltransferase (EC 2.3.1.51)	-1.44074		-1.44345		-0.000961141		-0.961175		Cellular Processes	Fatty Acids	Phospholipid metabolism	CD1814	Cytoplasmic	CD1817	CD630_18170	SigB
CDIF630erm_02018	ispH	4-hydroxy-3-methylbut-2-enyl diphosphate reductase (HMBPP reductase) (EC 1.17.7.4)	-0.119912		-1.67343		2.0418		1.32993	*	Cellular Processes	Fatty Acids	Isoprenoid metabolism	CD1814	Cytoplasmic	CD1818	CD630_18180	SigB
CDIF630erm_02022	ade	adenine deaminase			OFF		ON		0.950357		Cellular Processes	DNA and RNA metabolism	Nucleosides and nucleotide metabolism	Other	Cytoplasmic	CD1820	CD630_18200
CDIF630erm_02023	bcp	Putative thiol peroxidase (EC 1.11.1.15)	0.284482		1.14947	*	-2.22188	*	OFF		Cellular Processes	Stress Response and virulence	Oxidative stress	Other	Cellwall	CD1822	CD630_18220	c-di-GMP; SigB
CDIF630erm_02025	CD630_18240	P-type calcium transport ATPase (EC 3.6.3.8)			OFF				-0.623327		Cellular Processes	Cofactors	Cation transporters	Other	CytoplasmicMembrane	CD1824	CD630_18240	c-di-GMP
CDIF630erm_02027	metY	O-acetylhomoserine sulfhydrylase (EC 2.5.1.49)	-1.22524		-1.60879		-0.270553		0.371228		Cellular Processes	Amino acid metabolism	Amino acid metabolism	Other	Cytoplasmic	CD1825	CD630_18250	SpoA
CDIF630erm_02029	CD630_18270	Transcriptional regulator, MarR family							ON		Cellular Processes	Regulation and cell signaling	Transcriptional regulators	MarR family transcriptional regulators	Cytoplasmic	CD1827	CD630_18270
CDIF630erm_02030	ftsH1	ATP-dependent zinc metalloprotease FtsH (EC 3.4.24.-)	-0.243126		-1.69448	*	0.971298		-0.169603		Cellular process	Protein folding and degradation	Protein folding and degradation	Other	CytoplasmicMembrane	CD1828	CD630_18280
CDIF630erm_02031	kdpD	Two-component sensor histidine kinase KdpD (EC 2.7.3.-)					1.05165				Cellular Processes	Cofactors	Cation transporters	281178	CytoplasmicMembrane	CD1829	CD630_18290
CDIF630erm_02032	kdpE	Two-component response regulator KdpE	OFF		-0.315754	*	OFF		1.01739		Cellular Processes	Cofactors	Cation transporters	281178	Cytoplasmic	CD1830	CD630_18300
CDIF630erm_02034	aroF1	3-deoxy-D-arabino-heptulosonate 7-phosphate synthase (EC 2.5.1.54)	-0.180232		0.245048		2.34359		1.69665		Cellular Processes	Amino acid metabolism	Amino acid metabolism	CD1832	Cytoplasmic	CD1832	CD630_18320	CodY
CDIF630erm_02035	aroB	3-dehydroquinate synthase (DHQS) (EC 4.2.3.4)	-1.45906		-1.49862		1.46273		0.96823		Cellular Processes	Amino acid metabolism	Amino acid metabolism	CD1832	Cytoplasmic	CD1833	CD630_18330
CDIF630erm_02036	aroA	3-phosphoshikimate 1-carboxyvinyltransferase (EC 2.5.1.19) (5-enolpyruvylshikimate-3-phosphate synthase) (EPSP synthase) (EPSPS)	1.18074		-0.724945		1.12152		0.340634		Cellular Processes	Amino acid metabolism	Amino acid metabolism	CD1832	Cytoplasmic	CD1834	CD630_18340	SpoA
CDIF630erm_02037	aroC	Chorismate synthase (CS) (EC 4.2.3.5) (5-enolpyruvylshikimate-3-phosphate phospholyase)	0.0827497		1.18155		-0.444153		1.23222		Cellular Processes	Amino acid metabolism	Amino acid metabolism	CD1832	Cytoplasmic	CD1835	CD630_18350
CDIF630erm_02038	pheA	Bifunctional P-protein, chorismate mutase/prephenate dehydratase (EC 4.2.1.51) (EC 5.4.99.5)	-1.31927		-0.445679		-2.06076		OFF		Cellular Processes	Amino acid metabolism	Amino acid metabolism	CD1832	Cytoplasmic	CD1836	CD630_18360
CDIF630erm_02039	aroE1	Shikimate dehydrogenase (NADP(+)) (SDH) (EC 1.1.1.25)	-1.20453		-1.731		2.34571	*	1.35919	*	Cellular Processes	Amino acid metabolism	Amino acid metabolism	CD1832	Cytoplasmic	CD1837	CD630_18370
CDIF630erm_02040	aroK	Shikimate kinase (SK) (EC 2.7.1.71)	-0.660422		-0.999886		2.30396	*	0.944003		Cellular Processes	Amino acid metabolism	Amino acid metabolism	CD1832	Cytoplasmic	CD1838	CD630_18380
CDIF630erm_02041	tyrC	Prephenate dehydrogenase (EC 1.3.1.12)	OFF		OFF		1.66042		0.897222		Cellular Processes	Amino acid metabolism	Amino acid metabolism	CD1832	Cytoplasmic	CD1839	CD630_18390
CDIF630erm_02043	CD630_18410	Diguanylate kinase		*	-2.50628	*	2.13017	*	1.70969		Cellular Processes	Regulation and cell signaling	C-di-GMP signaling	Other	CytoplasmicMembrane	CD1841	CD630_18410
CDIF630erm_02044	CD630_18420	Uncharacterized protein			OFF				OFF		Miscellaneous	Miscellaneous	Uncharacterized proteins	Other	CytoplasmicMembrane	CD1842	CD630_18420
CDIF630erm_02048	CD630_18460	Putative conjugative transposon protein Tn1549-like, CTn5-Orf2	-2.90596		-0.286877		-3.50191		OFF		Cellular Processes	Stress Response and virulence	Prophages	CD1844	Unknown	CD1846	CD630_18460	Hfq; SigF; SigE; SigB
CDIF630erm_02049	CD630_18470	Putative conjugative transposon protein Tn1549-like, CTn5-Orf3							ON		Cellular Processes	Stress Response and virulence	Prophages	CD1844	Unknown	CD1847	CD630_18470
CDIF630erm_02063	CD630_18600	Putative conjugative transposon protein DUF1016 family, Tn1549-like, CTn5-Orf18	-1.12557		-0.803638				OFF		Cellular Processes	Stress Response and virulence	Prophages	Other	Cytoplasmic	CD1860	CD630_18600
CDIF630erm_02068	CD630_18650	Putative DNA recombination protein Tn1549-like,CTn5-Orf24	-0.515685		-2.10875		2.62522	*	1.77667	*	Cellular Processes	Stress Response and virulence	Prophages	CD1864	Cytoplasmic	CD1865	CD630_18650
CDIF630erm_02069	CD630_18660	putative conjugative transposon protein	-1.40008		-1.49858		1.92085		1.14864		Cellular Processes	Stress Response and virulence	Prophages	CD1864	Cytoplasmic	CD1866	CD630_18660
CDIF630erm_02070	CD630_18670	putative conjugative transposon protein			OFF				2.62066		Cellular Processes	Stress Response and virulence	Prophages	CD1864	Cytoplasmic	CD1867	CD630_18670
CDIF630erm_02071	CD630_18680	Putative conjugative transposon protein Tn1549-like, CTn5-Orf27			OFF		ON		0.883011		Cellular Processes	Stress Response and virulence	Prophages	CD1864	Cytoplasmic	CD1868	CD630_18680
CDIF630erm_02074	CD630_18710	Putative oxidoreductase Tn1549-like,CTn5-Orf30	0.570797		-0.13858		-0.985009		-1.33342		Cellular Processes	Stress Response and virulence	Prophages	Other	Unknown	CD1871	CD630_18710
CDIF630erm_02077	vexP2	ABC-type transport system, ATP-binding protein Tn1549-like, CTn5-Orf34 (EC 3.6.3.-)	-0.135559		-0.245455		0.682732		1.0585	*	Cellular Processes	Amino acid metabolism	Uptake of amino acids	CD1871	CytoplasmicMembrane	CD1874	CD630_18740
CDIF630erm_02078	vexP3	ABC-type transport system, permease Tn1549-like,CTn5-Orf35	-0.365646		-2.29059	*	-0.271863		-2.36323	*	Cellular Processes	Amino acid metabolism	Uptake of amino acids	CD1871	CytoplasmicMembrane	CD1875	CD630_18750
CDIF630erm_02079	vncR	Two-component response regulator Tn1549-like,CTn5-Orf36	-0.552331		-1.5917		1.41383		0.546921		Cellular Processes	Regulation and cell signaling	Uncharacterized two-component system	Other	Cytoplasmic	CD1876	CD630_18760
CDIF630erm_02085	CD630_18800	Uncharacterized protein			2.03294				OFF		Miscellaneous	Miscellaneous	Uncharacterized proteins	Other	Unknown	CD1880	CD630_18800
CDIF630erm_02086	CDIF630erm_02086	putative solute-binding protein	ON		ON						Miscellaneous	Miscellaneous	Uncharacterized proteins	Other	Unknown	CD1881	CD630_18810
CDIF630erm_02088	CD630_18830	Transcriptional regulator, AraC family	-0.366998		-0.156511		0.321162		1.21402		Cellular Processes	Regulation and cell signaling	Transcriptional regulators	AraC family transcriptional regulators	Cytoplasmic	CD1883	CD630_18830	SpoA
CDIF630erm_02096	CDIF630erm_02096	Uncharacterized protein, SsuA-like	ON		ON						Miscellaneous	Miscellaneous	Uncharacterized proteins	Other	Unknown	CD1891	CD630_18910
CDIF630erm_02097	CD630_18920	Putative methyltransferase, type 11 family	OFF		-3.66359		1.89639		1.01597		Cellular Processes	Cofactors	Menaquinone and ubiquinone	Other	Cytoplasmic	CD1892	CD630_18920
CDIF630erm_02098	proX	Putative oligonucleotide binding regulator	-0.618822		1.116		-0.859442		0.017706		Cellular process	Protein synthesis	tRNA metabolism	Other	Unknown	CD1893	CD630_18930	CodY; SpoA
CDIF630erm_02099	CD630_18940	Uncharacterized protein	OFF				OFF				Miscellaneous	Miscellaneous	Uncharacterized proteins	Other	Cytoplasmic	CD1894	CD630_18940
CDIF630erm_02100	CD630_18950	Putative membrane protein	-1.77095	*	-1.61536		-0.673128		-1.3198		Cell Envelope	Cell membrane	Cell membrane	Other	Unknown	CD1895	CD630_18950
CDIF630erm_02101	CD630_18960	Uncharacterized protein	OFF		OFF		2.60426		0.242675		Miscellaneous	Miscellaneous	Uncharacterized proteins	Other	CytoplasmicMembrane	CD1896	CD630_18960
CDIF630erm_02103	CD630_18980	Putative phage-related cell wall hydrolase (Endolysin)	0.504128		1.30149	*	-1.27551		-1.53879		Cellular Processes	Stress Response and virulence	Prophages	Other	Cellwall	CD1898	CD630_18980	Hfq; SigB
CDIF630erm_02108	CD630_19040	ABC-type transport system, permease			ON						Cellular Processes	Cofactors	Nitrogen and sulfur metabolism	Other	CytoplasmicMembrane	CD1904	CD630_19040	Hfq; SigF; SigE; SigK; SigB
CDIF630erm_02112	eutS	Ethanolamine carboxysome structural protein					ON		ON		Cellular Processes	Carbohydrate metabolism	Ethanolamine utilization	CD1908	CytoplasmicMembrane	CD1908	CD630_19080
CDIF630erm_02114	eutV	Two-component response regulator, Ethanolamine specific	-2.12182		-0.409255		-0.384157		0.539247		Cellular Processes	Carbohydrate metabolism	Ethanolamine utilization	CD1908	Cytoplasmic	CD1910	CD630_19100
CDIF630erm_02115	eutW	Two-component sensor histidine kinase,Ethanolamine specific			OFF		ON		0.541519		Cellular Processes	Carbohydrate metabolism	Ethanolamine utilization	CD1908	Cytoplasmic	CD1911	CD630_19110
CDIF630erm_02117	eutB	Ethanolamine ammonia lyase large subunit (EC 4.3.1.7)	3.02757		OFF		0.630215		OFF		Cellular Processes	Carbohydrate metabolism	Ethanolamine utilization	CD1912	Cytoplasmic	CD1913	CD630_19130
CDIF630erm_02118	eutC	Ethanolamine ammonia-lyase light chain (EC 4.3.1.7) (Ethanolamine ammonia-lyase small subunit)	OFF		OFF		OFF		OFF		Cellular Processes	Carbohydrate metabolism	Ethanolamine utilization	CD1912	Cytoplasmic	CD1914	CD630_19140
CDIF630erm_02119	eutL	Ethanolamine carboxysome structural protein	OFF		0.724507		-1.61609		-0.736042		Cellular Processes	Carbohydrate metabolism	Ethanolamine utilization	CD1912	Unknown	CD1915	CD630_19150
CDIF630erm_02121	eutE	Ethanolamine acetaldehyde oxydoreductase (EC 1.2.1.10)	OFF		OFF		OFF		OFF		Cellular Processes	Carbohydrate metabolism	Ethanolamine utilization	CD1912	Cytoplasmic	CD1917	CD630_19170
CDIF630erm_02122	eutK	Ethanolamine carboxysome strutural protein	-2.18772		0.0422454		OFF		OFF		Cellular Processes	Carbohydrate metabolism	Ethanolamine utilization	CD1912	Unknown	CD1918	CD630_19180
CDIF630erm_02129	eutQ	Ethanolamine utilization protein	OFF		OFF		OFF		OFF		Cellular Processes	Carbohydrate metabolism	Ethanolamine utilization	CD1912	Unknown	CD1925	CD630_19250
CDIF630erm_02131	CDIF630erm_02131	ABC-type transport system, ATP-binding protein	ON		ON						Miscellaneous	Miscellaneous	Uncharacterized proteins	Other	CytoplasmicMembrane	CD1927	CD630_19270
CDIF630erm_02132	CD630_19280	Putative membrane protein			ON						Cell Envelope	Cell membrane	Cell membrane	281199	CytoplasmicMembrane	CD1928	CD630_19280	SigH; SigF; SigE; SpoA; SigB
CDIF630erm_02133	CD630_19290	Putative membrane protein			2.53855				OFF		Cell Envelope	Cell membrane	Cell membrane	281199	CytoplasmicMembrane	CD1929	CD630_19290	SigF; SigE; SigB
CDIF630erm_02135	lexA	LexA repressor (EC 3.4.21.88)	-1.54211		-2.06205		1.25398		1.3256	*	Cellular Processes	DNA and RNA metabolism	DNA repair	Other	Cytoplasmic	CD1931	CD630_19310
CDIF630erm_02136	CD630_19320	Putative phage integrase	OFF		OFF	*	3.01025		1.6674		Cellular Processes	Stress Response and virulence	Prophages	Other	Cytoplasmic	CD1932	CD630_19320
CDIF630erm_02138	CD630_19340	Uncharacterized protein	-0.0900461		0.896864		-1.88786		OFF		Miscellaneous	Miscellaneous	Uncharacterized proteins	Other	Unknown	CD1934	CD630_19340	SigH
CDIF630erm_02139	spoVS	Stage V sporulation protein S	1.55019	*	3.69459	*	-0.480143		-0.948673		Cellular Processes	Sporulation and germination	Sporulation and germination	Other	Cytoplasmic	CD1935	CD630_19350	SigH
CDIF630erm_02140	accA	Acetyl-coenzyme A carboxylase carboxyl transferase subunit alpha (ACCase subunit alpha) (Acetyl-CoA carboxylase carboxyltransferase subunit alpha) (EC 2.1.3.15)	-0.882686		-1.48084		1.22899		0.863533		Cellular Processes	Fatty Acids	Fatty Acids	CD1936	Cytoplasmic	CD1936	CD630_19360
CDIF630erm_02141	accD	Acetyl-coenzyme A carboxylase carboxyl transferase subunit beta (ACCase subunit beta) (Acetyl-CoA carboxylase carboxyltransferase subunit beta) (EC 2.1.3.15)	-0.733201		-1.08252		1.05111		1.04654	*	Cellular Processes	Fatty Acids	Fatty Acids	CD1936	Cytoplasmic	CD1937	CD630_19370
CDIF630erm_02142	accC	Biotin carboxylase (EC 6.3.4.14) (EC 6.4.1.2)	-0.445234		-0.834642		1.6593	*	0.787549		Cellular Processes	Fatty Acids	Fatty Acids	CD1936	Cytoplasmic	CD1938	CD630_19380
CDIF630erm_02143	accB	Biotin carboxyl carrier protein of acetyl-CoA carboxylase	-0.267543		-0.338041		1.06848		0.228215		Cellular Processes	Fatty Acids	Fatty Acids	CD1936	Cytoplasmic	CD1939	CD630_19390
CDIF630erm_02146	CD630_19410	Uncharacterized protein	ON		ON						Miscellaneous	Miscellaneous	Uncharacterized proteins	Other	Unknown	CD1941	CD630_19410	SigH; SpoA
CDIF630erm_02147	trmB	tRNA (guanine-N(7)-)-methyltransferase (EC 2.1.1.33) (tRNA (guanine(46)-N(7))-methyltransferase) (tRNA(m7G46)-methyltransferase)	ON				ON				Cellular process	Protein synthesis	tRNA metabolism	Other	Cytoplasmic	CD1942	CD630_19420
CDIF630erm_02148	CD630_19430	FeS cluster biogenesis protein	-0.965993		-0.160858		-1.36742		-1.78073		Cellular Processes	Cofactors	Iron-sulfur cluster	Other	Unknown	CD1943	CD630_19430	Hfq; SigB
CDIF630erm_02150	CD630_19450	Putative glyoxalase	-1.32549		-0.168682		0.371415		1.56867		Cellular Processes	Stress Response and virulence	Detoxification	Other	Cytoplasmic	CD1945	CD630_19450
CDIF630erm_02155	CD630_19500	Putative membrane protein	OFF		OFF	*	-1.72677		-2.98718		Cell Envelope	Cell membrane	Cell membrane	Other	CytoplasmicMembrane	CD1950	CD630_19500
CDIF630erm_02158	CD630_19530	uncharacterized protein, coenzyme F420:L-glutamate ligase-like	0.00216672		0.687272		-0.413799		0.924069		Miscellaneous	Miscellaneous	Uncharacterized proteins	Other	Unknown	CD1953	CD630_19530
CDIF630erm_02163	CD630_19580	Putative 4Fe-4S binding protein putative ferredoxin putative dehydrogenase putative reductase									Cellular Processes	Central energy metabolism	Electron transport	Other	CytoplasmicMembrane	CD1958	CD630_19580	SigB
CDIF630erm_02166	CD630_19610	ABC-type transport system, ATP-binding protein (EC 3.6.3.-)	0.900333		1.60545		0.607791		1.07935		Cellular Processes	Amino acid metabolism	Uptake of amino acids	Other	CytoplasmicMembrane	CD1961	CD630_19610
CDIF630erm_02168	CD630_19630	Putative methyltransferase (EC 2.1.1.-)			-1.95126	*	2.33045		1.23264		Miscellaneous	Miscellaneous	Uncharacterized proteins	281206	Cytoplasmic	CD1963	CD630_19630
CDIF630erm_02169	CD630_19640	Putative transcriptional regulator	-0.105077		0.227609		2.3096		0.52933		Miscellaneous	Miscellaneous	Uncharacterized proteins	281206	Unknown	CD1964	CD630_19640
CDIF630erm_02171	baat	putative bile acid-CoA:amino acid N-acyltransferase					ON		ON		Cellular Processes	Fatty Acids	Degradation of fatty acids	Other	Cytoplasmic	CD1966	CD630_19660	SigB
CDIF630erm_02172	CD630_19670	Uncharacterized protein	-0.398823		0.73844		1.74872		1.96679		Miscellaneous	Miscellaneous	Uncharacterized proteins	CD1967	Cytoplasmic	CD1967	CD630_19670	SigH; CodY; SpoA
CDIF630erm_02174	CD630_19690	Putative oligonucleotide binding regulator	-1.36904		-2.26037		2.10257	*	0.526074		Miscellaneous	Miscellaneous	Uncharacterized proteins	CD1967	Unknown	CD1969	CD630_19690
CDIF630erm_02175	CD630_19700	Putative enzyme, cyclase family	-0.322207		0.345969		-0.782773		-1.08347		Miscellaneous	Miscellaneous	Uncharacterized proteins	CD1967	Cytoplasmic	CD1970	CD630_19700	SigB
CDIF630erm_02177	CD630_19720	Putative peptidase, M20A family	-0.174457		0.0726118		-1.57504		-2.49245		Cellular Processes	Stress Response and virulence	Universal stress response	CD1972	Cytoplasmic	CD1972	CD630_19720	SigB
CDIF630erm_02178	CD630_19730	Aluminum resistance protein	0.840353		-1.09749		-1.18896		1.30721		Cellular Processes	Stress Response and virulence	Detoxification	Other	Cytoplasmic	CD1973	CD630_19730
CDIF630erm_02179	hfq	RNA-binding protein Hfq	0.0363674		2.07339	*	-0.605681		-3.1581		Cellular Processes	Stress Response and virulence	Universal stress response	CD1972	Cytoplasmic	CD1974	CD630_19740
CDIF630erm_02180	miaA	tRNA dimethylallyltransferase (EC 2.5.1.75) (Dimethylallyl diphosphate:tRNA dimethylallyltransferase) (DMAPP:tRNA dimethylallyltransferase) (DMATase) (Isopentenyl-diphosphate:tRNA isopentenyltransferase) (IPP transferase) (IPPT) (IPTase)	-1.17441		-1.16692		-1.32001		1.02835		Cellular process	Protein synthesis	tRNA metabolism	Other	Cytoplasmic	CD1975	CD630_19750
CDIF630erm_02181	mutL	DNA mismatch repair protein MutL	-0.844528		-1.89175		1.29843		1.4738	*	Cellular Processes	DNA and RNA metabolism	DNA repair	CD1972	Cytoplasmic	CD1976	CD630_19760
CDIF630erm_02182	mutS	DNA mismatch repair protein MutS	-0.192567		-1.14902		1.577	*	2.204	*	Cellular Processes	DNA and RNA metabolism	DNA repair	CD1972	CytoplasmicMembrane	CD1977	CD630_19770
CDIF630erm_02183	CD630_19780	ABC-type transport system, ATP-binding protein (EC 3.6.3.-)			OFF						Cellular Processes	Cofactors	Thiamin	CD1978	CytoplasmicMembrane	CD1978	CD630_19780
CDIF630erm_02184	CD630_19790	ABC-type transport system, extracellular solute-binding protein	-0.662187		-2.05112	*	0.721691		-1.2443	*	Cellular Processes	Cofactors	Thiamin	CD1978	Unknown	CD1979	CD630_19790
CDIF630erm_02186	CD630_19801	putative thiamine binding protein			OFF				OFF		Miscellaneous	Miscellaneous	Uncharacterized proteins	Other	Cytoplasmic	CD1980A	CD630_19801
CDIF630erm_02193	CD630_19840	Putative hydrolase, NUDIX family	-0.0446882		-2.06486		-0.320648		-2.14778		Cellular Processes	DNA and RNA metabolism	DNA metabolism	Other	Unknown	CD1984	CD630_19840
CDIF630erm_02195	miaB	tRNA-2-methylthio-N(6)-dimethylallyladenosine synthase (EC 2.8.4.3) ((Dimethylallyl)adenosine tRNA methylthiotransferase MiaB) (tRNA-i(6)A37 methylthiotransferase)	-1.14116		-3.12559	*	2.18161	*	0.945983	*	Cellular process	Protein synthesis	tRNA metabolism	Other	Cytoplasmic	CD1986	CD630_19860
CDIF630erm_02209	CD630_19930	Putative decarboxylase	0.738835		1.57943		-1.08253		-3.44308		Miscellaneous	Miscellaneous	Uncharacterized proteins	Other	Unknown	CD1993	CD630_19930	Fur; SpoA
CDIF630erm_02214	CD630_19960	Transcriptional regulator, AraC family			-1.42628		2.33195	*	1.95139		Cellular Processes	Regulation and cell signaling	Transcriptional regulators	Other	Cytoplasmic	CD1996	CD630_19960	SpoA
CDIF630erm_02215	CD630_19970	Putative proline iminopeptidase (PIP), S33 family (EC 3.4.11.5)					ON		ON		Cellular Processes	Amino acid metabolism	Amino acid metabolism	Other	Cytoplasmic	CD1997	CD630_19970
CDIF630erm_02222	effR	Transcriptional regulator, MarR family			ON						Cellular Processes	Regulation and cell signaling	Transcriptional regulators	MarR family transcriptional regulators	Cytoplasmic	CD2004	CD630_20040	Hfq
CDIF630erm_02231	hydD	Putative hydrolase			OFF		ON		-0.280898		Cellular Processes	Stress Response and virulence	Detoxification	281215	Cytoplasmic	CD2012	CD630_20120
CDIF630erm_02232	hydR	Transcriptional regulator, TetR family									Cellular Processes	Stress Response and virulence	Detoxification	281215	Cytoplasmic	CD2013	CD630_20130
CDIF630erm_02233	ilvD	Dihydroxy-acid dehydratase (DAD) (EC 4.2.1.9)	0.614145		-1.02727		1.86425		1.38557	*	Cellular Processes	Amino acid metabolism	Amino acid metabolism	Other	Cytoplasmic	CD2014	CD630_20140	CodY
CDIF630erm_02237	CD630_20170	Transcriptional regulator, HTH-type	-0.283428		ON		-0.780668				Cellular Processes	Regulation and cell signaling	Transcriptional regulators	HTH-type transcriptional regulators	Cytoplasmic	CD2017	CD630_20170
CDIF630erm_02241	clpB	Chaperone protein ClpB	0.586725		0.257351		-1.44336		-0.827835		Cellular Processes	Stress Response and virulence	Universal stress response	Other	Cytoplasmic	CD2020	CD630_20200
CDIF630erm_02242	CD630_20210	Uncharacterized protein	-0.178602		-0.743688		2.04475		1.81487	*	Miscellaneous	Miscellaneous	Uncharacterized proteins	Other	Cytoplasmic	CD2021	CD630_20210	ccpA
CDIF630erm_02244	CD630_20230	Transcriptional regulator, GntR family	OFF		OFF		2.17977		1.58035		Cellular Processes	Regulation and cell signaling	Transcriptional regulators	GntR family transcriptional regulators	Cytoplasmic	CD2023	CD630_20230
CDIF630erm_02245	CD630_20240	ABC-type transport system, multidrug-family ATP-binding protein (EC 3.6.3.-)			-1.22934		1.02701	*	1.78751		Cellular Processes	Stress Response and virulence	Multi-drug transport	Other	CytoplasmicMembrane	CD2024	CD630_20240	ccpA
CDIF630erm_02248	CD630_20270	N-carbamoyl-L-amino acid hydrolase (EC 3.5.1.87)	2.30572	*	1.95067	*	0.473328		0.855624		Cellular process	Protein folding and degradation	Peptidases	Other	Cytoplasmic	CD2027	CD630_20270	ccpA
CDIF630erm_02249	racX	Putative aspartate racemase RacX (EC 5.1.1.13)	-0.484181		0.14653		1.50304	*	0.177295		Cellular Processes	Amino acid metabolism	Glutamine, glutamate, aspartate and asparagine metabolism	Glutamine, glutamate, aspartate and asparagine metabolism	Unknown	CD2028	CD630_20280
CDIF630erm_02250	CD630_20290	Putative lipoprotein	-0.5891		-0.373704		-0.65407		-1.12435	*	Cell Envelope	Cell membrane	Lipoproteins	Lipoproteins	Unknown	CD2029	CD630_20290
CDIF630erm_02268	CD630_20460	Uncharacterized protein	ON		0.6421		ON		1.13062		Miscellaneous	Miscellaneous	Uncharacterized proteins	Other	Cytoplasmic	CD2046	CD630_20460	c-di-GMP
CDIF630erm_02270	CD630_20480	Transcriptional regulator, RpiR family	-0.62187		-0.394751		0.920849		0.871607		Cellular Processes	Regulation and cell signaling	Transcriptional regulators	RpiR family transcriptional regulators	CytoplasmicMembrane	CD2048	CD630_20480
CDIF630erm_02271	CD630_20490	Putative rRNA methylase							1.52859		Cellular process	Protein synthesis	Ribosome biogenesis	281221	Cytoplasmic	CD2049	CD630_20490
CDIF630erm_02272	rluB	ribosomal large subunit pseudouridine synthase B	-0.549226				-1.71205				Cellular process	Protein synthesis	Ribosome biogenesis	281221	Cytoplasmic	CD2050	CD630_20500
CDIF630erm_02274	CD630_20520	Putative lipoprotein	-2.06361		0.316019		-1.88921		1.55627		Cell Envelope	Cell membrane	Lipoproteins	Lipoproteins	Unknown	CD2052	CD630_20520	SpoA
CDIF630erm_02275	lysA	Diaminopimelate decarboxylase (DAP decarboxylase) (DAPDC) (EC 4.1.1.20)	-0.29136		-1.01428		1.58006	*	2.19554	*	Cellular Processes	Amino acid metabolism	Amino acid metabolism	CD2053	Cytoplasmic	CD2053	CD630_20530
CDIF630erm_02276	lysC	Aspartokinase (EC 2.7.2.4)	-0.503918		0.371351		-0.280107		0.153457		Cellular Processes	Amino acid metabolism	Amino acid metabolism	CD2053	Cytoplasmic	CD2054	CD630_20540
CDIF630erm_02279	CD630_20560	Putative membrane protein	-2.06881	*	-3.43342	*	0.400071		-0.427644	*	Cell Envelope	Cell membrane	Cell membrane	Other	CytoplasmicMembrane	CD2056	CD630_20560	ccpA
CDIF630erm_02281	CD630_20580	Uncharacterized protein	-1.70484		-2.76542	*	0.602936		-2.19769	*	Miscellaneous	Miscellaneous	Uncharacterized proteins	Other	Unknown	CD2058	CD630_20580
CDIF630erm_02282	glnS	Glutamine--tRNA ligase (EC 6.1.1.18) (Glutaminyl-tRNA synthetase) (GlnRS)	-0.708461		-0.146637		0.162076		1.47289	*	Cellular process	Protein synthesis	tRNA metabolism	Other	Cytoplasmic	CD2059	CD630_20590
CDIF630erm_02283	dagK	diacylglycerol kinase	ON		ON						Cellular Processes	Fatty Acids	Fatty Acids	281223	Unknown	CD2060	CD630_20600	ccpA
CDIF630erm_02284	CD630_20610	LUD domain protein	-0.124364		0.52056		-2.36382	*	-3.83547		Cellular Processes	Fatty Acids	Fatty Acids	281223	Cytoplasmic	CD2061	CD630_20610	ccpA
CDIF630erm_02285	CD630_20620	Uncharacterized protein	-1.81496		-3.39904	*	0.642618		-0.731736		Miscellaneous	Miscellaneous	Uncharacterized proteins	Other	CytoplasmicMembrane	CD2062	CD630_20620
CDIF630erm_02287	CD630_20640	Uncharacterized protein									Miscellaneous	Miscellaneous	Uncharacterized proteins	Other	Unknown	CD2064	CD630_20640
CDIF630erm_02288	CD630_20650	Transcriptional regulator, beta-lactams repressor	-0.482509		OFF		1.27085		0.679464		Cellular Processes	Regulation and cell signaling	Transcriptional regulators	Beta-lactams repressors	Unknown	CD2065	CD630_20650
CDIF630erm_02291	CD630_20680	ABC-type transport system, ATP-binding protein (EC 3.6.3.-)	-0.297356		-0.611618		-0.877963		1.07349		Miscellaneous	Miscellaneous	Uncharacterized proteins	Other	Cytoplasmic	CD2068	CD630_20680
CDIF630erm_02292	CD630_20690	putative molybdopterin cofactor biosynthesis protein	-1.65384		-1.75226		0.125007		0.420863		Cellular Processes	Cofactors	Molybdopterin	Other	Cytoplasmic	CD2069	CD630_20690	ccpA
CDIF630erm_02299	CD630_20760	Uncharacterized protein	-1.87644		-3.48492		-2.21641		OFF		Miscellaneous	Miscellaneous	Uncharacterized proteins	Other	Cytoplasmic	CD2076	CD630_20760
CDIF630erm_02307	ylmB	putative N-formyl-4-amino-5-aminomethyl-2-methylpyrimidine deformylase	OFF				OFF				Cellular process	Protein folding and degradation	Peptidases	Other	Cytoplasmic	CD2084	CD630_20840	SigF; SigE
CDIF630erm_02309	CD630_20860	putative iron-sulfur flavoprotein					ON		ON		Cellular Processes	DNA and RNA metabolism	Nucleosides and nucleotide metabolism	CD2086	Cytoplasmic	CD2086	CD630_20860	SigB
CDIF630erm_02310	xdhA3	xanthine dehydrogenase, molybdenum binding subunit							ON		Cellular Processes	DNA and RNA metabolism	Nucleosides and nucleotide metabolism	CD2086	CytoplasmicMembrane	CD2087	CD630_20870
CDIF630erm_02315	CD630_20920	Transcriptional regulator, sigma-54-dependent	-1.79227		-2.5676		2.33095	*	0.873103		Cellular Processes	Stress Response and virulence	RpoN dependent stress reponse	Other	Cytoplasmic	CD2092	CD630_20920	RpoN (EBP)
CDIF630erm_02317	CD630_20940	Putative restriction enzyme	OFF		-0.46525		-0.902893	*	2.39321		Cellular Processes	Cell division and cell death	Cell division	CD2093	Cytoplasmic	CD2094	CD630_20940
CDIF630erm_02318	CD630_20950	Putative cell division GTPase	-1.91853	*	-0.289287		-0.150135		0.635927		Cellular Processes	Cell division and cell death	Cell division	CD2093	Cytoplasmic	CD2095	CD630_20950
CDIF630erm_02322	XdhA4	xanthine dehydrogenase, molybdenum binding subunit	0.878162		-0.543199		1.00979		0.526524		Cellular Processes	DNA and RNA metabolism	Nucleosides and nucleotide metabolism	CD2099	CytoplasmicMembrane	CD2099	CD630_20990
CDIF630erm_02323	XdhC3	xanthine dehydrogenase, iron-sulfur binding subunit	-1.10868		-1.01745		-0.948549		1.37866		Cellular Processes	DNA and RNA metabolism	Nucleosides and nucleotide metabolism	CD2099	Cytoplasmic	CD2100	CD630_21000
CDIF630erm_02324	xdhB3	xanthine dehydrogenase, FAD-binding subunit	-1.23588		-2.35862		0.232817		0.815043		Cellular Processes	DNA and RNA metabolism	Nucleosides and nucleotide metabolism	CD2099	Cytoplasmic	CD2101	CD630_21010
CDIF630erm_02330	CD630_21060	Putative ATP-dependent RNA helicase	-2.39832		-1.54925		0.113479		0.856403		Cellular Processes	DNA and RNA metabolism	RNA Processing	Other	Cytoplasmic	CD2106	CD630_21060
CDIF630erm_02331	pbuG	adenine / guanine / hypoxanthine permease	-1.75045		-3.77379	*	0.41924		-1.63278	*	Cellular Processes	DNA and RNA metabolism	Nucleosides and nucleotide metabolism	Other	CytoplasmicMembrane	CD2107	CD630_21070	ccpA; CodY
CDIF630erm_02335	tal1	Transaldolase (EC 2.2.1.2)	-1.92777	*	-0.735553		-2.48173	*	-1.60911		Cellular Processes	Central energy metabolism	Pentose phosphate pathway	Other	Cytoplasmic	CD2110	CD630_21100	SigB
CDIF630erm_02336	CD630_21110	Transcriptional regulator, DeoR family	-0.685411		-1.08406		1.83726	*	1.26303	*	Cellular Processes	Regulation and cell signaling	Transcriptional regulators	DeoR family transcriptional regulators	Cytoplasmic	CD2111	CD630_21110	SigH
CDIF630erm_02338	CD630_21130	Two-component sensor histidine kinase	OFF		OFF		1.48075		1.08852		Cellular Processes	Regulation and cell signaling	Uncharacterized two-component system	281232	Cytoplasmic	CD2113	CD630_21130
CDIF630erm_02339	CD630_21140	Two-component response regulator	-0.401997		-2.036		0.989363		0.806237		Cellular Processes	Regulation and cell signaling	Uncharacterized two-component system	281232	Cytoplasmic	CD2114	CD630_21140	ccpA
CDIF630erm_02340	CD630_21150	Putative copper-transporting P-type ATPase (EC 3.6.3.4)	-2.35164		-3.40424		-0.571289		-0.255067		Cellular Processes	Cofactors	Cation transporters	Other	CytoplasmicMembrane	CD2115	CD630_21150	ccpA
CDIF630erm_02343	bipA	GTP-binding protein BipA	-1.28682		-2.05405	*	0.943664		1.37308	*	Cellular process	Protein synthesis	Ribosome biogenesis	Other	CytoplasmicMembrane	CD2116	CD630_21160
CDIF630erm_02344	trxB2	Thioredoxin reductase (EC 1.8.1.9)	0.186574		-0.341273		2.65476		2.04683		Cellular Processes	Stress Response and virulence	Oxidative stress	Other	Cytoplasmic	CD2117	CD630_21170	c-di-GMP
CDIF630erm_02347	thrC	Threonine synthase (EC 4.2.3.1)	-1.65153		-2.74095	*	-0.521171		0.180289		Cellular Processes	Amino acid metabolism	Amino acid metabolism	281233	Cytoplasmic	CD2118	CD630_21180	ccpA
CDIF630erm_02348	thrB	Homoserine kinase (HK) (HSK) (EC 2.7.1.39)	-1.19636		-1.06498		1.86049	*	1.42257	*	Cellular Processes	Amino acid metabolism	Amino acid metabolism	281233	Cytoplasmic	CD2119	CD630_21190	SigH
CDIF630erm_02349	CD630_21200	Putative 2-nitropropane dioxygenase	-0.116376		-0.87709		1.79867	*	1.11583	*	Cellular Processes	Cofactors	Nitrogen and sulfur metabolism	Other	Cytoplasmic	CD2120	CD630_21200
CDIF630erm_02350	CD630_21210	uncharacterized protein, FMN-binding			ON						Miscellaneous	Miscellaneous	Uncharacterized proteins	Other	Unknown	CD2121	CD630_21210	SigH; Hfq; SigF; SigE; Fur; SigB
CDIF630erm_02351	corA	magnesium transport protein CorA			OFF		ON		-1.05407		Cellular Processes	Cofactors	Cation transporters	Other	CytoplasmicMembrane	CD2122	CD630_21220
CDIF630erm_02352	CD630_21230	Putative multiprotein-complex assembly TPR repeat-containing protein	-0.961724		-3.50082		0.363135		-1.24716		Cellular Processes	Stress Response and virulence	Detoxification	Other	Cytoplasmic	CD2123	CD630_21230
CDIF630erm_02355	CD630_21250	Putative acetyltransferase	0.498588		1.34586	*	-0.564357		0.726675		Cellular process	Protein synthesis	tRNA metabolism	Other	Cytoplasmic	CD2125	CD630_21250	SigB
CDIF630erm_02357	CD630_21260	Putative membrane protein			OFF				OFF		Cell Envelope	Cell membrane	Cell membrane	Other	CytoplasmicMembrane	CD2126	CD630_21260
CDIF630erm_02358	CD630_21270	Putative exported protein	2.56	*	1.90748	*	OFF		OFF		Miscellaneous	Miscellaneous	Uncharacterized proteins	Other	CytoplasmicMembrane	CD2127	CD630_21270
CDIF630erm_02359	ispG	4-hydroxy-3-methylbut-2-en-1-yl diphosphate synthase (flavodoxin) (EC 1.17.7.3) (1-hydroxy-2-methyl-2-(E)-butenyl 4-diphosphate synthase)	-0.540633		-1.77469		2.62852	*	1.30425	*	Cellular Processes	Fatty Acids	Isoprenoid metabolism	CD2128	Cytoplasmic	CD2128	CD630_21280
CDIF630erm_02360	CD630_21290	putative membrane-associated peptidase, M50 family	OFF		OFF		-0.162257		OFF		Cellular Processes	Fatty Acids	Fatty Acids	CD2128	CytoplasmicMembrane	CD2129	CD630_21290	ccpA
CDIF630erm_02361	dxr	1-deoxy-D-xylulose 5-phosphate reductoisomerase (DXP reductoisomerase) (EC 1.1.1.267) (1-deoxyxylulose-5-phosphate reductoisomerase) (2-C-methyl-D-erythritol 4-phosphate synthase)	-0.588626		-0.344967		1.07476		1.21517		Cellular Processes	Fatty Acids	Isoprenoid metabolism	CD2128	Cytoplasmic	CD2130	CD630_21300
CDIF630erm_02363	CD630_21330	Uncharacterized protein	0.116987		0.0913795		2.28945		0.702111		Miscellaneous	Miscellaneous	Uncharacterized proteins	Other	Unknown	CD2133	CD630_21330
CDIF630erm_02366	uppS	undecaprenyl pyrophosphate synthetase	0.0924698		-0.45085		0.575742		0.578385		Cell Envelope	Cell wall	Cell wall biosynthesis	Other	Cytoplasmic	CD2136	CD630_21360
CDIF630erm_02368	rrf	Ribosome-recycling factor (RRF) (Ribosome-releasing factor)	-0.159158		0.83008		-2.0349	*	-3.03475		Cellular process	Protein synthesis	Translation	CD2135	Cytoplasmic	CD2137	CD630_21370	SigH
CDIF630erm_02369	pyrH	Uridylate kinase (UK) (EC 2.7.4.22) (Uridine monophosphate kinase) (UMP kinase) (UMPK)	0.143313		-1.24462		0.277115		-0.588119		Cellular Processes	DNA and RNA metabolism	Nucleosides and nucleotide metabolism	Other	Cytoplasmic	CD2138	CD630_21380
CDIF630erm_02370	tsf	Elongation factor Ts (EF-Ts)	-0.402173		-0.106188		-1.69646		-1.45064		Cellular process	Protein synthesis	Translation	CD2135	Cytoplasmic	CD2139	CD630_21390	SigH
CDIF630erm_02371	rpsB	30S ribosomal protein S2	-0.586382		-0.678702		0.738904		0.637115		Cellular process	Protein synthesis	Ribosome biogenesis	CD2135	Cytoplasmic	CD2140	CD630_21400	SigH
CDIF630erm_02376	CD630_21450	DNA mismatch repair protein, MutS2-like					ON				Cellular Processes	DNA and RNA metabolism	DNA repair	Other	Cytoplasmic	CD2145	CD630_21450
CDIF630erm_02383	CD630_21520	deblocking aminopeptidase	-0.857786		0.33823		-2.27446		-2.11175		Cellular process	Protein folding and degradation	Peptidases	Other	Cytoplasmic	CD2152	CD630_21520
CDIF630erm_02384	CD630_21530	[FeFe]-hydrogenase system regulator	1.64862		2.10887	*	0.762333		0.879949		Miscellaneous	Miscellaneous	Uncharacterized proteins	Other	Cytoplasmic	CD2153	CD630_21530
CDIF630erm_02385	CD630_21540	Putative ATP/GTP-binding protein	-0.562516		-1.03534		2.02592	*	1.11684	*	Cellular process	Protein folding and degradation	Protein folding and degradation	Other	Cytoplasmic	CD2154	CD630_21540
CDIF630erm_02386	bioB1	Biotin synthase (EC 2.8.1.6)	-1.14747		-1.42314		1.70246	*	0.835208		Cellular Processes	Cofactors	Biotin	CD2153	Cytoplasmic	CD2155	CD630_21550
CDIF630erm_02387	thiH	2-iminoacetate synthase	0.10859		-1.96634		2.51699	*	0.93765		Cellular Processes	Cofactors	Biotin	CD2153	Cytoplasmic	CD2156	CD630_21560	SpoA
CDIF630erm_02389	gabT	isoleucine 2-epimerase	1.03376		-0.119604		1.9885	*	1.13926	*	Cellular Processes	Amino acid metabolism	Glutamine, glutamate, aspartate and asparagine metabolism	Glutamine, glutamate, aspartate and asparagine metabolism	Cytoplasmic	CD2158	CD630_21580	CodY; SpoA; c-di-GMP
CDIF630erm_02393	CD630_21620	Putative GCN5-related N-acetyltransferase-like protein	-2.01902		-2.43141		0.341489		0.469301		Miscellaneous	Miscellaneous	Uncharacterized proteins	281237	Cytoplasmic	CD2162	CD630_21620
CDIF630erm_02394	CD630_21630	putative threonyl / alanyl-tRNA synthetase	-0.343137		-1.18002		-0.658635		0.0785401		Miscellaneous	Miscellaneous	Uncharacterized proteins	281237	Cytoplasmic	CD2163	CD630_21630
CDIF630erm_02396	ldh	L-lactate dehydrogenase (L-LDH) (EC 1.1.1.27)	-0.29273		0.299076		-0.337039		0.0531701		Cellular Processes	Central energy metabolism	Fermentation	Other	Cytoplasmic	CD2164	CD630_21640	CodY
CDIF630erm_02397	CD630_21650	Transcriptional regulator, HTH-type	OFF								Cellular Processes	Regulation and cell signaling	Transcriptional regulators	HTH-type transcriptional regulators	Unknown	CD2165	CD630_21650
CDIF630erm_02398	msrAB	Multifunctional fusion protein [Includes: Peptide methionine sulfoxide reductase MsrA (Protein-methionine-S-oxide reductase) (EC 1.8.4.11) (Peptide-methionine (S)-S-oxide reductase) (Peptide Met(O) reductase); Peptide methionine sulfoxide reductase MsrB (EC 1.8.4.12) (Peptide-methionine (R)-S-oxide reductase)]	-0.0767768		0.782225		-1.07899		0.711297		Cellular Processes	Stress Response and virulence	Oxidative stress	Other	Unknown	CD2166	CD630_21660	ccpA
CDIF630erm_02400	hcp	Hydroxylamine reductase (EC 1.7.99.1) (Hybrid-cluster protein) (HCP) (Prismane protein)	4.21728		4.62556	*	0.52484		0.0449268		Cellular Processes	Cofactors	Nitrogen and sulfur metabolism	281238	Cytoplasmic	CD2168	CD630_21680	SigH; Fur
CDIF630erm_02401	CD630_21690	Putative iron-sulfur binding protein	3.14621		5.10568		OFF				Cellular Processes	Cofactors	Nitrogen and sulfur metabolism	281238	Unknown	CD2169	CD630_21690	Fur
CDIF630erm_02402	CDIF630erm_02402	putative regulatory protein					ON				Cellular Processes	Regulation and cell signaling	Transcriptional regulators	Other	Cytoplasmic	CD2170	CD630_21700
CDIF630erm_02404	CD630_21720	ABC-type transport system,cystine/aminoacid-family ATP-binding protein (EC 3.6.3.-)	0.156521		-1.7485		2.71838	*	1.06698	*	Cellular Processes	Amino acid metabolism	Uptake of amino acids	CD2172	CytoplasmicMembrane	CD2172	CD630_21720	SigH; ccpA
CDIF630erm_02405	CD630_21730	Putative peptidase, M20D family (EC 3.5.1.-)	-1.79363		-1.21599		2.48134	*	2.03103	*	Cellular Processes	Amino acid metabolism	Amino acid metabolism	CD2172	Cytoplasmic	CD2173	CD630_21730	SigH; ccpA
CDIF630erm_02406	CD630_21740	ABC-type transport system,cystine/aminoacid-family extracellular solute-binding protein	-0.0925782		-0.940939		0.480505		-0.860779		Cellular Processes	Amino acid metabolism	Uptake of amino acids	CD2172	Unknown	CD2174	CD630_21740	SigH; ccpA; Hfq; SpoA; SigB
CDIF630erm_02407	CD630_21750	ABC-type transport system,cystine/aminoacid-family permease	-2.15535		-1.99478		-0.343387		-0.426835		Cellular Processes	Amino acid metabolism	Uptake of amino acids	CD2172	CytoplasmicMembrane	CD2175	CD630_21750	SigH; ccpA; SpoA
CDIF630erm_02409	CD630_21770	ABC-type transport system,cystine/aminoacid-family extracellular solute-binding protein	0.0291923		-0.808111		0.292203		-0.662272		Cellular Processes	Amino acid metabolism	Uptake of amino acids	CD2172	Unknown	CD2177	CD630_21770	SigH; ccpA; SpoA; SigB
CDIF630erm_02411	CD630_21790	putative molybdopterin oxidoreductase	0.057298		-0.497289		0.177122		1.32998	*	Cellular Processes	Cofactors	Sulfur Metabolism	Other	Cytoplasmic	CD2179	CD630_21790	ccpA; SigB
CDIF630erm_02413	CD630_21810	Putative alpha/beta hydrolase	-0.312941		-0.118343		1.46643	*	1.07102		Cellular Processes	Stress Response and virulence	Detoxification	Other	Cytoplasmic	CD2181	CD630_21810	SpoA
CDIF630erm_02415	dbpA	ATP-dependent RNA helicase			-0.478219		ON		0.844797		Cellular Processes	DNA and RNA metabolism	RNA Processing	Other	Cytoplasmic	CD2183	CD630_21830
CDIF630erm_02416	CDIF630erm_02416	putative phage-related cell wall hydrolase (endolysin)	ON		ON						Cellular Processes	Stress Response and virulence	Prophages	Other	Cytoplasmic	CD2184	CD630_21840
CDIF630erm_02419	CD630_21870	Putative phage-related cell wall hydrolase	OFF	*	-2.69945		-0.695034	*	-1.76024		Cellular Processes	Stress Response and virulence	Prophages	Other	Extracellular	CD2187	CD630_21870
CDIF630erm_02420	mapA	Maltose phosphorylase/glycosyl hydrolase/vacuolar acid trehalase (EC 2.4.1.8)	OFF		OFF		-0.439498		2.10184		Cellular Processes	Carbohydrate metabolism	Maltose	281244	Cytoplasmic	CD2188	CD630_21880
CDIF630erm_02421	pgmB	Beta-phosphoglucomutase (Beta-D-Glucose 1,6-phosphomutase) (EC 5.4.2.6)			OFF				1.22351		Cellular Processes	Carbohydrate metabolism	Maltose	281244	Cytoplasmic	CD2189	CD630_21890
CDIF630erm_02422	CD630_21900	Cyclomaltodextrinase (Maltogenic alpha-amylase) (Cyclomaltodextrin dextrin-hydrolase (Decyclizing)) (EC 3.2.1.54)	-0.973779		-0.173556		-2.37739		0.887459		Cellular Processes	Carbohydrate metabolism	Carbohydrate utilization	Other	Cytoplasmic	CD2190	CD630_21900
CDIF630erm_02425	CDIF630erm_02425	cell wall hydrolase	-0.2386		ON		OFF				Cell Envelope	Cell wall	Cell wall biosynthesis	Other	Cellwall	CD2193	CD630_21930
CDIF630erm_02426	CD630_21940	Putative ROK protein									Miscellaneous	Miscellaneous	Uncharacterized proteins	Other	Cytoplasmic	CD2194	CD630_21940
CDIF630erm_02427	ftnA	bacterial non-heme ferritin	-1.60424		-0.183854		-1.56565		-1.5492		Cellular Processes	Central energy metabolism	Electron transport	Other	Cytoplasmic	CD2195	CD630_21950	Hfq; SpoA
CDIF630erm_02436	CD630_22030	Transcriptional regulator, TetR family			OFF		0.14862		1.21248		Cellular Processes	Regulation and cell signaling	Transcriptional regulators	TetR family	Cytoplasmic	CD2203	CD630_22030
CDIF630erm_02437	CD630_22040	Putative esterase	-0.0031531		-0.752503		1.79859	*	1.3288	*	Cellular Processes	Fatty Acids	Degradation of fatty acids	CD2204	Extracellular	CD2204	CD630_22040
CDIF630erm_02438	CD630_22050	Putative membrane protein	OFF		OFF		OFF		-2.17497		Cellular Processes	Fatty Acids	Fatty Acids	CD2204	CytoplasmicMembrane	CD2205	CD630_22050
CDIF630erm_02439	aldH	Aldehyde dehydrogenase			OFF		ON		-1.20301		Cellular Processes	Fatty Acids	Phospholipid metabolism	CD2204	Cytoplasmic	CD2206	CD630_22060	Fur
CDIF630erm_02440	CD630_22070	flavodoxin					ON				Cellular Processes	Central energy metabolism	Electron transport	Other	Unknown	CD2207	CD630_22070
CDIF630erm_02442	hflX	GTPase HflX (GTP-binding protein HflX)			OFF		ON		-0.141258		Cellular process	Protein synthesis	Ribosome rescue	Other	Cytoplasmic	CD2209	CD630_22090	SigH; Hfq; c-di-GMP
CDIF630erm_02443	CD630_22100	ABC-type transport system, multidrug-family ATP-binding/permease (EC 3.6.3.-)	-2.11703		-3.99463	*	0.653311		-0.156819		Cellular Processes	Stress Response and virulence	Multi-drug transport	CD2210	CytoplasmicMembrane	CD2210	CD630_22100
CDIF630erm_02444	CD630_22110	ABC-type transport system, multidrug-family ATP-binding/permease (EC 3.6.3.-)	-1.17346		-2.92851	*	0.48724		0.0402788		Cellular Processes	Stress Response and virulence	Multi-drug transport	CD2210	CytoplasmicMembrane	CD2211	CD630_22110
CDIF630erm_02445	CD630_22120	Transcriptional regulator, MarR family					ON				Cellular Processes	Regulation and cell signaling	Transcriptional regulators	MarR family transcriptional regulators	Cytoplasmic	CD2212	CD630_22120
CDIF630erm_02446	cynT	Carbonic anhydrase (EC 4.2.1.1)	-1.12236		-1.32992		2.33056	*	1.18187		Cellular Processes	CO2 fixation	Tetrahydrofolate interconversion	Other	Cytoplasmic	CD2213	CD630_22130
CDIF630erm_02449	CD630_22160	Uncharacterized protein	0.642512		-0.255696		1.91224	*	1.65428		Miscellaneous	Miscellaneous	Uncharacterized proteins	Other	Cytoplasmic	CD2216	CD630_22160	SigH; Fur; SpoA
CDIF630erm_02450	aroD	3-dehydroquinate dehydratase (3-dehydroquinase) (EC 4.2.1.10) (Type I DHQase) (Type I dehydroquinase) (DHQ1)	-0.306015		-0.606634		-0.184651		0.301245		Cellular Processes	Amino acid metabolism	Amino acid metabolism	Other	Cytoplasmic	CD2217	CD630_22170
CDIF630erm_02453	CD630_22200	Putative cyclic nucleotides-binding protein	-3.60355		-2.90986		2.91383	*	0.548337		Cellular Processes	Cofactors	NAD and NADP	Other	CytoplasmicMembrane	CD2220	CD630_22200
CDIF630erm_02460	CD630_22270	Putative radical SAM superfamily lipoprotein	-0.0523755		0.991212		-1.87333		-0.951424		Cellular Processes	Central energy metabolism	Electron transport	Other	Cytoplasmic	CD2227	CD630_22270
CDIF630erm_02461	CD630_22280	Uncharacterized protein	-2.13883		-3.32559	*	0.153305		-1.11578		Miscellaneous	Miscellaneous	Uncharacterized proteins	Other	Unknown	CD2228	CD630_22280	ccpA; SpoA
CDIF630erm_02463	CD630_22300	Putative formate/nitrite transporter			ON						Cellular Processes	Cofactors	Sulfur Metabolism	CD2230	CytoplasmicMembrane	CD2230	CD630_22300	ccpA; Fur
CDIF630erm_02464	asrC	Anaerobic sulfite reductase subunit C (EC 1.8.1.-)	ON		ON						Cellular Processes	Cofactors	Sulfur Metabolism	CD2230	Cytoplasmic	CD2231	CD630_22310	Fur
CDIF630erm_02465	asrB	Anaerobic sulfite reductase subunit B	ON		ON						Cellular Processes	Cofactors	Sulfur Metabolism	CD2230	Cytoplasmic	CD2232	CD630_22320	Fur
CDIF630erm_02466	asrA	Anaerobic sulfite reductase subunit A (Anaerobic sulfite reductase iron-sulfur subunit) (EC 1.12.2.1)	ON		ON						Cellular Processes	Cofactors	Sulfur Metabolism	CD2230	Cytoplasmic	CD2233	CD630_22330	Fur
CDIF630erm_02468	CD630_22350	Transcriptional regulator, RpiR family	OFF		-1.19178	*	3.16005		1.42279		Cellular Processes	Carbohydrate metabolism	Amino sugar metabolism	CD2234	Cytoplasmic	CD2235	CD630_22350
CDIF630erm_02469	CD630_22360	Putative glucokinase, ROK family (EC 2.7.1.-)							ON		Cellular Processes	Carbohydrate metabolism	Amino sugar metabolism	CD2234	Cytoplasmic	CD2236	CD630_22360
CDIF630erm_02471	CD630_22380	toxin-antitoxin biofilm protein							ON		Cellular Processes	Stress Response and virulence	Virulence	Other	Cytoplasmic	CD2238	CD630_22380
CDIF630erm_02473	nanA	N-acetylneuraminate lyase (NAL) (Neu5Ac lyase) (EC 4.1.3.3) (N-acetylneuraminate pyruvate-lyase) (N-acetylneuraminic acid aldolase) (Sialate lyase) (Sialic acid aldolase) (Sialic acid lyase)	OFF		-1.28634		-1.64432		OFF		Cellular Processes	Carbohydrate metabolism	Amino sugar metabolism	CD2234	Cytoplasmic	CD2240	CD630_22400
CDIF630erm_02475	CD630_22420	Uncharacterized protein	OFF		-0.470559		-1.88392				Miscellaneous	Miscellaneous	Uncharacterized proteins	Other	Cytoplasmic	CD2242	CD630_22420
CDIF630erm_02478	asnC	Asparagine--tRNA ligase (EC 6.1.1.22) (Asparaginyl-tRNA synthetase) (AsnRS)	0.213383		-0.924849		0.569608		0.669763	*	Cellular process	Protein synthesis	tRNA metabolism	Other	Cytoplasmic	CD2245	CD630_22450
CDIF630erm_02482	cspBA	Subtilisin-like serine germination related protease			ON						Cellular Processes	Sporulation and germination	Sporulation and germination	Other	Cytoplasmic	CD2247	CD630_22470	SigH; SigF; SigE; SpoA; SigB
CDIF630erm_02483	CD630_22480	uncharacterized protein, CoxE-like	OFF				0.614041		1.60156		Miscellaneous	Miscellaneous	Uncharacterized proteins	281257	Cytoplasmic	CD2248	CD630_22480	SigH; SigB
CDIF630erm_02484	CD630_22490	Putative ATPase	1.02909		1.04294		1.15986		1.27659	*	Miscellaneous	Miscellaneous	Uncharacterized proteins	281257	Cytoplasmic	CD2249	CD630_22490	SigH
CDIF630erm_02485	CD630_22500	Putative membrane protein		*	OFF				-2.07971		Cell Envelope	Cell membrane	Cell membrane	Other	CytoplasmicMembrane	CD2250	CD630_22500
CDIF630erm_02487	eam	Glutamate 2,3-aminomutase (EC 5.4.3.9)	0.898945		0.356601		-0.436003		0.870322		Cellular Processes	Amino acid metabolism	Glutamine, glutamate, aspartate and asparagine metabolism	Glutamine, glutamate, aspartate and asparagine metabolism	Cytoplasmic	CD2252	CD630_22520	Hfq; SigB
CDIF630erm_02489	CD630_22540	Asp/Glu racemase	OFF				OFF				Cellular Processes	Amino acid metabolism	Glutamine, glutamate, aspartate and asparagine metabolism	Glutamine, glutamate, aspartate and asparagine metabolism	Cytoplasmic	CD2254	CD630_22540
CDIF630erm_02490	CD630_22550	Uncharacterized protein			OFF				OFF		Miscellaneous	Miscellaneous	Uncharacterized proteins	Other	Unknown	CD2255	CD630_22550
CDIF630erm_02492	CD630_22580	Uncharacterized protein	-0.595648		-1.04042		0.389434		0.789546		Miscellaneous	Miscellaneous	Uncharacterized proteins	Other	Unknown	CD2258	CD630_22580
CDIF630erm_02493	CD630_22590	Cupin domain protein	-1.22911		0.850579		-2.29741	*	-3.21675		Cellular Processes	Carbohydrate metabolism	Carbohydrate utilization	Other	Cytoplasmic	CD2259	CD630_22590	ccpA
CDIF630erm_02495	ampP	xaa-pro aminopeptidase	0.114826		1.25054		-2.28689		-1.41321		Cellular process	Protein folding and degradation	Peptidases	Other	Cytoplasmic	CD2261	CD630_22610	SigH; Hfq; SpoA; SigB
CDIF630erm_02496	CD630_22620	Transporter, Major Facilitator Superfamily (MFS)			ON						Cellular Processes	Amino acid metabolism	Uptake of amino acids	Other	CytoplasmicMembrane	CD2262	CD630_22620	SpoA; SigB
CDIF630erm_02497	prsA	Peptidylprolyl isomerase (EC 5.2.1.8)	-0.192899		-2.03767	*	0.481462		-0.742973		Cellular process	Protein folding and degradation	Peptidyl-prolyl cis-trans isomerase	Other	CytoplasmicMembrane	CD2263	CD630_22630	SigH; SigB
CDIF630erm_02498	CD630_22640	Uncharacterized protein			OFF		-0.233992		2.05702		Miscellaneous	Miscellaneous	Uncharacterized proteins	Other	Cytoplasmic	CD2264	CD630_22640
CDIF630erm_02503	fruABC	PTS system, fructose-specific IIABC component (EC 2.7.1.69)	-3.12087	*	-3.9887	*	-0.223373		-2.63097	*	Cellular Processes	Carbohydrate metabolism	Fructose	281260	CytoplasmicMembrane	CD2269	CD630_22690	Hfq; SigF; SigB
CDIF630erm_02504	fruK	fructose 1-phosphate kinase	-2.61727	*	-1.48411		-2.04885	*	-2.07357		Cellular Processes	Carbohydrate metabolism	Fructose	281260	Unknown	CD2270	CD630_22700	SigF; SigG
CDIF630erm_02505	CD630_22710	Transcription antiterminator, PTS operon regulator	ON				ON		ON		Cellular Processes	Carbohydrate metabolism	Fructose	281261	Cytoplasmic	CD2271	CD630_22710
CDIF630erm_02506	CD630_22720	putative protein-tyrosine phosphatase	-0.942968		-0.91177		1.39574		1.49547	*	Cellular Processes	Carbohydrate metabolism	Fructose	281261	Cytoplasmic	CD2272	CD630_22720
CDIF630erm_02509	topB2	DNA topoisomerase 3 (EC 5.99.1.2) (DNA topoisomerase III)	0.063775		-0.018676		0.147953		2.48477	*	Cellular Processes	DNA and RNA metabolism	DNA metabolism	Other	Cytoplasmic	CD2275	CD630_22750
CDIF630erm_02520	CD630_22850	Transcriptional regulator, GntR family	OFF		OFF		0.583934		0.934369		Cellular Processes	Regulation and cell signaling	Transcriptional regulators	GntR family transcriptional regulators	Cytoplasmic	CD2285	CD630_22850
CDIF630erm_02523	CD630_22880	Two-component sensor histidine kinase					ON		ON		Cellular Processes	Regulation and cell signaling	Uncharacterized two-component system	Other	CytoplasmicMembrane	CD2288	CD630_22880
CDIF630erm_02524	CD630_22890	Two-component response regulator	-1.78199		-2.42544		1.29011		-0.24599		Cellular Processes	Cofactors	Phosphate	Other	Cytoplasmic	CD2289	CD630_22890
CDIF630erm_02530	CD630_22950	Putative membrane protein	OFF		OFF	*	-0.324928		-1.47922		Cell Envelope	Cell membrane	Cell membrane	Other	Unknown	CD2295	CD630_22950
CDIF630erm_02537	CD630_23000	Uncharacterized protein	OFF		OFF		0.401508		0.748316		Miscellaneous	Miscellaneous	Uncharacterized proteins	Other	Unknown	CD2300	CD630_23000
CDIF630erm_02542	CD630_23050	Major pilin	OFF				0.645081				Cell Envelope	Adhesion and motility	Type IV pilus	Other	CytoplasmicMembrane	CD2305	CD630_23050
CDIF630erm_02549	CD630_23110	ABC-type transport system, molybdenum-like extracellular solute-binding protein	-1.49772		-2.42821	*	0.572313		-1.51702	*	Cellular Processes	Cofactors	Molybdem	Other	Unknown	CD2311	CD630_23110
CDIF630erm_02552	CD630_23140	Uncharacterized protein					ON		ON		Miscellaneous	Miscellaneous	Uncharacterized proteins	Other	Unknown	CD2314	CD630_23140
CDIF630erm_02554	CD630_23160	Two-component response regulator			OFF		ON		0.280788		Cellular Processes	Regulation and cell signaling	Uncharacterized two-component system	Other	Cytoplasmic	CD2316	CD630_23160	SigE
CDIF630erm_02556	algC	Putative phosphohexomutase (EC 5.4.2.-)	-0.0611434		-0.692659		-1.64921	*	-2.07584		Cellular Processes	Central energy metabolism	Pentose phosphate pathway	CD2318	Cytoplasmic	CD2318	CD630_23180	SigH; SigB
CDIF630erm_02557	rpe	ribulose-phosphate 3-epimerase	-0.132123		1.52424		1.26941		1.42538		Cellular Processes	Central energy metabolism	Pentose phosphate pathway	CD2318	Cytoplasmic	CD2319	CD630_23190
CDIF630erm_02558	rpiB1	Ribose-5-phosphate isomerase B1 (Phosphoriboisomerase B) (EC 5.3.1.6)	-0.485407		-0.304132		-2.13423	*	-3.9673		Cellular Processes	Central energy metabolism	Pentose phosphate pathway	CD2318	Cytoplasmic	CD2320	CD630_23200
CDIF630erm_02559	tkt'	Transketolase, central and C-terminal (Sedoheptulose-7-phosphate:D-glyceraldehyde-3-phosphate glycolaldehydetransferase) (EC 2.2.1.1)	-0.565748		-0.344848		-1.65339		-1.7056		Cellular Processes	Central energy metabolism	Pentose phosphate pathway	CD2318	Cytoplasmic	CD2321	CD630_23210	SigH; SigB
CDIF630erm_02560	tkt1	Transketolase, N-terminal (Sedoheptulose-7-phosphate:D-glyceraldehyde-3-phosphate glycolaldehydetransferase) (EC 2.2.1.1)	-0.899132		0.364566		-1.4473		-1.48381		Cellular Processes	Central energy metabolism	Pentose phosphate pathway	CD2318	Cytoplasmic	CD2322	CD630_23220	SigH; SigB
CDIF630erm_02561	CD630_23230	D-arabitol-phosphate dehydrogenase	OFF				OFF				Cellular Processes	Central energy metabolism	Pentose phosphate pathway	CD2318	Cytoplasmic	CD2323	CD630_23230	ccpA; SigD; Fur; RpoN (Target)
CDIF630erm_02562	xpdH1	xylitol-phosphate dehydrogenase	OFF						-1.09617		Cellular Processes	Central energy metabolism	Pentose phosphate pathway	CD2318	Cytoplasmic	CD2324	CD630_23240	ccpA; SigD; Fur; RpoN (Target); SigB
CDIF630erm_02563	CD630_23250	PTS system, arabitol / xylitol-specific IIC component	OFF		OFF				OFF		Cellular Processes	Carbohydrate metabolism	Fructose and mannitol	CD2318	CytoplasmicMembrane	CD2325	CD630_23250	SigD; RpoN (Target); SigB
CDIF630erm_02564	CD630_23260	PTS system, arabitol / xylitol-specific IIB component	-0.671292				-1.29298		-0.224022		Cellular Processes	Carbohydrate metabolism	Fructose and mannitol	CD2318	Cytoplasmic	CD2326	CD630_23260	SigD; RpoN (Target); SigB
CDIF630erm_02566	CD630_23280	Transcription antiterminator, PTS operon regulator	-0.872237		0.968358		1.21654		0.749549		Cellular Processes	Carbohydrate metabolism	Fructose and mannitol	Other	Cytoplasmic	CD2328	CD630_23280	RpoN (EBP)
CDIF630erm_02567	tal	Probable transaldolase (EC 2.2.1.2)	-1.17073	*	-0.683194		-1.75321	*	-3.77515	*	Cellular Processes	Central energy metabolism	Pentose phosphate pathway	Other	Cytoplasmic	CD2329	CD630_23290
CDIF630erm_02568	xpt	Xanthine phosphoribosyltransferase (XPRTase) (EC 2.4.2.22)	-0.658766		-1.30177		2.5235	*	0.766257		Cellular Processes	DNA and RNA metabolism	Nucleosides and nucleotide metabolism	Other	Cytoplasmic	CD2330	CD630_23300	SpoA
CDIF630erm_02570	mtlD	Mannitol-1-phosphate 5-dehydrogenase (EC 1.1.1.17)	0.152872		1.20187	*	-1.48607	*	-1.69159		Cellular Processes	Carbohydrate metabolism	Mannitol	CD2331	Cytoplasmic	CD2331	CD630_23310	ccpA
CDIF630erm_02571	mtlF	PTS system, mannitol-specific, EIIA component (EC 2.7.1.69)	1.71105			*	0.25463				Cellular Processes	Carbohydrate metabolism	Mannitol	CD2331	CytoplasmicMembrane	CD2332	CD630_23320	ccpA
CDIF630erm_02573	mtlA	PTS system, mannitol-specific, IICB component (EC 2.7.1.69)	-0.610888		-2.37837	*	-0.00558183		-1.95154	*	Cellular Processes	Carbohydrate metabolism	Mannitol	CD2331	CytoplasmicMembrane	CD2334	CD630_23340	ccpA
CDIF630erm_02574	guaB	Inositol-5'-monophosphate dehydrogenase (IMP dehydrogenase) (IMPDH) (IMPD) (EC 1.1.1.205)	-0.0737062		-0.97557		-1.62155	*	-3.27276	*	Cellular Processes	DNA and RNA metabolism	Nucleosides and nucleotide metabolism	Other	Cytoplasmic	CD2335	CD630_23350
CDIF630erm_02575	CD630_23360	Putative toxic anion resistance protein	-0.375924		-2.38406		2.3892		0.733486		Cellular Processes	Stress Response and virulence	Resistance to Other stresses than antibiotics	Other	Cytoplasmic	CD2336	CD630_23360
CDIF630erm_02576	CD630_23370	Putative membrane protein			OFF						Cell Envelope	Cell membrane	Cell membrane	Other	CytoplasmicMembrane	CD2337	CD630_23370
CDIF630erm_02577	4hbD	4-hydroxybutyrate dehydrogenase (4-hydroxybutanoate:NAD+ oxidoreductase) (EC 1.1.1.61)	-0.117973		1.18926		-1.24442		-0.582825		Cellular Processes	Central energy metabolism	Succinate fermentation	CD2338	Cytoplasmic	CD2338	CD630_23380	SigH; ccpA; Hfq; CodY; SpoA; SigB
CDIF630erm_02578	cat2	4-hydroxybutyryl-CoA:coenzyme A transferase	0.091415		0.627803		0.483213		1.03941		Cellular Processes	Central energy metabolism	Succinate fermentation	CD2338	Cytoplasmic	CD2339	CD630_23390	SigH; CodY; SpoA; SigB
CDIF630erm_02580	abfD	Gamma-aminobutyrate metabolism dehydratase/isomerase [includes: 4-hydroxybutyryl-coa dehydratase vinylacetyl-coa-delta-isomerase] (EC 4.2.1.-) (EC 5.3.3.3)	0.207135		0.790115		-1.83084		-3.32291		Cellular Processes	Central energy metabolism	Succinate fermentation	CD2338	Cytoplasmic	CD2341	CD630_23410	SigH; CodY; SpoA; SigB
CDIF630erm_02581	sucD	Succinate-semialdehyde dehydrogenase (NAD(P)+) (EC 1.2.1.16)	-0.433773		-0.601993		0.0757391		0.292472		Cellular Processes	Central energy metabolism	Succinate fermentation	CD2342	Cytoplasmic	CD2342	CD630_23420	SigH; CodY; SpoA; SigB
CDIF630erm_02582	cat1	Succinyl-CoA:coenzyme A transferase (EC 2.8.3.-)	-0.747846		-1.19595		1.83152	*	1.65788	*	Cellular Processes	Central energy metabolism	Succinate fermentation	CD2342	Cytoplasmic	CD2343	CD630_23430	SigH; CodY; SpoA; SigB
CDIF630erm_02583	CD630_23440	putative succinate transporter	-1.10551		-1.47146	*	0.319815		-1.04647	*	Cellular Processes	Central energy metabolism	Succinate fermentation	CD2342	CytoplasmicMembrane	CD2344	CD630_23440	ccpA; CodY; SpoA
CDIF630erm_02584	CD630_23450	Transcriptional regulator, LysR family	-0.202744		-0.313307		1.02024		1.32186	*	Cellular Processes	Regulation and cell signaling	Transcriptional regulators	LysR family transcriptional regulators	Cytoplasmic	CD2345	CD630_23450	ccpA
CDIF630erm_02586	proP	Xaa-Pro dipeptidase (EC 3.4.13.9)	0.334845		0.149174		1.70758	*	1.20609	*	Cellular process	Protein folding and degradation	Peptidases	Other	Cytoplasmic	CD2347	CD630_23470	ccpA; CodY; SigB
CDIF630erm_02587	grdD	Glycine reductase complex component C subunit alpha (Protein PC alpha) (EC 1.21.4.2) (EC 1.21.4.3) (EC 1.21.4.4)	-2.27192		-1.05264		-3.48485		-3.18854		Cellular Processes	Stress Response and virulence	Oxidative stress	281277	Cytoplasmic	CD2348	CD630_23480	SigH
CDIF630erm_02588	grdC	Glycine reductase complex component C subunit beta (Protein PC beta) (EC 1.21.4.2)	-1.94702	*	-1.70194	*	-2.34682	*	-3.97745	*	Cellular Processes	Stress Response and virulence	Oxidative stress	281277	Cytoplasmic	CD2349	CD630_23490	SigH; Hfq
CDIF630erm_02589	grdB	Glycine reductase complex component B gamma subunit (Selenocysteine) (EC 1.21.4.2)	-2.48349		-0.902542		-2.62746		-3.47507		Cellular Processes	Stress Response and virulence	Oxidative stress	Other	Cytoplasmic	CD2351	CD630_23510	SigH; Fur; SpoA
CDIF630erm_02594	grdE	Glycine reductase complex component B subunits alpha and beta (Selenoprotein PB alpha/beta) (EC 1.21.4.2)	-2.16694		-0.47654		-1.70222		0.99746		Cellular Processes	Stress Response and virulence	Oxidative stress	CD2352	Cytoplasmic	CD2354	CD630_23540	SigH
CDIF630erm_02595	trxA2	Thioredoxin	-0.19551		1.60495		-1.91383		-2.90195		Cellular Processes	Stress Response and virulence	Oxidative stress	CD2352	Cytoplasmic	CD2355	CD630_23550	SigH
CDIF630erm_02596	trxB3	Thioredoxin reductase (EC 1.8.1.9)	-1.85667		-0.954621		-0.314739		-0.310304		Cellular Processes	Stress Response and virulence	Oxidative stress	CD2352	Cytoplasmic	CD2356	CD630_23560	SigH; Hfq; SpoA
CDIF630erm_02598	CD630_23580	Oligoendopeptidase-related, clade2, M3B family					ON		ON		Cellular process	Protein folding and degradation	Peptidases	Other	Cytoplasmic	CD2358	CD630_23580
CDIF630erm_02599	CD630_23590	Putative hydrolase, HAD superfamily, subfamily IIB (EC 3.1.3.-)	OFF	*	OFF	*	3.20766		1.92341		Miscellaneous	Miscellaneous	Uncharacterized proteins	Other	Cytoplasmic	CD2359	CD630_23590
CDIF630erm_02600	CD630_23600	Uncharacterized protein	OFF	*	OFF		3.43923		1.94276		Miscellaneous	Miscellaneous	Uncharacterized proteins	Other	Unknown	CD2360	CD630_23600
CDIF630erm_02601	CD630_23610	ABC-type transport system,nitrate/sulfonate/taurine ATP-binding protein (EC 3.6.3.-)	-1.68795		-2.45276		1.23574		0.79692		Cellular Processes	Cofactors	Nitrogen and sulfur metabolism	CD2360	CytoplasmicMembrane	CD2361	CD630_23610	SigH
CDIF630erm_02602	CDIF630erm_02602	ABC-type transport system, sulfonates-family permease	OFF		OFF		0.909981		-1.14778		Miscellaneous	Miscellaneous	Uncharacterized proteins	Other	CytoplasmicMembrane	CD2362	CD630_23620
CDIF630erm_02605	CD630_23650	ABC-type transport system,nitrate/sulfonate/taurine extracellular solute-binding protein	0.27969		0.886574		-0.805264		-1.82401		Cellular Processes	Cofactors	Nitrogen and sulfur metabolism	CD2360	Unknown	CD2365	CD630_23650	Hfq
CDIF630erm_02606	CD630_23660	Uncharacterized protein	-2.1322		-3.39101	*	0.442708		-1.64229	*	Miscellaneous	Miscellaneous	Uncharacterized proteins	CD2360	Unknown	CD2366	CD630_23660	SigH; Hfq
CDIF630erm_02608	CD630_23680	Uncharacterized protein	-0.0550596		-0.482135		1.85298		0.997119		Miscellaneous	Miscellaneous	Uncharacterized proteins	CD2360	Unknown	CD2368	CD630_23680
CDIF630erm_02609	CD630_23690	Uncharacterized protein	0.0655307				-0.772419				Miscellaneous	Miscellaneous	Uncharacterized proteins	Other	Cytoplasmic	CD2369	CD630_23690	Hfq
CDIF630erm_02611	nadB	L-aspartate oxidase (Quinolinate synthetase B) (EC 1.4.3.16)			OFF		ON		0.630476		Cellular Processes	Cofactors	NAD and NADP	CD2370	Cytoplasmic	CD2371	CD630_23710	SigB
CDIF630erm_02612	nadA	Quinolinate synthase A (EC 2.5.1.72)					ON				Cellular Processes	Cofactors	NAD and NADP	CD2370	Cytoplasmic	CD2372	CD630_23720
CDIF630erm_02613	CD630_23730	Putative CstA-like carbon starvation protein	1.31444		0.906452		-0.222178		-1.73876		Cellular Processes	Stress Response and virulence	Nutrient limitation	Other	CytoplasmicMembrane	CD2373	CD630_23730	SigH; SpoA; SigB
CDIF630erm_02617	CD630_23770	Putative hydrolase, NUDIX family	OFF		OFF		1.95707		0.109402		Cellular Processes	Fatty Acids	Degradation of fatty acids	Other	Cytoplasmic	CD2377	CD630_23770	SigF
CDIF630erm_02619	buk2	indole-3-acetate kinase	1.22371		1.16223		1.36966		1.24422		Cellular Processes	Amino acid metabolism	Fermentation of aromatic amino acids	CD2379	Cytoplasmic	CD2379	CD630_23790	SpoA; RpoN (Target); SigB
CDIF630erm_02620	iorB	indolepyruvate oxidoreductase, sununit beta	2.02352		2.40066	*	-0.845095		-1.01899		Cellular Processes	Amino acid metabolism	Fermentation of aromatic amino acids	CD2379	Cytoplasmic	CD2380	CD630_23800	CodY; SpoA; RpoN (Target); SigB
CDIF630erm_02621	iorA	indolepyruvate oxidoreductase, sununit alpha	2.34329		3.36352	*	-1.74837		-1.02449		Cellular Processes	Amino acid metabolism	Fermentation of aromatic amino acids	CD2379	Cytoplasmic	CD2381	CD630_23810	SpoA; RpoN (Target); SigB
CDIF630erm_02622	CD630_23820	aromatic-amino-acid aminotransferase, tyrB-like	3.09382		3.92526	*	OFF		-2.33323		Cellular Processes	Amino acid metabolism	Fermentation of aromatic amino acids	CD2379	Cytoplasmic	CD2382	CD630_23820	SpoA; RpoN (Target); SigB
CDIF630erm_02623	CD630_23830	Transcriptional regulator, sigma-54-dependent			OFF		ON		0.556004		Cellular Processes	Stress Response and virulence	RpoN dependent stress reponse	Other	Cytoplasmic	CD2383	CD630_23830	RpoN (EBP)
CDIF630erm_02628	CD630_23870	Alpha-hydroxy acid dehydrogenase,FMN-dependent	-0.355181		-0.177312		OFF		OFF		Cellular Processes	Central energy metabolism	Fermentation	Other	Cytoplasmic	CD2387	CD630_23870	SigH; Hfq
CDIF630erm_02629	CD630_23880	Putative peptidoglycan-binding/hydrolysing protein	OFF				OFF		OFF		Cell Envelope	Cell wall	Cell wall biosynthesis	Other	Extracellular	CD2388	CD630_23880
CDIF630erm_02631	CD630_23900	Transcriptional regulator, beta-lactams repressor	1.52438		1.2218		0.162129		0.354558		Cellular Processes	Regulation and cell signaling	Transcriptional regulators	Other	Cytoplasmic	CD2390	CD630_23900
CDIF630erm_02633	CD630_23920	Putative tRNA-binding protein	1.49062		1.58813		OFF		0.649695		Cellular process	Protein synthesis	tRNA metabolism	Other	Cytoplasmic	CD2392	CD630_23920
CDIF630erm_02635	CD630_23930	Putative glycosyl transferase, family 51	OFF		OFF	*	-0.312707		-2.32064		Cell Envelope	Cell wall	Peptidoglycan turnover	Other	CytoplasmicMembrane	CD2393	CD630_23930
CDIF630erm_02636	dnaQ	DNA polymerase III, epsilon subunit (EC 2.7.7.7)	OFF		-0.067321	*	1.56913	*	1.56423		Cellular Processes	DNA and RNA metabolism	DNA metabolism	Other	Cytoplasmic	CD2394	CD630_23940	ccpA; SigB
CDIF630erm_02638	CD630_23960	Uncharacterized protein	-0.750505		0.531945		-2.00621	*	OFF		Miscellaneous	Miscellaneous	Uncharacterized proteins	Other	Unknown	CD2396	CD630_23960	ccpA; SpoA
CDIF630erm_02639	CD630_23970	Putative exonuclease					ON		ON		Cellular Processes	DNA and RNA metabolism	RNA Processing	281286	Cytoplasmic	CD2397	CD630_23970
CDIF630erm_02640	ttcA1	Putative 2-thiocytidine tRNA biosynthesis protein TtcA	-0.0692149		-1.28189		0.556735		0.98971	*	Cellular Processes	DNA and RNA metabolism	RNA Processing	281286	Cytoplasmic	CD2398	CD630_23980
CDIF630erm_02643	cotD	Spore coat protein, manganese catalase	3.79415		3.27376		OFF		OFF		Cellular Processes	Sporulation and germination	Sporulation and germination	Other	Cytoplasmic	CD2401	CD630_24010	Hfq; SigF; SigE; SigK
CDIF630erm_02644	CD630_24020	Putative cell wall hydrolase phosphatase-associated protein (EC 3.4.-.-)	OFF		OFF		OFF		OFF		Cell Envelope	Cell wall	Peptidoglycan turnover	Other	Extracellular	CD2402	CD630_24020	Hfq
CDIF630erm_02645	dut	Deoxyuridine 5'-triphosphate nucleotidohydrolase (dUTPase) (EC 3.6.1.23) (dUTP pyrophosphatase)	-0.88964	*	0.374609		-1.98751	*	OFF		Cellular Processes	DNA and RNA metabolism	Nucleosides and nucleotide metabolism	Other	Cytoplasmic	CD2403	CD630_24030
CDIF630erm_02646	CD630_24040	DNA topoisomerase type IA (EC 5.99.1.2)					ON		ON		Cellular Processes	DNA and RNA metabolism	DNA metabolism	Other	Cytoplasmic	CD2404	CD630_24040
CDIF630erm_02647	CD630_24050	Transcriptional regulator, MarR family	-0.6219		-0.0820478		-0.544733		-0.118818		Cellular Processes	Regulation and cell signaling	Transcriptional regulators	MarR family transcriptional regulators	Cytoplasmic	CD2405	CD630_24050
CDIF630erm_02648	CD630_24060	Putative lipoprotein	-0.498498	*	OFF		1.16978		-0.364747		Cell Envelope	Cell membrane	Cell membrane	Other	Cytoplasmic	CD2406	CD630_24060
CDIF630erm_02649	CD630_24070	Putative multidrug efflux pump	-1.4988		-0.59178		-1.98306		-1.1622		Cellular Processes	Stress Response and virulence	Multi-drug transport	CD2406	CytoplasmicMembrane	CD2407	CD630_24070
CDIF630erm_02650	CD630_24080	Putative multidrug efflux pump	2.07566		-0.885643				-2.05003		Cellular Processes	Stress Response and virulence	Multi-drug transport	CD2406	Unknown	CD2408	CD630_24080
CDIF630erm_02652	ppdK	pyruvate phosphate dikinase	-0.559871		-0.538844		-1.70961		-0.0922437		Cellular Processes	Regulation and cell signaling	Transcriptional regulators	CD2411	Cytoplasmic	CD2410	CD630_24100
CDIF630erm_02653	CD630_24110	pyruvate, phosphate dikinase regulatory protein	-0.878319		-0.401726		-0.0939858		0.989484		Cellular Processes	Regulation and cell signaling	Transcriptional regulators	CD2410	Cytoplasmic	CD2411	CD630_24110	SigB
CDIF630erm_02654	CD630_24120	Putative transcriptional repressor ccpn	-0.602035		-0.428806		1.01133		0.932376		Cellular Processes	Regulation and cell signaling	Transcriptional regulators	CD2410	Cytoplasmic	CD2412	CD630_24120	SigB
CDIF630erm_02655	CD630_24130	Putative NAD(P)-binding protein			0.68285				OFF		Cellular Processes	Amino acid metabolism	Amino acid metabolism	Other	Cytoplasmic	CD2413	CD630_24130	ccpA
CDIF630erm_02662	CD630_24200	putative peptidase C45					ON		ON		Miscellaneous	Miscellaneous	Uncharacterized proteins	Other	Cytoplasmic	CD2420	CD630_24200
CDIF630erm_02663	CD630_24210	putative amidohydrolase, M20D family					ON		ON		Cellular process	Protein folding and degradation	Peptidases	Other	Cytoplasmic	CD2421	CD630_24210	ccpA
CDIF630erm_02673	CD630_24300	Transcriptional regulator, IclR family	-0.629494		-0.476792		1.03532		0.961783		Cellular Processes	Regulation and cell signaling	Transcriptional regulators	IclR family transcriptional regulators	Cytoplasmic	CD2430	CD630_24300
CDIF630erm_02675	glyS	Glycine--tRNA ligase beta subunit (EC 6.1.1.14) (Glycyl-tRNA synthetase beta subunit) (GlyRS)	-0.272346		0.0691775		-1.01602		0.774216		Cellular process	Protein synthesis	tRNA metabolism	281295	Cytoplasmic	CD2432	CD630_24320
CDIF630erm_02676	glyQ	Glycine--tRNA ligase alpha subunit (EC 6.1.1.14) (Glycyl-tRNA synthetase alpha subunit) (GlyRS)	0.0110626		-0.222521		-0.536552		0.319651		Cellular process	Protein synthesis	tRNA metabolism	281295	Cytoplasmic	CD2433	CD630_24330
CDIF630erm_02677	CD630_24340	Uncharacterized protein	0.0603103		1.02531		-1.75243	*	-2.52984		Miscellaneous	Miscellaneous	Uncharacterized proteins	Other	Cytoplasmic	CD2434	CD630_24340	SigB
CDIF630erm_02680	CD630_24360	putative divalent cation transporter, MgtE family	OFF		-3.35229	*	2.44498	*	1.11717		Cellular Processes	Cofactors	Cation transporters	Other	CytoplasmicMembrane	CD2436	CD630_24360	SigB
CDIF630erm_02681	era	GTPase Era	-1.52864		-2.02662		-1.15521		0.103993		Cellular process	Protein synthesis	Ribosome biogenesis	CD2436	CytoplasmicMembrane	CD2437	CD630_24370	SigE; SigB
CDIF630erm_02682	cdd	Cytidine deaminase (EC 3.5.4.5) (Cytidine aminohydrolase)			0.683691		-0.96951		OFF		Cellular Processes	DNA and RNA metabolism	Nucleosides and nucleotide metabolism	Other	Cytoplasmic	CD2438	CD630_24380	ccpA; SigB
CDIF630erm_02684	ybeY	Endoribonuclease YbeY (EC 3.1.-.-)			OFF				OFF		Cellular process	Protein synthesis	Translation	CD2436	Cytoplasmic	CD2440	CD630_24400	SigE; Fur; SigB
CDIF630erm_02685	CD630_24411	PhoH-like protein	-0.45341		-0.454349		-2.06262		-1.15832		Cellular Processes	Regulation and cell signaling	C-di-GMP signaling	Other	Cytoplasmic	CD2441a	CD630_24411	SigF; SigE
CDIF630erm_02688	hpf	Ribosome hibernation promoting factor (HPF)	-0.182126		-0.936591		0.693981		0.602822		Cellular process	Protein synthesis	Ribosome biogenesis	Other	Cytoplasmic	CD2444	CD630_24440
CDIF630erm_02690	rpsU	30S ribosomal protein S21	-1.47106	*	-0.923526		-1.50278	*	-1.21442		Cellular process	Protein synthesis	Ribosome biogenesis	CD2446	Cytoplasmic	CD2446a	CD630_24460
CDIF630erm_02691	rpsU	30S ribosomal protein S21	-0.275837				-0.605953				Cellular process	Protein synthesis	Ribosome biogenesis	Other	Cytoplasmic	CD2446	CD630_24460
CDIF630erm_02692	CD630_24470	Putative histidine triad (HIT) protein	0.16965		0.858343		-1.77445		-3.57841		Miscellaneous	Miscellaneous	Uncharacterized proteins	Other	Cytoplasmic	CD2447	CD630_24470	SigH
CDIF630erm_02693	mtaB	threonylcarbamoyladenosine tRNA methylthiotransferase	-1.51085		-5.05273	*	2.15207	*	0.541457		Cellular process	Protein synthesis	tRNA metabolism	CD2446	Cytoplasmic	CD2448	CD630_24480
CDIF630erm_02695	prmA	Ribosomal protein L11 methyltransferase (L11 Mtase) (EC 2.1.1.-)	-0.648419		-0.932962		0.399922		-0.0423875		Cellular process	Protein synthesis	Ribosome biogenesis	CD2446	Cytoplasmic	CD2450	CD630_24500
CDIF630erm_02696	CD630_24510	Putative CRISPR-associated ATP-dependent helicase	-0.153783		1.45645		0.414295		1.34936		Cellular Processes	Stress Response and virulence	Prophages	CD2451	Cytoplasmic	CD2451	CD630_24510
CDIF630erm_02697	CD630_24520	Putative CRISPR-associated protein	-0.893561								Cellular Processes	Stress Response and virulence	Prophages	CD2451	Cytoplasmic	CD2452	CD630_24520
CDIF630erm_02698	CD630_24530	Putative CRISPR-associated negative autoregulator	0.550609		0.862104		-1.88449		-1.5535		Cellular Processes	Stress Response and virulence	Prophages	CD2451	Cytoplasmic	CD2453	CD630_24530
CDIF630erm_02699	CD630_24540	Uncharacterized protein	-0.926196		-0.41755		-0.203933		0.0933316		Cellular Processes	Stress Response and virulence	Prophages	CD2451	Cytoplasmic	CD2454	CD630_24540
CDIF630erm_02700	CD630_24550	Putative CRISPR-associated protein	-0.79844		-1.35928		0.944631		0.789154		Cellular Processes	Stress Response and virulence	Prophages	CD2451	Cytoplasmic	CD2455	CD630_24550
CDIF630erm_02702	CD630_24560	ABC-type transport system, sugar-family ATP-binding protein (EC 3.6.3.-)	-0.244893		-0.215879		0.18866		-0.460012		Cellular Processes	Carbohydrate metabolism	Carbohydrate uptake	Other	CytoplasmicMembrane	CD2456	CD630_24560
CDIF630erm_02705	glcK	glucokinase	-0.790062		-0.814028		1.14502		0.913823		Cellular Processes	Energy metabolism	Glycolysis and gluconeogenesis	Other	Cytoplasmic	CD2459	CD630_24590
CDIF630erm_02706	dnaJ	Chaperone protein DnaJ	-0.509868		-0.539282		-0.0331097		0.417746		Cellular Processes	Stress Response and virulence	Universal stress response	CD2460	Cytoplasmic	CD2460	CD630_24600
CDIF630erm_02707	dnaK	Chaperone protein DnaK (HSP70) (Heat shock 70 kDa protein) (Heat shock protein 70)	-1.00204		-0.685668		-1.73419	*	-2.27551		Cellular Processes	Stress Response and virulence	Universal stress response	CD2460	Cytoplasmic	CD2461	CD630_24610	ccpA
CDIF630erm_02708	grpE	Protein GrpE (HSP-70 cofactor)	-1.45039	*	-1.67521		-1.46024	*	-1.63811		Cellular Processes	Stress Response and virulence	Universal stress response	CD2460	Cytoplasmic	CD2462	CD630_24620	Hfq
CDIF630erm_02709	hrcA	Heat-inducible transcription repressor HrcA	OFF		-4.27008	*	2.82083		0.782893		Cellular Processes	Stress Response and virulence	Universal stress response	CD2460	Cytoplasmic	CD2463	CD630_24630	ccpA
CDIF630erm_02710	hemN	oxygen-independent coproporphyrinogen-III oxidase							ON		Cellular Processes	Cofactors	Heme, porphyrin and cobalamin	Other	Cytoplasmic	CD2464	CD630_24640
CDIF630erm_02713	lepA	Elongation factor 4 (EF-4) (EC 3.6.5.n1) (Ribosomal back-translocase LepA)	-0.791982		-1.31478		0.788167		1.50803	*	Cellular process	Protein synthesis	Translation	Other	CytoplasmicMembrane	CD2467	CD630_24670
CDIF630erm_02715	spoIIP	Stage II sporulation protein P	ON		ON						Cellular Processes	Sporulation and germination	Sporulation and germination	Other	Unknown	CD2469	CD630_24690	SigH; SigF; SpoA; SigB
CDIF630erm_02718	CD630_24720	Transcriptional regulator, ArsR family			OFF		ON		0.767226		Cellular Processes	Regulation and cell signaling	Transcriptional regulators	ArsR family transcriptional regulators	Unknown	CD2472	CD630_24720	ccpA
CDIF630erm_02719	rpsT	30S ribosomal protein S20	-1.21826		1.12606		-0.428198		0.439842		Cellular process	Protein synthesis	Ribosome biogenesis	Other	Cytoplasmic	CD2473	CD630_24730	SigH
CDIF630erm_02720	yqeN	Putative DNA polymerase III, delta subunit			OFF		ON		1.13508		Cellular Processes	DNA and RNA metabolism	DNA metabolism	Other	Cytoplasmic	CD2474	CD630_24740	SigB
CDIF630erm_02722	CD630_24760	Gnat family acetyltransferase			-1.20899		OFF				Miscellaneous	Miscellaneous	Uncharacterized proteins	281308	Unknown	CD2476	CD630_24760	c-di-GMP
CDIF630erm_02725	tcdA	tRNA threonylcarbamoyladenosine dehydratase	-1.32208		OFF		1.02714		0.886306		Cellular process	Protein synthesis	tRNA metabolism	Other	Cytoplasmic	CD2479	CD630_24790	Fur
CDIF630erm_02727	CD630_24800	Putative hydrolase	2.12945		ON		OFF				Miscellaneous	Miscellaneous	Uncharacterized proteins	Other	Unknown	CD2480	CD630_24800	ccpA
CDIF630erm_02728	ung	Uracil-DNA glycosylase (UDG) (EC 3.2.2.27)	-0.0636513		0.514151		-0.473391		0.616246		Cellular Processes	DNA and RNA metabolism	DNA repair	Other	Cytoplasmic	CD2481	CD630_24810
CDIF630erm_02730	apbE	FAD:protein FMN transferase (EC 2.7.1.180) (Flavin transferase)	-1.80412		-2.84157	*	-0.0258131		-1.05514	*	Cellular Processes	Cofactors	Riboflavin	Other	Unknown	CD2483	CD630_24830
CDIF630erm_02735	CD630_24880	PTS system, fructose-like IIA component			ON				ON		Cellular Processes	Carbohydrate metabolism	Fructose	CD2484	CytoplasmicMembrane	CD2488	CD630_24880	ccpA; c-di-GMP
CDIF630erm_02738	pmi	Mannose-6-phosphate isomerase (Phosphomannose isomerase) (PMI) (Phosphohexomutase) (EC 5.3.1.8)	0.305509		-0.793103		1.91116		1.26285		Cellular Processes	Carbohydrate metabolism	Mannose	Other	Unknown	CD2491	CD630_24910
CDIF630erm_02739	CD630_24920	Two-component sensor histidine kinase,sporulation-associated spo0A (EC 2.7.13.3)	-0.704229		-2.07128		1.37467		0.383047		Cellular Processes	Regulation and cell signaling	Uncharacterized two-component system	Other	CytoplasmicMembrane	CD2492	CD630_24920	SigH
CDIF630erm_02741	selB	Selenocysteinyl-tRNA-specific translation factor	-1.01388		-1.19005		-0.174813		1.63942	*	Cellular process	Protein synthesis	tRNA metabolism	CD2493	Cytoplasmic	CD2493	CD630_24930	SigB
CDIF630erm_02742	selA	L-seryl-tRNA(Sec) selenium transferase (EC 2.9.1.1) (Selenocysteine synthase) (Sec synthase) (Selenocysteinyl-tRNA(Sec) synthase)	-1.00748		-1.95044	*	-1.54343		-2.37841	*	Cellular process	Protein synthesis	tRNA metabolism	CD2493	Cytoplasmic	CD2495	CD630_24950	SigB
CDIF630erm_02743	selD	Selenide, water dikinase (EC 2.7.9.3) (Selenium donor protein) (Selenophosphate synthase)	-0.795151		-1.53897		1.75213		1.47305		Cellular process	Protein synthesis	tRNA metabolism	CD2493	Cytoplasmic	CD2496	CD630_24960	SigB
CDIF630erm_02745	dacF1	D-alanyl-D-alanine carboxypeptidase (Putative sporulation-specific penicillin-binding protein) (EC 3.4.16.4)	-1.55374		-1.81293		-0.278712		-1.04431		Cell Envelope	Cell wall	Cell wall biosynthesis	Penicillin-binding proteins	CytoplasmicMembrane	CD2498	CD630_24980
CDIF630erm_02747	argH	Argininosuccinate lyase (ASAL) (EC 4.3.2.1) (Arginosuccinase)	0.554309		0.582948						Cellular Processes	Amino acid metabolism	Amino acid metabolism	Other	Cytoplasmic	CD2500	CD630_25000	SigB
CDIF630erm_02749	ycsE	putative 5-amino-6-(5-phospho-D-ribitylamino)uracil phosphatase	-1.10022		-1.67866		2.48669	*	1.77122	*	Cellular Processes	DNA and RNA metabolism	Nucleosides and nucleotide metabolism	Other	Unknown	CD2501	CD630_25010
CDIF630erm_02750	CD630_25020	putative histidinol-phosphate aminotransferase	1.25747		0.817086		1.81153	*	1.10225	*	Cellular Processes	Amino acid metabolism	Amino acid metabolism	Other	Cytoplasmic	CD2502	CD630_25020	CodY; SpoA; SigB
CDIF630erm_02754	CD630_25050	Transcriptional regulator, TetR family	OFF	*			OFF		-1.87991		Cellular Processes	Regulation and cell signaling	Transcriptional regulators	TetR family	Cytoplasmic	CD2505	CD630_25050	ccpA
CDIF630erm_02757	CD630_25080	Transcriptional regulator, AraC family					ON		ON		Cellular Processes	Regulation and cell signaling	Carbohydrate metabolism	CD2507	Cytoplasmic	CD2508	CD630_25080	CodY
CDIF630erm_02758	pagL	phospho-alpha-glucosidase	1.16919		-1.01208		2.24682		1.09276		Cellular Processes	Carbohydrate metabolism	Carbohydrate utilization	CD2507	Cytoplasmic	CD2509	CD630_25090	CodY; SpoA; SigB
CDIF630erm_02759	CD630_25100	PTS system, maltose-specific IIBC component			OFF		ON		-0.78776		Cellular Processes	Carbohydrate metabolism	Maltose	CD2507	CytoplasmicMembrane	CD2510	CD630_25100	CodY
CDIF630erm_02760	CD630_25110	Transcription antiterminator, PTS operon regulator			-2.26939	*	ON		1.66198		Cellular Processes	Carbohydrate metabolism	Maltose	CD2507	Unknown	CD2511	CD630_25110	CodY
CDIF630erm_02761	CD630_25120	PTS system, maltose-specific IIA component	0.10287		-0.524385		1.45534		0.358718		Cellular Processes	Carbohydrate metabolism	Maltose	CD2507	Cytoplasmic	CD2512	CD630_25120	CodY
CDIF630erm_02762	yjgF	2-iminobutanoate / 2-iminopropanoate deaminase	-0.0914161		0.909055		-1.1771		-4.25745		Cellular Processes	DNA and RNA metabolism	RNA Processing	Other	Cytoplasmic	CD2513	CD630_25130	Hfq
CDIF630erm_02763	tdcB	Threonine dehydratase II (EC 4.3.1.19)	0.0814677		0.217252		-0.617183		0.22432		Cellular Processes	Amino acid metabolism	Amino acid metabolism	Other	Cytoplasmic	CD2514	CD630_25140	SigH; ccpA; Hfq; SpoA
CDIF630erm_02764	aspD	bifunctional aspartate aminotransferase / L-aspartate beta-decarboxylase	-0.0753538		-1.42008		1.14713		1.51864	*	Cellular Processes	Amino acid metabolism	Glutamine, glutamate, aspartate and asparagine metabolism	Glutamine, glutamate, aspartate and asparagine metabolism	Cytoplasmic	CD2515	CD630_25150
CDIF630erm_02765	ansB	L-asparaginase (EC 3.5.1.1)	-1.29915		-2.18478		1.92279	*	1.34776	*	Cellular Processes	Amino acid metabolism	Glutamine, glutamate, aspartate and asparagine metabolism	Glutamine, glutamate, aspartate and asparagine metabolism	Cytoplasmic	CD2516	CD630_25160
CDIF630erm_02769	cwp29	Cell surface protein cwp29	1.35912		3.96943	*	-0.047623		2.29685		Cell Envelope	Cell wall	SlpA and paralogues	Other	Cellwall	CD2518	CD630_25180	SigH; SigD; SpoA; SigB
CDIF630erm_02772	leuS	Leucine--tRNA ligase (EC 6.1.1.4) (Leucyl-tRNA synthetase) (LeuRS)	0.220231		0.0506121		-1.08367		-0.604762		Cellular process	Protein synthesis	tRNA metabolism	Other	Cytoplasmic	CD2521	CD630_25210
CDIF630erm_02774	rsfS	Ribosomal silencing factor RsfS	-0.448992		-0.07103		-0.383843		-1.39073		Cellular process	Protein synthesis	Ribosome rescue	Other	Cytoplasmic	CD2522	CD630_25220
CDIF630erm_02775	CD630_25230	Putative hydrolase	-0.192165		-1.00083		2.01531	*	0.473312		Miscellaneous	Miscellaneous	Uncharacterized proteins	Other	Cytoplasmic	CD2523	CD630_25230	SigB
CDIF630erm_02776	nadD	Probable nicotinate-nucleotide adenylyltransferase (EC 2.7.7.18) (Deamido-NAD(+) diphosphorylase) (Deamido-NAD(+) pyrophosphorylase) (Nicotinate mononucleotide adenylyltransferase) (NaMN adenylyltransferase)			OFF		ON		1.44665		Cellular Processes	Cofactors	NAD and NADP	Other	Unknown	CD2524	CD630_25240	SigB
CDIF630erm_02777	recX	Regulatory protein RecX	-0.582807		-1.71705		0.475773		0.973736		Cellular Processes	DNA and RNA metabolism	DNA repair	Other	Cytoplasmic	CD2525	CD630_25250
CDIF630erm_02778	glgB	1,4-alpha-glucan branching enzyme (EC 2.4.1.18)	-1.64646		-0.792195		-2.18194		0.518874		Cellular Processes	Carbohydrate metabolism	Biosynthesis and degradation of polysaccharides	Other	Unknown	CD2526	CD630_25260
CDIF630erm_02779	CD630_25270	Transcriptional regulator, TetR family	-1.68503		-0.680204		0.949655		0.133258		Cellular Processes	Regulation and cell signaling	Transcriptional regulators	TetR family	Cytoplasmic	CD2527	CD630_25270
CDIF630erm_02780	CD630_25280	Uncharacterized protein					2.40144				Miscellaneous	Miscellaneous	Uncharacterized proteins	Other	Cytoplasmic	CD2528	CD630_25280
CDIF630erm_02784	CD630_25320	putative serine-pyruvate aminotransferase	-2.09863	*	-1.28554		-1.53814		-2.23056		Cellular Processes	Amino acid metabolism	Amino acid metabolism	Other	Cytoplasmic	CD2532	CD630_25320	SigD; SigB
CDIF630erm_02786	CD630_25340	ABC-type transport system, ATP-binding protein (EC 3.6.3.-)					ON		ON		Cell Envelope	Cell membrane	Cell membrane	CD2533	CytoplasmicMembrane	CD2534	CD630_25340
CDIF630erm_02788	walR	Two-component response regulator			OFF		ON		0.686334		Cell Envelope	Cell membrane	Cell membrane	CD2533	Cytoplasmic	CD2536	CD630_25360
CDIF630erm_02790	CD630_25380	Putative lipoprotein	0.603668		1.96649		0.291331		0.615814		Cell Envelope	Cell membrane	Lipoproteins	Lipoproteins	Cytoplasmic	CD2538	CD630_25380
CDIF630erm_02791	rnz	Ribonuclease Z (RNase Z) (EC 3.1.26.11) (tRNA 3 endonuclease) (tRNase Z)	-0.973506		-1.9778		0.98265		0.959746	*	Cellular process	Protein synthesis	tRNA metabolism	Other	Cytoplasmic	CD2539	CD630_25390
CDIF630erm_02792	CD630_25400	Coenzyme A disulfide reductase (EC 1.8.1.14)	OFF		OFF		3.83341		1.18414		Cellular Processes	Cofactors	Pantothenate and coenzyme A	Other	Cytoplasmic	CD2540	CD630_25400	ccpA
CDIF630erm_02793	tcyP	putative L-cystine uptake protein	-1.9476		-4.25877	*	-0.402978		-1.19405	*	Cellular Processes	Amino acid metabolism	Glutamine, glutamate, aspartate and asparagine metabolism	Glutamine, glutamate, aspartate and asparagine metabolism	CytoplasmicMembrane	CD2541	CD630_25410	SigB
CDIF630erm_02794	CD630_25420	Uncharacterized protein			OFF				OFF		Miscellaneous	Miscellaneous	Uncharacterized proteins	Other	Unknown	CD2542	CD630_25420
CDIF630erm_02797	bcsA	Cellulose synthase catalytic subunit (UDP-forming) (EC 2.4.1.12)			OFF				-0.194023		Cellular Processes	Carbohydrate metabolism	Cellulose	Other	CytoplasmicMembrane	CD2545	CD630_25450
CDIF630erm_02799	CD630_25470	Uncharacterized protein	-0.760809		-0.131943		-2.9764	*	-3.3237		Miscellaneous	Miscellaneous	Uncharacterized proteins	Other	Cytoplasmic	CD2547	CD630_25470	SigH; Hfq
CDIF630erm_02800	CD630_25480	ABC-type transport system, sugar-family permease	OFF	*	-3.59867		-0.30956		OFF		Cellular Processes	Carbohydrate metabolism	Carbohydrate uptake	CD2547	CytoplasmicMembrane	CD2548	CD630_25480	SigH
CDIF630erm_02802	CD630_25500	ABC-type transport system, sugar-family extracellular solute-binding protein	0.0503349		-0.741633		0.764919		-0.365763		Cellular Processes	Carbohydrate metabolism	Carbohydrate uptake	CD2547	Unknown	CD2550	CD630_25500	SigH; Hfq
CDIF630erm_02807	CD630_25560	PTS system, fructose/mannitol-family IIAB component					ON		ON		Cellular Processes	Carbohydrate metabolism	Fructose and mannitol	Other	Cytoplasmic	CD2556	CD630_25560	SigD
CDIF630erm_02808	CD630_25570	Uncharacterized protein	-0.593782		-1.0498		0.178664		0.0582812		Miscellaneous	Miscellaneous	Uncharacterized proteins	Other	Cytoplasmic	CD2557	CD630_25570
CDIF630erm_02809	coaD	Phosphopantetheine adenylyltransferase (EC 2.7.7.3) (Dephospho-CoA pyrophosphorylase) (Pantetheine-phosphate adenylyltransferase) (PPAT)	-1.1328		-0.490534		-0.124823		-0.0733979		Cellular Processes	Cofactors	Pantothenate and coenzyme A	CD2557	Cytoplasmic	CD2558	CD630_25580
CDIF630erm_02810	CD630_25590	Rna methyltransferase, rsmd family	-0.125516				-0.662462				Cellular process	Protein synthesis	Ribosome biogenesis	Other	Cytoplasmic	CD2559	CD630_25590
CDIF630erm_02811	recG	ATP-dependent DNA helicase RecG (EC 3.6.4.12)			OFF		ON		1.99548		Cellular Processes	DNA and RNA metabolism	DNA metabolism	Other	Cytoplasmic	CD2560	CD630_25600
CDIF630erm_02812	yloV	Putative phosphatase	-0.314816		-0.0911623		-0.209606		0.885892		Cellular Processes	Cofactors	Phosphate	Other	Cytoplasmic	CD2561	CD630_25610
CDIF630erm_02813	yloU	Uncharacterized protein	0.24253		1.60495		-0.0508279		0.882939		Miscellaneous	Miscellaneous	Uncharacterized proteins	Other	Cytoplasmic	CD2562	CD630_25620
CDIF630erm_02814	rpmB	50S ribosomal protein L28	-1.86122		-0.613979		-1.37339		-3.18355		Cellular process	Protein synthesis	Ribosome biogenesis	Other	Cytoplasmic	CD2562A	CD630_25621	SigH; SigD
CDIF630erm_02817	CD630_25640	Transcriptional regulator, MerR family		*	OFF		ON		2.39452		Cellular Processes	Regulation and cell signaling	Transcriptional regulators	MerR family transcriptional regulators	Cytoplasmic	CD2564	CD630_25640
CDIF630erm_02824	CD630_25710	Two-component response regulator					ON		ON		Cellular Processes	Regulation and cell signaling	Uncharacterized two-component system	Other	Cytoplasmic	CD2571	CD630_25710
CDIF630erm_02825	CD630_25720	putative nitroreductase-like oxidoreductase	-0.440007		1.30305		-2.48635	*	-1.44945		Cellular Processes	Cofactors	Nitrogen and sulfur metabolism	281331	Cytoplasmic	CD2572	CD630_25720
CDIF630erm_02826	CD630_25730	putative phosphoglycolate phosphatase	-0.0251689		-1.20787		2.49188	*	0.699727		Cellular Processes	Cofactors	Nitrogen and sulfur metabolism	281331	Cytoplasmic	CD2573	CD630_25730
CDIF630erm_02827	thiN	Thiamine pyrophosphokinase (TPK) (Thiamine diphospho kinase) (EC 2.7.6.2)	OFF								Cellular Processes	Cofactors	Thiamin	Other	Cytoplasmic	CD2574	CD630_25740	SigB
CDIF630erm_02828	rpe1	Ribulose-phosphate 3-epimerase (EC 5.1.3.1)	-0.0385138		-0.0843006		-1.55402	*	-3.79128	*	Cellular Processes	Central energy metabolism	Pentose phosphate pathway	Other	Cytoplasmic	CD2575	CD630_25750
CDIF630erm_02829	rsgA	Small ribosomal subunit biogenesis GTPase RsgA (EC 3.6.1.-)	-1.24178		-1.96869		2.33098		1.53815		Cellular process	Protein synthesis	Ribosome biogenesis	Other	Cytoplasmic	CD2576	CD630_25760
CDIF630erm_02831	stk	Putative serine/threonine-protein kinase and phosphatase	-1.05967		-2.83443	*	1.57242	*	0.340346		Cell Envelope	Cell wall	Cell wall homeostasis	CD2574	CytoplasmicMembrane	CD2578	CD630_25780	SpoA
CDIF630erm_02833	rlmN	Probable dual-specificity RNA methyltransferase RlmN (EC 2.1.1.192) (23S rRNA (adenine(2503)-C(2))-methyltransferase) (23S rRNA m2A2503 methyltransferase) (Ribosomal RNA large subunit methyltransferase N) (tRNA (adenine(37)-C(2))-methyltransferase) (tRNA m2A37 methyltransferase)	OFF		-2.37516		2.00236		1.03187		Cellular process	Protein synthesis	Ribosome biogenesis	CD2574	Cytoplasmic	CD2580	CD630_25800	SpoA
CDIF630erm_02834	rsmB	Ribosomal RNA small subunit methyltransferase B (RRNA (Cytosine-C(5)-)-methyltransferase) (EC 2.1.1.-)	OFF		OFF	*	2.68129		2.82344		Cellular process	Protein synthesis	Ribosome biogenesis	CD2574	Cytoplasmic	CD2581	CD630_25810
CDIF630erm_02835	CD630_25820	Putative metal-dependent peptidase	-2.92882		-4.01431	*	0.154929		-1.20229		Cellular process	Protein folding and degradation	Peptidases	Other	CytoplasmicMembrane	CD2582	CD630_25820	ccpA; SpoA
CDIF630erm_02836	CD630_25830	polyprenyl synthetase-related protein		*	OFF		ON		1.16861		Cellular process	Protein synthesis	Uncharacterized proteins	CD2574	CytoplasmicMembrane	CD2583	CD630_25830	ccpA
CDIF630erm_02837	fmt	Methionyl-tRNA formyltransferase (EC 2.1.2.9)	-1.34788		-1.75894		1.25536		0.960069		Cellular process	Protein synthesis	Translation	CD2574	Cytoplasmic	CD2584	CD630_25840
CDIF630erm_02838	def2	Peptide deformylase (PDF) (EC 3.5.1.88) (Polypeptide deformylase)	-1.67867		-0.266413		-1.65006	*	-2.56601		Cellular process	Protein synthesis	Translation	CD2574	Cytoplasmic	CD2585	CD630_25850
CDIF630erm_02839	priA	Primosomal protein N' (EC 3.6.4.-) (ATP-dependent helicase PriA)					ON		ON		Cellular process	Protein synthesis	Translation	CD2574	Cytoplasmic	CD2586	CD630_25860
CDIF630erm_02840	coaBC	bifunctional phosphopantothenoylcysteine synthetase / decarboxylase	-0.870281		-2.39305		2.86725	*	1.38313	*	Cellular Processes	Cofactors	Pantothenate and coenzyme A	Other	Cytoplasmic	CD2587	CD630_25870
CDIF630erm_02841	rpoZ	DNA-directed RNA polymerase subunit omega (RNAP omega subunit) (EC 2.7.7.6) (RNA polymerase omega subunit) (Transcriptase subunit omega)	-0.305001		-0.402246		-0.237453		0.177813		Cellular Processes	DNA and RNA metabolism	Transcription	CD2574	Cytoplasmic	CD2587A	CD630_25871
CDIF630erm_02842	gmk	Guanylate kinase (EC 2.7.4.8) (GMP kinase)	-0.429331		-0.12432		-1.64238	*	-1.46818		Cellular Processes	DNA and RNA metabolism	Transcription	CD2574	Cytoplasmic	CD2588	CD630_25880
CDIF630erm_02843	CD630_25890	Uncharacterized protein	-1.8082		-1.37049		-3.27395		-3.8745		Miscellaneous	Miscellaneous	Uncharacterized proteins	Other	Cytoplasmic	CD2589	CD630_25890
CDIF630erm_02844	dapF	Diaminopimelate epimerase (DAP epimerase) (EC 5.1.1.7) (PLP-independent amino acid racemase)	-0.570852		-0.161675		-1.95682		-0.0897765		Cellular Processes	Amino acid metabolism	Amino acid metabolism	Other	Cytoplasmic	CD2590	CD630_25900
CDIF630erm_02845	ltaE	Low specificity L-threonine aldolase (EC 4.1.2.5)	1.05052		0.615892		-1.07837		-0.665396		Cellular Processes	Amino acid metabolism	Lysine, threonine, methionine and cysteine metabolism	Lysine, threonine, methionine and cysteine metabolism	Cytoplasmic	CD2591	CD630_25910
CDIF630erm_02846	yloA	uncharacterized protein YloA	-1.65464		-1.98633		-0.914494		1.06142	*	Cellular Processes	Stress Response and virulence	Virulence	Other	Cytoplasmic	CD2592	CD630_25920	SigB
CDIF630erm_02849	pyrR	Bifunctional protein PyrR [Includes: Pyrimidine operon regulatory protein; Uracil phosphoribosyltransferase (UPRTase) (EC 2.4.2.9)]	-1.01476		-0.711221		-0.182977		-0.160143		Cellular Processes	DNA and RNA metabolism	Nucleosides and nucleotide metabolism	Other	Cytoplasmic	CD2595	CD630_25950
CDIF630erm_02850	CD630_25960	Pseudouridine synthase (EC 5.4.99.-)									Cellular Processes	DNA and RNA metabolism	RNA Processing	Other	Cytoplasmic	CD2596	CD630_25960
CDIF630erm_02854	cstA	Carbon starvation protein, CstA	-1.1725		-3.25531	*	0.421884		-1.21087	*	Cellular Processes	Stress Response and virulence	Nutrient limitation	Other	CytoplasmicMembrane	CD2600	CD630_26000	Hfq; SigD; SigB
CDIF630erm_02855	CD630_26010	Two-component response regulator	-1.88291		-1.19147		1.88291		1.37415		Cellular Processes	Regulation and cell signaling	Uncharacterized two-component system	Other	Cytoplasmic	CD2601	CD630_26010
CDIF630erm_02862	trpS	Tryptophan--tRNA ligase (EC 6.1.1.2) (Tryptophanyl-tRNA synthetase) (TrpRS)	-0.504443		-0.168559		-2.96997		-3.76103		Cellular process	Protein synthesis	tRNA metabolism	Other	Cytoplasmic	CD2610	CD630_26100	ccpA
CDIF630erm_02863	mtnN	bifunctional 5*-methylthioadenosine / S-adenosylhomocysteine nucleosidase	0.08944		-0.0361917		0.0641591		1.13238		Cellular Processes	Amino acid metabolism	Amino acid metabolism	Other	Cytoplasmic	CD2611	CD630_26110
CDIF630erm_02865	CD630_26120	Putative amino acid permease	-0.499377		-1.79499	*	-0.0427804		-0.844968	*	Cellular Processes	Amino acid metabolism	Uptake of amino acids	Other	CytoplasmicMembrane	CD2612	CD630_26120	SigH; SpoA
CDIF630erm_02866	CD630_26130	Putative peptidase, M24 family (EC 3.4.11.9)	0.280333		1.25267		-2.36939		-2.49427		Cellular process	Protein folding and degradation	Peptidases	Other	Cytoplasmic	CD2613	CD630_26130	SigD; SpoA
CDIF630erm_02867	CD630_26140	Uncharacterized protein, DegV family	ON		1.89118						Cellular Processes	DNA and RNA metabolism	DNA metabolism	Other	Cytoplasmic	CD2614	CD630_26140
CDIF630erm_02868	CD630_26150	Transcriptional regulator, TetR family					ON		ON		Cellular Processes	Regulation and cell signaling	Transcriptional regulators	TetR family	Unknown	CD2615	CD630_26150
CDIF630erm_02871	ileS	Isoleucine--tRNA ligase (EC 6.1.1.5) (Isoleucyl-tRNA synthetase) (IleRS)	0.131882		0.10119		-1.26841		-0.810397		Cellular process	Protein synthesis	tRNA metabolism	Other	Cytoplasmic	CD2618	CD630_26180
CDIF630erm_02873	CD630_26190	Putative cell-division initiation protein DivIVA	-1.17614	*	-0.832421		-1.63286	*	-2.34572	*	Cellular Processes	Cell division and cell death	Cell division	CD2619	Cytoplasmic	CD2619	CD630_26190	SigH
CDIF630erm_02874	CD630_26200	Putative RNA-binding cell division protein					ON				Cellular Processes	Cell division and cell death	Cell division	CD2619	Cytoplasmic	CD2620	CD630_26200	SigH
CDIF630erm_02876	sepF	Cell division protein SepF	-0.564422		-0.27173		2.38332	*	0.565863		Cellular Processes	Cell division and cell death	Cell division	CD2619	Cytoplasmic	CD2622	CD630_26220	SigH
CDIF630erm_02877	CD630_26230	Pyridoxal phosphate homeostasis protein (PLP homeostasis protein)	-0.574237		-0.644525		-0.59971		0.0912874		Cellular Processes	Amino acid metabolism	Amino acid metabolism	Other	Cytoplasmic	CD2623	CD630_26230	SigH
CDIF630erm_02878	CD630_26240	putative membrane fusion protein	-0.936874		1.00598		OFF		OFF		Cellular Processes	Cell division and cell death	Cell division	CD2619	Cytoplasmic	CD2624	CD630_26240	SigH; ccpA
CDIF630erm_02880	CD630_26260	UPF0210 protein CD630_26260	-0.717565		-1.02205		-2.07963		-4.55		Miscellaneous	Miscellaneous	Uncharacterized proteins	281341	Cytoplasmic	CD2626	CD630_26260	CodY
CDIF630erm_02881	CD630_26270	UPF0237 protein CD630_26270	0.674687		1.80111		-0.496707		-0.626017		Miscellaneous	Miscellaneous	Uncharacterized proteins	281341	Cytoplasmic	CD2627	CD630_26270	ccpA; CodY
CDIF630erm_02883	spoIVA	Stage IV sporulation protein A (EC 3.6.1.3) (Coat morphogenetic protein SpoIVA)	1.92932		3.56339		-2.90731		OFF		Cellular Processes	Sporulation and germination	Sporulation and germination	Other	Cytoplasmic	CD2629	CD630_26290	SigH; SigF; SigE; Fur ; SpoA; SigB
CDIF630erm_02884	gpsA	Glycerol-3-phosphate dehydrogenase [NAD(P)+] (EC 1.1.1.94) (NAD(P)H-dependent glycerol-3-phosphate dehydrogenase)	-0.370683		1.1131		-1.23015		-0.884531		Cellular Processes	Fatty Acids	Phospholipid metabolism	CD2630	Cytoplasmic	CD2630	CD630_26300
CDIF630erm_02885	plsY	Glycerol-3-phosphate acyltransferase (Acyl-PO4 G3P acyltransferase) (Acyl-phosphate--glycerol-3-phosphate acyltransferase) (G3P acyltransferase) (GPAT) (EC 2.3.1.275) (Lysophosphatidic acid synthase) (LPA synthase)			OFF				-1.25102		Cellular Processes	Fatty Acids	Phospholipid metabolism	CD2630	CytoplasmicMembrane	CD2631	CD630_26310
CDIF630erm_02886	der	GTPase Der (GTP-binding protein EngA)	-0.328584		-1.51428		2.28945	*	1.41426	*	Cellular process	Protein synthesis	Ribosome biogenesis	Other	Cytoplasmic	CD2632	CD630_26320
CDIF630erm_02887	CD630_26330	Putative fes-containing cyanobacterial-specific oxidoreductase	OFF		OFF		2.14848		0.0585897		Miscellaneous	Miscellaneous	Uncharacterized proteins	Other	Cytoplasmic	CD2633	CD630_26330
CDIF630erm_02891	CD630_26370	Two-component sensor histidine kinase			OFF		ON		1.87327		Cellular Processes	Regulation and cell signaling	Uncharacterized two-component system	CD2634	CytoplasmicMembrane	CD2637	CD630_26370	SigF; SigE; SigB
CDIF630erm_02892	CD630_26380	Two-component response regulator			-0.463555		0.441774		1.86519		Cellular Processes	Regulation and cell signaling	Uncharacterized two-component system	CD2634	Cytoplasmic	CD2638	CD630_26380	SigF; SigE
CDIF630erm_02893	CD630_26390	Polyphenol oxidase	0.301659		-0.180204		0.124649		0.346987		Miscellaneous	Miscellaneous	Uncharacterized proteins	Other	Unknown	CD2639	CD630_26390	SigE; SigB
CDIF630erm_02894	nrdR	Transcriptional repressor NrdR	-0.36455		-0.457556		2.63662	*	1.27257	*	Cellular Processes	DNA and RNA metabolism	Nucleosides and nucleotide metabolism	Other	Cytoplasmic	CD2640	CD630_26400	SigF; SigE; SigB
CDIF630erm_02899	CD630_26450	ABC-type transport system, sugar-family extracellular solute-binding protein			OFF				-0.735478		Cellular Processes	Carbohydrate metabolism	Carbohydrate uptake	Other	CytoplasmicMembrane	CD2645	CD630_26450
CDIF630erm_02900	ftsZ	Cell division protein FtsZ	-0.48789		-0.549934		-0.356898		0.686724		Cellular Processes	Cell division and cell death	Cell division	Other	Cytoplasmic	CD2646	CD630_26460	SigH
CDIF630erm_02903	CD630_26490	Uncharacterized protein			-1.70808				OFF		Cellular Processes	Cell division and cell death	Cell division	Other	Unknown	CD2649	CD630_26490	SigH
CDIF630erm_02905	murG	UDP-N-acetylglucosamine--N-acetylmuramyl-(pentapeptide) pyrophosphoryl-undecaprenol N-acetylglucosamine transferase (EC 2.4.1.227) (Undecaprenyl-PP-MurNAc-pentapeptide-UDPGlcNAc GlcNAc transferase)	OFF	*	OFF	*	2.01093		1.78254		Cell Envelope	Cell wall	Cell wall biosynthesis	Mur	CytoplasmicMembrane	CD2651	CD630_26510	SigH; SpoA; SigB
CDIF630erm_02907	murD	UDP-N-acetylmuramoylalanine--D-glutamate ligase (EC 6.3.2.9) (D-glutamic acid-adding enzyme) (UDP-N-acetylmuramoyl-L-alanyl-D-glutamate synthetase)	-0.515524		-2.22144		1.84127		0.728988		Cell Envelope	Cell wall	Cell wall biosynthesis	Mur	Cytoplasmic	CD2653	CD630_26530	SigH; SigB
CDIF630erm_02909	murF	UDP-N-acetylmuramoyl-tripeptide--D-alanyl-D-alanine ligase (EC 6.3.2.10) (D-alanyl-D-alanine-adding enzyme)	-0.793124		-1.97374		1.44176		0.941669		Cell Envelope	Cell wall	Cell wall biosynthesis	Mur	Cytoplasmic	CD2655	CD630_26550	SigB
CDIF630erm_02910	spoVD	Stage V sporulation protein D (Sporulation-specific penicillin-binding protein)	-2.25746		1.04898				OFF		Cellular Processes	Sporulation and germination	Sporulation and germination	Other	CytoplasmicMembrane	CD2656	CD630_26560	SigH; SpoA; SigB
CDIF630erm_02912	rsmH	Ribosomal RNA small subunit methyltransferase H (EC 2.1.1.199) (16S rRNA m(4)C1402 methyltransferase) (rRNA (cytosine-N(4)-)-methyltransferase RsmH)	OFF		-2.62119		2.60473		1.91237		Cellular process	Protein synthesis	Ribosome biogenesis	Other	Cytoplasmic	CD2658	CD630_26580
CDIF630erm_02913	lgt	Phosphatidylglycerol--prolipoprotein diacylglyceryl transferase (EC 2.5.1.145)			OFF				OFF		Cell Envelope	Cell membrane	Cell membrane	Other	CytoplasmicMembrane	CD2659	CD630_26590	SigB
CDIF630erm_02914	CD630_26600	Putative peptidase, M16 family	-0.901894		0.657954		-1.23794		0.680815		Cellular process	Protein folding and degradation	Protein folding and degradation	281349	Cytoplasmic	CD2660	CD630_26600	SigB
CDIF630erm_02915	CD630_26610	Putative peptidase, M16 family	-0.907988		0.715673		-1.08984		0.945743		Cellular process	Protein folding and degradation	Protein folding and degradation	281349	Cytoplasmic	CD2661	CD630_26610	SigB
CDIF630erm_02916	ychF	Ribosome-binding ATPase YchF	-0.494534		-1.44888		2.42833	*	1.67191	*	Cellular process	Protein synthesis	Ribosome biogenesis	Other	Cytoplasmic	CD2662	CD630_26620
CDIF630erm_02917	CD630_26630	Phosphodiesterase	OFF		OFF	*	2.24266		2.28643		Cellular Processes	Regulation and cell signaling	C-di-GMP signaling	Other	CytoplasmicMembrane	CD2663	CD630_26630
CDIF630erm_02918	murE	UDP-N-acetylmuramoyl-L-alanyl-D-glutamate--2,6-diaminopimelate ligase (EC 6.3.2.13) (Meso-A2pm-adding enzyme) (Meso-diaminopimelate-adding enzyme) (UDP-MurNAc-L-Ala-D-Glu:meso-diaminopimelate ligase) (UDP-MurNAc-tripeptide synthetase) (UDP-N-acetylmuramyl-tripeptide synthetase)	-0.259256		-2.25061	*	2.78143	*	0.967793	*	Cell Envelope	Cell wall	Cell wall biosynthesis	Mur	Cytoplasmic	CD2664	CD630_26640	SigH; SpoA; SigB
CDIF630erm_02921	ptsG-BC	PTS system, glucose-specific IIBC component (EC 2.7.1.69)	-0.490874		-1.78163	*	0.639708		-0.790632	*	Cellular Processes	Carbohydrate metabolism	Glucose	Other	CytoplasmicMembrane	CD2667	CD630_26670	SigH; Hfq; SpoA; SigB
CDIF630erm_02922	CD630_26680	Transcription antiterminator, licT family	-0.0455842		-0.559738		2.53967	*	1.46933	*	Cellular Processes	Carbohydrate metabolism	Glucose	Other	Cytoplasmic	CD2668	CD630_26680	SigH; SigD; SpoA
CDIF630erm_02923	nhaK	sodium, potassium, lithium and rubidium / h(+) antiporter	-0.602327		-4.11434	*	0.772344		-1.43276	*	Cellular Processes	Cofactors	Cation transporters	Other	CytoplasmicMembrane	CD2669a	CD630_26691
CDIF630erm_02924	appF	ABC-type transport system, ATP-binding protein putative oligopeptide transport system	-0.661437		-0.413327		1.54683		0.465743		Cellular Processes	Amino acid metabolism	Uptake of amino acids	CD2669a	CytoplasmicMembrane	CD2670	CD630_26700	SigH
CDIF630erm_02925	appD	ABC-type transport system, ATP-binding protein putative oligopeptide transport system	0.0948734		-1.02603		1.75975	*	0.750758		Cellular Processes	Amino acid metabolism	Uptake of amino acids	CD2669a	CytoplasmicMembrane	CD2671	CD630_26710	SigH
CDIF630erm_02926	appA	ABC-type transport system, oligopeptide-family solute-binding protein	0.342328		-1.77602	*	1.10007		-0.559337		Cellular Processes	Amino acid metabolism	Uptake of amino acids	CD2672	Cellwall	CD2672	CD630_26720	SigH
CDIF630erm_02927	appB	ABC-type transport system, oligopeptide-family permease protein	-1.48352		-1.98434	*	0.0958709		-2.43118	*	Cellular Processes	Amino acid metabolism	Uptake of amino acids	CD2672	CytoplasmicMembrane	CD2673	CD630_26730	SigH; Hfq
CDIF630erm_02928	appC	ABC-type transport system, oligopeptide-family permease protein	ON	*	-2.67252	*			-0.643785		Cellular Processes	Amino acid metabolism	Uptake of amino acids	CD2672	CytoplasmicMembrane	CD2674	CD630_26740	SigH
CDIF630erm_02929	CD630_26750	Transcriptional regulator, LysR family	0.319356		0.3656		1.42166		1.38249	*	Cellular Processes	Regulation and cell signaling	Transcriptional regulators	LysR family transcriptional regulators	Cytoplasmic	CD2675	CD630_26750
CDIF630erm_02936	pfo	Pyruvate-flavodoxin oxidoreductase (EC 1.2.7.-) // pyruvate synthase	0.411877		0.427678		-1.06537		0.0473924		Cellular Processes	Central energy metabolism	Conversion of pyruvate to acetyl-CoA	Other	Cytoplasmic	CD2682	CD630_26820	Hfq
CDIF630erm_02937	CD630_26830	Phosphate propanoyltransferase (EC 2.3.1.222)	-0.0642321		0.834901		-1.39797	*	-1.45919		Cellular Processes	Carbohydrate metabolism	Ethanolamine utilization	Other	Cytoplasmic	CD2683	CD630_26830	SigH; ccpA
CDIF630erm_02938	isf	iron-sulfur flavoprotein			-1.45929		1.36785		1.04762		Cellular Processes	Central energy metabolism	Electron transport	Other	Cytoplasmic	CD2684	CD630_26840
CDIF630erm_02939	CD630_26850	Putative sporulation stage II, protein E	-1.93833		-1.39152		-1.31009		0.457122		Cellular Processes	Sporulation and germination	Sporulation and germination	Other	Cytoplasmic	CD2685	CD630_26850	SigF
CDIF630erm_02943	sspA	Small, acid-soluble spore protein alpha	3.06723	*	3.08779	*	-1.03994		-2.47007		Cellular Processes	Sporulation and germination	Sporulation and germination	Other	Cytoplasmic	CD2688	CD630_26880	SigH; Hfq; SigF; SigG; SigB
CDIF630erm_02944	CD630_26890	Putative lipoprotein	OFF		OFF		3.83911		0.528462		Cell Envelope	Cell membrane	Cell membrane	Other	Unknown	CD2689	CD630_26890
CDIF630erm_02946	hpt	Hypoxanthine phosphoribosyltransferase (EC 2.4.2.8)	-0.173271		-0.0420286		-1.01615		-0.344183		Cellular Processes	DNA and RNA metabolism	Nucleosides and nucleotide metabolism	Other	Cytoplasmic	CD2691	CD630_26910	SigH
CDIF630erm_02947	cobD1	threonine-phosphate decarboxylase	-2.02651		-2.51717		1.42517		1.52225	*	Cellular Processes	Cofactors	Heme, porphyrin and cobalamin	Other	Cytoplasmic	CD2692	CD630_26920
CDIF630erm_02948	sstT	putative serine / threonine transporter SstT	-0.518319		-0.622766		-1.22322		OFF		Cellular Processes	Carbohydrate metabolism	Carbohydrate uptake	Other	CytoplasmicMembrane	CD2693	CD630_26930	SigH; ccpA
CDIF630erm_02950	asnA	Aspartate--ammonia ligase (EC 6.3.1.1) (Asparagine synthetase A)	0.418777		-0.186862		1.11069		0.827811		Cellular Processes	Amino acid metabolism	Amino acid metabolism	Other	Cytoplasmic	CD2695	CD630_26950
CDIF630erm_02952	patB2	putative cystathionine beta-lyase	0.692431		0.654075		1.51184	*	1.50707	*	Cellular Processes	Cofactors	Sulfur Metabolism	Other	Cytoplasmic	CD2696	CD630_26960	ccpA
CDIF630erm_02956	CD630_27000	Transcriptional regulator, sigma-54 dependent					ON		ON		Cellular Processes	Stress Response and virulence	RpoN dependent stress reponse	Other	Cytoplasmic	CD2700	CD630_27000	ccpA; RpoN (EBP)
CDIF630erm_02957	CD630_27010	Putative lipoprotein	-0.965185		-2.18023	*	0.755207		-0.699595	*	Cell Envelope	Cell membrane	Lipoproteins	Lipoproteins	Unknown	CD2701	CD630_27010
CDIF630erm_02959	CD630_27030	Putative pentapeptide repeat-containing protein	-0.155598		0.783882		1.20862	*	2.2481	*	Miscellaneous	Miscellaneous	Uncharacterized proteins	Other	Cytoplasmic	CD2703	CD630_27030	SigB
CDIF630erm_02962	CD630_27050	putative adenosine-derivate deaminase	0.221012		0.0122786		-1.7058		-3.23213		Cellular Processes	DNA and RNA metabolism	Nucleosides and nucleotide metabolism	Other	Cytoplasmic	CD2705	CD630_27050
CDIF630erm_02963	CD630_27060	Uncharacterized protein	OFF		-2.36368		0.118856		1.27217		Miscellaneous	Miscellaneous	Uncharacterized proteins	Other	Cytoplasmic	CD2706	CD630_27060
CDIF630erm_02968	CD630_27110	Transcriptional regulator, LysR family	ON		-0.726541				0.787569		Cellular Processes	Regulation and cell signaling	Transcriptional regulators	LysR family transcriptional regulators	Cytoplasmic	CD2711	CD630_27110	SpoA
CDIF630erm_02970	cwp22	Putative cell wall protein cwp22	-1.1041	*	-0.28148		-2.55111	*	-4.11372		Cell Envelope	Cell wall	SlpA and paralogues	Other	Cellwall	CD2713	CD630_27130	ccpA
CDIF630erm_02971	galE	UDP-glucose 4-epimerase (EC 5.1.3.2)	-0.322517		-0.660074		1.03254		0.954402		Cell Envelope	Cell wall	Teichoic acid metabolism	GtaB	Unknown	CD2714	CD630_27140
CDIF630erm_02972	gtaB	UTP--glucose-1-phosphate uridylyltransferase (EC 2.7.7.9) (UDP-glucose pyrophosphorylase)	-0.118578		-1.28351		2.40013	*	1.11013	*	Cell Envelope	Cell wall	Teichoic acid metabolism	GtaB	Cytoplasmic	CD2715	CD630_27150
CDIF630erm_02974	CD630_27160	Uncharacterized protein	-0.88762		-1.09117		1.43991	*	1.19825	*	Miscellaneous	Miscellaneous	Uncharacterized proteins	Other	Cytoplasmic	CD2716	CD630_27160
CDIF630erm_02975	CD630_27170	Putative sporulation protein	-0.84602		-2.03341	*	-0.491998		-1.66485	*	Cellular Processes	Sporulation and germination	Sporulation and germination	Other	Cytoplasmic	CD2717	CD630_27170	SigB
CDIF630erm_02977	CD630_27180	Putative peptidase C60B, sortase B	OFF		OFF				OFF		Cellular process	Protein folding and degradation	Peptidases	Other	Unknown	CD2718	CD630_27180
CDIF630erm_02981	CD630_27190	putative peptidoglycan-N-acetylmuramic acid deacetylase	-0.748751		-1.73008	*	0.151667		-0.648967		Cellular Processes	Sporulation and germination	Sporulation and germination	Other	Cytoplasmic	CD2719	CD630_27190
CDIF630erm_02984	CD630_27220	Two-component response regulator	OFF		OFF		1.55022		1.83037		Cellular Processes	Regulation and cell signaling	Uncharacterized two-component system	Other	Cytoplasmic	CD2722	CD630_27220
CDIF630erm_02986	CD630_27240	Putative polysaccharide deacetylase	OFF	*	-2.68741		-0.572453	*	-1.69521		Cellular Processes	Carbohydrate metabolism	Carbohydrate utilization	Other	Cytoplasmic	CD2724	CD630_27240	ccpA
CDIF630erm_02988	glyA	Serine hydroxymethyltransferase (SHMT) (Serine methylase) (EC 2.1.2.1)	0.0599196		-0.214934		0.984091		1.31583	*	Cellular Processes	CO2 fixation	Tetrahydrofolate interconversion	Other	Cytoplasmic	CD2726	CD630_27260	CodY
CDIF630erm_02989	CD630_27270	Putative membrane protein			OFF				OFF		Cell Envelope	Cell membrane	Cell membrane	Other	CytoplasmicMembrane	CD2727	CD630_27270
CDIF630erm_02991	CD630_27290	Putative regulator of the sigma(E) factor	OFF		OFF		1.09643				Cellular Processes	Regulation and cell signaling	Transcriptional regulators	Other	Cytoplasmic	CD2729	CD630_27290
CDIF630erm_02998	cwp14	Putative cell wall-binding protein cwp14	-0.0511178		2.1133		-2.3537		-1.62415		Cell Envelope	Cell wall	SlpA and paralogues	Other	Cellwall	CD2735	CD630_27350
CDIF630erm_02999	CD630_27360	Transcriptional regulator, LysR family	-1.38974		-1.94732		1.20997		0.908239		Cellular Processes	Regulation and cell signaling	Transcriptional regulators	LysR family transcriptional regulators	Cytoplasmic	CD2736	CD630_27360
CDIF630erm_03000	CD630_27370	putative beta-ureidopropionase	0.126296		1.76689		-2.91746	*	-2.98127		Cellular Processes	DNA and RNA metabolism	Nucleosides and nucleotide metabolism	281365	Cytoplasmic	CD2737	CD630_27370	SigH; Fur
CDIF630erm_03001	CD630_27380	Putative cytosine permease	ON		ON						Cellular Processes	DNA and RNA metabolism	Nucleosides and nucleotide metabolism	281365	CytoplasmicMembrane	CD2738	CD630_27380	SigH; Fur; SigB
CDIF630erm_03002	aspS	Aspartate--tRNA ligase (EC 6.1.1.12) (Aspartyl-tRNA synthetase) (AspRS)	-0.81672		-0.873826		0.642911		1.25218	*	Cellular process	Protein synthesis	tRNA metabolism	CD2739	Cytoplasmic	CD2739	CD630_27390
CDIF630erm_03003	hisS	Histidine--tRNA ligase (EC 6.1.1.21) (Histidyl-tRNA synthetase) (HisRS)	-0.446306		-0.821313		-2.03744		-4.29316		Cellular process	Protein synthesis	tRNA metabolism	CD2739	Cytoplasmic	CD2740	CD630_27400
CDIF630erm_03004	hemZ	Coproporphyrinogen III oxidase (EC 1.3.99.22)	OFF		OFF		3.54952		1.4773		Cellular Processes	Cofactors	Heme, porphyrin and cobalamin	Other	Cytoplasmic	CD2741	CD630_27410
CDIF630erm_03005	CD630_27420	Putative hydrolase beta-lactamase-like	-0.745103		0.073847		-2.22558	*	-2.34087		Cell Envelope	Cell wall	Cell wall biosynthesis	Other	Cytoplasmic	CD2742	CD630_27420
CDIF630erm_03006	dtd	D-tyrosyl-tRNA(Tyr) deacylase	-0.493781		-0.344346		-0.759867		0.360486		Cellular process	Protein synthesis	tRNA metabolism	CD2739	Unknown	CD2743	CD630_27430
CDIF630erm_03007	relA	GTP pyrophosphokinase (RelA/SpoT) (EC 2.7.6.5)	-1.70455		-1.50524		-0.737841		1.0714		Cellular Processes	Regulation and cell signaling	Stringent response	Other	Cytoplasmic	CD2744	CD630_27440
CDIF630erm_03008	apt	Adenine phosphoribosyltransferase (APRT) (EC 2.4.2.7)	-0.0357233		-0.000638674		0.648602		1.10315		Cellular Processes	DNA and RNA metabolism	Nucleosides and nucleotide metabolism	Other	Cytoplasmic	CD2745	CD630_27450
CDIF630erm_03009	recJ	Single-stranded-DNA-specific exonuclease (EC 3.1.-.-)	-0.265167		-1.41124		1.66589		0.276875		Cellular Processes	DNA and RNA metabolism	DNA repair	Other	Cytoplasmic	CD2746	CD630_27460
CDIF630erm_03010	ubiB	Putative ubiquinone biosynthesis protein	OFF		OFF		1.73854		-0.93769		Cellular Processes	Cofactors	Menaquinone and ubiquinone	Other	CytoplasmicMembrane	CD2747	CD630_27470
CDIF630erm_03011	CD630_27480	Putative acyltransferase	-0.334564		0.420647		-1.54089	*	-1.62981		Miscellaneous	Miscellaneous	Uncharacterized proteins	Other	Unknown	CD2748	CD630_27480
CDIF630erm_03012	CD630_27490	Putative radical SAM-family protein	-1.03889		-2.88276		2.60985		1.07322		Miscellaneous	Miscellaneous	Uncharacterized proteins	Other	Cytoplasmic	CD2749	CD630_27490
CDIF630erm_03014	CD630_27510	Uncharacterized protein	-1.10231		-1.42278	*	0.354502		1.03103	*	Miscellaneous	Miscellaneous	Uncharacterized proteins	Other	Cytoplasmic	CD2751	CD630_27510
CDIF630erm_03017	CD630_27540	Putative diguanylate kinase signaling protein (EC 2.7.7.65)									Cellular Processes	Regulation and cell signaling	C-di-GMP signaling	Other	CytoplasmicMembrane	CD2754	CD630_27540
CDIF630erm_03018	ptsI	Phosphoenolpyruvate-protein phosphotransferase (EC 2.7.3.9) (Phosphotransferase system, enzyme I)	0.0178242		0.177456		-1.9869		-1.74483		Cellular Processes	Carbohydrate metabolism	Carbohydrate uptake	Other	Cytoplasmic	CD2755	CD630_27550	SigH; SpoA
CDIF630erm_03019	ptsH	PTS system, HPr protein	0.15747		0.982298		-1.25984		0.293202		Cellular Processes	Carbohydrate metabolism	Carbohydrate uptake	Other	Cytoplasmic	CD2756	CD630_27560	SigH; SigB
CDIF630erm_03020	CD630_27570	Putative phospholipase			0.217621		ON		1.33336		Cellular Processes	Fatty Acids	Degradation of fatty acids	Other	Cytoplasmic	CD2757	CD630_27570	SpoA
CDIF630erm_03021	CD630_27580	Putative N6 adenine-specific DNA methyltransferase, N12 class (EC 2.1.1.72)			OFF		ON		2.02713		Cellular Processes	DNA and RNA metabolism	Nucleosides and nucleotide metabolism	Other	Cytoplasmic	CD2758	CD630_27580
CDIF630erm_03022	CD630_27590	Transcriptional regulator, Rrf2 family	OFF	*	OFF		2.60978		0.699048		Cellular Processes	Regulation and cell signaling	Transcriptional regulators	Other	Cytoplasmic	CD2759	CD630_27590
CDIF630erm_03026	CD630_27630	Putative lipoprotein			OFF		ON		OFF		Cell Envelope	Cell membrane	Lipoproteins	Lipoproteins	Cytoplasmic	CD2763	CD630_27630
CDIF630erm_03027	ybiV	putative sugar phosphatase	OFF	*	-4.14475	*	1.84803		0.0741819		Cellular Processes	Cofactors	Phosphate	Other	Cytoplasmic	CD2764	CD630_27640	ccpA
CDIF630erm_03028	CD630_27650	Transcriptional regulator, LytR family		*	0.872652				OFF		Cellular Processes	Regulation and cell signaling	Transcriptional regulators	LytR family transcriptional regulators	CytoplasmicMembrane	CD2765	CD630_27650	SpoA
CDIF630erm_03029	CD630_27660	Transcriptional regulator, LytR family	OFF				-1.33539				Cellular Processes	Regulation and cell signaling	Transcriptional regulators	LytR family transcriptional regulators	CytoplasmicMembrane	CD2766	CD630_27660
CDIF630erm_03030	cwp19	Cell surface protein cwp19	-0.986834		-0.0875601		-2.71445	*	-4.68354		Cell Envelope	Cell wall	SlpA and paralogues	Other	Cellwall	CD2767	CD630_27670	Hfq; SigD; SpoA; SigB
CDIF630erm_03031	CD630_27680	Putative cell-wall hydrolase	1.14438		0.611072		OFF		OFF		Cell Envelope	Cell wall	Peptidoglycan turnover	Other	Extracellular	CD2768	CD630_27680
CDIF630erm_03032	capD	putative capsular polysaccharide biosynthesis protein	OFF		OFF		-0.179898		2.37926		Cell Envelope	Cell wall	Cell surface polysaccharides and lipopolysaccharides	CD2769	CytoplasmicMembrane	CD2769	CD630_27690
CDIF630erm_03033	CD630_27700	Putative glycosyl transferase, group 1	-1.25529		-2.04419		1.32859		1.55199	*	Cell Envelope	Cell wall	Cell surface polysaccharides and lipopolysaccharides	CD2769	Cytoplasmic	CD2770	CD630_27700
CDIF630erm_03034	rkpK	UDP-glucose 6-dehydrogenase (EC 1.1.1.22)	-0.691316		-2.14752		2.14085		0.888992		Cell Envelope	Cell wall	Cell surface polysaccharides and lipopolysaccharides	CD2769	Cytoplasmic	CD2771	CD630_27710
CDIF630erm_03035	tuaG1	Putative glycosyl transferase, family 2 (EC 2.4.1.-)	-1.20408		-2.0378		1.21624		1.4536	*	Cell Envelope	Cell wall	Cell surface polysaccharides and lipopolysaccharides	CD2769	CytoplasmicMembrane	CD2772	CD630_27720
CDIF630erm_03036	tuaG2	Putative glycosyl transferase, family 2	OFF		OFF		0.763478		0.335999		Cell Envelope	Cell wall	Cell surface polysaccharides and lipopolysaccharides	CD2769	Cytoplasmic	CD2773	CD630_27730
CDIF630erm_03037	CD630_27740	Putative glycosyl transferase, family 2 (EC 2.4.1.-)	OFF		OFF		1.67547		0.0246619		Cell Envelope	Cell wall	Cell surface polysaccharides and lipopolysaccharides	CD2769	Cytoplasmic	CD2774	CD630_27740
CDIF630erm_03038	CD630_27750	putative CDP-glycerol / ribitol transferase	-2.18545		-2.58195		0.754196		0.136539		Cell Envelope	Cell wall	Cell surface polysaccharides and lipopolysaccharides	CD2769	CytoplasmicMembrane	CD2775	CD630_27750
CDIF630erm_03039	CD630_27760	Putative glycosyl transferase, family 2							0.386481		Cell Envelope	Cell wall	Cell surface polysaccharides and lipopolysaccharides	CD2769	Cytoplasmic	CD2776	CD630_27760
CDIF630erm_03040	CD630_27770	Putative membrane protein	OFF		OFF		-1.37514		OFF		Cell Envelope	Cell wall	Cell surface polysaccharides and lipopolysaccharides	CD2769	CytoplasmicMembrane	CD2777	CD630_27770
CDIF630erm_03041	CD630_27780	Putative glycosyl transferase	-1.62033		-1.57012		0.866361		1.16815	*	Cell Envelope	Cell wall	Cell surface polysaccharides and lipopolysaccharides	CD2769	Cytoplasmic	CD2778	CD630_27780
CDIF630erm_03042	manC	Mannose-1-phosphate guanylyltransferase (EC 2.7.7.22)	0.648235		-1.1263		1.95199		2.07151	*	Cell Envelope	Cell wall	Cell surface polysaccharides and lipopolysaccharides	CD2769	Cytoplasmic	CD2779	CD630_27790
CDIF630erm_03043	pgmA	Alpha-phosphoglucomutase (EC 5.4.2.2)	-0.44576		-1.05557		-0.456425		0.139307		Cell Envelope	Cell wall	Cell surface polysaccharides and lipopolysaccharides	CD2769	Cytoplasmic	CD2780	CD630_27800
CDIF630erm_03044	mviN	transmembrane virulence factor / flippase			OFF				OFF		Cell Envelope	Cell wall	Cell surface polysaccharides and lipopolysaccharides	CD2769	CytoplasmicMembrane	CD2781	CD630_27810	SigF; SigE
CDIF630erm_03045	cwp7	Cell wall binding protein cwp7	-2.69256		-2.97722	*	-0.269444		-1.97298	*	Cell Envelope	Cell wall	SlpA and paralogues	Other	Cellwall	CD2782	CD630_27820
CDIF630erm_03046	CD630_27830	putative UDP-N-acetylgalactosamine-undecaprenyl-phosphate N-acetylgalactosaminephosphotransferase	OFF		-4.14571		1.00674		-1.53422		Cell Envelope	Cell wall	Cell surface polysaccharides and lipopolysaccharides	CD2769	CytoplasmicMembrane	CD2783	CD630_27830	ccpA; SigB
CDIF630erm_03047	cwp6	Putative N-acetylmuramoyl-L-alanine amidase,autolysin cwp6 (EC 3.5.1.28)	-0.0727199		-0.836666		-1.49956		-2.40311	*	Cell Envelope	Cell wall	SlpA and paralogues	Other	Cellwall	CD2784	CD630_27840	SigH; SigB
CDIF630erm_03049	cwp5	Putative cell surface protein cwp5	-1.18736		1.28437		-2.70363		OFF		Cell Envelope	Cell wall	SlpA and paralogues	Other	Cellwall	CD2786	CD630_27860
CDIF630erm_03050	cwp84	Cell surface protein cwp84 (EC 3.4.22.15)	-1.02512		-0.146989		-2.72363	*	-5.01941		Cell Envelope	Cell wall	SlpA and paralogues	Other	Cellwall	CD2787	CD630_27870
CDIF630erm_03052	cwp66	Cell surface protein cwp66	0.0390599		2.72157		-2.6972	*	0.0114365		Cell Envelope	Cell wall	SlpA and paralogues	Other	Cellwall	CD2789	CD630_27890	SigH; SigD
CDIF630erm_03053	CD630_27900	Putative LmbE-like deacetylase	ON		-0.0775007				OFF		Miscellaneous	Miscellaneous	Uncharacterized proteins	Other	Cytoplasmic	CD2790	CD630_27900	SigH; SigB
CDIF630erm_03054	cwp2	Cell wall binding protein cwp2	-0.227934		0.185198		-2.14177	*	-1.39034		Cell Envelope	Cell wall	SlpA and paralogues	Other	Cellwall	CD2791	CD630_27910	ccpA; SigB
CDIF630erm_03055	secA2	Protein translocase subunit SecA 2	-0.924865		-1.05486		-0.067243		1.34737	*	Cellular process	Protein Metabolism	Sec secretion	Other	Cytoplasmic	CD2792	CD630_27920
CDIF630erm_03056	slpA	Precursor of the S-layer proteins	-0.0593096		0.495252		-1.48425	*	-3.32343	*	Cell Envelope	Cell wall	SlpA and paralogues	Other	Cellwall	CD2793	CD630_27930	SigH; SigB
CDIF630erm_03057	cwp12	Cell wall binding protein cwp12	-0.286909		-0.846073		-3.06396	*	OFF		Cell Envelope	Cell wall	SlpA and paralogues	Other	Cellwall	CD2794	CD630_27940	ccpA
CDIF630erm_03058	cwp11	Cell wall binding protein cwp11	0.747796		-2.45638		OFF		OFF		Cell Envelope	Cell wall	SlpA and paralogues	Other	Cellwall	CD2795	CD630_27950	ccpA; c-di-GMP
CDIF630erm_03059	cwp10	Cell surface protein cwp10	-1.84677				OFF				Cell Envelope	Cell wall	SlpA and paralogues	Other	Cellwall	CD2796	CD630_27960	SpoA; c-di-GMP
CDIF630erm_03060	CD630_27970	Putative calcium-binding adhesion protein	0.403101		OFF		OFF		OFF		Cellular Processes	Cofactors	Cation transporters	Other	Unknown	CD2797	CD630_27970	SpoA; c-di-GMP
CDIF630erm_03062	cwp9	Cell wall binding protein cwp9	1.2368		0.591699		OFF		OFF		Cell Envelope	Cell wall	SlpA and paralogues	Other	Cellwall	CD2798	CD630_27980
CDIF630erm_03066	CD630_28010	Preprotein translocase, yajc subunit	-1.4527		-1.23512	*	0.63996		-0.980117		Cellular process	Protein Metabolism	Sec secretion	Other	CytoplasmicMembrane	CD2801	CD630_28010	SigH; ccpA
CDIF630erm_03067	tgt	Queuine tRNA-ribosyltransferase (EC 2.4.2.29) (Guanine insertion enzyme) (tRNA-guanine transglycosylase)			1.23414		1.18606		1.44722		Cellular Processes	DNA and RNA metabolism	RNA Processing	CD2800	Cytoplasmic	CD2802	CD630_28020	SigB
CDIF630erm_03069	queA	S-adenosylmethionine:tRNA ribosyltransferase-isomerase (EC 2.4.99.17) (Queuosine biosynthesis protein QueA)			OFF		2.50565		1.82801		Cellular Processes	DNA and RNA metabolism	RNA Processing	CD2800	Cytoplasmic	CD2804	CD630_28040	SigB
CDIF630erm_03070	ruvB	Holliday junction ATP-dependent DNA helicase RuvB (EC 3.6.4.12)	-2.20876		-1.78395		0.77198		1.76939	*	Cellular Processes	DNA and RNA metabolism	DNA repair	CD2805	Cytoplasmic	CD2805	CD630_28050
CDIF630erm_03072	ruvC	Crossover junction endodeoxyribonuclease RuvC (EC 3.1.22.4) (Holliday junction nuclease RuvC) (Holliday junction resolvase RuvC)					ON		ON		Cellular Processes	DNA and RNA metabolism	DNA repair	CD2805	Cytoplasmic	CD2807	CD630_28070
CDIF630erm_03073	CD630_28080	Uncharacterized protein	-0.932755				OFF				Cellular Processes	DNA and RNA metabolism	DNA repair	Other	Unknown	CD2808	CD630_28080	SigH; SigF; SigG; SigB
CDIF630erm_03079	CD630_28140	Transcriptional regulator, GntR family	-0.458286		0.636324		0.562269		1.35458		Cellular Processes	Regulation and cell signaling	Transcriptional regulators	GntR family transcriptional regulators	Cytoplasmic	CD2814	CD630_28140
CDIF630erm_03080	CD630_28150	Uncharacterized protein	-0.549451		-0.44528		2.56828	*	0.672323		Miscellaneous	Miscellaneous	Uncharacterized proteins	Other	Cytoplasmic	CD2815	CD630_28150	SigH
CDIF630erm_03082	CD630_28170	ABC-type transport system, multidrug-family ATP-binding/permease protein (EC 3.6.3.-)	0.362745		1.00865		-1.6389		-0.149785		Cellular Processes	Stress Response and virulence	Multi-drug transport	281377	CytoplasmicMembrane	CD2817	CD630_28170	Hfq
CDIF630erm_03083	CD630_28180	ABC-type transport system, multidrug-family ATP-binding/permease protein (EC 3.6.3.-)	-2.31492		-2.20237	*	0.192349		-0.3222		Cellular Processes	Stress Response and virulence	Multi-drug transport	281377	CytoplasmicMembrane	CD2818	CD630_28180
CDIF630erm_03084	CD630_28190	Putative amino acid racemase	1.06783		0.929402		0.224574		0.202129		Cellular Processes	Amino acid metabolism	Amino acid metabolism	Other	Cytoplasmic	CD2819	CD630_28190	SigH; CodY; SigB
CDIF630erm_03085	CD630_28200	Putative membrane protein			ON						Cell Envelope	Cell wall	Cell wall biosynthesis	CD2820	CytoplasmicMembrane	CD2820	CD630_28200	CodY; Fur
CDIF630erm_03086	CD630_28210	Putative membrane protein			0.285417				OFF		Cell Envelope	Cell wall	Cell wall biosynthesis	CD2820	CytoplasmicMembrane	CD2821	CD630_28210	CodY; Fur
CDIF630erm_03087	CD630_28220	Putative glutamate carboxypeptidase, M20 family (EC 3.4.17.11)	0.892487		2.16142	*	OFF		-1.73675		Cell Envelope	Cell wall	Cell wall biosynthesis	CD2820	Cytoplasmic	CD2822	CD630_28220	CodY; Fur
CDIF630erm_03088	CD630_28230	Uncharacterized protein	-1.43505		-2.31826		1.07382		0.873127		Miscellaneous	Miscellaneous	Uncharacterized proteins	Other	Unknown	CD2823	CD630_28230
CDIF630erm_03089	CD630_28250	Putative flavodoxin	OFF		-0.728367		-0.402569		-0.453305		Cellular Processes	Stress Response and virulence	Oxidative stress	CD2825	Cytoplasmic	CD2825	CD630_28250
CDIF630erm_03090	CD630_28260	Putative oxidoreductase (Fad-binding domain)	OFF		-0.199637		2.93054		1.55631		Cellular Processes	Stress Response and virulence	Oxidative stress	CD2825	Cytoplasmic	CD2826	CD630_28260
CDIF630erm_03091	CD630_28270	Transcriptional regulator, MarR family			OFF		1.69905		1.04233		Cellular Processes	Regulation and cell signaling	Transcriptional regulators	MarR family transcriptional regulators	Cytoplasmic	CD2827	CD630_28270	ccpA
CDIF630erm_03092	patA	putative N-acetyl-LL-diaminopimelate aminotransferase	1.08158		1.81432	*	-0.209674		0.704495		Cellular Processes	Amino acid metabolism	Lysine, threonine, methionine and cysteine metabolism	Lysine, threonine, methionine and cysteine metabolism	Cytoplasmic	CD2828	CD630_28280	CodY
CDIF630erm_03094	zmp1	Pro-Pro endopeptidase (PPEP-1) (EC 3.4.24.89) (Zinc metalloprotease Zmp1)	1.01499		-2.25138		OFF		OFF		Cell Envelope	Adhesion and motility	Type IV pilus	Other	Unknown	CD2830	CD630_28300	SpoA; c-di-GMP; SigB
CDIF630erm_03098	CD630_28320	Putative cation efflux protein					ON				Cellular Processes	Cofactors	Cation transporters	Other	CytoplasmicMembrane	CD2832	CD630_28320
CDIF630erm_03107	serS1A	Serine--tRNA ligase (EC 6.1.1.11) (Seryl-tRNA synthetase) (SerRS) (Seryl-tRNA(Ser/Sec) synthetase)	0.194418		-0.172692		-0.0815725		-0.0801645		Cellular process	Protein synthesis	tRNA metabolism	Other	Cytoplasmic	CD2840	CD630_28400
CDIF630erm_03108	CD630_28410	Putative amidohydrolase	OFF		OFF		OFF		-2.27835		Cellular Processes	Cofactors	Nitrogen and sulfur metabolism	Other	Cytoplasmic	CD2841	CD630_28410	SigD; SigF; SigG; c-di-GMP; SigB
CDIF630erm_03109	nit	bifunctional nitrilase / nitrile hydratase	-0.0917275		0.981843		-1.62298		-0.608871		Cellular Processes	Cofactors	Nitrogen and sulfur metabolism	Other	Cytoplasmic	CD2842	CD630_28420
CDIF630erm_03110	CD630_28430	Putative zinc-binding dehydrogenase (EC 1.6.5.5)	-0.695274		-0.661175		1.15927		1.32253		Cellular Processes	Cofactors	Sulfur Metabolism	Other	Unknown	CD2843	CD630_28430
CDIF630erm_03111	CD630_28440	Transcriptional regulator, MarR family					ON				Cellular Processes	Regulation and cell signaling	Transcriptional regulators	MarR family transcriptional regulators	Unknown	CD2844	CD630_28440
CDIF630erm_03112	rbr4	Rubrerythrin	-1.14207		1.78367		OFF		OFF		Cellular Processes	Stress Response and virulence	Oxidative stress	Other	Cytoplasmic	CD2845	CD630_28450	SigH; SigF; SigG; SigB
CDIF630erm_03113	CD630_28460	Uncharacterized protein	-1.46556		-2.06392		1.59706		0.141342		Miscellaneous	Miscellaneous	Uncharacterized proteins	Other	Cytoplasmic	CD2846	CD630_28460	c-di-GMP
CDIF630erm_03114	CD630_28470	putative bactofilin	-0.614347		-0.219309		-1.82957		OFF		Cell Envelope	Cell structure proteins	Cell structure proteins	CD2846	Cytoplasmic	CD2847	CD630_28470	c-di-GMP
CDIF630erm_03115	CD630_28480	putative bactofilin	-0.520057		-1.78538		1.27276		1.11738		Cell Envelope	Cell structure proteins	Cell structure proteins	CD2846	Unknown	CD2848	CD630_28480	c-di-GMP
CDIF630erm_03117	CD630_28500	Transcriptional regulator, DeoR family	0.60918		ON		0.503917		ON		Cellular Processes	Regulation and cell signaling	Transcriptional regulators	DeoR family transcriptional regulators	Cytoplasmic	CD2850	CD630_28500
CDIF630erm_03118	dltC	D-alanine--poly(phosphoribitol) ligase subunit 2	1.00072		1.27433		1.60206		0.703915		Cell Envelope	Cell wall	Teichoic acid metabolism	CD2851	Cytoplasmic	CD2851	CD630_28510
CDIF630erm_03120	dltA	D-alanine--poly(phosphoribitol) ligase subunit 1	-0.53842		-1.53118		1.33251		1.24706		Cell Envelope	Cell wall	Teichoic acid metabolism	CD2851	Cytoplasmic	CD2853	CD630_28530	SpoA
CDIF630erm_03123	CD630_28550	Putative NAD(P)-binding oxidoreductase	0.672795		-1.40871		-0.469202		-2.03877		Cellular Processes	Central energy metabolism	Electron transport	Other	Cytoplasmic	CD2855	CD630_28550
CDIF630erm_03125	CD630_28570	Putative hydrolase, HAD superfamily, IA subfamily (EC 3.1.3.-)	OFF		OFF		1.25174		1.22851		Miscellaneous	Miscellaneous	Uncharacterized proteins	CD2856	Cytoplasmic	CD2857	CD630_28570
CDIF630erm_03126	CD630_28580	Putative membrane protein			OFF						Miscellaneous	Miscellaneous	Uncharacterized proteins	CD2856	CytoplasmicMembrane	CD2858	CD630_28580
CDIF630erm_03127	CD630_28590	Putative D-aminoacylase (EC 3.5.1.81)					ON		ON		Miscellaneous	Miscellaneous	Uncharacterized proteins	CD2859	Cytoplasmic	CD2859	CD630_28590	CodY
CDIF630erm_03130	CD630_28620	membrane dipeptidase	OFF								Miscellaneous	Miscellaneous	Uncharacterized proteins	CD2859	Cytoplasmic	CD2862	CD630_28620	CodY; RpoN (Target)
CDIF630erm_03131	CD630_28630	Transcriptional regulator, sigma-54-dependent					ON		ON		Cellular Processes	Stress Response and virulence	RpoN dependent stress reponse	Other	Cytoplasmic	CD2863	CD630_28630	SigF; RpoN (EBP)
CDIF630erm_03132	CD630_28640	Putative hydrolase (EC 3.1.-.-)	1.06793		ON		OFF				Miscellaneous	Miscellaneous	Uncharacterized proteins	Other	Cytoplasmic	CD2864	CD630_28640	SigH; Hfq; SigF; SigE; SpoA; SigB
CDIF630erm_03133	CD630_28650	Putative bacterioferritin	ON		ON						Cellular Processes	Cofactors	Cation transporters	Other	Cytoplasmic	CD2865	CD630_28650	SigH; SigE; SpoA; SigB
CDIF630erm_03134	CD630_28660	Putative modulator of DNA gyrase, peptidase U62	-0.294633		-0.911078		-2.3547		OFF		Cellular process	Protein folding and degradation	Protein folding and degradation	281385	Cytoplasmic	CD2866	CD630_28660
CDIF630erm_03135	tldD	metalloprotease TldD	-0.263737		0.751444		-1.78246		-1.75665		Cellular process	Protein folding and degradation	Protein folding and degradation	281385	Cytoplasmic	CD2867	CD630_28670
CDIF630erm_03140	uxaA	altronate dehydratase, C-terminal region	OFF		OFF				OFF		Cellular Processes	Carbohydrate metabolism	Galacturonate	Other	Cytoplasmic	CD2872	CD630_28720	RpoN (Target)
CDIF630erm_03146	fhuD	ABC-type transport system, ferrichrome-specific extracellular solute-binding protein	-1.6229		OFF		0.226463		-1.07074		Cellular Processes	Cofactors	Iron	Other	CytoplasmicMembrane	CD2878	CD630_28780	Fur
CDIF630erm_03147	CD630_28790	Uncharacterized protein	-0.874057		-1.21795		1.09931		0.231466		Miscellaneous	Miscellaneous	Uncharacterized proteins	Other	Cytoplasmic	CD2879	CD630_28790
CDIF630erm_03149	celG	putative chitooligosaccharide deacetylase					ON		ON		Cellular Processes	Carbohydrate metabolism	Cellobiose	CD2880	Cytoplasmic	CD2881	CD630_28810
CDIF630erm_03152	celA	PTS system, cellobiose-specific IIB component (EC 2.7.1.69)							ON		Cellular Processes	Carbohydrate metabolism	Cellobiose	CD2880	Cytoplasmic	CD2884	CD630_28840	SigB
CDIF630erm_03153	CD630_28850	Transcriptional regulator, GntR family			OFF		ON		1.09119		Cellular Processes	Carbohydrate metabolism	Cellobiose	Other	Unknown	CD2885	CD630_28850
CDIF630erm_03160	CD630_28900	Putative phage protein	-1.04127		-0.885914		0.264881		1.22996		Cellular Processes	Stress Response and virulence	Prophages	Other	Cytoplasmic	CD2890	CD630_28900
CDIF630erm_03161	CDIF630erm_03161	putative protein-export protein, SecB-like	-1.09355		-0.399795		-0.0785563		-0.375189		Cellular Processes	Stress Response and virulence	Prophages	Other	Cytoplasmic	#N/A	#REF!
CDIF630erm_03162	CDIF630erm_03162	putative phage protein	-1.09511		-0.451018		0.459402		0.693643		Cellular Processes	Stress Response and virulence	Prophages	Other	Unknown	#N/A	#REF!
CDIF630erm_03178	CDIF630erm_03178	putative phage protein	-1.70491		-0.322818		-1.1296		-0.325825		Cellular Processes	Stress Response and virulence	Prophages	Other	Cytoplasmic	#N/A	#REF!
CDIF630erm_03179	CDIF630erm_03179	putative phage lipoprotein	-0.621737		-0.18415		-0.322027		-1.4171		Cellular Processes	Stress Response and virulence	Prophages	Other	Unknown	#N/A	#REF!
CDIF630erm_03192	CDIF630erm_03192	putative phage protein			ON						Cellular Processes	Stress Response and virulence	Prophages	Other	Unknown	#N/A	#REF!
CDIF630erm_03197	CDIF630erm_03197	putative phage protein	1.40426		2.04786		1.11575		0.843543		Cellular Processes	Stress Response and virulence	Prophages	Other	Unknown	#N/A	#REF!
CDIF630erm_03198	CDIF630erm_03198	putative phage protein	1.33328		2.41968		-0.282047		0.804598		Cellular Processes	Stress Response and virulence	Prophages	Other	Cytoplasmic	#N/A	#REF!
CDIF630erm_03200	CD630_29260	Putative phage protein	-0.197262		1.12257		-0.769697		0.00670131		Cellular Processes	Stress Response and virulence	Prophages	Other	CytoplasmicMembrane	CD2926	CD630_29260
CDIF630erm_03203	CD630_29270	Transcriptional regulator, Phage-type							ON		Miscellaneous	Miscellaneous	Uncharacterized proteins	281396	Cytoplasmic	CD2927	CD630_29270	SigH; Hfq
CDIF630erm_03204	CD630_29280	Uncharacterized protein			0.393923		ON		0.304098		Miscellaneous	Miscellaneous	Uncharacterized proteins	281396	Unknown	CD2928	CD630_29280
CDIF630erm_03228	CD630_29470	Putative phage protein	OFF		OFF		-0.0404009		-1.67166		Cellular Processes	Stress Response and virulence	Prophages	CD2942	Cytoplasmic	CD2947	CD630_29470
CDIF630erm_03230	CD630_29480	Putative phage protein			OFF				OFF		Cellular Processes	Stress Response and virulence	Prophages	CD2942	Cytoplasmic	CD2948	CD630_29480
CDIF630erm_03232	CD630_29500	Transcriptional regulator, HTH-type	-0.112257		0.314891		-0.25033		-2.84827		Cellular Processes	Stress Response and virulence	Prophages	CD2950	Cytoplasmic	CD2950	CD630_29500
CDIF630erm_03234	CD630_29520	Putative phage site-specific integrase							ON		Cellular Processes	Stress Response and virulence	Prophages	CD2950	Unknown	CD2952	CD630_29520
CDIF630erm_03237	atpD	V-type ATP synthase subunit D (V-ATPase subunit D)	1.09354		1.36664		OFF		-3.45731		Cellular Processes	ATP synthases	V-Type ATP synthase	CD2954	Cytoplasmic	CD2954	CD630_29540	SigH; CodY
CDIF630erm_03238	atpB	V-type ATP synthase beta chain (V-ATPase subunit B)	1.19635		1.06498		-1.71204		-2.30826		Cellular Processes	ATP synthases	V-Type ATP synthase	CD2954	Cytoplasmic	CD2955	CD630_29550	SigH; CodY; SpoA
CDIF630erm_03239	atpA	V-type ATP synthase alpha chain (EC 7.1.2.2) (V-ATPase subunit A)	0.524652		1.29999	*	-1.15747		-0.842644		Cellular Processes	ATP synthases	V-Type ATP synthase	CD2954	CytoplasmicMembrane	CD2956	CD630_29560	SigH; CodY; SpoA
CDIF630erm_03240	atpF	V-type ATP synthase subunit F (EC 3.6.3.14)	ON		ON						Cellular Processes	ATP synthases	V-Type ATP synthase	CD2954	CytoplasmicMembrane	CD2956A	CD630_29561	SigH
CDIF630erm_03241	atpC	V-type ATP synthase subunit C (EC 3.6.3.14)	1.38188		1.61209	*	0.191521		-2.3046		Cellular Processes	ATP synthases	V-Type ATP synthase	CD2954	Cytoplasmic	CD2957	CD630_29570	SigH; CodY
CDIF630erm_03242	atpE	V-type ATP synthase subunit E (V-ATPase subunit E)	1.03385		1.66832	*	-1.24717		-1.73777		Cellular Processes	ATP synthases	V-Type ATP synthase	CD2954	Cytoplasmic	CD2958	CD630_29580	SigH; CodY
CDIF630erm_03243	atpK	V-type ATP synthase subunit K (EC 3.6.3.14)	0.284904		0.847748		-1.1826		-1.40614		Cellular Processes	ATP synthases	V-Type ATP synthase	CD2954	CytoplasmicMembrane	CD2959	CD630_29590	SigH; CodY
CDIF630erm_03244	atpI	V-type ATP synthase subunit I	2.21512		3.30487		OFF		OFF		Cellular Processes	ATP synthases	V-Type ATP synthase	CD2954	CytoplasmicMembrane	CD2960	CD630_29600	SigH; CodY; SpoA
CDIF630erm_03245	CD630_29610	Uncharacterized protein	1.59194		1.80284	*	-0.631247		-1.40319		Cellular Processes	ATP synthases	V-Type ATP synthase	CD2954	Cytoplasmic	CD2961	CD630_29610	SigH; ccpA; CodY
CDIF630erm_03247	CD630_29630	peptidoglycan transpeptidase	-1.53686		-3.56059	*	0.162085		-1.67839	*	Cell Envelope	Cell wall	Peptidoglycan turnover	Other	Unknown	CD2963	CD630_29630	SigB
CDIF630erm_03248	CD630_29640	Putative tRNA-binding protein	-0.496603		-0.412544		1.18328	*	0.480373		Cellular process	Protein synthesis	tRNA metabolism	Other	Cytoplasmic	CD2964	CD630_29640
CDIF630erm_03249	CD630_29650	Phosphodiesterase	-2.05555		-2.54038		0.768463		0.323087		Cellular Processes	Regulation and cell signaling	Putative signaling protein	Other	CytoplasmicMembrane	CD2965	CD630_29650	ccpA
CDIF630erm_03250	adhE1	Aldehyde-alcohol dehydrogenase	0.471341		-0.193118		0.600498		0.144809		Cellular Processes	Central energy metabolism	Fermentation	Other	Cytoplasmic	CD2966	CD630_29660	SigB
CDIF630erm_03252	spoVFB	Dipicolinate synthase subunit B	3.03341		4.25818		OFF		OFF		Cellular Processes	Sporulation and germination	Sporulation and germination	Other	CytoplasmicMembrane	CD2967	CD630_29670	Hfq; SigF; SigE; SigK
CDIF630erm_03257	CD630_29720	Uncharacterized protein	-0.668795		-0.945466		0.579577		1.2345		Miscellaneous	Miscellaneous	Uncharacterized proteins	Other	Unknown	CD2972	CD630_29720
CDIF630erm_03258	CD630_29730	Putative acetyltransferase	-1.09682		-0.992582		2.00352		1.73172		Miscellaneous	Miscellaneous	Uncharacterized proteins	Other	Unknown	CD2973	CD630_29730
CDIF630erm_03262	CD630_29780	Putative CRISPR-associated Cas3 family helicase	-0.449772		0.0819867		1.74494	*	2.32153	*	Cellular Processes	Stress Response and virulence	Prophages	CD2975	Unknown	CD2978	CD630_29780	ccpA; SpoA
CDIF630erm_03263	CD630_29790	Putative CRISPR-associated Cas5 family protein	0.485684		1.07746		-0.313055		-0.0995716		Cellular Processes	Stress Response and virulence	Prophages	CD2975	Cytoplasmic	CD2979	CD630_29790	SpoA
CDIF630erm_03264	CD630_29800	Putative CRISPR-associated autoregulator DevR family protein protein	0.976905		0.812145		-0.131578		0.47269		Cellular Processes	Stress Response and virulence	Prophages	CD2975	Unknown	CD2980	CD630_29800
CDIF630erm_03265	CD630_29810	Putative CRISPR-associated protein, CXXC-CXXC	0.0343233		1.40343		-1.18725		0.301937		Cellular Processes	Stress Response and virulence	Prophages	CD2975	Cytoplasmic	CD2981	CD630_29810	ccpA; SpoA
CDIF630erm_03267	CD630_29830	Putative Helix-Turn-Helix DNA-binding protein					ON		ON		Cellular Processes	DNA and RNA metabolism	DNA metabolism	Other	Cytoplasmic	CD2983	CD630_29830
CDIF630erm_03272	graR	Two-component response regulator					ON		ON		Cellular Processes	Stress Response and virulence	Resistance to antimicrobial peptides	Other	Cytoplasmic	CD2988	CD630_29880	Fur
CDIF630erm_03273	ssuA2	ABC-type transport system, sulfonate-family extracellular solute-binding protein	-0.900997		-3.06094	*	0.425495		-0.925215		Cellular Processes	Cofactors	Nitrogen and sulfur metabolism	CD2989	Unknown	CD2989	CD630_29890	Fur
CDIF630erm_03274	ssuB2	ABC-type transport system, sulfonate-family ATP-binding protein (EC 3.6.3.-)			OFF		ON		1.34464		Cellular Processes	Cofactors	Nitrogen and sulfur metabolism	CD2989	CytoplasmicMembrane	CD2990	CD630_29900	Fur
CDIF630erm_03276	CD630_29920	uncharacterized protein, iron hydrogenase-like	-4.78687		OFF		-1.58984		4.47867		Cellular Processes	Cofactors	Nitrogen and sulfur metabolism	CD2989	Cytoplasmic	CD2992	CD630_29920	Fur
CDIF630erm_03277	CD630_29930	regulatory factor, effector binding protein							ON		Miscellaneous	Miscellaneous	Uncharacterized proteins	Other	Cytoplasmic	CD2993	CD630_29930
CDIF630erm_03278	nrdF	Ribonucleoside-diphosphate reductase subunit beta (EC 1.17.4.1)					ON				Cellular Processes	DNA and RNA metabolism	Nucleosides and nucleotide metabolism	CD2993	CytoplasmicMembrane	CD2994	CD630_29940
CDIF630erm_03279	nrdE	Ribonucleoside-diphosphate reductase (EC 1.17.4.1)			OFF		ON		3.42044		Cellular Processes	DNA and RNA metabolism	Nucleosides and nucleotide metabolism	CD2993	Cytoplasmic	CD2995	CD630_29950	c-di-GMP; SigB
CDIF630erm_03280	CD630_29960	Uncharacterized protein	OFF	*	OFF		2.11971		1.61263		Miscellaneous	Miscellaneous	Uncharacterized proteins	Other	Cytoplasmic	CD2996	CD630_29960	SigH; ccpA
CDIF630erm_03281	btuD	ABC-type transport system, cobalamin-specific ATP-binding protein			OFF	*	1.98576		2.50951		Cellular Processes	Cofactors	Cobalamin	CD2997	CytoplasmicMembrane	CD2997	CD630_29970
CDIF630erm_03283	btuF	ABC-type transport system, cobalamin-specific extracellular solute-binding protein	-1.44208		-2.18858	*	0.651048		-0.94303	*	Cellular Processes	Cofactors	Cobalamin	CD2997	Unknown	CD2999	CD630_29990
CDIF630erm_03287	suyB	(2R)-sulfolactate sulfo-lyase subunit beta	1.17293		ON		OFF				Cellular Processes	Amino acid metabolism	Amino acid metabolism	CD3000	Cytoplasmic	CD3002	CD630_30020
CDIF630erm_03288	suyA	(2R)-sulfolactate sulfo-lyase subunit alpha	1.34649	*	OFF		-0.525196		OFF		Cellular Processes	Carbohydrate metabolism	Galacturonate	Other	Cytoplasmic	CD3003	CD630_30030
CDIF630erm_03290	CD630_30050	Transcriptional regulator, IclR family	-1.2616		-0.570166		-0.0650107		0.723263		Cellular Processes	Regulation and cell signaling	Transcriptional regulators	IclR family transcriptional regulators	Cytoplasmic	CD3005	CD630_30050
CDIF630erm_03291	adhB	Alcohol dehydrogenase (EC 1.1.1.1)	ON		ON				ON		Cellular Processes	Central energy metabolism	Fermentation	Other	Cytoplasmic	CD3006	CD630_30060	CodY
CDIF630erm_03292	CD630_30070	Uncharacterized protein with SH3 domain			ON						Cell Envelope	Cell wall	Peptidoglycan turnover	Other	Unknown	CD3007	CD630_30070	SigE; SigB
CDIF630erm_03293	CDIF630erm_03293	hypothetical protein	OFF				OFF				Miscellaneous	Miscellaneous	Uncharacterized proteins	Other	Cytoplasmic	CD3008	CD630_30080
CDIF630erm_03294	CD630_30090	Putative pyridine nucleotide-disulphide oxidoreductase, class I	1.29853		-0.423916		OFF		OFF		Cellular Processes	Central energy metabolism	Enzyme of central carbon metabolism	Other	Cytoplasmic	CD3009	CD630_30090
CDIF630erm_03296	CD630_30110	Transcriptional regulator, HxlR family DUF24					ON		ON		Cellular Processes	Regulation and cell signaling	Transcriptional regulators	Other	Cytoplasmic	CD3011	CD630_30110	SigH
CDIF630erm_03297	CD630_30120	putative mannosylglycerate hydrolase			OFF		-1.22193		-0.0473439		Cellular Processes	Carbohydrate metabolism	Mannose	CD3012	Cytoplasmic	CD3012	CD630_30120	SigB
CDIF630erm_03298	CD630_30130	PTS system, mannose-specfic IIC component	-1.87714	*	OFF		-0.242046	*	-0.862978		Cellular Processes	Carbohydrate metabolism	Mannose	CD3012	CytoplasmicMembrane	CD3013	CD630_30130	Hfq; SigB
CDIF630erm_03299	CD630_30140	PTS system, mannose-specfic IIB component (EC 2.7.1.69)	-0.17149		0.477861		-0.821166		0.181467		Cellular Processes	Carbohydrate metabolism	Mannose	CD3012	Unknown	CD3014	CD630_30140	Hfq; SigB
CDIF630erm_03300	CD630_30150	PTS system, mannose-specfic IIA component	-0.460437		-1.2928		3.30326	*	1.5528		Cellular Processes	Carbohydrate metabolism	Mannose	CD3012	Cytoplasmic	CD3015	CD630_30150	Hfq; SigB
CDIF630erm_03301	CD630_30160	Transcription antiterminator, PTS operon regulator	-2.84193		-1.53082		0.850396		1.60598	*	Cellular Processes	Carbohydrate metabolism	Mannose	CD3012	Cytoplasmic	CD3016	CD630_30160	SigB
CDIF630erm_03303	CD630_30180	Oxidoreductase	0.331055		0.0233821		-0.43069		-1.83852	*	Cellular Processes	Central energy metabolism	Electron transport	Other	Cytoplasmic	CD3018	CD630_30180	Hfq
CDIF630erm_03310	CD630_30260	DNA-binding protein	-1.50079		-0.239923		OFF		0.439134		Cellular Processes	Regulation and cell signaling	Transcriptional regulators	Other	Cytoplasmic	CD3026	CD630_30260
CDIF630erm_03311	CD630_30270	PTS system, arabinose-specific IIA component	0.120782		-0.295614		-0.112187		-0.144466		Cellular Processes	Carbohydrate metabolism	Arabinose	CD3027	Cytoplasmic	CD3027	CD630_30270	Hfq; SigD; SigB
CDIF630erm_03312	kpsF	arabinose 5-phosphate isomerase	-1.59384	*	-1.46874		-0.261795		0.373911		Cellular Processes	Carbohydrate metabolism	Arabinose	CD3027	Cytoplasmic	CD3028	CD630_30280	SigH; Hfq; SigD; SigB
CDIF630erm_03313	malY	Bifunctional protein: cystathionine beta-lyase / repressor (EC 4.4.1.8)	-1.1847		-2.11564		3.98678	*	2.58778	*	Cellular Processes	Cofactors	Nitrogen and sulfur metabolism	CD3027	Cytoplasmic	CD3029	CD630_30290	Hfq; SigD
CDIF630erm_03314	CD630_30300	PTS system, arabinose-specific IIBC component	-2.31507		-4.09688	*	1.11745		-1.2262		Cellular Processes	Carbohydrate metabolism	Arabinose	CD3027	CytoplasmicMembrane	CD3030	CD630_30300	SigH; Hfq; SigD; SigB
CDIF630erm_03315	CD630_30310	Transcription antiterminator, PTS operon regulator	-0.244755		-0.64106		2.19329	*	1.05496		Cellular Processes	Carbohydrate metabolism	Arabinose	Other	Cytoplasmic	CD3031	CD630_30310	ccpA; Hfq; SigD
CDIF630erm_03316	sufS1	putative cysteine desulfurase			ON						Cellular Processes	Cofactors	Sulfur Metabolism	Other	Cytoplasmic	CD3032	CD630_30320	SigB
CDIF630erm_03318	CD630_30340	Transcriptional regulator, TrmB family			OFF		ON		0.823928		Cellular Processes	Regulation and cell signaling	Transcriptional regulators	Other	Unknown	CD3034	CD630_30340
CDIF630erm_03319	yddE3	putative isomerase YddE	0.320804		0.409728		OFF		OFF		Cellular Processes	Stress Response and virulence	Virulence	Other	Cytoplasmic	CD3035	CD630_30350
CDIF630erm_03323	CD630_30390	Putative ATPase					ON		ON		Miscellaneous	Miscellaneous	Uncharacterized proteins	CD3038	Cytoplasmic	CD3039	CD630_30390	ccpA; c-di-GMP
CDIF630erm_03324	CD630_30400	Uncharacterized protein					ON		ON		Miscellaneous	Miscellaneous	Uncharacterized proteins	CD3038	Cytoplasmic	CD3040	CD630_30400	ccpA; c-di-GMP
CDIF630erm_03325	pip	Proline iminopeptidase (PIP) (EC 3.4.11.5) (Prolyl aminopeptidase) (PAP)	-0.0322459		-0.049583		-0.661762		0.582054		Cellular Processes	Amino acid metabolism	Proline and 4-hydroxyproline metabolism	Other	Cytoplasmic	CD3041	CD630_30410
CDIF630erm_03327	CD630_30430	Uncharacterized protein	0.937928		-0.253163		OFF		OFF		Miscellaneous	Miscellaneous	Uncharacterized proteins	Other	Unknown	CD3043	CD630_30430
CDIF630erm_03328	CD630_30440	Transcriptional regulator, RpiR family	OFF		0.916683		1.02141	*	1.82239		Cellular Processes	Carbohydrate metabolism	Amino sugar metabolism	Other	Cytoplasmic	CD3044	CD630_30440
CDIF630erm_03337	CD630_30540	Two-component response regulator					ON		ON		Cellular Processes	Stress Response and virulence	Resistance to antimicrobial peptides	Other	Cytoplasmic	CD3054	CD630_30540
CDIF630erm_03345	CD630_30620	Transcriptional regulator, RpiR family			OFF		ON		0.259296		Cellular Processes	Regulation and cell signaling	Transcriptional regulators	RpiR family transcriptional regulators	Unknown	CD3062	CD630_30620
CDIF630erm_03347	xylA	Xylose isomerase (EC 5.3.1.5)			ON						Cellular Processes	Carbohydrate metabolism	Xylose	281425	Cytoplasmic	CD3064	CD630_30640	ccpA
CDIF630erm_03348	xylB	Xylulose kinase (Xylulokinase) (EC 2.7.1.17)					ON		ON		Cellular Processes	Carbohydrate metabolism	Xylose	281425	Cytoplasmic	CD3065	CD630_30650
CDIF630erm_03349	xylR	Transcriptional regulator, Xylose repressor		*	OFF				1.55388		Cellular Processes	Carbohydrate metabolism	Xylose	Other	Cytoplasmic	CD3066	CD630_30660
CDIF630erm_03350	xynA	PTS system, xyloside-specific IIA component	0.700399		1.85514		0.7614		1.51139		Cellular Processes	Carbohydrate metabolism	Xylose	CD3067	Cytoplasmic	CD3067	CD630_30670	ccpA; SigB
CDIF630erm_03351	xynB	PTS system, xyloside-specific IIB component (EC 2.7.1.69)	0.365393		0.57152		-0.70958		-0.206928		Cellular Processes	Carbohydrate metabolism	Xylose	CD3067	Cytoplasmic	CD3068	CD630_30680	SigB
CDIF630erm_03354	xylS	alpha-xylosidase	ON								Cellular Processes	Carbohydrate metabolism	Xylose	CD3067	Cytoplasmic	CD3071	CD630_30710
CDIF630erm_03355	CD630_30720	Uncharacterized protein	0.551324		ON		-3.25359				Miscellaneous	Miscellaneous	Uncharacterized proteins	Other	Cytoplasmic	CD3072	CD630_30720
CDIF630erm_03357	gatY1	D-tagatose-1,6-bisphosphate aldolase	-3.6659		-4.77361		1.78475		1.29117		Cellular Processes	Carbohydrate metabolism	Tagatose	CD3074	Cytoplasmic	CD3074	CD630_30740
CDIF630erm_03358	tagABC	PTS system, tagatose-specific IIABC component (EC 2.7.1.69)	OFF		OFF		0.404035		-0.531257		Cellular Processes	Carbohydrate metabolism	Tagatose	CD3074	CytoplasmicMembrane	CD3075	CD630_30750
CDIF630erm_03359	tagK	Tagatose-6-phosphate kinase (EC 2.7.1.144)	OFF	*	OFF		3.20072		1.3555		Cellular Processes	Carbohydrate metabolism	Tagatose	CD3074	CytoplasmicMembrane	CD3076	CD630_30760
CDIF630erm_03367	garK	Glycerate kinase (EC 2.7.1.31)	OFF		-2.05353		4.04466		2.76901		Cellular Processes	Central energy metabolism	Glyoxylate metabolism	Other	Cytoplasmic	CD3084	CD630_30840
CDIF630erm_03370	CD630_30870	Transcriptional regulator, RpiR family	ON	*			ON		ON		Cellular Processes	Carbohydrate metabolism	Transcriptional regulator fo carbohydrate metabolism	Other	Unknown	CD3087	CD630_30870
CDIF630erm_03371	CD630_30880	Putative cellobiose-phosphate degrading protein	-0.219273		0.18148		1.46906		1.56823	*	Cellular Processes	Carbohydrate metabolism	Cellobiose	281429	Cytoplasmic	CD3088	CD630_30880	SigH; SigB
CDIF630erm_03372	CD630_30890	PTS system, glucose-like IIBC component (EC 2.7.1.69)	0.27569		-1.05516	*	1.11635		0.235404		Cellular Processes	Carbohydrate metabolism	Glucose	281429	CytoplasmicMembrane	CD3089	CD630_30890	SigH; SigB
CDIF630erm_03373	treR	Transcriptional regulator, GntR family	-0.806917		-1.73254		2.42258	*	1.60963	*	Cellular Processes	Carbohydrate metabolism	Trehalose	Other	Unknown	CD3090	CD630_30900
CDIF630erm_03374	treA	Trehalose-6-phosphate hydrolase (EC 3.2.1.93)	-0.409352		-1.02221		-0.615895		1.28198	*	Cellular Processes	Carbohydrate metabolism	Trehalose	Other	Cytoplasmic	CD3091	CD630_30910	Fur; SpoA; SigB
CDIF630erm_03378	bglA3	6-phospho-beta-glucosidase, bglA2 (EC 3.2.1.86)	1.66409		1.58957		-1.3454		1.3418		Cellular Processes	Carbohydrate metabolism	Glycolysis and gluconeogenesis	CD3095	Cytoplasmic	CD3095	CD630_30950	Fur
CDIF630erm_03379	ascB1	6-phospho-beta-glucosidase, bglA3 (EC 3.2.1.86)	2.71347		1.78308		0.198425		0.616805		Cellular Processes	Carbohydrate metabolism	Glucosides	CD3095	Cytoplasmic	CD3096	CD630_30960	Fur
CDIF630erm_03380	bglF2	PTS system, beta-glucoside-specific IIABC component, bglF2 (EC 2.7.1.69)							ON		Cellular Processes	Carbohydrate metabolism	Glucosides	CD3095	CytoplasmicMembrane	CD3097	CD630_30970	Fur
CDIF630erm_03381	bglG1	Transcription antiterminator, PTS operon regulator, bglG1			OFF		ON		1.73346		Cellular Processes	Carbohydrate metabolism	Glucosides	CD3095	Cytoplasmic	CD3098	CD630_30980
CDIF630erm_03382	CD630_30990	putative amidohydrolase, M20D family	-0.195789		-1.16841		-1.70019		-2.12342		Cellular process	Protein folding and degradation	Peptidases	Other	Cytoplasmic	CD3099	CD630_30990	c-di-GMP
CDIF630erm_03383	CD630_31000	Putative C4-dicarboxylate anaerobic carrier,DcuC family			OFF		ON		-1.75291		Cellular Processes	Central energy metabolism	Electron transport	Other	CytoplasmicMembrane	CD3100	CD630_31000	c-di-GMP
CDIF630erm_03387	CD630_31030	PTS system, glucose-like IIA component	-1.13924		0.587873		-2.19026		OFF		Cellular Processes	Carbohydrate metabolism	Glucose	Other	CytoplasmicMembrane	CD3103	CD630_31030
CDIF630erm_03391	CD630_31070	Transcription antiterminator, PTS operon regulator							ON		Cellular Processes	Carbohydrate metabolism	Glucose	Other	Cytoplasmic	CD3107	CD630_31070
CDIF630erm_03395	CD630_31110	Uncharacterized protein		*	OFF		ON		2.18992		Miscellaneous	Miscellaneous	Uncharacterized proteins	Other	Unknown	CD3111	CD630_31110
CDIF630erm_03399	bglA4	6-phospho-beta-glucosidase, bglA4 (EC 3.2.1.86)	0.388141		-0.583463		0.238573		0.982917	*	Cellular Processes	Energy metabolism	Glycolysis and gluconeogenesis	CD3115	Cytoplasmic	CD3115	CD630_31150	SigH; SpoA
CDIF630erm_03400	bglF3	PTS system, beta-glucoside-specific IIABC component, bglF3 (EC 2.7.1.69)			OFF		ON		1.39739		Cellular Processes	Energy metabolism	Glycolysis and gluconeogenesis	CD3115	CytoplasmicMembrane	CD3116	CD630_31160	SigH; SpoA
CDIF630erm_03401	bglG2	Transcription antiterminator, PTS operon regulator, bglG2	0.433597		0.159648		1.61888		1.35224	*	Cellular Processes	Energy metabolism	Glycolysis and gluconeogenesis	CD3115	Cytoplasmic	CD3117	CD630_31170	SigH; SpoA
CDIF630erm_03404	CD630_31200	Transcriptional regulator, AbrB family	-4.35965		OFF		-3.02882		0.482299		Cellular Processes	Regulation and cell signaling	Transcriptional regulators	Other	Cytoplasmic	CD3120	CD630_31200
CDIF630erm_03406	CD630_31210	putative flavodoxin			0.190285		0.452489	*	1.4455		Cellular Processes	Central energy metabolism	Electron transport	Other	Unknown	CD3121	CD630_31210
CDIF630erm_03410	bglF4	PTS system, beta-glucoside-specific IIABC component, bglF4 (EC 2.7.1.69)			OFF		ON		2.97006		Cellular Processes	Carbohydrate metabolism	Glucosides	Other	CytoplasmicMembrane	CD3125	CD630_31250
CDIF630erm_03419	CD630_31340	PTS system, fructose-like IIABC component (EC 2.7.1.69)	OFF		OFF		-3.0422		OFF		Cellular Processes	Carbohydrate metabolism	Fructose	281443	CytoplasmicMembrane	CD3134	CD630_31340
CDIF630erm_03420	gatY2	D-tagatose-1,6-bisphosphate aldolase	OFF		-4.44882		-4.0408		-1.38859		Cellular Processes	Carbohydrate metabolism	Fructose	281443	Cytoplasmic	CD3135	CD630_31350
CDIF630erm_03421	bglA5	6-phospho-beta-glucosidase, bglA7 (EC 3.2.1.86)	0.286501		-1.31157	*	1.45124		0.952862	*	Cellular Processes	Energy metabolism	Glycolysis and gluconeogenesis	CD3136	Cytoplasmic	CD3136	CD630_31360	SigH; Hfq; SpoA; SigB
CDIF630erm_03422	bglF5	PTS system, beta-glucoside-specific IIABC component, bglF5 (EC 2.7.1.69)	-0.601328		-2.43627	*	2.45275	*	0.926468	*	Cellular Processes	Energy metabolism	Glycolysis and gluconeogenesis	CD3136	CytoplasmicMembrane	CD3137	CD630_31370	SigH; Hfq; SpoA; SigB
CDIF630erm_03423	bglG4	Transcription antiterminator, PTS operon regulator, bglG4	-0.12579		-0.718194		1.88828	*	1.2892	*	Cellular Processes	Energy metabolism	Glycolysis and gluconeogenesis	CD3136	Cytoplasmic	CD3138	CD630_31380	SigH; SpoA; SigB
CDIF630erm_03427	CD630_31430	Putative ThiJ/pfpI family protein					ON		ON		Miscellaneous	Miscellaneous	Uncharacterized proteins	Other	Cytoplasmic	CD3143	CD630_31430
CDIF630erm_03429	CD630_31450	Putative serine-aspartate repeat-containing protein SdrF							ON		Cellular Processes	Amino acid metabolism	Glutamine, glutamate, aspartate and asparagine metabolism	Glutamine, glutamate, aspartate and asparagine metabolism	Extracellular	CD3145	CD630_31450	SigH; ccpA; SigD; SpoA; SigB
CDIF630erm_03432	CD630_31470	Putative DNA-methyltransferase					ON		ON		Cellular Processes	DNA and RNA metabolism	DNA metabolism	Other	Cytoplasmic	CD3147	CD630_31470
CDIF630erm_03433	CD630_31480	Uncharacterized protein	OFF				1.07365		ON		Miscellaneous	Miscellaneous	Uncharacterized proteins	CD3148	Unknown	CD3148	CD630_31480
CDIF630erm_03434	CD630_31490	DNA helicase	-2.09007		-1.87759		1.64547	*	2.01931	*	Cellular Processes	DNA and RNA metabolism	DNA metabolism	Other	CytoplasmicMembrane	CD3149	CD630_31490
CDIF630erm_03435	CD630_31500	Uncharacterized protein	OFF		OFF		-0.216968		0.259097		Miscellaneous	Miscellaneous	Uncharacterized proteins	CD3148	Cytoplasmic	CD3150	CD630_31500	Hfq
CDIF630erm_03439	CD630_31530	Transcriptional regulator, Phage-type					ON		3.00421		Cellular Processes	Stress Response and virulence	Prophages	Other	Cytoplasmic	CD3153	CD630_31530
CDIF630erm_03442	CDIF630erm_03442	putative fic / doc-related protein	-0.134975				OFF				Miscellaneous	Miscellaneous	Uncharacterized proteins	Other	Unknown	CD3155	CD630_31550
CDIF630erm_03444	CD630_31563	Uncharacterized protein					ON		ON		Miscellaneous	Miscellaneous	Uncharacterized proteins	Other	Cytoplasmic	CD3156.3	CD630_31563
CDIF630erm_03445	CDIF630erm_03445	hypothetical protein	OFF		-0.969417		1.2601		0.0463459		Miscellaneous	Miscellaneous	Uncharacterized proteins	Other	Unknown	#N/A	#REF!
CDIF630erm_03448	smpB	SsrA-binding protein (Small protein B)	-1.29829		-1.67133		0.993479		0.160892		Cellular process	Protein synthesis	Ribosome rescue	Other	Cytoplasmic	CD3157	CD630_31570	ccpA
CDIF630erm_03449	CD630_31580	Transcriptional regulator, TRAP family	-2.49079		-3.90614	*	0.819137		-0.619151		Cellular Processes	Regulation and cell signaling	Transcriptional regulators	Other	CytoplasmicMembrane	CD3158	CD630_31580
CDIF630erm_03454	CD630_31630	Uncharacterized protein	-0.398546		-1.11775		1.88899		1.40221	*	Miscellaneous	Miscellaneous	Uncharacterized proteins	Other	CytoplasmicMembrane	CD3163	CD630_31630
CDIF630erm_03455	rnr	Ribonuclease R (RNase R) (EC 3.1.13.1)	-0.392447		0.0318203		0.0364981		0.708506		Cellular Processes	DNA and RNA metabolism	RNA Processing	Other	Cytoplasmic	CD3164	CD630_31640	SigB
CDIF630erm_03456	CD630_31650	Uncharacterized protein			ON						Miscellaneous	Miscellaneous	Uncharacterized proteins	CD3165	Cytoplasmic	CD3165	CD630_31650	SpoA
CDIF630erm_03458	CD630_31670	Putative phosphatidylethanolamine-binding regulatory protein	0.159252		1.88286		-2.36273		-3.40567		Miscellaneous	Miscellaneous	Uncharacterized proteins	CD3165	Unknown	CD3167	CD630_31670	ccpA; SigB
CDIF630erm_03462	eno	Enolase (EC 4.2.1.11) (2-phospho-D-glycerate hydro-lyase) (2-phosphoglycerate dehydratase)	-0.169672		-0.553273		-0.955879		-1.40304		Cellular Processes	Energy metabolism	Glycolysis and gluconeogenesis	Other	Cytoplasmic	CD3170	CD630_31700	SigH; SigB
CDIF630erm_03463	gpmI	2,3-bisphosphoglycerate-independent phosphoglycerate mutase (BPG-independent PGAM) (Phosphoglyceromutase) (iPGM) (EC 5.4.2.12)	0.138715		-0.476675		-1.59385	*	-3.22669		Cellular Processes	Energy metabolism	Glycolysis and gluconeogenesis	CD3171	Cytoplasmic	CD3171	CD630_31710	SigH; SigB
CDIF630erm_03464	tpi	Triosephosphate isomerase (TIM) (TPI) (EC 5.3.1.1) (Triose-phosphate isomerase)	-0.214687		-0.254618		-1.74958	*	-2.8121		Cellular Processes	Energy metabolism	Glycolysis and gluconeogenesis	CD3171	Cytoplasmic	CD3172	CD630_31720	SigH; SigB
CDIF630erm_03465	pgk	Phosphoglycerate kinase (EC 2.7.2.3)	-0.328653		0.122988		-1.27039		-1.00242		Cellular Processes	Energy metabolism	Glycolysis and gluconeogenesis	CD3171	Cytoplasmic	CD3173	CD630_31730	SigH; SigB
CDIF630erm_03466	gapA	Glyceraldehyde-3-phosphate dehydrogenase (EC 1.2.1.-)	0.0352261		-0.126575		-1.17115		-1.45333		Cellular Processes	Energy metabolism	Glycolysis and gluconeogenesis	CD3171	Cytoplasmic	CD3174	CD630_31740	SigH; SpoA; SigB
CDIF630erm_03467	cggR	Transcriptional regulator, SorC family	-0.893708		-0.292204		0.0208312		1.1991		Cellular Processes	Energy metabolism	Glycolysis and gluconeogenesis	CD3171	Cytoplasmic	CD3175	CD630_31750	SigH; SpoA
CDIF630erm_03468	rpoN	RNA polymerase sigma-54 factor	-1.06269		-3.07114	*	1.78998	*	0.94056	*	Cellular Processes	Stress Response and virulence	RpoN dependent stress reponse	Other	Cytoplasmic	CD3176	CD630_31760
CDIF630erm_03471	pyrD2	Dihydroorotate dehydrogenase, catalytic subunit (EC 1.3.3.1)							ON		Cellular Processes	DNA and RNA metabolism	Nucleosides and nucleotide metabolism	Other	Cytoplasmic	CD3179	CD630_31790	SigF; SigE; SigB
CDIF630erm_03475	CD630_31830	Putative peptidase, M20 family									Cellular process	Protein folding and degradation	Peptidases	Other	Cytoplasmic	CD3183	CD630_31830	ccpA; SigF; SigE; SigB
CDIF630erm_03476	dpaL1	Diaminopropionate ammonia-lyase (EC 4.3.1.15)	0.731252		-0.776292		2.61524		0.969784		Cellular Processes	Amino acid metabolism	Lysine, threonine, methionine and cysteine metabolism	Lysine, threonine, methionine and cysteine metabolism	Cytoplasmic	CD3184	CD630_31840	SigF; SigE; RpoN (Target); SigB
CDIF630erm_03478	CD630_31860	Transcriptional regulator, sigma-54-dependent	OFF		OFF	*	1.22644		1.69511		Cellular Processes	Stress Response and virulence	RpoN dependent stress reponse	Other	Cytoplasmic	CD3186	CD630_31860	ccpA; RpoN (EBP)
CDIF630erm_03480	CD630_31880	Uncharacterized protein			OFF				0.660236		Miscellaneous	Miscellaneous	Uncharacterized proteins	Other	Cytoplasmic	CD3188	CD630_31880
CDIF630erm_03481	CD630_31890	Putative NADPH-dependent FMN reductase	0.541537				2.38064		0.401022		Cellular Processes	Central energy metabolism	Electron transport	CD3189	Unknown	CD3189	CD630_31890
CDIF630erm_03483	CD630_31910	Putative oxidoreductase	0.899566		-0.103975		2.42222	*	1.85999	*	Cellular Processes	Central energy metabolism	Electron transport	CD3189	Cytoplasmic	CD3191	CD630_31910
CDIF630erm_03484	cwp21	Putative cell surface peptidase, M4 family-cwp20	0.316785		-0.00520718		-3.10724		-1.93246		Cell Envelope	Cell wall	SlpA and paralogues	Other	Cellwall	CD3192	CD630_31920
CDIF630erm_03488	CD630_31960	Putative penicillin-binding protein			OFF		ON		1.26758		Cellular Processes	Stress Response and virulence	Antibiotic resistance	Other	Unknown	CD3196	CD630_31960
CDIF630erm_03489	CD630_31970	Transcriptional regulator, MerR family					ON				Cellular Processes	Regulation and cell signaling	Transcriptional regulators	MerR family transcriptional regulators	Cytoplasmic	CD3197	CD630_31970
CDIF630erm_03496	CD630_32030	Two-component response regulator					ON				Cellular Processes	Regulation and cell signaling	Uncharacterized two-component system	Other	Cytoplasmic	CD3203	CD630_32030
CDIF630erm_03499	CD630_32050	Putative nitroreductase	-1.38668		-1.20111		-0.841281		0.0174653		Cellular Processes	Cofactors	Nitrogen and sulfur metabolism	Other	Cytoplasmic	CD3205	CD630_32050
CDIF630erm_03502	CD630_32080	Transcriptional regulator, MarR family		*	-1.12646	*	ON		0.844644		Cellular Processes	Regulation and cell signaling	Transcriptional regulators	Other	Cytoplasmic	CD3208	CD630_32080	ccpA
CDIF630erm_03504	CD630_32100	uncharacterized protein, flavoprotein-like					ON				Miscellaneous	Miscellaneous	Uncharacterized proteins	CD3209	Unknown	CD3210	CD630_32100
CDIF630erm_03505	CD630_32110	uncharacterized protein, flavoprotein-like					ON		ON		Miscellaneous	Miscellaneous	Uncharacterized proteins	CD3209	Cytoplasmic	CD3211	CD630_32110	c-di-GMP
CDIF630erm_03506	CD630_32120	putative S-adenosyl-L-methionine-dependent methyltransferase			OFF		1.49788		1.20949		Miscellaneous	Miscellaneous	Uncharacterized proteins	Other	Cytoplasmic	CD3212	CD630_32120
CDIF630erm_03513	hslO	33 kDa chaperonin (Heat shock protein 33 homolog) (HSP33)	-0.996414				-1.61042	*			Cellular Processes	Stress Response and virulence	Resistance to Other stresses than antibiotics	Other	Cytoplasmic	CD3219	CD630_32190
CDIF630erm_03514	CD630_32200	Putative methyltransferase			OFF		ON		1.19399		Cellular Processes	Cofactors	Menaquinone and ubiquinone	Other	Cytoplasmic	CD3220	CD630_32200	SigB
CDIF630erm_03516	CD630_32210	N-acetyldiaminopimelate deacetylase	-0.0460263		0.445751		-0.489596		0.134734		Cellular process	Protein folding and degradation	Peptidases	Other	Cytoplasmic	CD3221	CD630_32210	SigH; ccpA; Hfq
CDIF630erm_03517	sdaB	L-serine dehydratase (EC 4.3.1.17)	-0.367645		-0.713778		-1.16579		-0.268634		Cellular Processes	Amino acid metabolism	Amino acid metabolism	Other	Cytoplasmic	CD3222	CD630_32220
CDIF630erm_03518	dapA2	4-hydroxy-tetrahydrodipicolinate synthase (HTPA synthase) (EC 4.3.3.7)	-0.221658		0.837023		-0.803128		-0.377988		Cellular Processes	Amino acid metabolism	Lysine, threonine, methionine and cysteine metabolism	Lysine, threonine, methionine and cysteine metabolism	Cytoplasmic	CD3223	CD630_32230	SigB
CDIF630erm_03520	asd	Aspartate-semialdehyde dehydrogenase (ASA dehydrogenase) (ASADH) (EC 1.2.1.11) (Aspartate-beta-semialdehyde dehydrogenase)	0.0844712		-0.60818		2.05861	*	1.1523	*	Cellular Processes	Amino acid metabolism	Amino acid metabolism	CD3224	Cytoplasmic	CD3224	CD630_32240
CDIF630erm_03521	dapA3	4-hydroxy-tetrahydrodipicolinate synthase (HTPA synthase) (EC 4.3.3.7)	0.181964		0.176922		-0.824317		-0.74293		Cellular Processes	Amino acid metabolism	Amino acid metabolism	CD3224	Cytoplasmic	CD3225	CD630_32250
CDIF630erm_03522	dapB1	4-hydroxy-tetrahydrodipicolinate reductase (HTPA reductase) (EC 1.17.1.8)	-1.26231		-1.10788		-2.67626	*	OFF		Cellular Processes	Amino acid metabolism	Amino acid metabolism	CD3224	Cytoplasmic	CD3226	CD630_32260	ccpA
CDIF630erm_03523	dapH	2,3,4,5-tetrahydropyridine-2,6-dicarboxylate N-acetyltransferase (EC 2.3.1.89) (Tetrahydrodipicolinate N-acetyltransferase) (THP acetyltransferase) (Tetrahydropicolinate acetylase)	-0.684336		-1.17171		-1.80553		-2.04717		Cellular Processes	Amino acid metabolism	Amino acid metabolism	CD3224	Cytoplasmic	CD3227	CD630_32270
CDIF630erm_03524	CD630_32280	Putative membrane protein	-0.91184		-2.43077	*	0.370218		-1.07671	*	Cell Envelope	Cell membrane	Cell membrane	Other	CytoplasmicMembrane	CD3228	CD630_32280	Hfq
CDIF630erm_03525	dapB2	4-hydroxy-tetrahydrodipicolinate reductase (HTPA reductase) (EC 1.17.1.8)	-1.19814		-0.356577		-1.80698		OFF		Cellular Processes	Amino acid metabolism	Lysine, threonine, methionine and cysteine metabolism	Lysine, threonine, methionine and cysteine metabolism	Cytoplasmic	CD3229	CD630_32290	SigB
CDIF630erm_03527	hpt2	Hypoxanthine phosphoribosyltransferase (EC 2.4.2.8)	-0.668133		0.24925		-1.5594	*	OFF		Cellular Processes	DNA and RNA metabolism	Nucleosides and nucleotide metabolism	Other	Cytoplasmic	CD3231	CD630_32310
CDIF630erm_03528	CD630_32320	UPF0597 protein CD630_32320	-0.979043		-0.977631		0.789425		0.794951		Miscellaneous	Miscellaneous	Uncharacterized proteins	Other	Cytoplasmic	CD3232	CD630_32320	RpoN (Target)
CDIF630erm_03529	CD630_32330	Putative sigma-54 interacting protein	OFF		-2.53116		-0.827515		-0.387149		Miscellaneous	Miscellaneous	Uncharacterized proteins	Other	Cytoplasmic	CD3233	CD630_32330	RpoN (EBP)
CDIF630erm_03531	ssb	Single-stranded DNA-binding protein	0.211543		ON		OFF				Cellular Processes	DNA and RNA metabolism	DNA repair	Other	Cytoplasmic	CD3235	CD630_32350	SigH; SigF; SigE; SpoA; SigB
CDIF630erm_03533	prdF	Proline racemase (EC 5.1.1.4)	0.37856		0.888801		-1.96744		-3.21357		Cellular Processes	Amino acid metabolism	Amino acid metabolism	CD3236	Cytoplasmic	CD3237	CD630_32370	Hfq; RpoN (Target)
CDIF630erm_03535	prdE	Proline reductase PrdE (EC 1.21.4.1)	-0.771207		0.54902		-0.272571		0.124948		Cellular Processes	Amino acid metabolism	Amino acid metabolism	CD3236	Cytoplasmic	CD3239	CD630_32390	ccpA; RpoN (Target)
CDIF630erm_03537	prdB	Proline reductase (Selenocysteine) (EC 1.21.4.1)	-0.909053		-0.278038		-1.56795		-2.20549		Cellular Processes	Amino acid metabolism	Amino acid metabolism	CD3236	Cytoplasmic	CD3241	CD630_32410	ccpA; Hfq; RpoN (Target)
CDIF630erm_03539	CD630_32430	Uncharacterized protein					ON		ON		Miscellaneous	Miscellaneous	Uncharacterized proteins	Other	Cytoplasmic	CD3243	CD630_32430	ccpA; RpoN (Target)
CDIF630erm_03540	prdA	D-proline reductase proprotein prdA (EC 1.21.4.1)	-0.574166		-1.06561	*	-1.4433	*	-2.60807	*	Cellular Processes	Amino acid metabolism	Proline and 4-hydroxyproline metabolism	Other	Cytoplasmic	CD3244	CD630_32440	RpoN (Target)
CDIF630erm_03541	prdR	Transcriptional regulator, sigma-54-dependent	-0.789634		0.563946		-1.13964		0.99616		Cellular Processes	Amino acid metabolism	Proline and 4-hydroxyproline metabolism	Other	Cytoplasmic	CD3245	CD630_32450	RpoN (EBP)
CDIF630erm_03544	prdC	proline reductase PrdC subunit	-0.890341		-1.4125		2.14719		0.503777		Cellular Processes	Amino acid metabolism	Proline and 4-hydroxyproline metabolism	Other	Cytoplasmic	CD3247	CD630_32470	RpoN (Target); SigB
CDIF630erm_03546	sspB	Small, acid-soluble spore protein beta			3.6333				OFF		Cellular Processes	Sporulation and germination	Sporulation and germination	Other	Cytoplasmic	CD3249	CD630_32490	SigH; Hfq; SigF; SigE; SigG; SigB
CDIF630erm_03547	CD630_32500	Uncharacterized protein	-0.450235		0.144666		1.24927		0.493582		Miscellaneous	Miscellaneous	Uncharacterized proteins	Other	Unknown	CD3250	CD630_32500
CDIF630erm_03550	folC	Folylpolyglutamate synthase (EC 6.3.2.17)	0.187988		-0.750436		0.480983		1.23138	*	Cellular Processes	Cofactors	Folate and pterines	Other	Cytoplasmic	CD3253	CD630_32530
CDIF630erm_03551	CD630_32540	Putative peptidase, S8 or S52 family					ON				Cellular process	Protein folding and degradation	Peptidases	Other	Cytoplasmic	CD3254	CD630_32540
CDIF630erm_03552	rgaR	Two-component response regulator VirR-like					ON		ON		Cellular Processes	Regulation and cell signaling	Uncharacterized two-component system	Other	Cytoplasmic	CD3255	CD630_32550
CDIF630erm_03553	valS	Valine--tRNA ligase (EC 6.1.1.9) (Valyl-tRNA synthetase) (ValRS)	0.662614		-0.22771		0.481712		0.969203		Cellular process	Protein synthesis	tRNA metabolism	Other	Cytoplasmic	CD3256	CD630_32560	SigH
CDIF630erm_03564	CD630_32650	Two-component response regulator			ON		ON		ON		Cellular Processes	Regulation and cell signaling	Uncharacterized two-component system	Other	Cytoplasmic	CD3265	CD630_32650	c-di-GMP
CDIF630erm_03568	pstS	ABC-type transport system, phosphate extracellular solute-binding protein			OFF				OFF		Cellular Processes	Cofactors	Phosphate	Other	CytoplasmicMembrane	CD3268	CD630_32680
CDIF630erm_03569	CD630_32690	Putative oligoendopeptidase F, M3B family	-1.29479		-1.07518		-2.76075	*	-1.78583		Cellular process	Protein folding and degradation	Peptidases	Other	Cytoplasmic	CD3269	CD630_32690	SigF; SigE; SigB
CDIF630erm_03573	feoA4	Ferrous iron transport protein					ON		1.97925		Cellular Processes	Cofactors	Iron	281473	Cytoplasmic	CD3273	CD630_32730	Hfq; Fur
CDIF630erm_03574	feoB2	Ferrous iron transport protein B	-1.36711		-3.71574	*	0.854288		-1.05128	*	Cellular Processes	Cofactors	Iron	281473	CytoplasmicMembrane	CD3274	CD630_32740	Fur
CDIF630erm_03575	CD630_32750	Putative phosphosugar isomerase			OFF		OFF		OFF		Cellular Processes	Carbohydrate metabolism	Biosynthesis and degradation of surface polysaccharides and lipopolysaccharides	CD3275	Cytoplasmic	CD3275	CD630_32750	RpoN (Target)
CDIF630erm_03579	CD630_32790	PTS system, mannose/fructose/sorbose IIB component (EC 2.7.1.69)	OFF						OFF		Cellular Processes	Carbohydrate metabolism	Mannose	CD3275	Cytoplasmic	CD3279	CD630_32790	ccpA; RpoN (Target)
CDIF630erm_03581	proC1	Pyrroline-5-carboxylate reductase (P5C reductase) (P5CR) (EC 1.5.1.2) (PCA reductase)	-0.227661		0.328467		-2.20333	*	-1.10775		Cellular Processes	Amino acid metabolism	Proline and 4-hydroxyproline metabolism	Other	Cytoplasmic	CD3281	CD630_32810
CDIF630erm_03582	pflD	Pyruvate formate-lyase (EC 2.3.1.54)/ putative 4-hydroxyproline dehydratase	1.54446	*	1.20726		1.0664		1.49729	*	Cellular Processes	Central energy metabolism	Conversion of pyruvate to acetyl-CoA	281475	Cytoplasmic	CD3282	CD630_32820	SigB
CDIF630erm_03583	pflE	Pyruvate formate-lyase (Activating enzyme) (EC 1.97.1.4) //putative 4-hydroxyproline dehydratase activating enzyme	0.494985		0.217365		1.20111		0.820588		Cellular Processes	Central energy metabolism	Conversion of pyruvate to acetyl-CoA	281475	Cytoplasmic	CD3283	CD630_32830	SigB
CDIF630erm_03584	CD630_32840	Serine protease, HrtA family (EC 3.4.21.-)	-1.31343		-1.51398	*	0.214851		-1.20469	*	Cellular process	Protein folding and degradation	Protein folding and degradation	Other	Unknown	CD3284	CD630_32840	ccpA
CDIF630erm_03585	pgi	Glucose-6-phosphate isomerase (GPI) (EC 5.3.1.9) (Phosphoglucose isomerase) (PGI) (Phosphohexose isomerase) (PHI)	-0.700915		-1.66162		-1.75819	*	-5.2646	*	Cellular Processes	Energy metabolism	Glycolysis and gluconeogenesis	Other	Cytoplasmic	CD3285	CD630_32850	Hfq; SpoA
CDIF630erm_03586	CD630_32860	Putative sodium:phosphate symporter	-0.996989		-2.64031	*	2.02232	*	0.214114		Miscellaneous	Miscellaneous	Uncharacterized proteins	CD3286	CytoplasmicMembrane	CD3286	CD630_32860
CDIF630erm_03587	CD630_32870	Putative oxidoreductase, FAD dependent	OFF		OFF	*	0.619283		1.90145		Miscellaneous	Miscellaneous	Uncharacterized proteins	CD3286	Cytoplasmic	CD3287	CD630_32870
CDIF630erm_03588	CD630_32880	Uncharacterized protein		*	-0.439445				0.926279		Miscellaneous	Miscellaneous	Uncharacterized proteins	CD3286	Unknown	CD3288	CD630_32880
CDIF630erm_03589	CD630_32890	Uncharacterized protein					-2.53093				Miscellaneous	Miscellaneous	Uncharacterized proteins	CD3286	Cytoplasmic	CD3289	CD630_32890	SigH
CDIF630erm_03590	yccF	Uncharacterized protein	-1.45941				-1.03642		-0.489541		Miscellaneous	Miscellaneous	Uncharacterized proteins	CD3286	Cytoplasmic	CD3290	CD630_32900	SigH
CDIF630erm_03596	pilB1	Type IV pilus assembly ATPase	OFF								Cell Envelope	Adhesion and motility	Type IV pilus	Other	Cytoplasmic	CD3296	CD630_32960	SigB
CDIF630erm_03598	CD630_32980	Putative ATP/GTP-binding protein	ON		ON						Cellular Processes	DNA and RNA metabolism	Nucleosides and nucleotide metabolism	Other	Cytoplasmic	CD3298	CD630_32980	SigF; SigE; SpoA; SigB
CDIF630erm_03601	engB	Probable GTP-binding protein EngB	-0.850381		-0.735483		-0.760452		0.238069		Cellular process	Protein synthesis	Ribosome biogenesis	Other	Unknown	CD3300	CD630_33000
CDIF630erm_03602	lon	Lon protease (EC 3.4.21.53) (ATP-dependent protease La)	-0.521338		-0.55468		-0.707449		0.524656		Cellular process	Protein folding and degradation	Protein folding and degradation	Other	Cytoplasmic	CD3301	CD630_33010
CDIF630erm_03605	clpX	ATP-dependent Clp protease ATP-binding subunit ClpX	-1.85969		-2.84304	*	1.25591	*	1.08774	*	Cellular Processes	Stress Response and virulence	Universal stress response	CD3304	Cytoplasmic	CD3304	CD630_33040
CDIF630erm_03606	clpP1	ATP-dependent Clp protease proteolytic subunit (EC 3.4.21.92) (Endopeptidase Clp)	-0.0462915		0.682976		-1.11141		-2.08329		Cellular Processes	Stress Response and virulence	Universal stress response	CD3304	Cytoplasmic	CD3305	CD630_33050
CDIF630erm_03607	tig	Trigger factor (TF) (EC 5.2.1.8) (PPIase)	-0.179625		-0.992744		-1.38603	*	-1.53144		Cellular Processes	Stress Response and virulence	Universal stress response	CD3304	Cytoplasmic	CD3306	CD630_33060
CDIF630erm_03608	CD630_33070	Phosphoesterase (EC 3.1.4.-)	-0.324421		0.333535		1.5238		-0.200617		Cellular Processes	Cofactors	Phosphate	CD3304	Cytoplasmic	CD3307	CD630_33070
CDIF630erm_03609	rph	bifunctional tRNA nucleotidyltransferase / nucleoside- triphosphate diphosphatase	-0.180924		-1.45888		-0.681178		0.0103293		Cellular Processes	DNA and RNA metabolism	RNA Processing	CD3304	Cytoplasmic	CD3308	CD630_33080
CDIF630erm_03610	ligA	DNA ligase (EC 6.5.1.2) (Polydeoxyribonucleotide synthase [NAD(+)])	-1.75527		-0.828462		-1.40845		1.3018		Cellular Processes	DNA and RNA metabolism	DNA repair	Other	Cytoplasmic	CD3309	CD630_33090	SigB
CDIF630erm_03611	CD630_33100	Putative D-isomer specific 2-hydroxyacid dehydrogenase (EC 1.1.1.-)	-0.642652		0.115836		-1.77515		-1.29166		Cellular Processes	Central energy metabolism	Electron transport	Other	Cytoplasmic	CD3310	CD630_33100	ccpA; SigB
CDIF630erm_03612	CD630_33110	Uncharacterized protein	-0.707851				OFF				Miscellaneous	Miscellaneous	Uncharacterized proteins	Other	Cytoplasmic	CD3311	CD630_33110	SigB
CDIF630erm_03614	hydN1	electron transport protein	-1.03892		0.627954		0.310356		-0.243409		Cellular Processes	CO2 fixation	Acetyl-CoA-Wood-Ljungdahl Pathway	CD3313	Cytoplasmic	CD3313	CD630_33130	SigH; Hfq; SigB
CDIF630erm_03615	hydA	Iron hydrogenase (EC 1.12.7.2)	0.397987		-0.131712		-0.326257		0.188533		Cellular Processes	CO2 fixation	Acetyl-CoA-Wood-Ljungdahl Pathway	CD3313	Cytoplasmic	CD3314	CD630_33140	SigH; SpoA; SigB
CDIF630erm_03616	hydN2	electron transport protein	0.687329		1.38871	*	-1.77657		-2.42165		Cellular Processes	CO2 fixation	Acetyl-CoA-Wood-Ljungdahl Pathway	CD3313	CytoplasmicMembrane	CD3315	CD630_33150	SigB
CDIF630erm_03619	fdhF	Formate dehydrogenase-H (Selenocysteine) (EC 1.2.1.2)	-0.088396		0.754855		-0.489783		0.682308		Cellular Processes	CO2 fixation	Acetyl-CoA-Wood-Ljungdahl Pathway	CD3313	Cytoplasmic	CD3317	CD630_33170	SigH; SigB
CDIF630erm_03622	cprR	Two-component response regulator			OFF		ON				Cellular Processes	Stress Response and virulence	Resistance to antimicrobial peptides	Other	Cytoplasmic	CD3320	CD630_33200
CDIF630erm_03623	CD630_33210	Uncharacterized protein	0.349808		0.0132747		2.27906	*	1.36175		Miscellaneous	Miscellaneous	Uncharacterized proteins	Other	CytoplasmicMembrane	CD3321	CD630_33210	CodY
CDIF630erm_03627	CD630_33250	putative iron-sulfur cluster-binding protein	-1.58299		-1.33066		1.88933	*	1.29214	*	Cellular Processes	Cofactors	Iron-sulfur cluster	Other	Unknown	CD3325	CD630_33250	c-di-GMP
CDIF630erm_03632	CD630_33300	Transcriptional regulator, HTH-type Tn916-like,CTn6-Orf6					ON				Cellular Processes	Stress Response and virulence	Prophages	Other	Cytoplasmic	CD3330	CD630_33300	ccpA
CDIF630erm_03633	CD630_33310	Putative conjugative transposon protein Tn916-like, CTn6-Orf7					ON				Cellular Processes	Stress Response and virulence	Prophages	Other	Cytoplasmic	CD3331	CD630_33310
CDIF630erm_03636	CD630_33331	Putative conjugative transposon protein Tn916-like, CTn6-Orf10	OFF		OFF		1.69292		1.24147		Cellular Processes	Stress Response and virulence	Prophages	281489	Cytoplasmic	CD3333A	CD630_33331
CDIF630erm_03637	CD630_33340	Putative transcriptional regulator Tn916-like,CTn6-Orf11					ON				Cellular Processes	Stress Response and virulence	Prophages	281489	Unknown	CD3334	CD630_33340
CDIF630erm_03647	CD630_33470	Putative membrane protein	-2.12681		OFF		-0.644957		-3.82108		Cell Envelope	Cell membrane	Cell membrane	Other	CytoplasmicMembrane	CD3347	CD630_33470
CDIF630erm_03648	CD630_33480	beta-lactamase-like protein	0.588791		0.620459		-2.60115		-0.666374		Miscellaneous	Miscellaneous	Uncharacterized proteins	Other	Unknown	CD3348	CD630_33480
CDIF630erm_03651	clpP2	ATP-dependent Clp protease proteolytic subunit (EC 3.4.21.92) (Endopeptidase Clp)	0.444388		-0.710486				OFF		Cellular Processes	Stress Response and virulence	Universal stress response	Other	Cytoplasmic	CD3351	CD630_33510
CDIF630erm_03654	CD630_33540	Putative tRNA-binding protein					ON				Miscellaneous	Miscellaneous	Uncharacterized proteins	Other	Unknown	CD3354	CD630_33540
CDIF630erm_03655	CD630_33550	Putative nitroreductase	0.372292		-0.443578		-0.406777		-0.0528243		Cellular Processes	Central energy metabolism	Electron transport	Other	Cytoplasmic	CD3355	CD630_33550	ccpA; Hfq
CDIF630erm_03656	CD630_33560	Transcriptional regulator, hxlR family			OFF				0.479384		Cellular Processes	Regulation and cell signaling	Transcriptional regulators	HxlR family transcriptional regulators	Unknown	CD3356	CD630_33560
CDIF630erm_03657	CD630_33570	Putative protease/amidase	-1.25736		-1.39531		1.51068	*	0.920789	*	Cellular process	Protein folding and degradation	Protein folding and degradation	Other	Cytoplasmic	CD3357	CD630_33570
CDIF630erm_03658	CDIF630erm_03658	Dimeric alpha-beta barrel protein					ON				Miscellaneous	Miscellaneous	Uncharacterized proteins	Other	Unknown	CD3358.1	CD630_33581
CDIF630erm_03659	CD630_33590	ABC-type transport system, ATP-binding protein (EC 3.6.3.-)					ON		2.00607		Miscellaneous	Miscellaneous	Uncharacterized proteins	Other	Cytoplasmic	CD3359	CD630_33590
CDIF630erm_03665	CD630_33650	Diguanylate kinase	-0.445367		-1.07798		2.09584	*	1.16892		Cellular Processes	Regulation and cell signaling	C-di-GMP signaling	Other	CytoplasmicMembrane	CD3365	CD630_33650
CDIF630erm_03666	CD630_33660	Putative exported protein	ON						ON		Miscellaneous	Miscellaneous	Uncharacterized proteins	Other	Unknown	CD3366	CD630_33660
CDIF630erm_03673	CD630_33700	Putative recombinase Tn916-like, CTn7-Orf1			OFF		1.41747		1.89961		Cellular Processes	Stress Response and virulence	Prophages	Other	Cytoplasmic	CD3370	CD630_33700
CDIF630erm_03675	CD630_33701	Putative conjugative transposon protein Tn916-like, CTn7-Orf2	ON		ON		ON		ON		Cellular Processes	Stress Response and virulence	Prophages	CD3370A	Cytoplasmic	CD3370A	CD630_33701
CDIF630erm_03676	CD630_33710	Putative conjugative transposon protein Tn916-like, CTn7-Orf3	-0.0569982		-0.209429		2.25523		1.12299		Cellular Processes	Stress Response and virulence	Prophages	CD3370A	Cytoplasmic	CD3371	CD630_33710	SigD
CDIF630erm_03677	mgtA1	Magnesium-transporting ATPase, P-type 1 Tn916-like, CTn7-Orf7 (EC 3.6.3.2)	-0.560887		-2.08641	*	0.507806		-0.404447	*	Cellular Processes	Cofactors	Cation transporters	CD3373	CytoplasmicMembrane	CD3373	CD630_33730	SigD
CDIF630erm_03680	CD630_33760	Putative transcriptional regulator Tn916-like,CTn7-Orf11	3.75273		ON		1.67161		ON		Cellular Processes	Cofactors	Cation transporters	CD3373	Cytoplasmic	CD3376	CD630_33760
CDIF630erm_03681	mgtA2	Magnesium-transporting ATPase, P-type 1 Tn916-like, CTn7-Orf12 (EC 3.6.3.2)	0.0224801		-0.827837		1.3408		0.897807	*	Cellular Processes	Cofactors	Cation transporters	CD3373	CytoplasmicMembrane	CD3377	CD630_33770	ccpA
CDIF630erm_03689	CD630_33860	Putative antirestriction protein Tn916-like,CTn7-Orf22			OFF				-0.31022		Cellular Processes	Stress Response and virulence	Prophages	Other	Cytoplasmic	CD3386	CD630_33860
CDIF630erm_03690	CD630_33870	Putative conjugative transposon protein Tn916-like, CTn7-Orf24			OFF				1.11219		Cellular Processes	Stress Response and virulence	Prophages	Other	Cytoplasmic	CD3387	CD630_33870
CDIF630erm_03695	CD630_33900	Putative conjugative transposon protein DUF961 family Tn196-like, CTn7-Orf29	1.10348		0.4418		-1.73453		0.00799044		Cellular Processes	Stress Response and virulence	Prophages	Other	Unknown	CD3390	CD630_33900
CDIF630erm_03698	rumA	23S rRNA (Uracil-5-)-methyltransferase RumA (23S rRNA(M-5-U1939)-methyltransferase) (EC 2.1.1.-)	-2.64946		-3.45632		1.89036	*	1.625	*	Cellular process	Protein synthesis	Ribosome biogenesis	Other	Cytoplasmic	CD3393	CD630_33930
CDIF630erm_03699	pyk	Pyruvate kinase (EC 2.7.1.40)	-0.601313		-0.038362		-1.96137	*	-0.723789		Cellular Processes	Energy metabolism	Glycolysis and gluconeogenesis	281505	Cytoplasmic	CD3394	CD630_33940	SigH; ccpA; SigB
CDIF630erm_03700	pfkA	ATP-dependent 6-phosphofructokinase (ATP-PFK) (Phosphofructokinase) (EC 2.7.1.11) (Phosphohexokinase)	-0.976683		-1.04587		-1.85264		-3.41945		Cellular Processes	Energy metabolism	Glycolysis and gluconeogenesis	281505	Cytoplasmic	CD3395	CD630_33950	SigH; SigB
CDIF630erm_03701	dnaE	DNA-directed DNA polymerase (EC 2.7.7.7)	-0.594971		-0.985157		1.32706	*	1.54566	*	Cellular Processes	DNA and RNA metabolism	DNA metabolism	CD3396	Cytoplasmic	CD3396	CD630_33960
CDIF630erm_03702	whiA	Probable cell division protein WhiA			OFF		ON		1.80524		Cellular Processes	Cell division and cell death	Cell division	CD3396	Cytoplasmic	CD3397	CD630_33970
CDIF630erm_03703	CD630_33980	Putative hydrolase, NUDIX family	-1.22287		-0.751833		-0.714793		-1.04423		Cellular Processes	DNA and RNA metabolism	DNA metabolism	CD3396	Cytoplasmic	CD3398	CD630_33980
[truncated: 196 more rows]

## Sheet: S2_Overview Heatmap
Table S2: Log2 ratios of all proteins that were found significantly changed in their abundance according to ANOVA analysis for colony biofilms (Col) vs. filtrate samples (Fil) and/or aggregate biofilms (Agg) vs. filtrate samples (Fil) on day 3 (3d) and day 6 (6d). Significant changes according to ANOVA analysis are indicated by a *. "ON": Proteins were only identified under the respective biofilm…
[truncated: 1,123 more rows]

[truncated: 4 more sheets: S3_Surface-exposed proteins, S4_Energy metabolism, S5_Stressresponse and virulence, S6_Regulation and signalling]
